# Supplementary material for: A Ru-catalyzed desulfonylative C-arylation of O-tosyl-hydroxamates
Source: Royal Society of Chemistry journal article supplement (doi:10.1039/d3cc05825e), 2023-12-19
Supplement: d3cc05825e1.pdf [file d3cc05825e1.pdf]

# A Ru-catalyzed aminomethylation of arenes with O-tosyl- hydroxamates

**Authors:** Guobao Li, Tilo Lübken, Bernd Plietker\*

**Affiliations:**

Professur für Organische Chemie I, Fakultät Chemie und Lebensmittelchemie, Technische Universität Dresden, Bergstraße 66, DE-01069 Dresden, Germany.

\*Corresponding author. Email: bernd.plietker@tu-dresden.de.

## Content

|                                                                                               |                                      |
|-----------------------------------------------------------------------------------------------|--------------------------------------|
| 1. General Remarks .....                                                                      | S3                                   |
| 2. Optimization.....                                                                          | S5                                   |
| 3. Preparation of substrates .....                                                            | S11                                  |
| 3.1. General procedure (GP-1) for preparation of <b>2a, 4a-4c</b> .....                       | S11                                  |
| 3.2. General procedure (GP-2) for preparation of <b>5a-5d</b> .....                           | S14                                  |
| 3.3. Procedure for preparation of <b>2r</b> .....                                             | <b>SError! Bookmark not defined.</b> |
| 3.4. General procedure (GP-3) for preparation of <b>3a-3r, 6a-6d</b> .....                    | S18                                  |
| 3.5. General procedure (GP-4) for preparation of <b>1t, 1u</b> .....                          | S34                                  |
| 3.6. Preparation of <b>1w</b> .....                                                           | S36                                  |
| 3.7. Preparation of <b>1v</b> .....                                                           | S37                                  |
| 3.8. Preparation of <b>3q-3u</b> .....                                                        | S38                                  |
| 3.9. Procedure for preparation of <b>3v</b> .....                                             | S41                                  |
| 3.10. Scale-up reaction.....                                                                  | S42                                  |
| 3.11. Further transformation-Heck reaction .....                                              | S43                                  |
| 3.12. Further transformation-C-H activation .....                                             | S44                                  |
| 3.13. Further transformation-Bz removal .....                                                 | S45                                  |
| 4. References .....                                                                           | S46                                  |
| 5. <sup>1</sup> H-, <sup>13</sup> C-, <sup>19</sup> F- NMR Spectra .....                      | S48                                  |
| 6. Chiral HPLC spectrums .....                                                                | S96                                  |
| 7. 2D- ( <sup>1</sup> H/ <sup>1</sup> H-, <sup>1</sup> H/ <sup>13</sup> C-) NMR Spectra ..... | S100                                 |

## 1. General Remarks

The solvent compositions used are given as volume ratios. All solvents except H<sub>2</sub>O, *n*-pentane, *n*-heptane, and EtOAc were distilled before use. The dried solvents DCM, diethyl ether, toluene, acetonitrile, and *n*-pentane were obtained from a solvent drying plant (SPS). THF used was distilled over sodium using benzophenone as an indicator. The solvents DMF, chloroform, MeOH, EtOH, triethylamine, 1,2-DCE, 1,4-dioxane, and DMSO, were distilled over suitable desiccants and stored under an inert atmosphere - unless explicitly marked otherwise. The reagents used were obtained from Sigma Aldrich, TCI, Alfa Aesar, Acros Organics, Fluka, Porphychem, abcr, BLD, and ChemPur and, unless otherwise stated, used without further purification. All water and air-sensitive reactions were performed under an inert N<sub>2</sub> or Ar atmosphere using standard Schlenk techniques. Glassware was dried by extensive heating under a high vacuum.

NMR spectra were recorded on a Bruker Avance II 300 spectrometer at 300 MHz (<sup>1</sup>H NMR), 75 MHz (<sup>13</sup>C NMR), 282 MHz (<sup>19</sup>F NMR), a Bruker Ascend 400 spectrometer at 400 MHz (<sup>1</sup>H NMR), 376 MHz (<sup>19</sup>F NMR), 101 MHz (<sup>13</sup>C NMR), a Bruker DRX 500 spectrometer at 500 MHz (<sup>1</sup>H NMR), 126 MHz (<sup>13</sup>C NMR), 202 MHz (<sup>31</sup>P NMR), a Bruker Avance III 600 spectrometer at 600 MHz (<sup>1</sup>H), 150 MHz (<sup>13</sup>C NMR) or a Bruker 700 spectrometer at 700 MHz (<sup>1</sup>H NMR), 176 MHz (<sup>13</sup>C NMR). Chemical shifts are reported in ppm relative to tetramethylsilane. Residual solvent signals were used as reference. Coupling constants *J* are given in Hz. The following abbreviations are used in the analysis of NMR spectra: *s* = singlet, *d* = doublet, *t* = triplet, *q* = quartet, *hept* = heptet, *sept* = septet. These abbreviations are combined whenever more than one coupling is observed. IR spectra were measured on a Bruker Vector 22 FT-IR spectrometer in ATR mode. The measured values are given in reciprocal wavelength (cm<sup>-1</sup>). The intensity of the observed peaks is given in parenthesis: *s* = strong, *m* = medium, *w* = weak. Mass spectra were measured using electrospray ionization on a Bruker micrOTOF-Q.

Thin-layer chromatography was carried out on TLC aluminum foil (silica gel 60, F254) from Macherey-Nagel. UV light was used to detect the individual spots, and the TLC foils were treated with sulfuric KMnO<sub>4</sub> solution, or 10% molybdophosphoric acid solution in EtOH. Column chromatographic purifications were carried out on silica gel (0.040–0.063 mm, 230–400 mesh) from Macherey-Nagel, silica gel 60 (230-400 mesh) from Fluka or Alox (N). Some compounds were purified using semi-preparative High-performance liquid chromatography

(HPLC). The K-501 pump and the RI detector K-2400 from Knauer were used in connection with a column of the type VP 250/21 Nucleodur 100-5 C18 from Macherey-Nagel. Mixtures of ethyl acetate and petroleum ether or isohexane were used as eluents, and a flow rate of 10 mL/min was set.

High-resolution mass analysis was performed by Claudia Guttroff and analytic department of University of Stuttgart on the devices MAT 95 from Finnigan (EI) and micro-TOF-Q from Bruker (ESI). High-resolution mass analysis was also performed by Dr. Ingmar Bauer and Anne Jäger using an LC-MS coupling from Hewlett Packard (HPLC: 1100, mass detector: Esquire-LC, ESI).

Enantiomeric excess (ee) was measured on an Agilent HPLC 1100 Series system equipped with the Daicel Chiralpak column.

## 2. Optimization

Table S1. Screening of catalysts

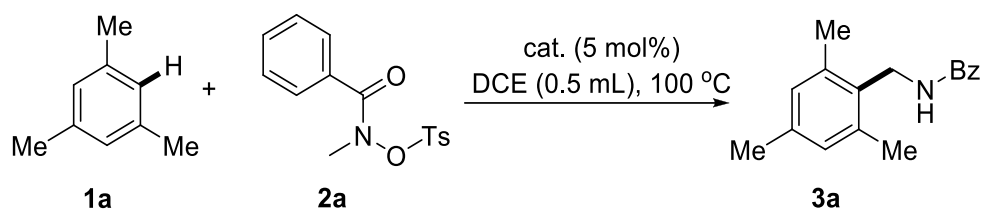

| entry             | Catalyst                                                 | result <sup>[a]</sup> |
|-------------------|----------------------------------------------------------|-----------------------|
| 1                 | <i>trans</i> -Ru(PNNP)PF <sub>6</sub>                    | 30%                   |
| 2                 | Ru(PPh <sub>3</sub> ) <sub>2</sub> (CO)HCl               | 13%                   |
| 3                 | <i>cis</i> -Ru(PNNP)PF <sub>6</sub>                      | 30%                   |
| 5                 | Ru(NNNN)PF <sub>6</sub>                                  | 35%                   |
| 6                 | RuCl <sub>3</sub>                                        | trace                 |
| 7                 | [Ru( <i>p</i> -cymene)Cl <sub>2</sub> ] <sub>2</sub>     | 11%                   |
| 8                 | Ru(DMSO) <sub>4</sub> Cl <sub>2</sub>                    | 24%                   |
| 9                 | Ru(PMe) <sub>3</sub> Cl <sub>2</sub>                     | trace                 |
| 10                | Ru(PPh <sub>3</sub> ) <sub>3</sub> Cl <sub>2</sub>       | 65%                   |
| 11                | Ru(PPh <sub>3</sub> ) <sub>3</sub> H <sub>2</sub>        | trace                 |
| 12                | Ru(P(4-ClPh) <sub>3</sub> ) <sub>3</sub> Cl <sub>2</sub> | 18%                   |
| 13 <sup>[b]</sup> | Ru(PPh <sub>3</sub> ) <sub>3</sub> Cl <sub>2</sub>       | 72%                   |
| 14 <sup>[b]</sup> | Ru(NNNN)PF <sub>6</sub>                                  | 47%                   |
| 15 <sup>[b]</sup> | <i>trans</i> -Ru(PNNP)PF <sub>6</sub>                    | 33%                   |
| 16                | Rh(PPh <sub>3</sub> ) <sub>3</sub> Cl                    | 0%                    |
| 17                | Pd(PPh <sub>3</sub> ) <sub>2</sub> Cl <sub>2</sub>       | 0%                    |

[a] Reaction condition: **1a** (0.1 mmol), **2a** (0.1 mmol), catalyst (5 mol%), in DCE (0.5 mL) at 100 °C for 18 h under air in a sealed tube. Yield is determined by GC analysis using dodecane as internal standard. [b] using 1.5 equiv **2a**.

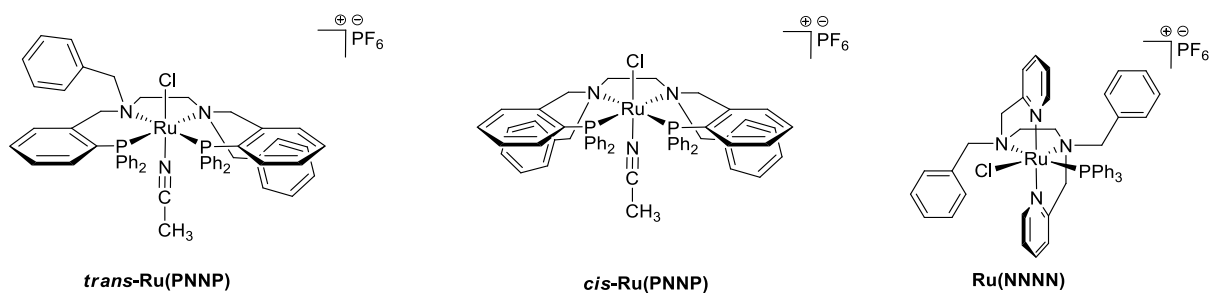

Table S2. Screening of solvents

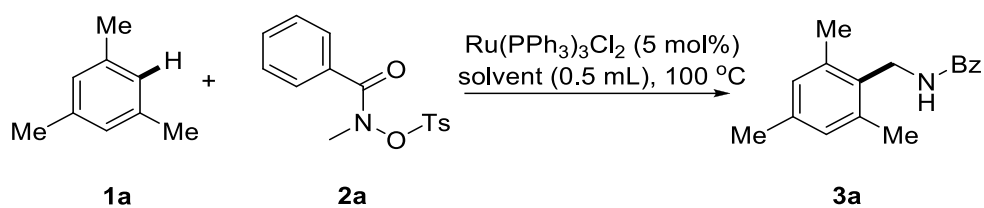

| entry             | solvent              | result <sup>[a]</sup> |
|-------------------|----------------------|-----------------------|
| 1                 | DCE                  | 65%                   |
| 2                 | THF                  | trace                 |
| 3                 | DMF                  | n.r.                  |
| 4                 | 1,4-dioxane          | trace                 |
| 5                 | ArF <sub>6</sub>     | 11%                   |
| 6                 | DCM                  | 38%                   |
| 7                 | chloroform           | 32%                   |
| 8                 | trifluorotoluene     | 16%.                  |
| 9                 | fluorobenzene        | 18%                   |
| 10                | CCl <sub>4</sub>     | n.d.                  |
| 11                | MeCN                 | trace                 |
| 12                | cyclohexane          | trace                 |
| 13                | DMSO                 | n.r.                  |
| 14                | <i>iso</i> -propanol | trace                 |
| 15                | 1,2-dichlorobenzene  | 35%                   |
| 16                | EtOAc                | n.r.                  |
| 17                | acetone              | n.r.                  |
| 18 <sup>[b]</sup> | DCM                  | 50%                   |
| 19 <sup>[b]</sup> | THF                  | trace                 |
| 20 <sup>[b]</sup> | ArF <sub>6</sub>     | 12%                   |

|                   |             |       |
|-------------------|-------------|-------|
| 21 <sup>[b]</sup> | cyclohexane | trace |
| 22 <sup>[c]</sup> | DCE         | 65%   |

[a] Reaction condition: **1a** (0.1 mmol), **2a** (0.1 mmol), Ru(PPh<sub>3</sub>)<sub>3</sub>Cl<sub>2</sub> (5 mol%), in solvent (0.5 mL) at 100 °C for 18 h under air in a sealed tube. Yield is determined by GC analysis using dodecane as internal standard. [b] using 1.5 equiv **2a**. [c] using dry DCE under Ar in a Schlenk tube.

Table S3. Screening of base

| entry | base                            | result <sup>[a]</sup> |
|-------|---------------------------------|-----------------------|
| 1     | K <sub>2</sub> CO <sub>3</sub>  | trace                 |
| 2     | Cs <sub>2</sub> CO <sub>3</sub> | n.r.                  |
| 3     | Li <sub>2</sub> CO <sub>3</sub> | n.r.                  |
| 4     | KHCO <sub>3</sub>               | 5%                    |
| 5     | KOAc                            | 58%                   |
| 6     | K <sub>3</sub> PO <sub>4</sub>  | n.r.                  |
| 7     | Et <sub>3</sub> N               | n.r.                  |
| 8     | none                            | 65%                   |

[a] Reaction condition: **1a** (0.1 mmol), **2a** (0.1 mmol), Ru(PPh<sub>3</sub>)<sub>3</sub>Cl<sub>2</sub> (5 mol%), base (1 equiv) in DCE (0.5 mL) at 100 °C for 18 h under air in a sealed tube. Yield is determined by GC analysis using dodecane as internal standard.

Table S4. Screening of amount of **2a**

| entry | amount of <b>2a</b> | result <sup>[a]</sup> |
|-------|---------------------|-----------------------|
| 1     | 1.0 equiv <b>2a</b> | 65%                   |
| 2     | 1.5 equiv <b>2a</b> | 72%                   |

|   |                     |     |
|---|---------------------|-----|
| 3 | 2.0 equiv <b>2a</b> | 73% |
| 4 | 2.5 equiv <b>2a</b> | 55% |

[a] Reaction condition: **1a** (0.1 mmol), **2a** (x mmol), Ru(PPh<sub>3</sub>)<sub>3</sub>Cl<sub>2</sub> (5 mol%) in DCE (0.5 mL) at 100 °C for 18 h under air in a sealed tube. Yield is determined by GC analysis using dodecane as internal standard.

Table S5. Screening of amount of catalyst

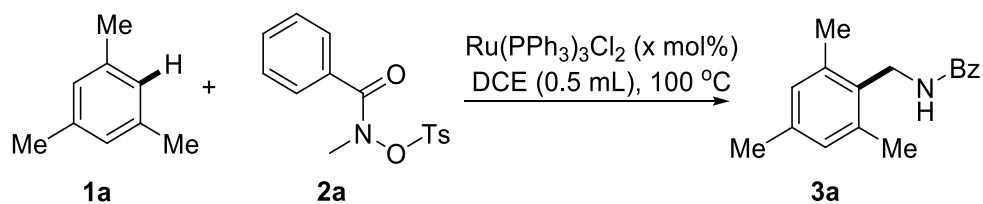

| entry | amount of cat. (mol%) | result <sup>[a]</sup> |
|-------|-----------------------|-----------------------|
| 1     | 0.50                  | 15%                   |
| 2     | 1.00                  | 28%                   |
| 3     | 2.50                  | 41%                   |
| 4     | 5.00                  | 72%                   |
| 5     | 7.50                  | 66%                   |

[a] Reaction condition: **1a** (0.1 mmol), **2a** (0.15 mmol), Ru(PPh<sub>3</sub>)<sub>3</sub>Cl<sub>2</sub> (5 mol%) in DCE (0.5 mL) at 100 °C for 18 h under air in a sealed tube. Yield is determined by GC analysis using dodecane as internal standard.

Table S6. Screening amount of solvent

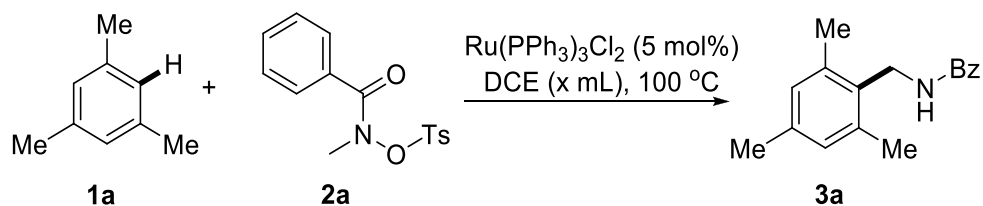

| entry | amount of DCE | result <sup>[a]</sup> |
|-------|---------------|-----------------------|
| 1     | 0.1 mL        | 38%                   |
| 2     | 0.5 mL        | 72%                   |
| 3     | 1.0 mL        | 55%                   |
| 4     | 2.0 mL        | 28%                   |



[a] Reaction condition: **1a** (0.1 mmol), **2a** (0.15 mmol), Ru(PPh<sub>3</sub>)<sub>3</sub>Cl<sub>2</sub> (5 mol%) in DCE (x mL) at 100 °C for 18 h under air in a sealed tube. Yield is determined by GC analysis using dodecane as internal standard.

Table S7. Screening temperature

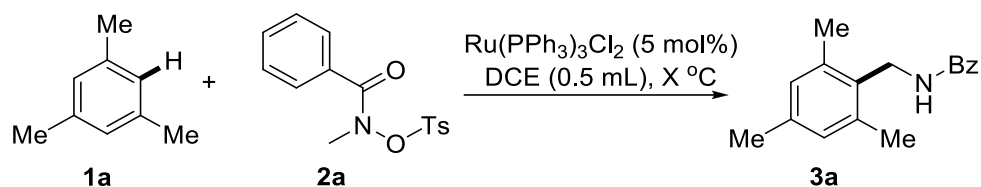

| entry | temp. (°C) | result <sup>[a]</sup> |
|-------|------------|-----------------------|
| 1     | 40         | trace                 |
| 2     | 60         | 3%                    |
| 3     | 80         | 13%                   |
| 4     | 90         | 62%                   |
| 5     | 100        | 72%                   |
| 6     | 110        | 58%                   |
| 7     | 130        | 18%                   |

[a] Reaction condition: **1a** (0.1 mmol), **2a** (0.15 mmol), Ru(PPh<sub>3</sub>)<sub>3</sub>Cl<sub>2</sub> (5 mol%) in DCE (0.5 mL) at X °C for 18 h under air in a sealed tube. Yield is determined by GC analysis using dodecane as internal standard.

Table S8. Screening reaction time

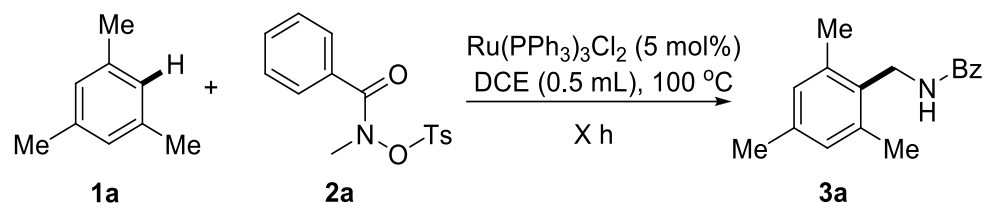

| entry | time | result <sup>[a]</sup> |
|-------|------|-----------------------|
| 1     | 1 h  | 64%                   |
| 2     | 8 h  | 69%                   |
| 3     | 18 h | 72%                   |
| 4     | 24 h | 72%                   |

[a] Reaction condition: **1a** (0.1 mmol), **2a** (0.15 mmol), Ru(PPh<sub>3</sub>)<sub>3</sub>Cl<sub>2</sub> (5 mol%) in DCE (0.5 mL) at 100 °C for X h under air in a sealed tube. Yield is determined by GC analysis using dodecane as internal standard.

Table S9. Screening additive

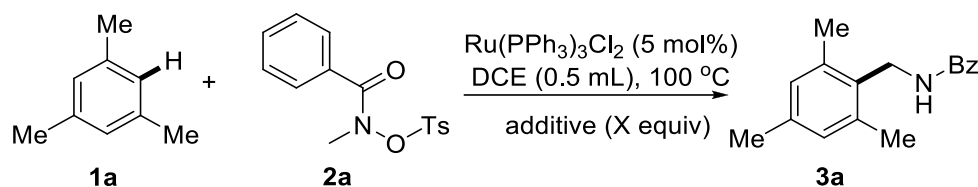

| entry | amount of additive                                    | result <sup>[a]</sup> |
|-------|-------------------------------------------------------|-----------------------|
| 1.    | PivOH (0.3 eq)                                        | 40%                   |
| 2.    | TsOH (0.3 eq)                                         | 45%                   |
| 3.    | MesCOOH (0.3 eq)                                      | 34%                   |
| 4.    | AgNTf <sub>2</sub> (0.2 eq)                           | trace                 |
| 5.    | AgOTf (0.2 eq)                                        | 12%                   |
| 6.    | AgBF <sub>4</sub> (0.2 eq)                            | trace                 |
| 7.    | AgPF <sub>6</sub> (0.2 eq)                            | trace                 |
| 8.    | 4Å MS (100 mg)                                        | n.r.                  |
| 9.    | TfOH (0.3 eq)                                         | trace                 |
| 10.   | TFA (0.3 eq)                                          | 27%                   |
| 11.   | H <sub>2</sub> O (1 eq)                               | 41%                   |
| 12.   | AgOAc (0.5 eq)                                        | n.r.                  |
| 13.   | Cu(OAc) <sub>2</sub> (0.5 eq)                         | 18%                   |
| 14.   | BQ (0.5 eq)                                           | trace                 |
| 15.   | K <sub>2</sub> S <sub>2</sub> O <sub>8</sub> (0.5 eq) | 28%                   |
| 16.   | O <sub>2</sub> (1 atm)                                | 65%                   |
| 17.   | PCy <sub>3</sub> (0.3 eq)                             | trace                 |
| 18.   | P(4-MeOPh) <sub>3</sub> (0.2 eq)                      | 28%                   |
| 19.   | P(4-FPh) <sub>3</sub> (0.2 eq)                        | 34%                   |
| 20.   | DPPE (0.2 eq)                                         | 10%                   |
| 21.   | Phen (0.2 eq)                                         | 20%                   |

[a] Reaction condition: **1a** (0.1 mmol), **2a** (0.15 mmol), Ru(PPh<sub>3</sub>)<sub>3</sub>Cl<sub>2</sub> (5 mol%) and additive (X equiv) in DCE (0.5 mL) at 100 °C for 18 h under air in a sealed tube. Yield is determined by GC analysis using dodecane as internal standard.

### 3. Preparation of substrates

#### 3.1. General procedure (GP-1) for preparation of **2a**, **4a-4c**

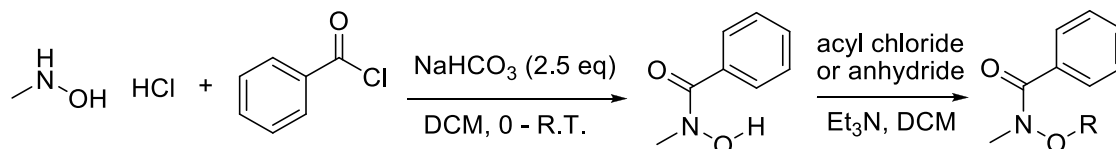

Step 1: NaHCO<sub>3</sub> (4.2 g, 50 mmol, 2.5 equiv) was added to a solution of MeNH(OH)·HCl (1.8 g, 22 mmol, 1.1 equiv) in DCM (140 mL) at room temperature. Then the mixture was cooled to 0 °C and a solution of benzoyl chloride (2.8 g, 20 mmol, 1.0 equiv) in DCM (70 mL) was added. The resulting reaction mixture was stirred overnight at room temperature and filtered off the insoluble precipitate. The filtrate was washed with water 3 times, then the organic layers were dried (Na<sub>2</sub>SO<sub>4</sub>) and evaporated *in vacuo* to afford the crude compound as a light yellow oil, which was used without further purification.<sup>[1]</sup>

Step 2: Corresponding acyl chloride or anhydride (5.5 mmol, 1.1 equiv) and Et<sub>3</sub>N (0.76 g, 7.5 mmol, 1.5 equiv) were added to a solution of *N*-hydroxy-*N*-methylbenzamide (0.75 g, 5 mmol, 1 equiv) in DCM (50 mL) at 0 °C. The resulting reaction mixture was stirred at room temperature overnight. The solvent was removed *in vacuo* and the crude mixture was purified by flash column chromatography on silica gel iso-hexane/EtOAc (v/v=7:1) to obtain the product.<sup>[2]</sup>

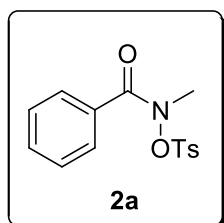

According to GP-1, *N*-hydroxy-*N*-methylbenzamide (5.0 mmol, 0.75 g), Et<sub>3</sub>N (7.5 mmol, 1.05 mL), TsCl (5.5 mmol, 1.05 g) in DCM (50 mL) afforded **2a** as a white solid after purification on silica gel (iso-hexanes: EtOAc = 7:1). Reaction time: 12 h.

***N*-methyl-*N*-(tosyloxy)benzamide**

**Yield:** 1.14 g (3.75 mmol, 75%).

**Physical State:** white solid.

**R<sub>f</sub> Value:** 0.25 (isohexane/EtOAc – 5/1).

**<sup>1</sup>H NMR** (300 MHz, CDCl<sub>3</sub>) δ 7.58 (d, *J* = 8.3 Hz, 2H), 7.42 – 7.22 (m, 5H), 7.14 (d, *J* = 8.1 Hz, 2H), 3.52 (s, 3H), 2.37 (s, 3H).

**<sup>13</sup>C NMR** (75 MHz, CDCl<sub>3</sub>) δ 171.21, 146.18, 132.47, 131.39, 130.22, 129.79, 129.21, 128.47, 128.10, 40.53, 21.81.

**IR** (ATR in CDCl<sub>3</sub>) ν 2948 (s), 1722 (s), 1453 (s), 1282(s), 1159 (s), 1028 (m), 812 (w), 715 (m) cm<sup>-1</sup>.

**HRMS** (ESI MS) calcd for C<sub>15</sub>H<sub>16</sub>NO<sub>4</sub> [M+H<sup>+</sup>]: 306.0795, found: 306.0801.

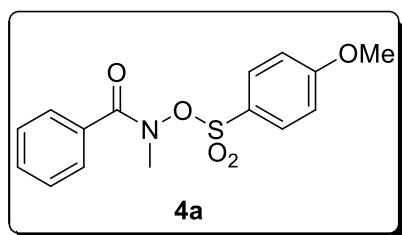

According to GP-1, *N*-hydroxy-*N*-methylbenzamide (2.0 mmol, 0.30 g), Et<sub>3</sub>N (3.0 mmol, 0.42 mL), 4-methoxybenzenesulfonyl chloride (2.2 mmol, 0.45 g) in DCM (20 mL) afforded 4a as a white solid after purification on silica gel (isohexanes: EtOAc = 7:1). Reaction time: 12 h.

***N*-(((4-methoxyphenyl)sulfonyl)oxy)-*N*-methylbenzamide**

**Yield:** 534 mg (1.7 mmol, 83%).

**Physical State:** white solid.

**R<sub>f</sub> Value:** 0.25 (isohexane/EtOAc – 5/1).

**<sup>1</sup>H NMR** (300 MHz, CDCl<sub>3</sub>) δ 7.64 – 7.55 (m, 2H), 7.42 – 7.20 (m, 5H), 6.81 – 6.73 (m, 2H), 6.82 – 6.72 (m, 2H), 3.80 (s, 3H), 3.52 (s, 3H).

**<sup>13</sup>C NMR** (75 MHz, CDCl<sub>3</sub>) δ 171.17, 164.71, 132.66, 131.58, 131.38, 128.56, 128.19, 124.30, 114.47, 55.87, 40.42.

**IR** (ATR in CDCl<sub>3</sub>)  $\nu$ 3063 (m), 2948 (w), 1703 (s), 1595 (s), 1498 (m), 1379 (m), 1192 (s), 1025 (m), 894 (m), 808 (w), 715 (m) cm<sup>-1</sup>.

**HRMS** (ESI MS) calcd for C<sub>15</sub>H<sub>16</sub>NO<sub>5</sub>S [M+H<sup>+</sup>]: 322.0744, found: 322.0751.

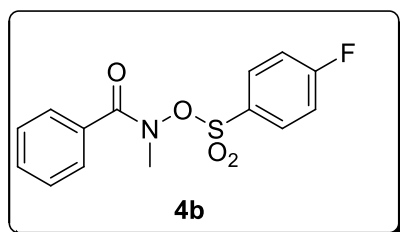

According to GP-1, *N*-hydroxy-*N*-methylbenzamide (2.0 mmol, 0.30 g), Et<sub>3</sub>N (3.0 mmol, 0.42 mL), 4-fluorobenzenesulfonyl chloride (2.2 mmol, 0.43 g) in DCM (20 mL) afforded 4b as a white solid after purification on silica gel (isohexanes: EtOAc = 7:1). Reaction time: 12 h.

***N*-(((4-fluorophenyl)sulfonyl)oxy)-*N*-methylbenzamide**

**Yield:** 420 mg (1.4 mmol, 70%).

**Physical State:** white solid.

**R<sub>f</sub> Value:** 0.25 (isohexane/EtOAc – 5/1).

**<sup>1</sup>H NMR** (300 MHz, CDCl<sub>3</sub>)  $\delta$  7.78 – 7.70 (m, 2H), 7.45 – 7.40 (m, 1H), 7.36 – 7.28 (m, 4H), 7.07 – 6.98 (m, 2H), 3.57 (s, 3H).

**<sup>13</sup>C NMR** (75 MHz, CDCl<sub>3</sub>)  $\delta$  171.24, 166.49 (d,  $J$  = 258.7 Hz), 132.35, 132.30, 132.16, 131.68, 128.49, 128.38, 128.06, 116.63 (d,  $J$  = 22.9 Hz), 40.89.

**<sup>19</sup>F{<sup>1</sup>H} NMR** (282 MHz, CDCl<sub>3</sub>)  $\delta$  -100.80.

**IR** (ATR in CDCl<sub>3</sub>)  $\nu$ 3075 (m), 2981 (w), 1699 (s), 1591 (s), 1386 (m), 1192 (s), 1021 (m), 838 (w), 711 (m) cm<sup>-1</sup>.

**HRMS** (ESI MS) calcd for C<sub>14</sub>H<sub>13</sub>FNO<sub>4</sub>S [M+H<sup>+</sup>]: 310.0549, found: 310.0548.

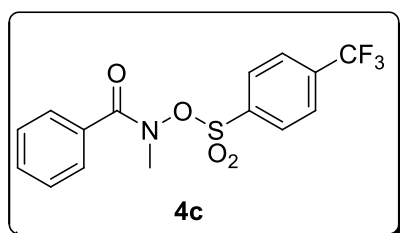

According to GP-1, *N*-hydroxy-*N*-methylbenzamide (2.0 mmol, 0.30 g), Et<sub>3</sub>N (3.0 mmol, 0.42 mL), 4-trifluoromethylbenzenesulfonyl chloride (2.2 mmol, 0.54 g) in DCM (20 mL) afforded 4c as a white solid after purification on silica gel (isohexanes: EtOAc = 7:1). Reaction time: 12 h.

***N*-methyl-*N*-(((4-(trifluoromethyl)phenyl)sulfonyl)oxy)benzamide**

**Yield:** 580 mg (1.6 mmol, 80%).

**Physical State:** white solid.

**R<sub>f</sub> Value:** 0.25 (isohexane/EtOAc – 5/1).

**<sup>1</sup>H NMR** (300 MHz, CDCl<sub>3</sub>) δ 7.83 (d, *J* = 8.0 Hz, 2H), 7.60 (d, *J* = 8.1 Hz, 2H), 7.45 – 7.23 (m, 5H), 3.60 (s, 3H).

**<sup>13</sup>C NMR** (75 MHz, CDCl<sub>3</sub>) δ 171.18, 136.98, 136.20 (q, *J* = 33.3 Hz), 132.10, 131.70, 129.76, 128.42, 128.40, 126.22 (q, *J* = 3.7 Hz), 122.94 (q, *J* = 271.5 Hz), 40.90.

**<sup>19</sup>F{<sup>1</sup>H} NMR** (282 MHz, CDCl<sub>3</sub>) δ -63.49.

**IR** (ATR in CDCl<sub>3</sub>) ν 3071 (s), 1707 (s), 1431 (w), 1334 (s), 1174 (s), 1133 (s), 1066 (m), 842 (w), 719 (m) cm<sup>-1</sup>.

**HRMS** (ESI MS) calcd for C<sub>15</sub>H<sub>13</sub>F<sub>3</sub>NO<sub>4</sub>S [M+H<sup>+</sup>]: 360.0517, found: 360.0519.

### 3.2. General procedure (GP-2) for preparation of 5a-5d

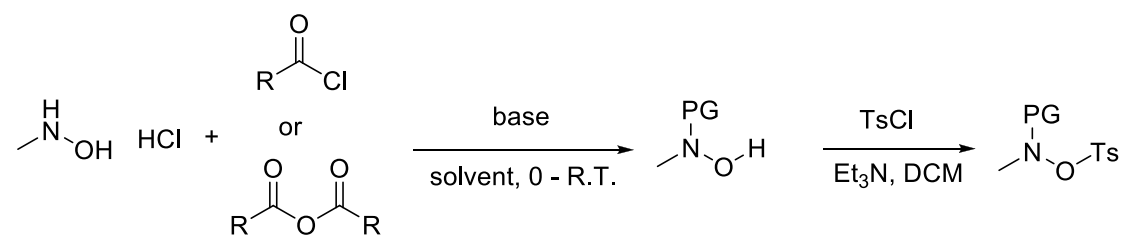

Step 1: NaHCO<sub>3</sub> (4.2 g, 50 mmol, 2.5 equiv) was added to a solution of MeNH(OH)·HCl (1.8 g, 22 mmol, 1.1 equiv) in DCM (140 mL) at room temperature. Then the mixture was cooled to 0 °C and a solution of corresponding acyl chloride or anhydride (20 mmol, 1.0 equiv) in DCM (70 mL) was added. The resulting reaction mixture was stirred overnight at room temperature and filtered off the insoluble precipitate. The filtrate was washed with water 3 times, then the organic layers were dried (Na<sub>2</sub>SO<sub>4</sub>) and evaporated *in vacuo* to afford the crude compound as a light yellow oil, which was used without further purification.<sup>1</sup>

Step 2: TsCl (1.05 g, 5.5 mmol, 1.1 equiv) and Et<sub>3</sub>N (0.76 g, 7.5 mmol, 1.5 equiv) were added to a solution of *N*-hydroxy-*N*-protected amide (5 mmol, 1 equiv) in DCM (50 mL) at 0 °C. The resulting reaction mixture was stirred at room temperature overnight. The solvent was removed *in vacuo* and the crude mixture was purified by flash column chromatography on silica gel isohexane/EtOAc (v/v=7:1) to obtain the product.<sup>2</sup>

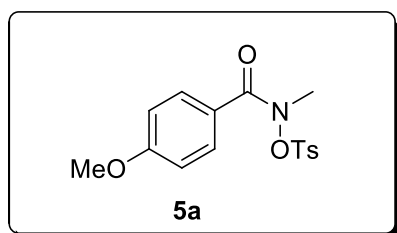

*N*-hydroxy-*N*-methyl-(4-methoxy)benzamide was obtained according to modified procedure (GP-2, step 1). According to GP-2, *N*-hydroxy-*N*-methyl-(4-methoxy)benzamide (5 mmol, 0.91 g), Et<sub>3</sub>N (7.5 mmol, 1.05 mL), TsCl (5.5 mmol, 1.05 g) in DCM (50 mL) afforded 5a as a white solid after purification on silica gel (isohexanes: EtOAc = 7:1). Reaction time: 12 h.

#### 4-methoxy-*N*-methyl-*N*-(tosyloxy)benzamide

**Yield:** 1.44 g (3.95 mmol, 79%).

**Physical State:** white solid.

**R<sub>f</sub> Value:** 0.25 (isohexane/EtOAc – 5/1).

**<sup>1</sup>H NMR** (300 MHz, CDCl<sub>3</sub>) δ 7.62 (d, *J* = 8.2 Hz, 2H), 7.33 (d, *J* = 8.7 Hz, 2H), 7.14 (d, *J* = 8.1 Hz, 2H), 6.75 (d, *J* = 8.7 Hz, 2H), 3.79 (s, 3H), 3.46 (s, 3H), 2.34 (s, 3H).

**<sup>13</sup>C NMR** (75 MHz, CDCl<sub>3</sub>) δ 171.02, 162.21, 146.04, 130.67, 130.38, 129.64, 129.10, 124.28, 113.37, 55.42, 40.99, 21.72.

**IR** (ATR in CDCl<sub>3</sub>) ν 3015 (s), 2952 (s), 2840 (m), 1710 (s), 1602 (s), 1513 (m), 1435 (s), 1252 (s), 1167 (s), 1103 (s), 1028 (w), 846 (m), 767 (m) cm<sup>-1</sup>.

**HRMS** (ESI MS) calcd for C<sub>16</sub>H<sub>18</sub>NO<sub>5</sub>S [M+H<sup>+</sup>]: 366.0906, found: 366.0910.

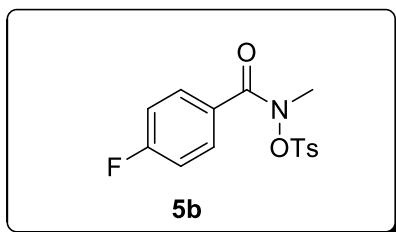

*N*-hydroxy-*N*-methyl-(4-fluoro)benzamide was obtained according to modified procedure (GP-2, step 1). According to GP-2, *N*-hydroxy-*N*-(4-fluoro)benzamide (5 mmol, 0.85 g), Et<sub>3</sub>N (7.5 mmol, 1.05 mL), TsCl (5.5 mmol, 1.05 g) in DCM (50 mL) afforded 5b as a white solid after purification on silica gel (isohexanes: EtOAc = 7:1). Reaction time: 12 h.

**4-fluoro-*N*-methyl-*N*-(tosyloxy)benzamide**

**Yield:** 1.16 g (3.60 mmol, 72%).

**Physical State:** white solid.

**R<sub>f</sub> Value:** 0.25 (isohexane/EtOAc – 5/1).

**<sup>1</sup>H NMR** (300 MHz, CDCl<sub>3</sub>) δ 7.60 – 7.52 (m, 2H), 7.40 – 7.32 (m, 2H), 7.16 (d, *J* = 8.1 Hz, 2H), 6.99 – 6.89 (m, 2H), 3.54 (s, 3H), 2.39 (s, 3H).

**<sup>13</sup>C NMR** (75 MHz, CDCl<sub>3</sub>) δ 170.05, 164.40 (d, *J* = 252.8 Hz), 146.42, 131.10 (d, *J* = 8.9 Hz), 130.25, 129.84, 129.21, 128.60 (d, *J* = 3.4 Hz), 115.20 (d, *J* = 21.9 Hz), 40.21, 21.85.

**<sup>19</sup>F{<sup>1</sup>H} NMR** (282 MHz, CDCl<sub>3</sub>) δ -107.92.

**IR** (ATR in CDCl<sub>3</sub>) ν 3172 (s), 3063 (s), 1722 (s), 1602 (m), 1453 (m), 1282 (s), 1155 (s), 1036 (m), 812 (w), 685 (m) cm<sup>-1</sup>.

**HRMS** (ESI MS) calcd for C<sub>15</sub>H<sub>15</sub>FNO<sub>4</sub>S [M+H<sup>+</sup>]: 324.0706, found: 324.0708.

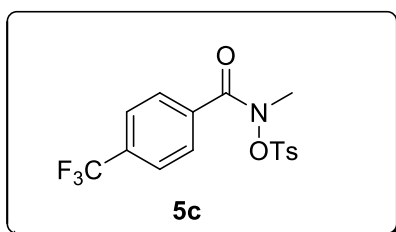

*N*-hydroxy-*N*-methyl-(4-trifluoromethyl)benzamide was obtained according to modified procedure (GP-2, step 1). According to GP-2, *N*-hydroxy-*N*-methyl-(4-trifluoromethyl)benzamide (5 mmol, 1.10 g), Et<sub>3</sub>N (7.5 mmol, 1.05 mL), TsCl (5.5 mmol, 1.05



g) in DCM (50 mL) afforded 5c as a white solid after purification on silica gel (isohexanes: EtOAc = 7:1). Reaction time: 12 h.

***N*-methyl-*N*-(tosyloxy)-4-(trifluoromethyl)benzamide**

**Yield:** 1.44 g (3.8 mmol, 76%).

**Physical State:** white solid.

**R<sub>f</sub> Value:** 0.25 (isohexane/EtOAc – 5/1).

**<sup>1</sup>H NMR** (300 MHz, CDCl<sub>3</sub>) δ 7.46 (t, *J* = 7.9 Hz, 4H), 7.39 (d, *J* = 8.2 Hz, 2H), 7.09 (d, *J* = 8.1 Hz, 2H), 3.59 (s, 3H), 2.37 (s, 3H).

**<sup>13</sup>C NMR** (75 MHz, CDCl<sub>3</sub>) δ 169.50, 146.60, 135.97, 132.62 (q, *J* = 32.8 Hz), 129.97, 129.92, 129.07, 128.88, 124.85 (q, *J* = 3.8 Hz), 123.60 (q, *J* = 270.7 Hz), 39.55, 21.74.

**<sup>19</sup>F{<sup>1</sup>H} NMR** (282 MHz, CDCl<sub>3</sub>) δ -63.15.

**IR** (ATR in CDCl<sub>3</sub>) ν 3168 (s), 3063 (s), 1725 (s), 1453 (s), 1326 (m), 1155 (s), 1036 (w), 1010 (w), 812 (s), 689 (m) cm<sup>-1</sup>.

**HRMS** (ESI MS) calcd for C<sub>16</sub>H<sub>15</sub>F<sub>3</sub>NO<sub>4</sub>S [M+H<sup>+</sup>]: 374.0668, found: 374.0666.

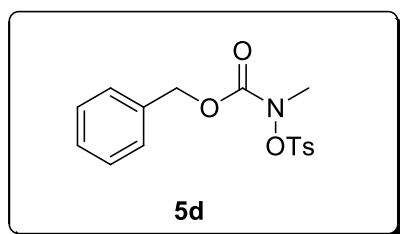

*N*-hydroxy-*N*-methyl-Cbz-amide was obtained according to modified procedure (GP-2, step 1). According to GP-2, *N*-hydroxy-*N*-Cbz amide (5 mmol, 0.90 g), Et<sub>3</sub>N (7.5 mmol, 1.05 mL), TsCl (5.5 mmol, 1.05 g) in DCM (50 mL) afforded 5d as a white solid after purification on silica gel (isohexanes: EtOAc = 7:1). Reaction time: 12 h.

**benzyl methyl(tosyloxy)carbamate**

**Yield:** 1.42 g (4.25 mmol, 85%).

**Physical State:** white solid.

**R<sub>f</sub> Value:** 0.25 (isohexane/EtOAc – 5/1).

**<sup>1</sup>H NMR** (300 MHz, CDCl<sub>3</sub>) δ 7.77 (d, *J* = 8.4 Hz, 2H), 7.33 (dd, *J* = 4.9, 1.8 Hz, 3H), 7.17 (d, *J* = 8.6 Hz, 4H), 4.90 (s, 2H), 3.30 (s, 3H), 2.39 (s, 3H).

**<sup>13</sup>C NMR** (75 MHz, CDCl<sub>3</sub>) δ 157.37, 145.89, 134.91, 130.89, 129.65, 128.63, 128.59, 128.31, 68.93, 40.48, 21.94.

**IR** (ATR in CDCl<sub>3</sub>) ν 3000 (s), 2952 (s), 2855 (s), 1729(s), 1457 (w), 1379 (s), 1308 (m), 1177 (s), 816 (s), 752 (m) cm<sup>-1</sup>.

**HRMS** (ESI MS) calcd for C<sub>16</sub>H<sub>18</sub>NO<sub>5</sub>S [M+H<sup>+</sup>]: 366.0906, found: 366.0908.

### 3.3. General procedure (GP-3) for preparation of 3a-3r, 6a-6d

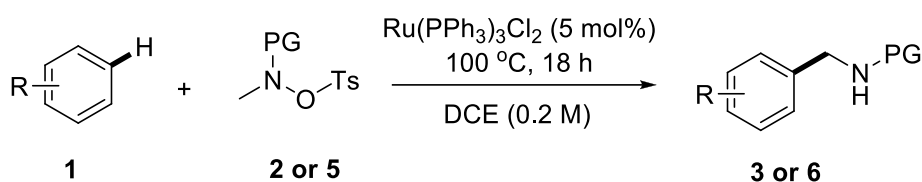

A mixture of **1** (0.2 mmol), *N*-protected-*N*-methyl-hydroxylamine **2** (0.3 mmol), Ru(PPh<sub>3</sub>)<sub>3</sub>Cl<sub>2</sub> (5 mol%), and 1 mL DCE in a 15 mL sealed glass vial was heated at 100 °C under air with vigorous stirring for 18 hours. The reaction mixture was cooled to room temperature, and diluted with ethyl acetate and filtered through celite. The filtrate was concentrated *in vacuo* and purified by column chromatography on silica gel (isohexane/EA = 10/1 to 5/1) to give the corresponding product.

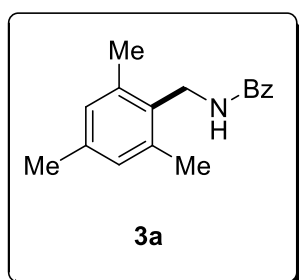

According to GP-3, mesitylene (0.2 mmol, 24.0 mg), *N*-methyl-*N*-(tosyloxy)benzamide (0.3 mmol, 91.5 mg) and Ru(PPh<sub>3</sub>)<sub>3</sub>Cl<sub>2</sub> (5 mol%, 9.6 mg) in DCE (1 mL) afforded **3a** after purification on silica gel (isohexane/EA = 10/1 to 5/1). Reaction time: 18 h.

#### ***N*-(2,4,6-trimethylbenzyl)benzamide**

**Yield:** 36 mg (0.14 mmol, 72%).

**Physical State:** white solid.

**R<sub>f</sub> Value:** 0.27 (isohexane/EtOAc – 5/1).

**<sup>1</sup>H NMR** (300 MHz, CDCl<sub>3</sub>) δ 7.76 – 7.69 (m, 2H), 7.52 – 7.44 (m, 1H), 7.44 – 7.36 (m, 2H), 6.91 (s, 2H), 5.88 (s, 1H), 4.63 (d, *J* = 4.5 Hz, 2H), 2.37 (s, 6H), 2.28 (d, *J* = 6.6 Hz, 3H).

**<sup>13</sup>C NMR** (75 MHz, CDCl<sub>3</sub>) δ 167.52, 137.89, 137.75, 134.50, 131.61, 130.93, 129.41, 128.71, 127.04, 38.89, 21.08, 19.81.

**IR** (ATR in CDCl<sub>3</sub>) ν<sub>3280</sub> (s), 2955 (s), 2918 (m), 1628 (s), 1535 (s), 1453 (w), 1036 (m), 746 (m), 689 (s) cm<sup>-1</sup>.

**HRMS** (ESI MS) calcd for C<sub>17</sub>H<sub>20</sub>NO [M+H<sup>+</sup>]: 154.1545, found: 154.1543.

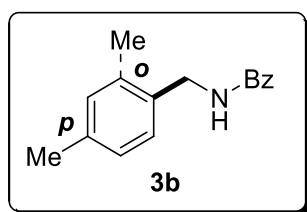

According to GP-3, *N*-methyl-*N*-(tosyloxy)benzamide (0.2 mmol, 61.0 mg) and Ru(PPh<sub>3</sub>)<sub>3</sub>Cl<sub>2</sub> (5 mol%, 9.6 mg) in toluene (1 mL) afforded 3b as a white solid after purification on silica gel (isohexane/EA = 10/1 to 5/1). Reaction time: 18 h.

***N*-(4-methylbenzyl)benzamide and *N*-(2-methylbenzyl)benzamide**

**Yield:** 29 mg (0.13 mmol, 65%).

**Physical State:** white solid.

**R<sub>f</sub> Value:** 0.18 (isohexane/EtOAc – 5/1).

**<sup>1</sup>H NMR** (300 MHz, CDCl<sub>3</sub>) δ 7.81 – 7.74 (m, 2H), 7.54 – 7.47 (m, 1H), 7.46 – 7.39 (m, 2H), 7.27 – 7.15 (m, 4H), 6.32 (s, 0.76H), 6.19 (s, 0.27H), 4.65 (d, *J* = 5.3 Hz, 0.5H), 4.61 (d, *J* = 5.6 Hz, 1.5H), 2.38 (s, 0.72H), 2.35 (s, 2.28H).

**<sup>13</sup>C NMR** (75 MHz, CDCl<sub>3</sub>) δ 167.41, 167.34, 137.50, 136.78, 135.89, 135.27, 134.60, 134.51, 131.67, 131.63, 130.79, 129.59, 128.88, 128.74, 128.70, 128.09, 127.07, 126.43, 44.06, 42.50, 21.24, 19.20.

**IR** (ATR in CDCl<sub>3</sub>)  $\nu$ 3309 (s), 2922 (s), 1640 (s), 1535 (m), 1297 (w), 1028 (w), 805 (w), 745 (m), 693 (s) cm<sup>-1</sup>.

**HRMS** (ESI MS) calcd for C<sub>15</sub>H<sub>16</sub>NO [M+H<sup>+</sup>]: 226.1232, found: 226.1230.

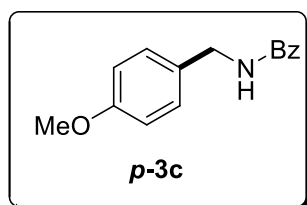

According to GP-3, anisole (0.2 mmol, 21.6 mg), *N*-methyl-*N*-(tosyloxy)benzamide (0.3 mmol, 91.5 mg) and Ru(PPh<sub>3</sub>)<sub>3</sub>Cl<sub>2</sub> (5 mol%, 9.6 mg) in DCE (1 mL) afforded *p*-3c and *o*-3c as a white solid after purification on silica gel (isohexane/EA = 10/1 to 5/1). Reaction time: 18 h.

#### ***N*-(4-methoxybenzyl)benzamide**

**Yield:** 25 mg (0.10 mmol, 51%).

**Physical State:** white solid.

**R<sub>f</sub> Value:** 0.15 (isohexane/EtOAc – 5/1).

**<sup>1</sup>H NMR** (300 MHz, CDCl<sub>3</sub>)  $\delta$  7.81 – 7.74 (m, 2H), 7.48 (dd, *J* = 5.0, 3.6 Hz, 1H), 7.45 – 7.38 (m, 2H), 7.31 – 7.26 (m, 2H), 6.92 – 6.86 (m, 2H), 6.36 (s, 1H), 4.58 (d, *J* = 5.6 Hz, 2H), 3.80 (s, 3H).

**<sup>13</sup>C NMR** (75 MHz, CDCl<sub>3</sub>)  $\delta$  167.38, 159.28, 134.60, 131.64, 130.38, 129.46, 128.72, 127.06, 114.31, 55.46, 43.79.

**IR** (ATR in CDCl<sub>3</sub>)  $\nu$ 3309 (s), 2929 (s), 2832 (s), 1640 (s), 1535 (s), 1300 (m), 1248 (s), 1032 (m), 831 (w), 697 (s) cm<sup>-1</sup>.

**HRMS** (ESI MS) calcd for C<sub>15</sub>H<sub>16</sub>NO<sub>2</sub> [M+H<sup>+</sup>]: 242.1176, found: 242.1181.

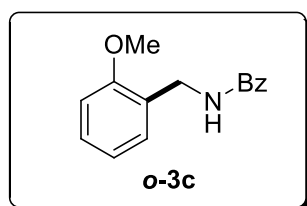

#### ***N*-(2-methoxybenzyl)benzamide**

**Yield:** 8 mg (0.04 mmol, 18%).

**Physical State:** white solid.

**R<sub>f</sub> Value:** 0.20 (isohexane/EtOAc – 5/1).

**<sup>1</sup>H NMR** (300 MHz, CDCl<sub>3</sub>) δ 7.79 – 7.74 (m, 2H), 7.50 – 7.34 (m, 4H), 7.30 (dd, *J* = 7.8, 1.7 Hz, 1H), 6.93 (dd, *J* = 14.4, 7.8 Hz, 2H), 6.64 (s, 1H), 4.65 (d, *J* = 5.8 Hz, 2H), 3.89 (s, 3H).

**<sup>13</sup>C NMR** (75 MHz, CDCl<sub>3</sub>) δ 157.83, 134.98, 131.45, 130.20, 129.15, 128.66, 127.07, 126.31, 120.97, 110.54, 55.57, 40.21.

**IR** (ATR in CDCl<sub>3</sub>) ν<sub>3309</sub> (s), 2929 (s), 2834 (s), 1640 (s), 1535 (s), 1330 (m), 1156 (s), 1036 (m), 868 (w), 693 (s) cm<sup>-1</sup>.

**HRMS** (ESI MS) calcd for C<sub>15</sub>H<sub>15</sub>NO<sub>2</sub> [M+H<sup>+</sup>]: 242.1176, found: 242.1178.

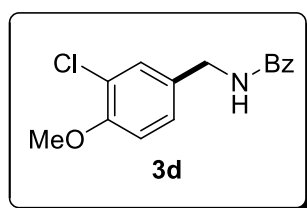

According to GP-3, 2-chloroanisole (0.2 mmol, 28.4 mg), *N*-methyl-*N*-(tosyloxy)benzamide (0.3 mmol, 91.5 mg) and Ru(PPh<sub>3</sub>)<sub>3</sub>Cl<sub>2</sub> (5 mol%, 9.6 mg) in DCE (1 mL) afforded **3d** as a white solid after purification on silica gel (isohexane/EA = 10/1 to 5/1). Reaction time: 18 h.

#### ***N*-(3-chloro-4-methoxybenzyl)benzamide**

**Yield:** 51 mg (0.18 mmol, 93%).

**Physical State:** white solid.

**R<sub>f</sub> Value:** 0.11 (isohexane/EtOAc – 5/1).

**<sup>1</sup>H NMR** (300 MHz, CDCl<sub>3</sub>) δ 7.78 (dd, *J* = 5.2, 3.3 Hz, 2H), 7.52 – 7.45 (m, 1H), 7.44 – 7.36 (m, 2H), 7.33 (d, *J* = 2.1 Hz, 1H), 7.18 (dd, *J* = 8.4, 2.1 Hz, 1H), 6.85 (d, *J* = 8.4 Hz, 1H), 6.73 (s, 1H), 4.51 (d, *J* = 5.8 Hz, 2H), 3.86 (s, 3H).

**<sup>13</sup>C NMR** (75 MHz, CDCl<sub>3</sub>) δ 167.55, 154.47, 134.25, 131.72, 131.57, 129.81, 128.68, 127.47, 127.11, 122.60, 112.26, 77.58, 77.16, 76.74, 56.29, 43.14.

**IR** (ATR in CDCl<sub>3</sub>) ν<sub>3317</sub> (s), 2933 (m), 2840 (w), 1640 (s), 1535 (m), 1502 (s), 1282 (s), 1066 (m), 879 (w), 805 (w), 693 (s) cm<sup>-1</sup>.

**HRMS** (ESI MS) calcd for  $C_{15}H_{15}ClNO_2$  [ $M+H^+$ ]: 276.0791, found: 276.0790.

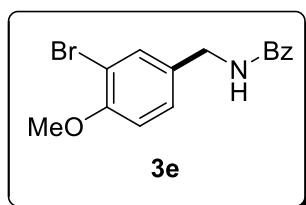

According to GP-3, 2-bromoanisole (0.2 mmol, 37.0 mg), *N*-methyl-*N*-(tosyloxy)benzamide (0.3 mmol, 91.5 mg) and  $Ru(PPh_3)_3Cl_2$  (5 mol%, 9.6 mg) in DCE (1 mL) afforded 3e as a brown solid after purification on silica gel (isohexane/EA = 10/1 to 5/1). Reaction time: 18 h.

#### ***N*-(3-bromo-4-methoxybenzyl)benzamide**

**Yield:** 51 mg (0.16 mmol, 81%).

**Physical State:** brown solid.

**R<sub>f</sub> Value:** 0.10 (isohexane/EtOAc – 5/1).

**<sup>1</sup>H NMR** (300 MHz,  $CDCl_3$ )  $\delta$  7.82 – 7.72 (m, 2H), 7.49 (dd,  $J = 7.9, 4.7$  Hz, 2H), 7.44 – 7.37 (m, 2H), 7.27 – 7.19 (m, 1H), 6.82 (d,  $J = 8.4$  Hz, 1H), 6.71 (s, 1H), 4.52 (d,  $J = 5.8$  Hz, 2H), 3.85 (s, 3H).

**<sup>13</sup>C NMR** (75 MHz,  $CDCl_3$ )  $\delta$  167.52, 155.38, 134.25, 132.89, 132.03, 131.73, 128.69, 128.30, 127.11, 112.11, 77.58, 77.16, 76.74, 56.39, 43.05.

**IR** (ATR in  $CDCl_3$ )  $\nu$ 3313 (s), 2937 (s), 2836 (m), 1640 (s), 1535 (s), 1494 (s), 1256 (s), 1054 (s), 1021 (s), 711 (s)  $cm^{-1}$ .

**HRMS** (ESI MS) calcd for  $C_{15}H_{15}BrNO_2$  [ $M+H^+$ ]: 320.0281, found: 320.0277.

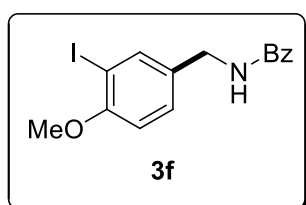

According to GP-3, 2-iodoanisole (0.2 mmol, 46.8 mg), *N*-methyl-*N*-(tosyloxy)benzamide (0.3 mmol, 91.5 mg) and  $Ru(PPh_3)_3Cl_2$  (5 mol%, 9.6 mg) in DCE (1 mL) afforded 3f as a yellow oil after purification on silica gel (isohexane/EA = 10/1 to 5/1). Reaction time: 18 h.

### ***N*-(3-iodo-4-methoxybenzyl)benzamide**

**Yield:** 41 mg (0.11 mmol, 56%).

**Physical State:** yellow oil.

**R<sub>f</sub> Value:** 0.10 (isohexane/EtOAc – 5/1).

**<sup>1</sup>H NMR** (300 MHz, CDCl<sub>3</sub>) δ 7.81 – 7.72 (m, 3H), 7.48 (d, *J* = 7.2 Hz, 1H), 7.44 – 7.38 (m, 2H), 7.30 (dd, *J* = 8.4, 2.1 Hz, 1H), 6.76 (d, *J* = 8.4 Hz, 1H), 6.60 (d, *J* = 19.1 Hz, 1H), 4.52 (d, *J* = 5.7 Hz, 2H), 3.85 (s, 3H).

**<sup>13</sup>C NMR** (75 MHz, CDCl<sub>3</sub>) δ 167.48, 157.71, 139.03, 134.29, 132.57, 131.73, 129.47, 128.71, 127.11, 111.06, 86.20, 56.55, 42.92.

**IR** (ATR in CDCl<sub>3</sub>) ν 3309 (s), 2937 (m), 2836 (w), 1636 (s), 1535 (m), 1487 (s), 1278 (s), 1047 (m), 883 (w), 805 (w), 708 (s) cm<sup>-1</sup>.

**HRMS** (ESI MS) calcd for C<sub>15</sub>H<sub>15</sub>INO<sub>2</sub> [M+H<sup>+</sup>]: 368.0142, found: 368.0143.

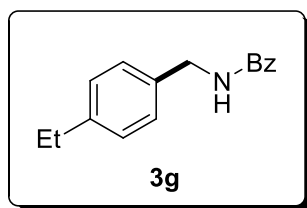

According to GP-3, ethylbenzene (0.2 mmol, 21.2 mg), *N*-methyl-*N*-(tosyloxy)benzamide (0.3 mmol, 91.5 mg) and Ru(PPh<sub>3</sub>)<sub>3</sub>Cl<sub>2</sub> (5 mol%, 9.6 mg) in DCE (1 mL) afforded 3g as a white solid after purification on silica gel (isohexane/EA = 10/1 to 5/1). Reaction time: 18 h.

### ***N*-(4-ethylbenzyl)benzamide**

**Yield:** 27 mg (0.11 mmol, 58%).

**Physical State:** white solid.

**R<sub>f</sub> Value:** 0.20 (isohexane/EtOAc – 5/1).

**<sup>1</sup>H NMR** (300 MHz, CDCl<sub>3</sub>) δ 7.82 – 7.72 (m, 2H), 7.52 – 7.47 (m, 1H), 7.47 – 7.38 (m, 2H), 7.28 (d, *J* = 8.1 Hz, 2H), 7.19 (d, *J* = 8.2 Hz, 2H), 6.35 (s, 1H), 4.62 (d, *J* = 5.5 Hz, 2H), 2.65 (q, *J* = 7.6 Hz, 2H), 1.24 (t, *J* = 7.6 Hz, 3H).

**<sup>13</sup>C NMR** (75 MHz, CDCl<sub>3</sub>) δ 167.41, 143.96, 135.49, 134.62, 131.64, 128.73, 128.45, 128.20, 127.07, 44.12, 28.69, 15.77.

**IR** (ATR in CDCl<sub>3</sub>)  $\nu$ 3308 (s), 2959 (s), 2199 (m), 1640 (s), 1539 (m), 1248 (w), 730 (m), 700 (w) cm<sup>-1</sup>.

**HRMS** (ESI MS) calcd for C<sub>16</sub>H<sub>18</sub>NO [M+H<sup>+</sup>]: 240.1388, found: 240.1389.

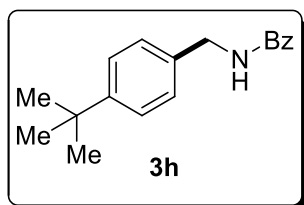

According to GP-3, *tert*-butylbenzene (0.2 mmol, 26.8 mg), *N*-methyl-*N*-(tosyloxy)benzamide (0.3 mmol, 91.5 mg) and Ru(PPh<sub>3</sub>)<sub>3</sub>Cl<sub>2</sub> (5 mol%, 9.6 mg) in DCE (1 mL) afforded 3h as a white solid after purification on silica gel (isohexane/EA = 10/1 to 5/1). Reaction time: 18 h.

#### ***N*-(4-(*tert*-butyl)benzyl)benzamide**

**Yield:** 39 mg (0.15 mmol, 74%).

**Physical State:** white solid.

**R<sub>f</sub> Value:** 0.21 (isohexane/EtOAc – 5/1).

**<sup>1</sup>H NMR** (300 MHz, CDCl<sub>3</sub>)  $\delta$  7.83 – 7.74 (m, 2H), 7.48 (dd, *J* = 5.0, 3.6 Hz, 1H), 7.46 – 7.35 (m, 4H), 7.30 (d, *J* = 8.4 Hz, 2H), 6.36 (s, 1H), 4.62 (d, *J* = 5.5 Hz, 2H), 1.32 (s, 9H).

**<sup>13</sup>C NMR** (75 MHz, CDCl<sub>3</sub>)  $\delta$  167.42, 150.86, 135.24, 134.61, 131.64, 128.72, 127.94, 127.08, 125.88, 44.02, 34.69, 31.47.

**IR** (ATR in CDCl<sub>3</sub>)  $\nu$ 3304 (s), 2939 (s), 1641 (s), 1439 (m), 1118 (w), 1069 (w), 737 (m), 716 (w) cm<sup>-1</sup>.

**HRMS** (ESI MS) calcd for C<sub>18</sub>H<sub>22</sub>NO [M+H<sup>+</sup>]: 268.1701, found: 268.1703.

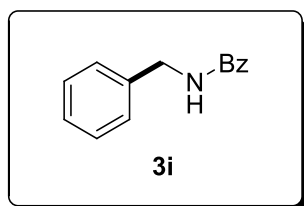



According to GP-3, *N*-methyl-*N*-(tosyloxy)benzamide (0.2 mmol, 61.0 mg) and Ru(PPh<sub>3</sub>)<sub>3</sub>Cl<sub>2</sub> (5 mol%, 9.6 mg) in benzene (1 mL) afforded 3i as a white solid after purification on silica gel (isohexane/EA = 10/1 to 5/1). Reaction time: 18 h.

### ***N*-benzylbenzamide**

**Yield:** 20 mg (0.08 mmol, 43%).

**Physical State:** white solid.

**R<sub>f</sub> Value:** 0.18 (isohexane/EtOAc – 5/1).

**<sup>1</sup>H NMR** (300 MHz, CDCl<sub>3</sub>) δ 7.83 – 7.76 (m, 2H), 7.53 – 7.47 (m, 1H), 7.46 – 7.40 (m, 2H), 7.40 – 7.28 (m, 5H), 6.38 (s, 1H), 4.66 (d, *J* = 5.7 Hz, 2H).

**<sup>13</sup>C NMR** (75 MHz, CDCl<sub>3</sub>) δ 167.47, 138.30, 134.55, 131.72, 128.97, 128.77, 128.10, 127.82, 127.09, 44.33.

**IR** (ATR in CDCl<sub>3</sub>) ν 3302 (s), 2967 (s), 1640 (s), 1539 (m), 1457 (w), 1300 (m), 712 (s), 700 (m) cm<sup>-1</sup>.

**HRMS** (ESI MS) calcd for C<sub>14</sub>H<sub>14</sub>NO [M+H<sup>+</sup>]: 212.1075, found: 212.1076.

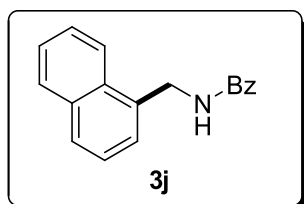

According to GP-3, naphthalene (0.2 mmol, 25.6 mg), *N*-methyl-*N*-(tosyloxy)benzamide (0.3 mmol, 91.5 mg) and Ru(PPh<sub>3</sub>)<sub>3</sub>Cl<sub>2</sub> (5 mol%, 9.6 mg) in DCE (1 mL) afforded 3j as a white solid after purification on silica gel (isohexane/EA = 10/1 to 5/1). Reaction time: 18 h.

### ***N*-(naphthalen-1-ylmethyl)benzamide**

**Yield:** 20 mg (0.08 mmol, 39%).

**Physical State:** white solid.

**R<sub>f</sub> Value:** 0.1 (isohexane/EtOAc – 5/1).

**<sup>1</sup>H NMR** (300 MHz, CDCl<sub>3</sub>) δ 8.13 – 8.04 (m, 1H), 7.92 – 7.82 (m, 2H), 7.75 (dd, *J* = 5.3, 3.3 Hz, 2H), 7.58 – 7.45 (m, 5H), 7.43 – 7.37 (m, 2H), 6.34 (s, 1H), 5.10 (d, *J* = 5.2 Hz, 2H).

**$^{13}\text{C}$  NMR** (75 MHz,  $\text{CDCl}_3$ )  $\delta$  167.29, 134.45, 134.09, 133.51, 131.70, 131.65, 128.97, 128.78, 128.73, 127.15, 127.10, 126.94, 126.23, 125.58, 123.67, 42.59.

**IR** (ATR in  $\text{CDCl}_3$ )  $\nu$ 3321 (s), 3063 (s) 2926 (m), 1640 (s), 1535 (s), 1293 (s), 1148 (w), 1028 (m), 805 (w), 745 (s)  $\text{cm}^{-1}$ .

**HRMS** (ESI MS) calcd for  $\text{C}_{18}\text{H}_{16}\text{NO}_2$  [ $\text{M}+\text{H}^+$ ]: 262.1232, found: 262.1233.

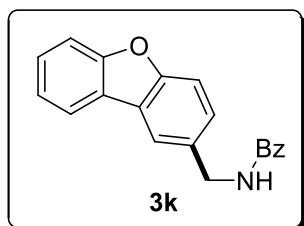

According to GP-3, dibenzofuran (0.2 mmol, 33.6 mg), *N*-methyl-*N*-(tosyloxy)benzamide (0.3 mmol, 91.5 mg) and  $\text{Ru}(\text{PPh}_3)_3\text{Cl}_2$  (5 mol%, 9.6 mg) in DCE (1 mL) afforded **3k** as a white solid after purification on silica gel (isohexane/EA = 10/1 to 5/1). Reaction time: 18 h.

#### ***N*-(dibenzo[b,d]furan-2-ylmethyl)benzamide**

**Yield:** 35 mg (0.11 mmol, 58%).

**Physical State:** white solid.

**R<sub>f</sub> Value:** 0.15 (isohexane/EtOAc – 5/1).

**$^1\text{H}$  NMR** (300 MHz,  $\text{CDCl}_3$ )  $\delta$  7.93 (d,  $J$  = 7.6 Hz, 2H), 7.85 – 7.80 (m, 2H), 7.58 – 7.42 (m, 7H), 7.34 (td,  $J$  = 7.6, 1.0 Hz, 1H), 6.57 (s, 1H), 4.79 (d,  $J$  = 5.7 Hz, 2H).

**$^{13}\text{C}$  NMR** (75 MHz,  $\text{CDCl}_3$ )  $\delta$  167.50, 156.72, 155.79, 134.47, 132.93, 131.76, 128.77, 127.52, 127.35, 127.13, 122.95, 120.90, 120.42, 111.98, 111.87, 44.36.

**IR** (ATR in  $\text{CDCl}_3$ )  $\nu$ 3324 (s), 3060 (m), 2926 (m), 1640 (s), 1449 (s), 1535 (s), 1483 (s), 1304 (m), 1196 (s), 1025 (m), 909 (m), 842 (m), 749 (s), 711 (w)  $\text{cm}^{-1}$ .

**HRMS** (ESI MS) calcd for  $\text{C}_{20}\text{H}_{16}\text{NO}_2$  [ $\text{M}+\text{H}^+$ ]: 302.1181, found: 302.1178.

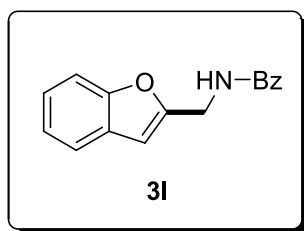

According to GP-3, benzofuran (0.2 mmol, 23.6 mg), *N*-methyl-*N*-(tosyloxy)benzamide (0.3 mmol, 91.5 mg) and Ru(PPh<sub>3</sub>)<sub>3</sub>Cl<sub>2</sub> (5 mol%, 9.6 mg) in DCE (1 mL) afforded 3l as a white solid after purification on silica gel (isohexane/EA = 10/1 to 5/1). Reaction time: 18 h.

***N*-(benzofuran-2-ylmethyl)benzamide**

**Yield:** 26 mg (0.10 mmol, 52%).

**Physical State:** white solid.

**R<sub>f</sub> Value:** 0.17 (isohexane/EtOAc – 5/1).

**<sup>1</sup>H NMR** (300 MHz, CDCl<sub>3</sub>) δ 7.85 – 7.76 (m, 2H), 7.56 – 7.48 (m, 2H), 7.47 – 7.41 (m, 3H), 7.30 – 7.18 (m, 2H), 6.69 (s, 1H), 6.56 (s, 1H), 4.80 (d, *J* = 5.1 Hz, 2H).

**<sup>13</sup>C NMR** (75 MHz, CDCl<sub>3</sub>) δ 167.43, 155.11, 153.99, 134.17, 131.91, 128.80, 128.37, 127.17, 124.42, 123.06, 121.19, 111.26, 104.60, 37.62.

**IR** (ATR in CDCl<sub>3</sub>) ν 3321 (s), 1640 (s), 1535 (s), 1487 (s), 1297 (m), 1177 (m), 939 (m), 808 (s), 697 (w) cm<sup>-1</sup>.

**HRMS** (ESI MS) calcd for C<sub>16</sub>H<sub>14</sub>NO<sub>2</sub> [M+H<sup>+</sup>]: 252.1019, found: 252.1025.

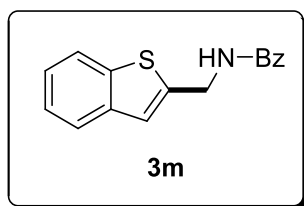

According to GP-3, benzothiophene (0.2 mmol, 26.8 mg), *N*-methyl-*N*-(tosyloxy)benzamide (0.3 mmol, 91.5 mg) and Ru(PPh<sub>3</sub>)<sub>3</sub>Cl<sub>2</sub> (5 mol%, 9.6 mg) in DCE (1 mL) afforded 3m as a yellow solid after purification on silica gel (isohexane/EA = 10/1 to 5/1). Reaction time: 18 h.

***N*-(benzothiophen-2-ylmethyl)benzamide**

**Yield:** 28 mg (0.11 mmol, 53%).

**Physical State:** yellow solid.

**R<sub>f</sub> Value:** 0.17 (isohexane/EtOAc – 5/1).

**<sup>1</sup>H NMR** (300 MHz, CDCl<sub>3</sub>) δ 7.93 – 7.83 (m, 2H), 7.80 – 7.72 (m, 2H), 7.48 (dd, *J* = 4.9, 3.6 Hz, 1H), 7.45 – 7.35 (m, 5H), 6.36 (s, 1H), 4.91 (d, *J* = 5.4 Hz, 2H).

**<sup>13</sup>C NMR** (75 MHz, CDCl<sub>3</sub>) δ 167.50, 140.84, 137.93, 134.37, 132.82, 131.79, 128.77, 127.09, 124.92, 124.87, 124.65, 123.13, 121.95, 38.21.

**IR** (ATR in CDCl<sub>3</sub>) ν 3309 (s), 3060 (m), 2926 (m), 1640 (s), 1535 (s), 1293 (s), 1159 (w), 760 (w), 693 (s) cm<sup>-1</sup>.

**HRMS** (ESI MS) calcd for C<sub>16</sub>H<sub>14</sub>NOS [M+H<sup>+</sup>]: 268.0796, found: 268.0794.

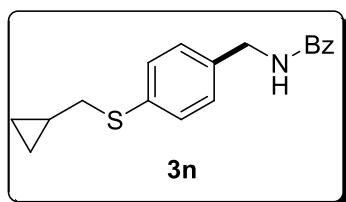

According to GP-3, cyclopropylmethyl phenyl sulfide (0.2 mmol, 32.8 mg), *N*-methyl-*N*-(tosyloxy)benzamide (0.3 mmol, 91.5 mg) and Ru(PPh<sub>3</sub>)<sub>3</sub>Cl<sub>2</sub> (5 mol%, 9.6 mg) in DCE (1 mL) afforded 3n as a yellow oil after purification on silica gel (isohexane/EA = 10/1 to 5/1). Reaction time: 18 h.

#### ***N*-(4-((cyclopropylmethyl)thio)benzyl)benzamide**

**Yield:** 39 mg (0.14 mmol, 69%).

**Physical State:** yellow oil.

**R<sub>f</sub> Value:** 0.16 (isohexane/EtOAc – 5/1).

**<sup>1</sup>H NMR** (300 MHz, CDCl<sub>3</sub>) δ 7.83 – 7.76 (m, 2H), 7.51 – 7.41 (m, 3H), 7.36 – 7.26 (m, 4H), 6.41 (s, 1H), 4.61 (d, *J* = 5.7 Hz, 2H), 2.85 (d, *J* = 7.0 Hz, 2H), 1.12 – 0.98 (m, 1H), 0.67 – 0.45 (m, 2H), 0.34 – 0.17 (m, 2H).

**<sup>13</sup>C NMR** (75 MHz, CDCl<sub>3</sub>) δ 167.46, 136.67, 136.01, 134.47, 131.74, 129.77, 128.76, 128.56, 127.08, 43.83, 39.78, 10.77, 5.77.

**IR** (ATR in CDCl<sub>3</sub>) ν 3309 (s), 3071 (m), 3004 (m), 2914 (m), 1640 (s), 1535 (s), 1289 (s), 1092 (m), 1017 (m), 827 (w), 793 (m), 693 (s) cm<sup>-1</sup>.

**HRMS** (ESI MS) calcd for C<sub>18</sub>H<sub>20</sub>NOS [M+H<sup>+</sup>]: 298.1266, found: 298.1267.

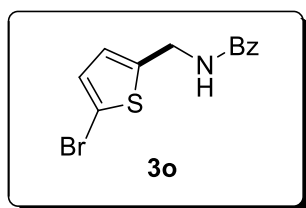

According to GP-3, 2-bromothiophene (0.2 mmol, 32.6 mg), *N*-methyl-*N*-(tosyloxy)benzamide (0.3 mmol, 91.5 mg) and Ru(PPh<sub>3</sub>)<sub>3</sub>Cl<sub>2</sub> (5 mol%, 9.6 mg) in DCE (1 mL) afforded 3o as a yellow solid after purification on silica gel (isohexane/EA = 10/1 to 5/1). Reaction time: 18 h.

***N*-((5-bromothiophen-2-yl)methyl)benzamide**

**Yield:** 39 mg (0.13 mmol, 67%).

**Physical State:** yellow solid.

**R<sub>f</sub> Value:** 0.16 (isohexane/EtOAc – 5/1).

**<sup>1</sup>H NMR** (300 MHz, CDCl<sub>3</sub>) δ 7.81 – 7.72 (m, 2H), 7.54 – 7.47 (m, 1H), 7.47 – 7.40 (m, 2H), 6.90 (d, *J* = 3.7 Hz, 1H), 6.79 (d, *J* = 3.7 Hz, 1H), 6.51 (s, 1H), 4.72 (d, *J* = 6.4 Hz, 2H).

**<sup>13</sup>C NMR** (75 MHz, CDCl<sub>3</sub>) δ 167.38, 142.78, 134.02, 131.95, 129.69, 128.80, 127.13, 126.68, 112.07, 39.17.

**IR** (ATR in CDCl<sub>3</sub>) ν 3328(s), 2922 (s), 2855 (m), 1641 (s), 1420 (m), 1222 (s), 1140 (m), 972 (m), 735 (w), 397 (m) cm<sup>-1</sup>.

**HRMS** (ESI MS) calcd for C<sub>12</sub>H<sub>11</sub>BrNOS [M+H<sup>+</sup>]: 295.9739, found: 295.9737.

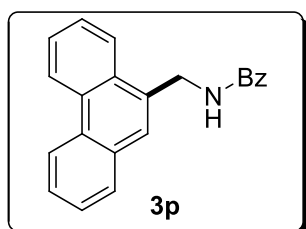

According to GP-3, phenanthrene (0.2 mmol, 35.6 mg), *N*-methyl-*N*-(tosyloxy)benzamide (0.3 mmol, 91.5 mg) and Ru(PPh<sub>3</sub>)<sub>3</sub>Cl<sub>2</sub> (5 mol%, 9.6 mg) in DCE (1 mL) afforded 3p as a white solid after purification on silica gel (isohexane/EA = 10/1 to 5/1). Reaction time: 18 h.

***N*-(phenanthren-9-ylmethyl)benzamide**

**Yield:** 40 mg (0.13 mmol, 64%).

**Physical State:** white solid.

**R<sub>f</sub> Value:** 0.11 (isohexane/EtOAc – 5/1).

**<sup>1</sup>H NMR** (300 MHz, CDCl<sub>3</sub>) δ 8.80 – 8.65 (m, 2H), 8.18 – 8.09 (m, 1H), 7.91 – 7.83 (m, 1H), 7.81 – 7.73 (m, 3H), 7.71 – 7.58 (m, 4H), 7.53 – 7.44 (m, 1H), 7.44 – 7.36 (m, 2H), 6.41 (s, 1H), 5.14 (d, *J* = 5.3 Hz, 2H).

**<sup>13</sup>C NMR** (75 MHz, CDCl<sub>3</sub>) δ 167.36, 134.43, 131.82, 131.73, 131.44, 131.04, 130.64, 130.42, 128.75, 128.68, 128.02, 127.39, 127.18, 127.12, 127.07, 126.94, 124.38, 123.47, 122.71, 43.03.

**IR** (ATR in CDCl<sub>3</sub>) ν 3313 (s), 3056 (s), 2922 (m), 1640 (s), 1535 (s), 1487 (m), 1297 (s), 1177 (w), 1073 (m), 790 (w), 693 (s) cm<sup>-1</sup>.

**HRMS** (ESI MS) calcd for C<sub>22</sub>H<sub>18</sub>NO<sub>2</sub> [M+H<sup>+</sup>]: 312.1383, found: 312.1385.

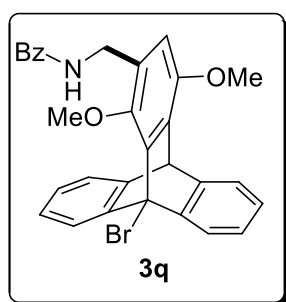

According to GP-3, triptycene (0.1 mmol, 39.2 mg), *N*-methyl-*N*-(tosyloxy)benzamide (0.15 mmol, 45.8 mg) and Ru(PPh<sub>3</sub>)<sub>3</sub>Cl<sub>2</sub> (5 mol%, 4.8 mg) in DCE (0.5 mL) afforded 3q as a white solid after purification on silica gel (isohexane/EA = 10/1 to 5/1). Reaction time: 18 h.

***N*-(((9<sub>r</sub>,10<sub>r</sub>)-9-bromo-1,4-dimethoxy-9,10-dihydro-9,10-[1,2]benzenoanthracen-2-yl)methyl)benzamide**

**Yield:** 35 mg (0.07 mmol, 66%).

**Physical State:** white solid.

**R<sub>f</sub> Value:** 0.31 (DCM/MeOH – 10/1).

**<sup>1</sup>H NMR** (600 MHz, CDCl<sub>3</sub>) δ 7.98 – 7.94 (m, 2H), 7.74 – 7.69 (m, 2H), 7.49 – 7.44 (m, 1H), 7.39 (ddd, *J* = 13.8, 7.2, 1.4 Hz, 4H), 7.13 – 7.05 (m, 4H), 6.72 (s, 1H), 6.56 (t, *J* = 5.2 Hz, 1H), 5.92 (s, 1H), 4.60 (d, *J* = 5.6 Hz, 2H), 3.82 (s, 3H), 3.77 (s, 3H).

**<sup>13</sup>C NMR** (151 MHz, CDCl<sub>3</sub>) δ 167.45, 150.03, 148.65, 145.16, 143.58, 137.03, 134.57, 134.45, 131.59, 130.67, 128.65, 127.10, 126.48, 125.50, 125.02, 123.33, 111.70, 65.93, 63.97, 56.27, 46.43, 39.81.

**IR** (ATR in CDCl<sub>3</sub>) ν 3309 (s), 3063 (m), 2937 (m), 2832 (w), 1640 (s), 1528 (m), 1468 (s), 1293 (m), 1226 (m), 1043 (m), 909 (m), 730 (s) cm<sup>-1</sup>.

**HRMS** (ESI MS) calcd for C<sub>30</sub>H<sub>25</sub>BrNO<sub>3</sub> [M+H<sup>+</sup>]: 526.1012, found: 526.1014.

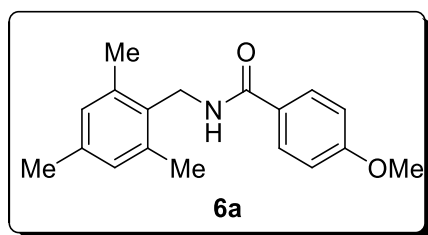

According to GP-3, mesitylene (0.2 mmol, 24.0 mg), 4-methoxy-*N*-methyl-*N*-(tosyloxy)benzamide (0.3 mmol, 100.5 mg) and Ru(PPh<sub>3</sub>)<sub>3</sub>Cl<sub>2</sub> (5 mol%, 9.6 mg) in DCE (1 mL) afforded 6a as a white solid after purification on silica gel (isohexane/EA = 10/1 to 5/1). Reaction time: 18 h.

#### **4-methoxy-*N*-(2,4,6-trimethylbenzyl)benzamide**

**Yield:** 50 mg (0.18 mmol, 91%).

**Physical State:** white solid.

**R<sub>f</sub> Value:** 0.24 (isohexane/EtOAc – 5/1).

**<sup>1</sup>H NMR** (300 MHz, CDCl<sub>3</sub>) δ 7.78 – 7.69 (m, 2H), 7.12 – 7.03 (m, 2H), 6.91 (s, 2H), 5.82 (s, 1H), 4.62 (d, *J* = 4.5 Hz, 2H), 2.37 (s, 6H), 2.29 (s, 3H).

**<sup>13</sup>C NMR** (75 MHz, CDCl<sub>3</sub>) δ 167.01, 162.29, 137.80, 137.76, 131.10, 129.37, 128.82, 126.76, 113.85, 55.53, 38.81, 21.06, 19.80.

**IR** (ATR in CDCl<sub>3</sub>) ν 3309 (s), 2948 (w), 1621 (s), 1528 (w), 1505 (m), 1312 (w), 1263 (s), 1028 (w), 835 (m), 717 (m) cm<sup>-1</sup>.

**HRMS** (ESI MS) calcd for C<sub>18</sub>H<sub>22</sub>NO<sub>2</sub> [M+H<sup>+</sup>]: 284.1651, found: 284.1670.

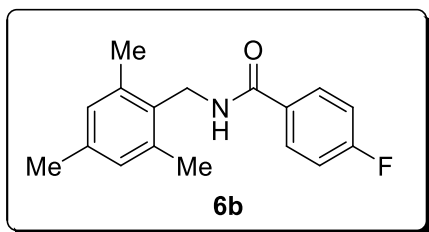

According to GP-3, mesitylene (0.2 mmol, 24.0 mg), 4-fluoro-*N*-methyl-*N*-(tosyloxy)benzamide (0.3 mmol, 96.9 mg) and Ru(PPh<sub>3</sub>)<sub>3</sub>Cl<sub>2</sub> (5 mol%, 9.6 mg) in DCE (1 mL) afforded **6b** as a white solid after purification on silica gel (isohexane/EA = 10/1 to 5/1). Reaction time: 18 h.

#### 4-fluoro-*N*-(2,4,6-trimethylbenzyl)benzamide

**Yield:** 27 mg (0.1 mmol, 50%).

**Physical State:** white solid.

**R<sub>f</sub> Value:** 0.26 (isohexane/EtOAc – 5/1).

**<sup>1</sup>H NMR** (300 MHz, CDCl<sub>3</sub>) δ 7.78 – 7.69 (m, 2H), 7.12 – 7.03 (m, 2H), 6.91 (s, 2H), 5.82 (s, 1H), 4.62 (d, *J* = 4.5 Hz, 2H), 2.37 (s, 6H), 2.29 (s, 3H).

**<sup>13</sup>C NMR** (75 MHz, CDCl<sub>3</sub>) δ 166.43, 164.86 (d, *J* = 249.7 Hz), 137.97, 137.72, 130.80, 129.44, 129.41, 129.29, 115.73 (d, *J* = 21.7 Hz), 38.93, 21.07, 19.80.

**<sup>19</sup>F{<sup>1</sup>H} NMR** (282 MHz, CDCl<sub>3</sub>) δ -108.89.

**IR** (ATR in CDCl<sub>3</sub>) ν 3268 (s), 2948 (w), 2914 (m), 1632 (s), 1546 (w), 1502 (s), 1304 (w), 1226 (s), 1155 (w), 909 (s), 849 (s), 738 (m) cm<sup>-1</sup>.

**HRMS** (ESI MS) calcd for C<sub>17</sub>H<sub>19</sub>FNO [M+H<sup>+</sup>]: 272.1451, found: 272.1449.

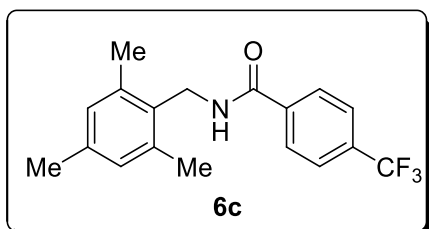

According to GP-3, mesitylene (0.2 mmol, 24.0 mg), 4-trifluoromethyl-*N*-methyl-*N*-(tosyloxy)benzamide (0.3 mmol, 100.5 mg) and Ru(PPh<sub>3</sub>)<sub>3</sub>Cl<sub>2</sub> (5 mol%, 9.6 mg) in DCE (1 mL)



afforded 6c as a yellow oil after purification on silica gel (isohexane/EA = 10/1 to 5/1). Reaction time: 18 h.

**4-(trifluoromethyl)-N-(2,4,6-trimethylbenzyl)benzamide**

**Yield:** 23 mg (0.07 mmol, 36%).

**Physical State:** yellow oil.

**R<sub>f</sub> Value:** 0.26 (isohexane/EtOAc – 5/1).

**<sup>1</sup>H NMR** (300 MHz, CDCl<sub>3</sub>) δ 7.84 (d, *J* = 8.1 Hz, 2H), 7.67 (d, *J* = 8.2 Hz, 2H), 6.92 (s, 2H), 5.94 (s, 1H), 4.64 (d, *J* = 4.6 Hz, 2H), 2.37 (s, 6H), 2.29 (s, 3H).

**<sup>13</sup>C NMR** (75 MHz, CDCl<sub>3</sub>) δ 166.17, 138.10, 137.72, 133.36 (q, *J* = 32.8 Hz), 130.51, 129.69, 129.48, 127.54, 125.75 (q, *J* = 3.8 Hz), 123.77 (q, *J* = 270.7 Hz), 39.03, 21.06, 19.81.

**<sup>19</sup>F{<sup>1</sup>H}NMR** (282 MHz, CDCl<sub>3</sub>) δ -62.96.

**IR** (ATR in CDCl<sub>3</sub>) ν 3308 (s), 2949(w), 2904 (m), 1639 (s), 1584 (w), 1432 (s), 1321 (w), 1066 (w), 913 (s), 837 (w), 752 (m) cm<sup>-1</sup>.

**HRMS** (ESI MS) calcd for C<sub>18</sub>H<sub>19</sub>F<sub>3</sub>NO [M+H<sup>+</sup>]: 322.1419, found: 322.1418.

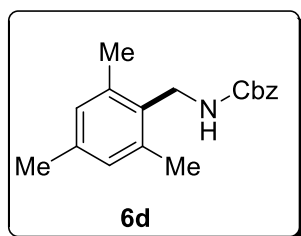

According to GP-3, mesitylene (0.2 mmol, 24.0 mg), benzyl methyl(tosyloxy)carbamate (0.3 mmol, 100.5 mg) and Ru(PPh<sub>3</sub>)<sub>3</sub>Cl<sub>2</sub> (5 mol%, 9.6 mg) in DCE (1 mL) afforded 6d as a white solid after purification on silica gel (isohexane/EA = 10/1 to 5/1). Reaction time: 18 h.

**benzyl (2,4,6-trimethylbenzyl)carbamate**

**Yield:** 28 mg (0.1 mmol, 49%).

**Physical State:** white solid.

**R<sub>f</sub> Value:** 0.45 (isohexane/EtOAc – 5/1).

**<sup>1</sup>H NMR** (300 MHz, CDCl<sub>3</sub>) δ 7.37 – 7.30 (m, 5H), 6.86 (s, 2H), 5.12 (s, 2H), 4.60 (s, 1H), 4.39 (d, *J* = 4.8 Hz, 2H), 2.33 (s, 6H), 2.26 (s, 3H).

$^{13}\text{C NMR}$  (75 MHz,  $\text{CDCl}_3$ )  $\delta$  156.27, 137.69, 137.42, 136.72, 131.09, 129.32, 128.66, 128.25, 128.21, 66.87, 39.49, 21.04, 19.71.

**IR** (ATR in  $\text{CDCl}_3$ )  $\nu$ 3317 (s), 2922 (s), 1681 (s), 1524 (s), 1353 (m), 1284 (s), 1047 (m), 853 (s)  $\text{cm}^{-1}$ .

**HRMS** (ESI MS) calcd for  $\text{C}_{18}\text{H}_{22}\text{NO}_2$  [ $\text{M}+\text{H}^+$ ]: 284.1651, found: 284.1654.

### 3.4. General procedure (GP-4) for preparation of 8-1, 9-1

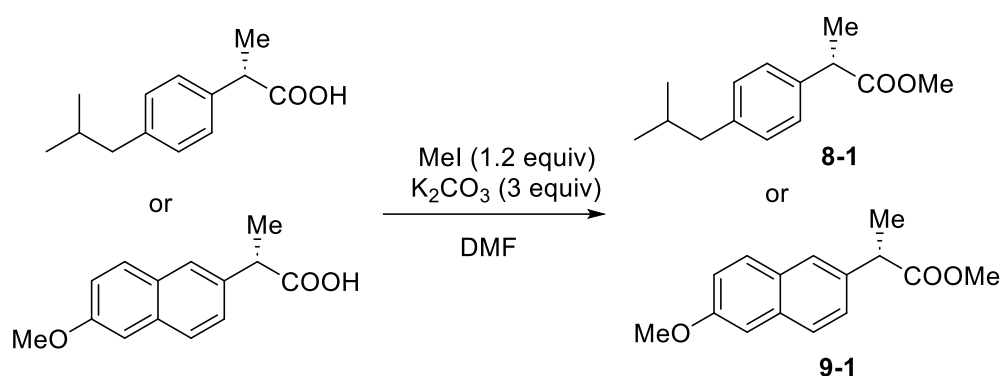

MeI (0.51 g, 3.6 mmol, 1.2 equiv) was added to a solution of S(+)-Ibuprofen (618 mg, 3 mmol) or S(+)-Naproxen (690 mg, 3 mmol) and  $\text{K}_2\text{CO}_3$  (1.24 g, 9 mmol, 3 equiv) in DMF (10 mL) at room temperature. The mixture was allowed to stir overnight at room temperature. After pouring 10 mL of water, the mixture was extracted by EtOAc (10 mL  $\times$  3). The combined organic layer was washed by brine and dried over anhydrous  $\text{Na}_2\text{SO}_4$ . The residue was purified by silica gel chromatography using isohexane/EtOAc = (10/1) to obtain pure product **8-1**.<sup>[3]</sup>

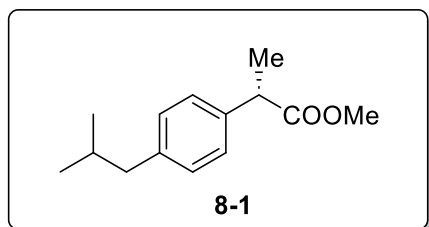

**methyl (S)-2-(4-isobutylphenyl)propanoate**

**Yield:** 646 mg (2.94 mmol, 98%).

**Physical State:** colorless oil.

**R<sub>f</sub> Value:** 0.35 (isohexane/EtOAc – 5/1).

**<sup>1</sup>H NMR** (300 MHz, CDCl<sub>3</sub>) δ 7.90 – 7.77 (m, 2H), 7.56 – 7.40 (m, 3H), 7.27 (td, *J* = 7.3, 2.4 Hz, 3H), 7.20 – 7.13 (m, 2H), 7.00 (d, *J* = 8.6 Hz, 1H), 6.93 – 6.79 (m, 3H), 2.32 (s, 6H), 2.29 (s, 3H).

**<sup>13</sup>C NMR** (75 MHz, CDCl<sub>3</sub>) δ 175.32, 140.66, 137.87, 129.46, 127.24, 52.06, 45.16, 45.13, 30.29, 22.50, 18.73.

**IR** (ATR in CDCl<sub>3</sub>) ν<sub>2952</sub> (s), 2870 (m), 1736 (s), 1461 (m), 1334 (m), 1207 (s), 1161 (s), 1069 (m), 857 (m), 797 (m) cm<sup>-1</sup>.

**HRMS** (ESI MS) calcd for C<sub>14</sub>H<sub>21</sub>O<sub>2</sub> [M+H<sup>+</sup>]: 221.1536, found: 221.1542.

**Enantiomer ratio was determined by HPLC** using a Daicel Chiralpak OJ column (flow rate 0.8 mL/min, *n*-hexane/*i*-PrOH = 99.9/0.1, λ = 230.4 nm), *t*<sub>R</sub> = 11.76 min (major), *t*<sub>R</sub> = 12.89 min (minor); 98% *ee*.

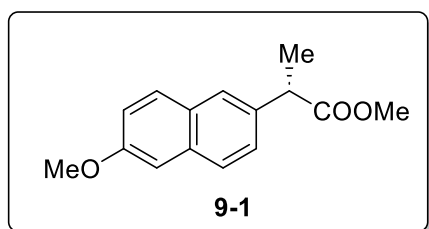

**methyl (S)-2-(6-methoxynaphthalen-2-yl)propanoate**

**Yield:** 577 mg (2.36 mmol, 79%).

**Physical State:** white solid.

**R<sub>f</sub> Value:** 0.55 (isohexane/EtOAc – 5/1).

**<sup>1</sup>H NMR** (300 MHz, CDCl<sub>3</sub>) δ 7.69 (dd, *J* = 12.1, 5.1 Hz, 3H), 7.41 (dd, *J* = 8.5, 1.7 Hz, 1H), 7.14 (dt, *J* = 7.0, 2.4 Hz, 2H), 3.91 (d, *J* = 4.1 Hz, 3H), 3.90 – 3.83 (m, 1H), 3.67 (s, 3H), 1.58 (d, *J* = 7.2 Hz, 3H).

**<sup>13</sup>C NMR** (75 MHz, CDCl<sub>3</sub>) δ 175.27, 157.77, 135.80, 133.82, 129.40, 129.05, 127.30, 126.31, 126.06, 119.12, 105.70, 55.42, 52.17, 45.47, 18.72.

**IR** (ATR in CDCl<sub>3</sub>) ν<sub>2985</sub> (m), 2940 (m), 1736 (s), 1602 (s), 1438 (s), 1267 (m), 1174 (s), 1028 (m), 857 (m), 823 (s) cm<sup>-1</sup>.

**HRMS** (ESI MS) calcd for C<sub>15</sub>H<sub>17</sub>O<sub>3</sub> [M+H<sup>+</sup>]: 245.1172, found: 245.1178.

**Enantiomer ratio was determined by HPLC** using a Daicel Chiralpak OD-H column (flow rate 1.0 mL/min, *n*-hexane/*i*-PrOH = 99.0/1.0,  $\lambda = 230.4$  nm),  $t_R = 9.25$  min (minor),  $t_R = 10.96$  min (major); 99% *ee*.

### 3.5. Preparation of 10-1

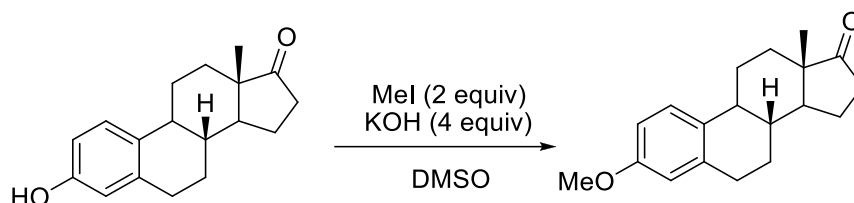

Add estrone (568 mg, 2 mmol) and MeI (6.85 mL, 110 mmol) to a solution of KOH (448 mg, 8 mmol) in DMSO (3.6 mL) at room temperature. Stir the reaction mixture at room temperature for 3 hours. Filter the reaction mixture. Wash the reaction mixture with water to obtain (8*R*,9*S*,13*S*,14*S*)-3-methoxy-13-methyl-7,8,9,11,12,13,15,16-octahydro-6*H*-cyclopenta[*a*]-phenanthren-17(14*H*)-one **10-1**.<sup>[4]</sup>

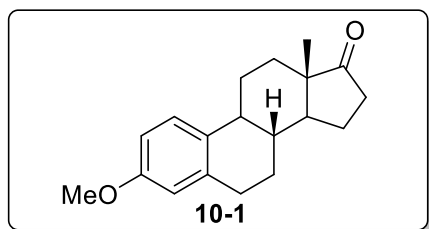

**(8*R*,13*S*)-3-methoxy-13-methyl-6,7,8,9,11,12,13,14,15,16-decahydro-17*H*-cyclopenta[*a*]-phenanthren-17-one**

**Yield:** 511 mg (0.18 mmol, 92%).

**Physical State:** white solid.

**R<sub>f</sub> Value:** 0.32 (isohexane/EtOAc – 5/1).

**<sup>1</sup>H NMR** (300 MHz, CDCl<sub>3</sub>)  $\delta$  7.21 (d,  $J = 8.5$  Hz, 1H), 6.74 – 6.59 (m, 2H), 3.78 (s, 3H), 2.93 – 2.86 (m, 2H), 2.55 – 2.37 (m, 2H), 2.25 – 2.18 (m, 1H), 2.08 – 1.95 (m, 3H), 1.65 – 1.42 (m, 7H), 0.91 (s, 3H).

**<sup>13</sup>C NMR** (75 MHz, CDCl<sub>3</sub>)  $\delta$  221.25, 157.70, 137.87, 132.14, 126.47, 114.00, 111.69, 77.58, 77.16, 76.74, 55.34, 50.52, 48.16, 44.09, 38.49, 36.01, 31.69, 29.79, 26.67, 26.05, 21.71, 13.98.

**IR** (ATR in CDCl<sub>3</sub>)  $\nu$ 2926 (s), 2858 (m), 1736 (s), 1610 (m), 1498 (s), 1282 (m), 1054 (m), 868 (w), 816 (m), 782 (m), 730 (m) cm<sup>-1</sup>.

**HRMS** (ESI MS) calcd for C<sub>19</sub>H<sub>25</sub>O<sub>2</sub> [M+H<sup>+</sup>]: 285.1855, found: 285.1661.

### 3.6. Preparation of 11-a

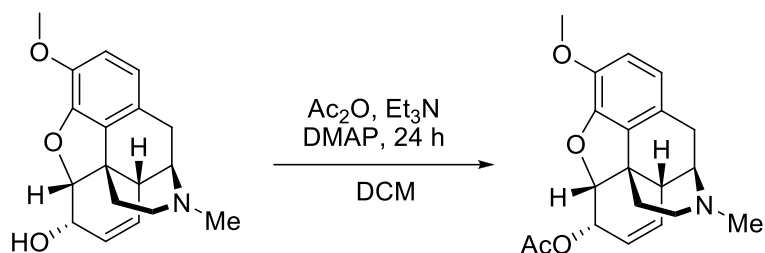

To a mixture of Codeine hydrochloride salt (0.3 g, 1.0 mmol) and dimethylaminopyridine (DMAP, 0.244 g, 2.0 mmol, 2.0 equiv) in dry DCM (10.5 mL) at rt were added triethylamine (0.41 mL, 3 mmol, 3.0 equiv) and Ac<sub>2</sub>O (0.28 mL, 3.0 mmol, 3.0 equiv) respectively. The resulting solution was stirred for 24 h, then poured into half saturated brine (20 mL), and extracted with DCM (3 × 10 mL). The combined organic extracts was dried over anhydrous Na<sub>2</sub>SO<sub>4</sub>, decanted and concentrated by rotary evaporation. The residue was purified by silica gel chromatography using DCM/MeOH = (20/1 to 10/1) to obtain pure product.<sup>[5]</sup>

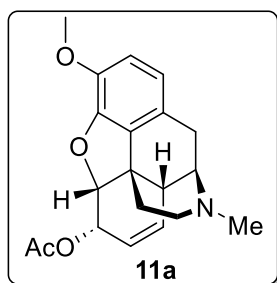

#### ***N*-((4-oxo-2-phenylchroman-6-yl)methyl)benzamide**

**Yield:** 220 mg (0.6 mmol, 65%).

**Physical State:** light yellow solid.

**R<sub>f</sub> Value:** 0.50 (DCM/MeOH – 10/1).

**<sup>1</sup>H NMR** (300 MHz, CDCl<sub>3</sub>)  $\delta$  6.65 (d, *J* = 8.2 Hz, 1H), 6.53 (d, *J* = 8.2 Hz, 1H), 5.69 – 5.57 (m, 1H), 5.47 – 5.37 (m, 1H), 5.18 (ddd, *J* = 8.2, 5.2, 2.8 Hz, 1H), 5.11 – 5.01 (m, 1H), 3.84 (s, 3H), 3.36 (dd, *J* = 5.9, 3.3 Hz, 1H), 3.03 (d, *J* = 18.6 Hz, 1H), 2.79 – 2.68 (m, 1H), 2.59 (dd, *J* = 12.2, 3.8 Hz, 1H), 2.43 (d, *J* = 5.1 Hz, 3H), 2.41 – 2.23 (m, 2H), 2.15 (s, 3H), 2.05 (td, *J* = 12.3, 5.1 Hz, 1H), 1.86 (dd, *J* = 12.6, 1.8 Hz, 1H).

$^{13}\text{C}$  NMR (75 MHz,  $\text{CDCl}_3$ )  $\delta$  170.71, 146.87, 142.24, 130.71, 129.71, 128.55, 127.07, 119.25, 113.90, 88.22, 59.17, 56.73, 46.77, 43.17, 42.87, 40.83, 35.49, 20.99, 20.46.

IR (ATR in  $\text{CDCl}_3$ )  $\nu$ 2914 (w), 2814 (w), 1750 (s), 1636 (s), 1435 (s), 1230 (s), 1170 (w), 1043 (s), 902 (m), 782 (m), 697 (m)  $\text{cm}^{-1}$ .

HRMS (ESI MS) calcd for  $\text{C}_{20}\text{H}_{24}\text{NO}_4$  [ $\text{M}+\text{H}^+$ ]: 342.1705, found: 342.1707.

### 3.7. Preparation of 7-11

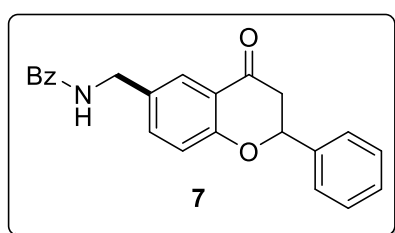

According to GP-3, flavanone (0.2 mmol, 44.8 mg), *N*-methyl-*N*-(tosyloxy)benzamide (0.3 mmol, 91.5 mg) and  $\text{Ru}(\text{PPh}_3)_3\text{Cl}_2$  (5 mol%, 9.6 mg) in DCE (1 mL) afforded **7** after purification on silica gel (isohexane/EA = 10/1 to 5/1). Reaction time: 18 h.

#### *N*-((4-oxo-2-phenylchroman-6-yl)methyl)benzamide

**Yield:** 20 mg (0.06 mmol, 29%).

**Physical State:** yellow solid.

**R<sub>f</sub> Value:** 0.40 (isohexane/EtOAc – 1/1).

$^1\text{H}$  NMR (300 MHz,  $\text{CDCl}_3$ )  $\delta$  7.88 (d,  $J$  = 2.3 Hz, 1H), 7.79 (dd,  $J$  = 5.3, 3.3 Hz, 2H), 7.58 – 7.41 (m, 9H), 7.06 (d,  $J$  = 8.5 Hz, 1H), 6.52 (s, 1H), 5.47 (dd,  $J$  = 13.1, 3.1 Hz, 1H), 4.63 (d,  $J$  = 5.8 Hz, 2H), 3.08 (dd,  $J$  = 16.9, 13.1 Hz, 1H), 2.89 (dd,  $J$  = 16.9, 3.1 Hz, 1H).

$^{13}\text{C}$  NMR (75 MHz,  $\text{CDCl}_3$ )  $\delta$  191.97, 167.57, 161.17, 138.67, 136.35, 134.32, 131.94, 131.82, 129.02, 128.99, 128.78, 127.13, 126.29, 126.06, 120.86, 118.96, 79.81, 44.65, 43.38.

IR (ATR in  $\text{CDCl}_3$ )  $\nu$ 3354 (s), 2981 (s), 1692 (s), 1643 (s), 1539 (s), 1490 (s), 1297 (s), 1230 (s), 909 (m), 805 (w), 760 (w), 700 (s)  $\text{cm}^{-1}$ .

HRMS (ESI MS) calcd for  $\text{C}_{23}\text{H}_{20}\text{NO}_3$  [ $\text{M}+\text{H}^+$ ]: 358.1438, found: 358.1439.

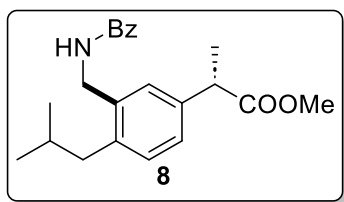

According to GP-3, S(+)-Ibuprofen methyl ester **8-1** (0.2 mmol, 44.0 mg), *N*-methyl-*N*-(tosyloxy)benzamide (0.3 mmol, 91.5 mg) and Ru(PPh<sub>3</sub>)<sub>3</sub>Cl<sub>2</sub> (5 mol%, 9.6 mg) in DCE (1 mL) afforded **8** as a colorless oil after purification on silica gel (isohexane/EA = 10/1 to 5/1). Reaction time: 18 h.

**methyl (S)-2-(3-(benzamidomethyl)-4-isobutylphenyl)propanoate**

**Yield:** 28 mg (0.08 mmol, 41%).

**Physical State:** colorless oil.

**R<sub>f</sub> Value:** 0.3 (isohexane/EtOAc – 3/1).

**<sup>1</sup>H NMR** (500 MHz, CDCl<sub>3</sub>) δ 7.77 (dd, *J* = 5.2, 3.4 Hz, 2H), 7.50 (ddd, *J* = 6.6, 3.8, 1.2 Hz, 1H), 7.43 (dd, *J* = 10.4, 4.7 Hz, 2H), 7.23 (d, *J* = 1.7 Hz, 1H), 7.19 (dd, *J* = 7.9, 1.9 Hz, 1H), 7.15 (d, *J* = 7.9 Hz, 1H), 6.17 (s, 1H), 4.65 (d, *J* = 5.2 Hz, 2H), 3.70 (q, *J* = 7.2 Hz, 1H), 3.66 (s, 3H), 2.53 (d, *J* = 7.2 Hz, 2H), 1.92 – 1.81 (m, 1H), 1.49 (d, *J* = 7.2 Hz, 3H), 0.93 (d, *J* = 6.6 Hz, 6H).

**<sup>13</sup>C NMR** (126 MHz, CDCl<sub>3</sub>) δ 175.17, 167.29, 139.33, 138.67, 136.02, 134.58, 131.68, 131.13, 128.77, 128.51, 127.07, 126.81, 52.20, 45.11, 42.01, 41.50, 30.10, 22.72, 18.76.

**IR** (ATR in CDCl<sub>3</sub>) ν 3317 (s), 2952 (s), 2870 (m), 1736 (s), 1640 (s), 1535 (s), 1289 (m), 1162 (m), 846 (w), 693 (m) cm<sup>-1</sup>.

**HRMS** (ESI MS) calcd for C<sub>22</sub>H<sub>28</sub>NO<sub>3</sub>[M+H<sup>+</sup>]: 354.2069, found: 354.2066.

**Enantiomer ratio was determined by HPLC** using a Daicel Chiralpak AS-H column (flow rate 1.0 mL/min, *n*-hexane/*i*-PrOH = 98.0/2.0, λ = 230.4 nm), *t*<sub>R</sub> = 118.70 min (minor), *t*<sub>R</sub> = 129.01 min (major); 99% *ee*.

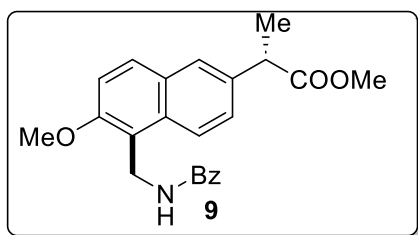

According to GP-3, S(+)-Naproxen methyl ester **9-1** (0.2 mmol, 48.8 mg), *N*-methyl-*N*-(tosyloxy)benzamide (0.3 mmol, 91.5 mg) and Ru(PPh<sub>3</sub>)<sub>3</sub>Cl<sub>2</sub> (5 mol%, 9.6 mg) in DCE (1 mL) afforded **9** as a white solid after purification on silica gel (isohexane/EA = 10/1 to 5/1). Reaction time: 18 h.

**methyl (S)-2-(5-(benzamidomethyl)-6-methoxynaphthalen-2-yl)propanoate**

**Yield:** 41 mg (0.11 mmol, 54%).

**Physical State:** white solid.

**R<sub>f</sub> Value:** 0.15 (isohexane/EtOAc – 5/1).

**<sup>1</sup>H NMR** (300 MHz, CDCl<sub>3</sub>) δ 8.17 (d, *J* = 8.9 Hz, 1H), 7.83 (d, *J* = 9.0 Hz, 1H), 7.74 – 7.70 (m, 3H), 7.49 – 7.32 (m, 5H), 6.37 (s, 1H), 5.12 (d, *J* = 5.3 Hz, 2H), 4.00 (s, 3H), 3.89 – 3.85 (m, 1H), 3.66 (s, 3H), 1.57 (d, *J* = 7.2 Hz, 3H).

**<sup>13</sup>C NMR** (75 MHz, CDCl<sub>3</sub>) δ 175.13, 167.31, 155.72, 136.03, 134.76, 132.17, 131.45, 130.06, 129.30, 128.61, 127.49, 127.09, 126.64, 124.02, 118.60, 113.29, 56.68, 52.23, 45.34, 34.68, 18.64.

**IR** (ATR in CDCl<sub>3</sub>) ν 3350 (s), 2974 (m), 2948 (s), 1840 (m), 1733 (s), 1643 (s), 1505 (s), 1457 (m), 1252 (s), 1162 (m), 1095 (w), 890 (m), 805 (w), 715 (s) cm<sup>-1</sup>.

**HRMS** (ESI MS) calcd for C<sub>23</sub>H<sub>24</sub>NO<sub>4</sub> [M+H<sup>+</sup>]: 378.1705, found: 378.1714.

**Enantiomer ratio was determined by HPLC** using a Daicel Chiralpak OD-H column (flow rate 1.0 mL/min, *n*-hexane/*i*-PrOH = 95.0/5.0, λ = 230.4 nm), *t<sub>R</sub>* = 52.09 min (minor), *t<sub>R</sub>* = 71.60 min (major); 79% *ee*.

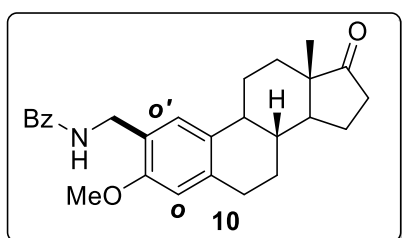



According to GP-3, methyl estrone (0.2 mmol, 56.8 mg), *N*-methyl-*N*-(tosyloxy)benzamide (0.3 mmol, 91.5 mg) and Ru(PPh<sub>3</sub>)<sub>3</sub>Cl<sub>2</sub> (5 mol%, 9.6 mg) in DCE (1 mL) afforded 3w as a white solid after purification on silica gel (isohexane/EA = 10/1 to 5/1). Reaction time: 18 h.

***N*-(((8*R*,13*S*)-3-methoxy-13-methyl-17-oxo-7,8,9,11,12,13,14,15,16,17-decahydro-6*H*-cyclopenta[*a*]phenanthren-2-yl)methyl)benzamide *o*-10 and *N*-(((8*R*,13*S*)-3-methoxy-13-methyl-17-oxo-7,8,9,11,12,13,14,15,16,17-decahydro-6*H*-cyclopenta[*a*]phenanthren-4-yl)methyl)benzamide *p*-10**

**Yield:** 58 mg (0.14 mmol, 71%).

**Physical State:** white solid.

**R<sub>f</sub> Value:** 0.30 (isohexane/EtOAc – 5/1).

**<sup>1</sup>H NMR** (300 MHz, CDCl<sub>3</sub>) δ 7.77 – 7.68 (m, 2H), 7.49 – 7.37 (m, 3H), 7.28 (s, 0.77H), 6.79 (d, *J* = 8.7 Hz, 0.23H), 6.65 - 6.60 (m, 1H), 4.71 (dd, *J* = 5.5, 4.1 Hz, 0.43H), 4.60 (dd, *J* = 5.7, 1.4 Hz, 1.57H), 3.88 (s, 0.70H), 3.86 (s, 2.30H), 3.05 – 2.83 (m, 2H), 2.54 – 2.41 (m, 2H), 2.16 – 1.93 (m, 4H), 1.67 – 1.37 (m, 7H), 0.93 – 0.87 (m, 3H).

**<sup>13</sup>C NMR** (75 MHz, CDCl<sub>3</sub>) δ 220.90, 167.12, 156.52, 155.91, 137.43, 136.92, 135.05, 134.88, 132.09, 131.40, 131.37, 128.60, 127.64, 127.04, 125.93, 124.28, 123.80, 111.02, 108.22, 55.75, 55.61, 50.55, 50.48, 48.13, 48.01, 44.44, 44.04, 40.31, 38.51, 37.64, 35.98, 35.57, 31.72, 31.68, 29.87, 26.72, 26.65, 26.09, 21.70, 13.98, 13.92.

**IR** (ATR in CDCl<sub>3</sub>) ν 3399 (s), 2929 (s), 2840 (m), 1736 (s), 1651 (m), 1505 (s), 1267 (m), 1088 (m), 861 (w), 678 (m) cm<sup>-1</sup>.

**HRMS** (ESI MS) calcd for C<sub>27</sub>H<sub>32</sub>NO<sub>3</sub> [M+H<sup>+</sup>]: 418.2382, found: 418.2389.

### 3.8. Procedure for preparation of 11

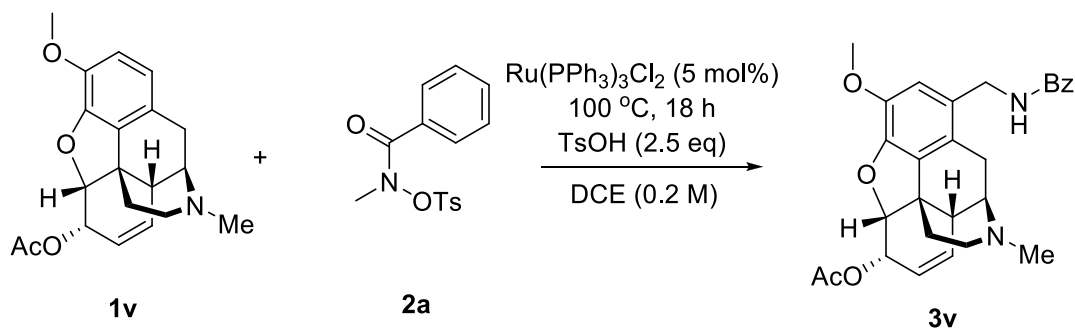

A mixture of codeine acetate **11-1** (0.1 mmol, 34.1 mg), *N*-methyl-*N*-(tosyloxy)benzamide (0.15 mmol, 45.8 mg) and Ru(PPh<sub>3</sub>)<sub>3</sub>Cl<sub>2</sub> (5 mol%, 4.8 mg) in DCE (0.5 mL) in a 15 mL sealed glass vial was heated at 100 °C under air with vigorous stirring for 18 hours. The reaction mixture was cooled to room temperature, and diluted with ethyl acetate and filtered through celite. The filtrate was concentrated *in vacuo* and purified by column chromatography on silica gel (DCM/MeOH – 20/1 to 10/1) to give the corresponding product **11**.

**methyl (S)-2-(5-(benzamidomethyl)-6-methoxynaphthalen-2-yl)propanoate**

**Yield:** 10 mg (0.02 mmol, 21%).

**Physical State:** white solid.

**R<sub>f</sub> Value:** 0.45 (DCM/MeOH – 10/1).

**<sup>1</sup>H NMR** (300 MHz, CDCl<sub>3</sub>) δ 7.80 – 7.72 (m, 2H), 7.55 – 7.48 (m, 1H), 7.47 – 7.39 (m, 2H), 6.68 (s, 1H), 6.16 (s, 1H), 5.65 (d, *J* = 10.0 Hz, 1H), 5.49 – 5.39 (m, 1H), 5.19 (dt, *J* = 5.1, 2.8 Hz, 1H), 5.09 (d, *J* = 6.1 Hz, 1H), 4.62 (dd, *J* = 14.5, 5.8 Hz, 1H), 4.43 (dd, *J* = 14.5, 4.9 Hz, 1H), 3.86 (s, 3H), 3.43 – 3.31 (m, 1H), 3.06 (d, *J* = 18.6 Hz, 1H), 2.78 (s, 1H), 2.66 – 2.58 (m, 1H), 2.41 (s, 3H), 2.27 (dd, *J* = 18.8, 6.6 Hz, 2H), 2.15 (s, 3H), 1.85 (d, *J* = 10.9 Hz, 2H).

**<sup>13</sup>C NMR** (151 MHz, CDCl<sub>3</sub>) δ 170.69, 167.31, 146.51, 142.29, 134.45, 131.78, 131.52, 129.54, 128.83, 127.47, 127.00, 114.83, 88.20, 68.10, 59.00, 56.94, 46.89, 43.17, 42.82, 41.15, 40.32, 40.30, 35.34, 20.97, 18.67.

**IR** (ATR in CDCl<sub>3</sub>) ν 3309 (s), 2937 (m), 1733 (m), 1636 (s), 1505 (s), 1446 (m), 1371 (s), 1241 (s), 1121 (w), 1054 (w), 909 (m), 697 (s), 667 (s) cm<sup>-1</sup>.

**HRMS** (ESI MS) calcd for C<sub>28</sub>H<sub>31</sub>N<sub>2</sub>O<sub>5</sub> [M+H<sup>+</sup>]: 475.2233, found: 475.2230

### 3.9. Scale-up reaction

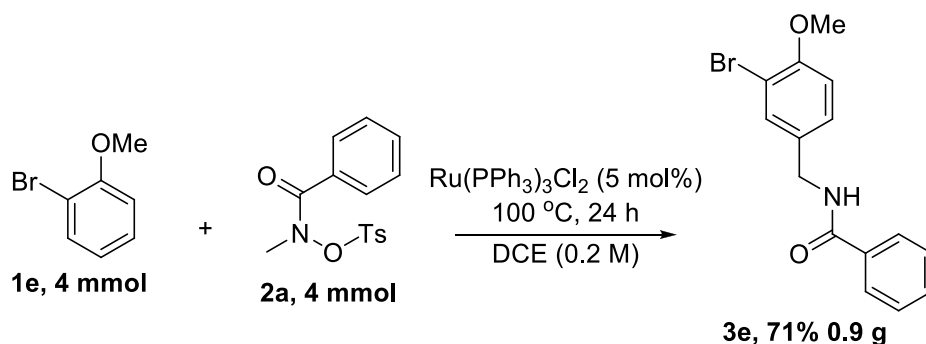

A mixture of **1e** (0.74 g, 4.0 mmol, 1.0 equiv), *N*-benzoyl-*O*-tosyl-*N*-methylhydroxylamine **2a** (1.2 g, 4.0 mmol, 1.0 equiv), Ru(PPh<sub>3</sub>)<sub>3</sub>Cl<sub>2</sub> (191 mg, 0.2 mmol, 5 mol%), and 20 mL DCE in a 100 mL sealed high-pressure glass tube was heated at 100 °C under air with vigorous stirring for 24 hours. The reaction mixture was cooled to room temperature, diluted with ethyl acetate, and filtered through celite. The filtrate was concentrated *in vacuo* and purified by column chromatography on silica gel (isohexane/EA = 10/1 to 5/1) to give the product.

### 3.10. Further transformation-Heck reaction

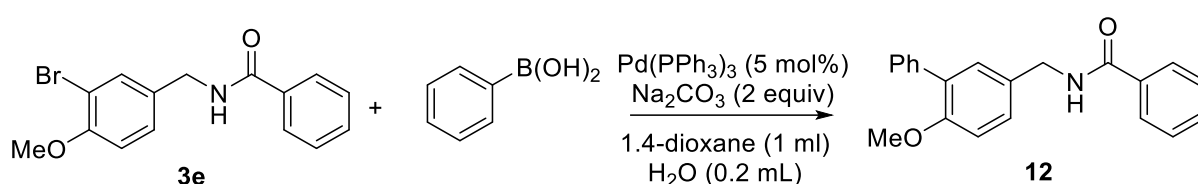

An argon-flooded Schlenk tube containing phenylboronic acid (29.2 mg, 0.24 mmol, 1.2 equiv) in dry 1.4-dioxane (1 mL) was charged with sodium carbonate (42.4 mg, 0.4 mmol, 2 equiv), deionized water (0.4 mL) the *N*-(3-bromo-4-methoxybenzyl)benzamide **3e** (63.8 mg, 0.2 mmol, 1 equiv), and Pd(PPh<sub>3</sub>)<sub>4</sub> (11.6 mg, 0.01 mmol, 0.05 equiv). After refluxing for 18 h, the crude mixture was cooled to room temperature and filtered through a short pad of celite. After the addition of brine (50 mL) and extraction with toluene (3 x 50 mL) the organic phase was dried with MgSO<sub>4</sub> and concentrated under reduced pressure. The residue was purified by flash chromatography on silica gel (EtOAc/isohexane = 1:7) to provide the product.<sup>[6]</sup>

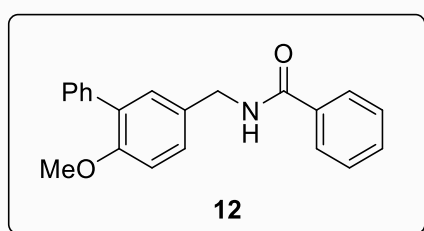

**N-((6-methoxy-[1,1'-biphenyl]-3-yl)methyl)benzamide**

**Yield:** 59 mg (0.19 mmol, 94%).

**Physical State:** white solid.

**R<sub>f</sub> Value:** 0.27 (isohexane/EtOAc – 5/1).

**<sup>1</sup>H NMR** (300 MHz, CDCl<sub>3</sub>) δ 7.82 – 7.73 (m, 2H), 7.55 – 7.46 (m, 3H), 7.44 – 7.37 (m, 4H), 7.36 – 7.29 (m, 3H), 6.96 (d, *J* = 8.7 Hz, 1H), 6.51 (s, 1H), 4.62 (d, *J* = 5.6 Hz, 2H), 3.80 (s, 3H).

**<sup>13</sup>C NMR** (75 MHz, CDCl<sub>3</sub>) δ 167.39, 156.13, 138.23, 134.55, 131.60, 131.15, 130.79, 130.56, 129.59, 128.67, 128.44, 128.16, 127.23, 127.08, 111.65, 55.84, 43.78.

**IR** (ATR in CDCl<sub>3</sub>) ν 3306 (s), 3060 (m), 2933 (s), 2832 (m), 1640 (s), 1539 (s), 1487 (s), 1297 (m), 1263 (s), 1148 (w), 1028 (m), 805 (m), 775 (w), 700 (s) cm<sup>-1</sup>.

**HRMS** (ESI MS) calcd for C<sub>21</sub>H<sub>20</sub>NO<sub>2</sub> [M+H<sup>+</sup>]: 318.1494, found: 318.1500.

### 3.11. Further transformation-C-H activation

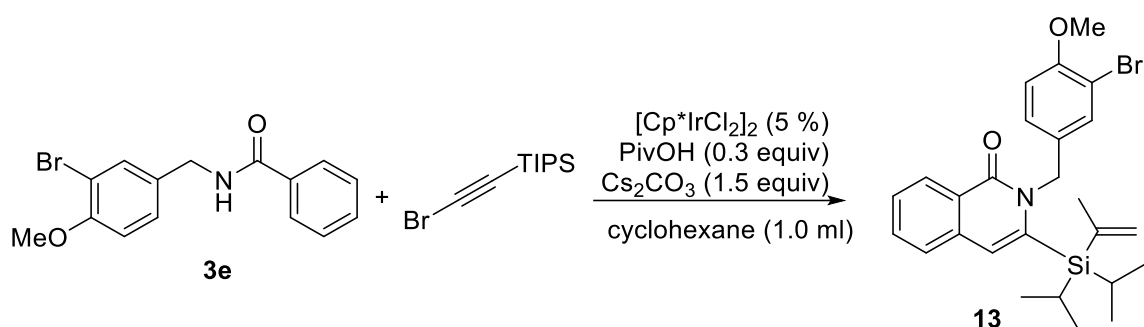

A mixture of required *N*-(3-bromo-4-methoxybenzyl)benzamide **3e** (63.8 mg, 0.2 mmol, 1 equiv), (2-bromoethynyl)triisopropylsilane (78 mg, 0.3 mmol, 1.5 equiv), [Cp\*IrCl<sub>2</sub>]<sub>2</sub> (8.0 mg, 5 mol%), Cs<sub>2</sub>CO<sub>3</sub> (97.6 mg, 0.3 mmol, 1.5 equiv), PivOH (6.0 mg, 0.06 mmol, 0.3 equiv) and 1 mL cyclohexane in a 15 mL sealed glass tube was heated at 80 °C under air with vigorous stirring for 18 hours. The reaction mixture was cooled to room temperature, and diluted with ethyl acetate and filtered through celite. The filtrate was concentrated *in vacuo* and purified by column chromatography on silica gel (isohexane/EA = 20/1 to 5/1) to give the corresponding product.<sup>[7]</sup>

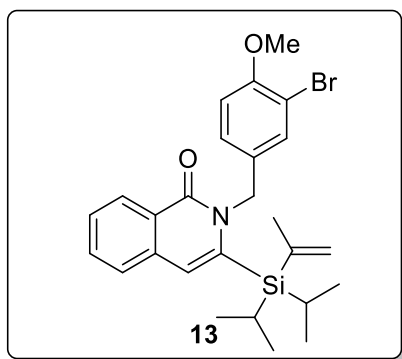

### 2-(3-bromo-4-methoxybenzyl)-3-(diisopropyl(prop-1-en-2-yl)silyl)isoquinolin-1(2H)-one

**Yield:** 39 mg (0.08 mmol, 81%).

**Physical State:** yellow oil.

**R<sub>f</sub> Value:** 0.24 (isohexane/EtOAc – 5/1).

**<sup>1</sup>H NMR** (300 MHz, CDCl<sub>3</sub>) δ 8.48 (dd, *J* = 8.0, 1.2 Hz, 1H), 7.71 (d, *J* = 7.8 Hz, 1H), 7.60 – 7.52 (m, 2H), 7.48 – 7.43 (m, 1H), 7.31 – 7.27 (m, 1H), 7.12 (s, 1H), 6.85 (d, *J* = 8.4 Hz, 1H), 5.90 (dd, *J* = 3.0, 1.6 Hz, 1H), 5.47 (dd, *J* = 2.9, 1.2 Hz, 1H), 5.14 (s, 2H), 3.87 (s, 3H), 1.83 (s, 3H), 1.45 – 1.35 (m, 2H), 1.02 – 0.97 (m, 12H).

**<sup>13</sup>C NMR** (75 MHz, CDCl<sub>3</sub>) δ 162.33, 155.75, 142.10, 140.64, 139.23, 133.21, 132.17, 131.81, 130.67, 129.95, 128.70, 128.29, 127.99, 126.68, 112.22, 112.08, 107.48, 56.46, 51.01, 24.53, 18.75, 18.42, 18.16, 11.34, 11.02.

**IR** (ATR in CDCl<sub>3</sub>) ν 2870 (m), 2183 (w), 1640 (s), 1408 (m), 1148 (w), 1006 (m), 916 (s), 853 (m), 752 (w) cm<sup>-1</sup>.

**HRMS** (ESI MS) calcd for C<sub>26</sub>H<sub>33</sub>BrNO<sub>2</sub>Si [M+H<sup>+</sup>]: 498.1464, found: 498.1464.

### 3.12. Further transformation-Bz removal

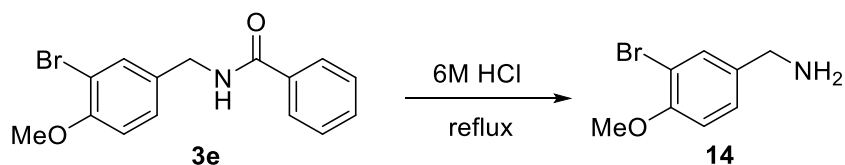

Reflux a suspension of *N*-(3-bromo-4-methoxybenzyl)benzamide **3e** (63.8 mg, 0.2 mmol, 1 equiv) in 6 M HCl (13 mL, 80 mmol) until a clear solution was obtained (18 hours). The reaction mixture was cooled to room temperature. Then add NaOH solution slowly basified the resulting

solution, then extracted with DCM (3 times), dry it with  $K_2CO_3$ , evaporate to get the pure amine as yellow oil.<sup>[8]</sup>

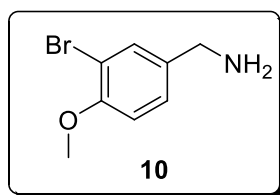

### (3-bromo-4-methoxyphenyl)methanamine

**Yield:** 33 mg (0.14 mmol, 95%).

**Physical State:** yellow oil.

**R<sub>f</sub> Value:** 0.05 (isohexane/EtOAc – 5/1).

**<sup>1</sup>H NMR** (300 MHz,  $CDCl_3$ )  $\delta$  7.51 (d,  $J = 2.0$  Hz, 1H), 7.24 – 7.20 (m, 1H), 6.86 (d,  $J = 8.3$  Hz, 1H), 3.90 – 3.82 (m, 5H), 2.17 (s, 2H).

**<sup>13</sup>C NMR** (75 MHz,  $CDCl_3$ )  $\delta$  154.90, 133.67, 132.31, 127.31, 112.10, 111.80, 56.46, 31.07.

**IR** (ATR in  $CDCl_3$ )  $\nu$  3350 (s), 2922 (s), 2840 (m), 1602 (w), 1494 (s), 1256 (s), 1054 (s), 1021 (w), 808 (m), 738 (w)  $cm^{-1}$ .

**HRMS** (ESI MS) calcd for  $[C_8H_{10}BrNO + H^+ - NH_3]$ : 200.9738, found: 200.9739.

## 4. References

- [1] G. Cecere, C. M. König, J. L. Alleva, D. W. C. MacMillan, *J. Am. Chem. Soc.* 2013, **135**, 11521–11524.
- [2] X. Ma, I. R. Hazelden, T. Langer, R. H. Munday, J. F. Bower, *J. Am. Chem. Soc.* 2019, **141**, 3356–3360.
- [3] S. Wang, E. Miao, H. Wang, B. Song, W. Huang, W. Yang, *Chem. Commun.* 2021, **57**, 5929–5932.
- [4] Q. Guo, X. Ren, Z. Lu, *Org. Lett.* 2019, **21**, 880–884.
- [5] M. P. Paudyal, A. M. Adebessin, S. R. Burt, D. H. Ess, Z. Ma, L. Kürti, J. R. Falck, *Science*. 2016, **353**, 1144–1147.
- [6] S. Bhowmik, S. Khanna, K. Srivastava, M. Hasanain, J. Sarkar, S. Verma, S. Batra, *ChemMedChem* 2013, **8**, 1767–1772.

- [7] G. Li, J. Hu, R. Zeng, D.-Q. Shi, Y. Zhao, *Org. Lett.* 2018, **20**, 2454–2458.
- [8] M. Gait, N. Seeman, D. Liu, O. Seitz, M. Komiyama, J. Micklefield, *Org. Biomol. Chem.* 2012, **10**, 8660–8668.
- [9] W. Lau, J. K. Kochi, *J. Am. Chem. Soc.* 2002, **106**, 7100–7112.
- [10] C.-Z. Yao, Z.-F. Xiao, J. Liu, X.-S. Ning, Y.-B. Kang, *Org. Lett.* 2014, **16**, 2498–2501.

## 5. $^1\text{H}$ -, $^{13}\text{C}$ -, $^{19}\text{F}$ - NMR Spectra

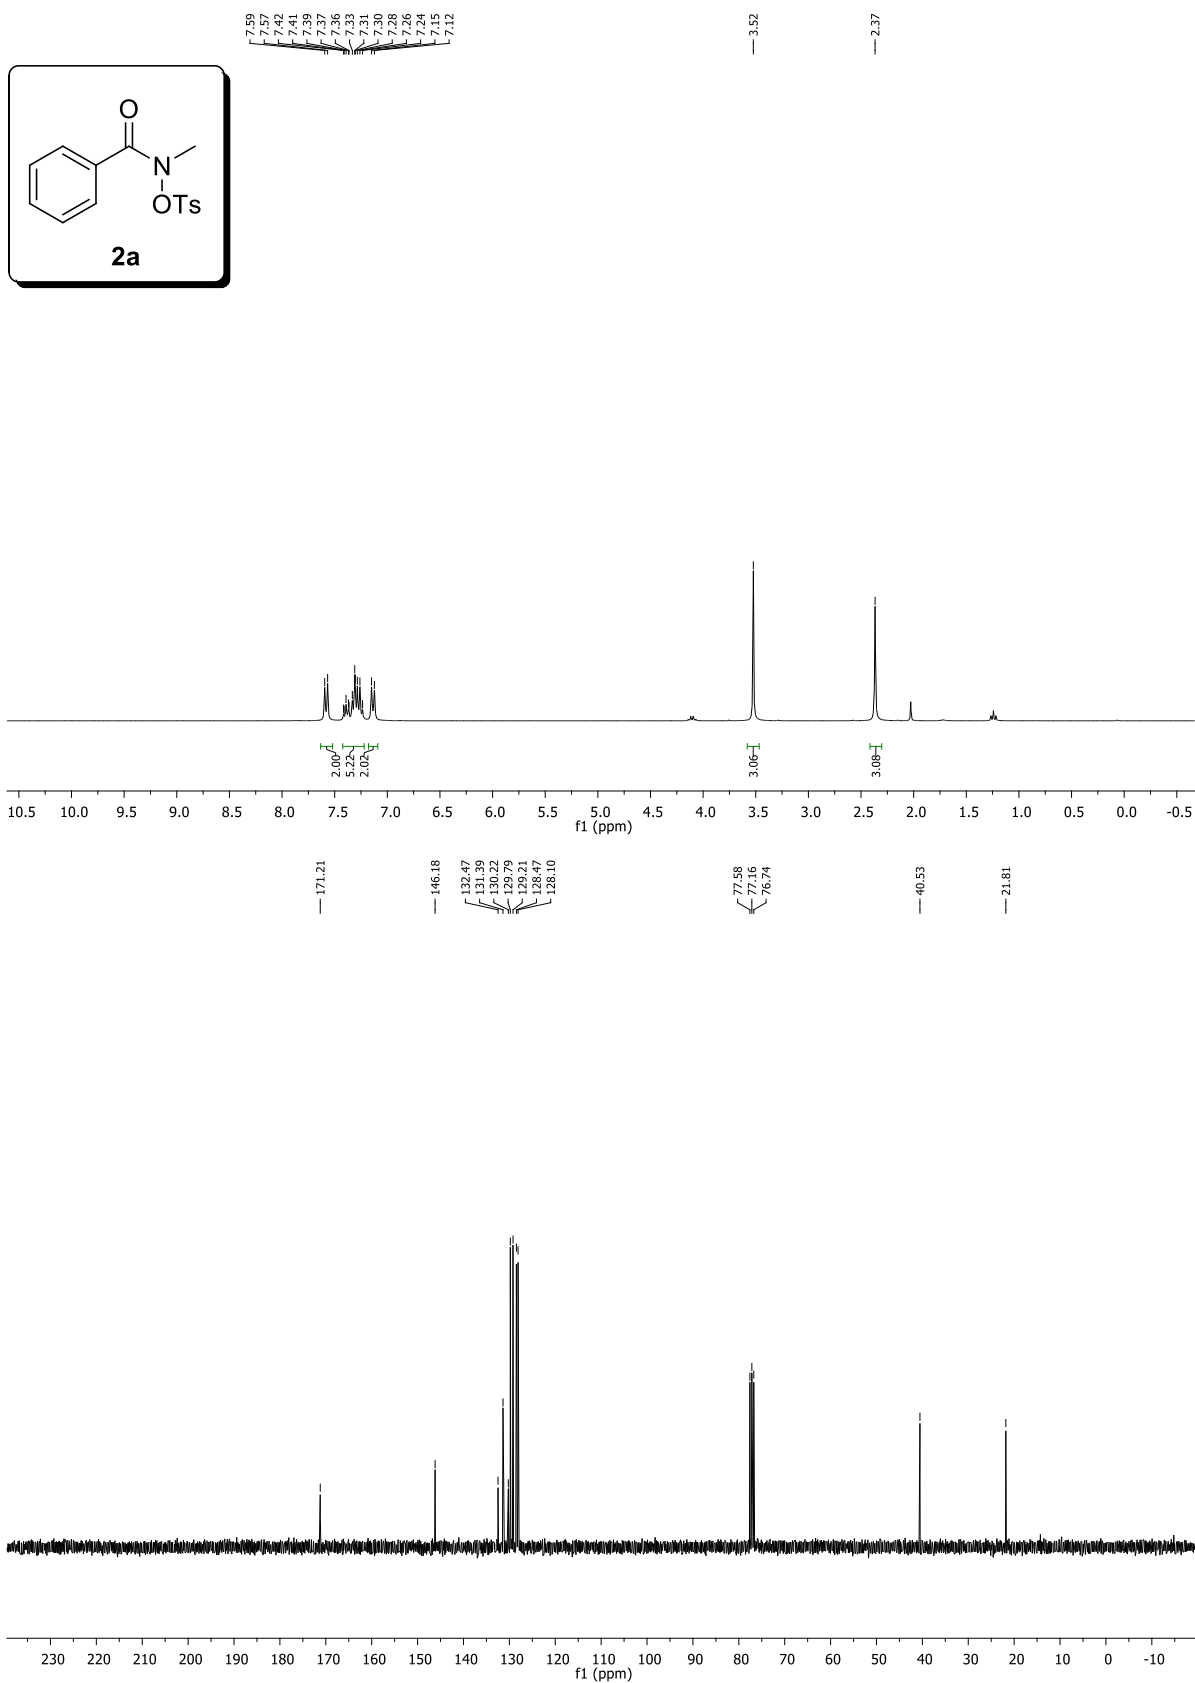



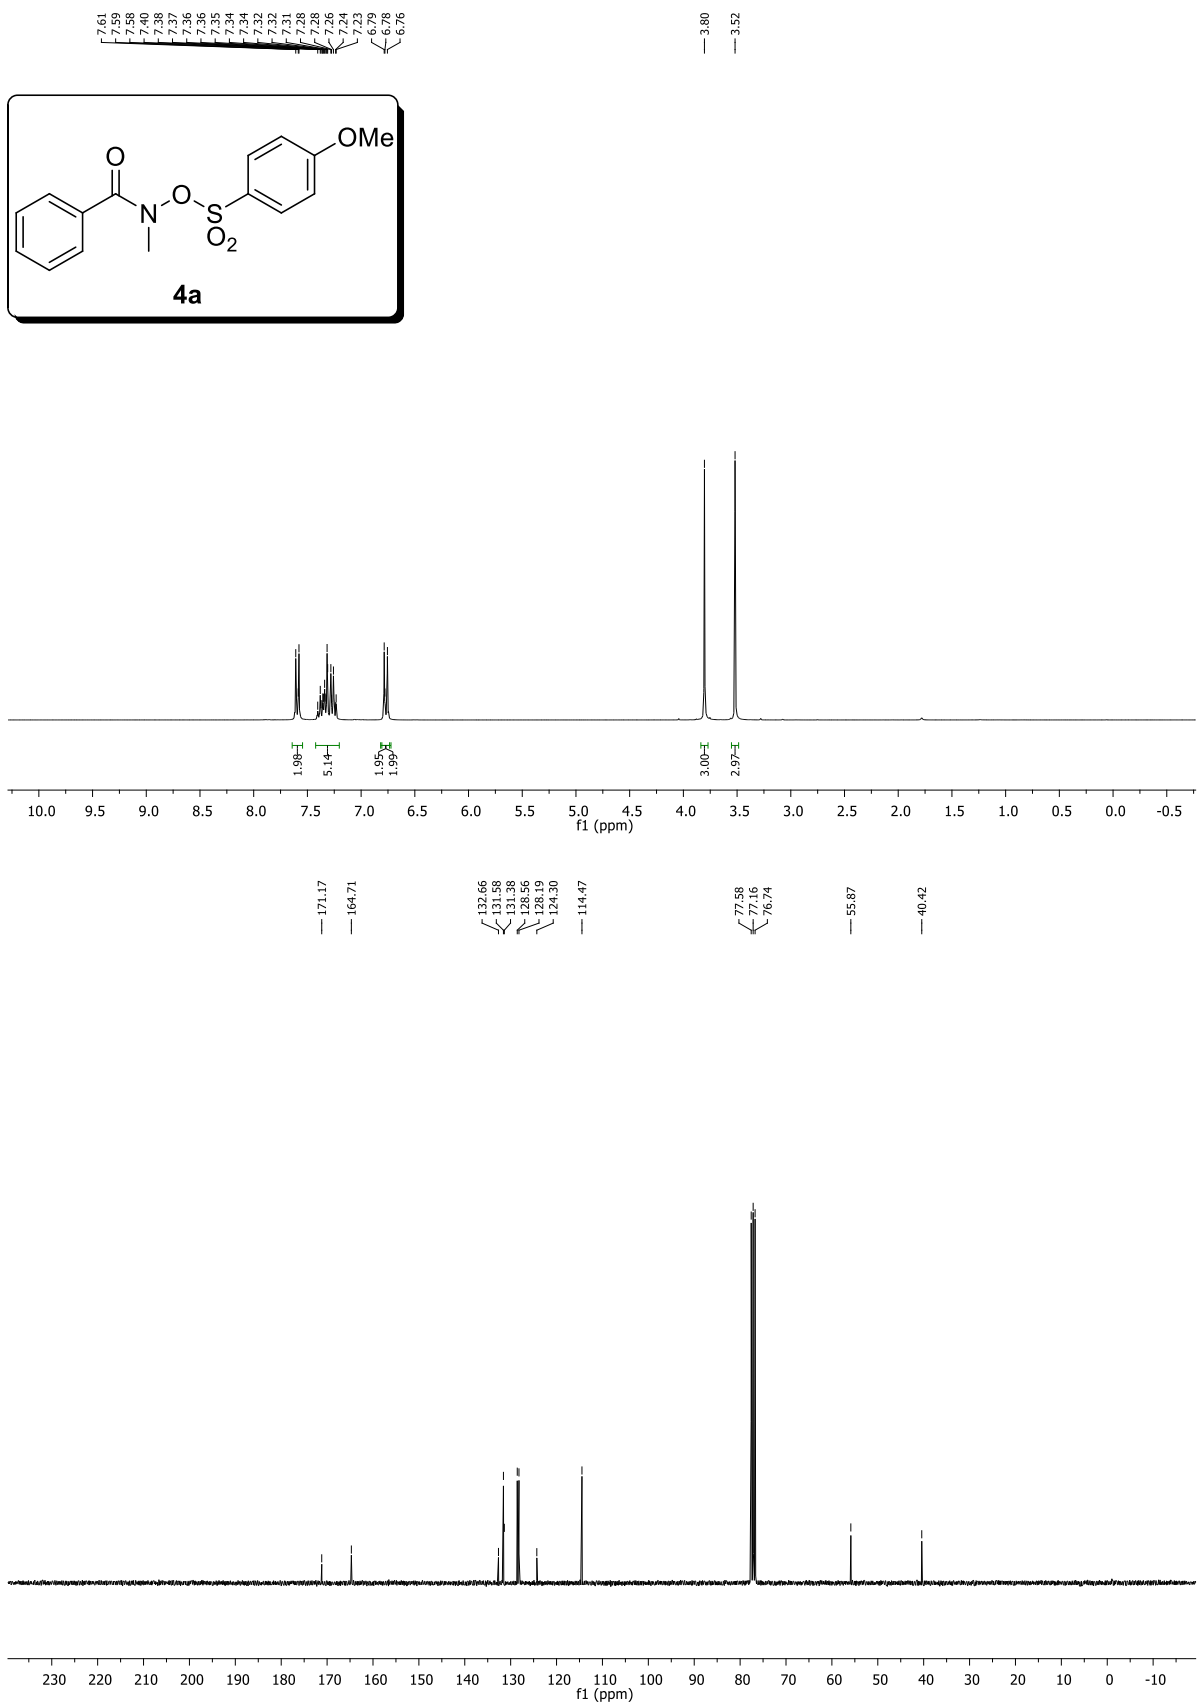

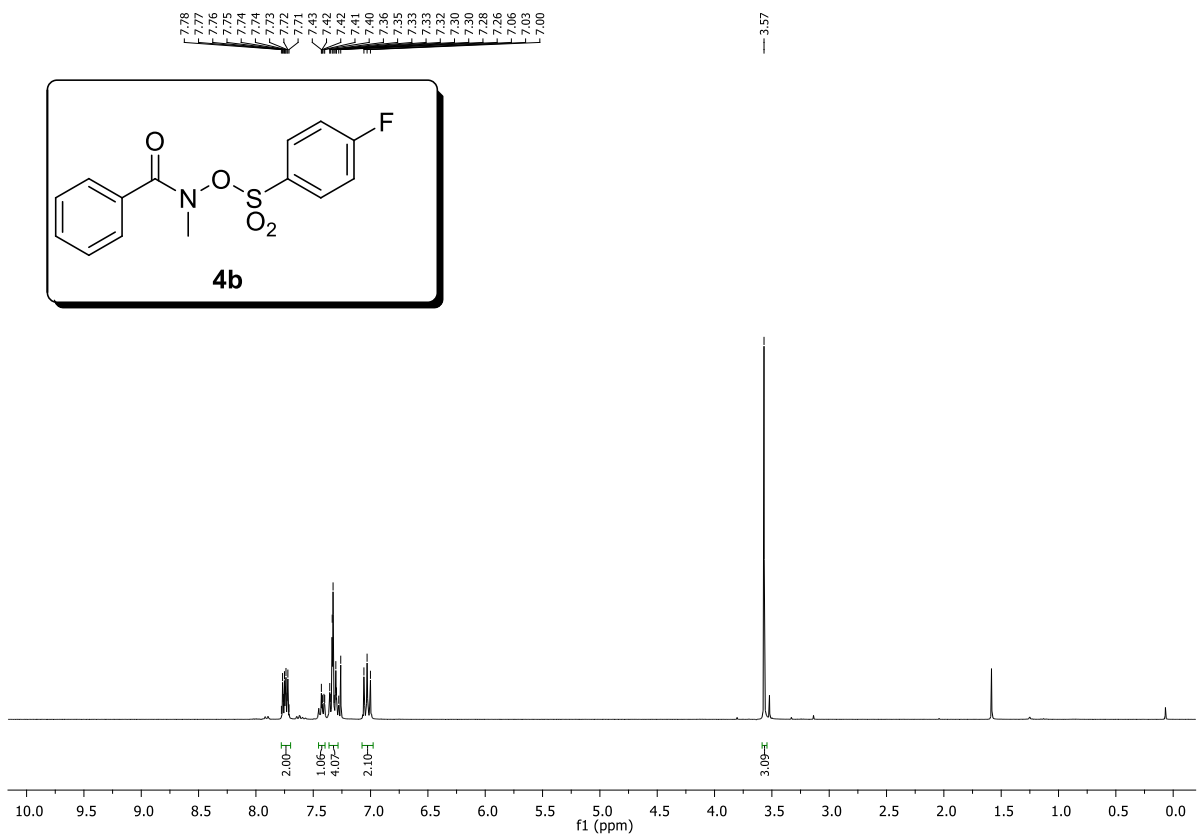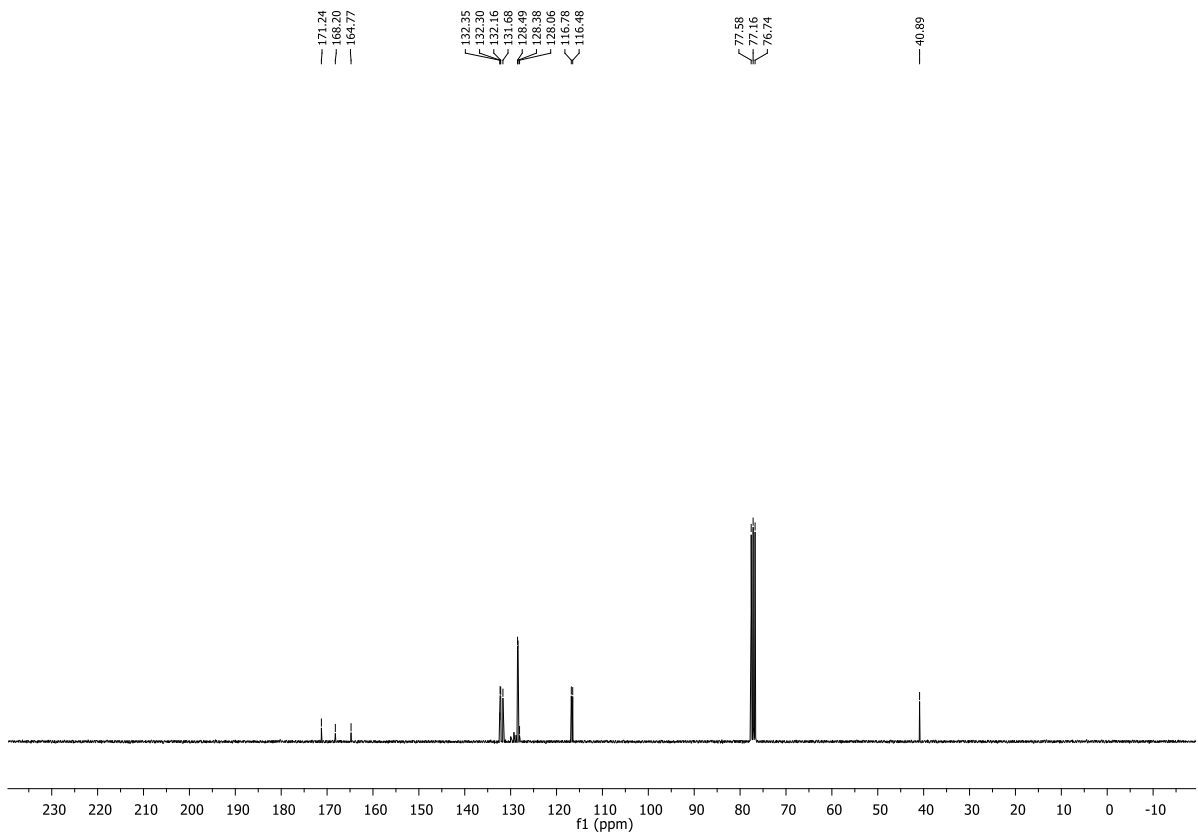

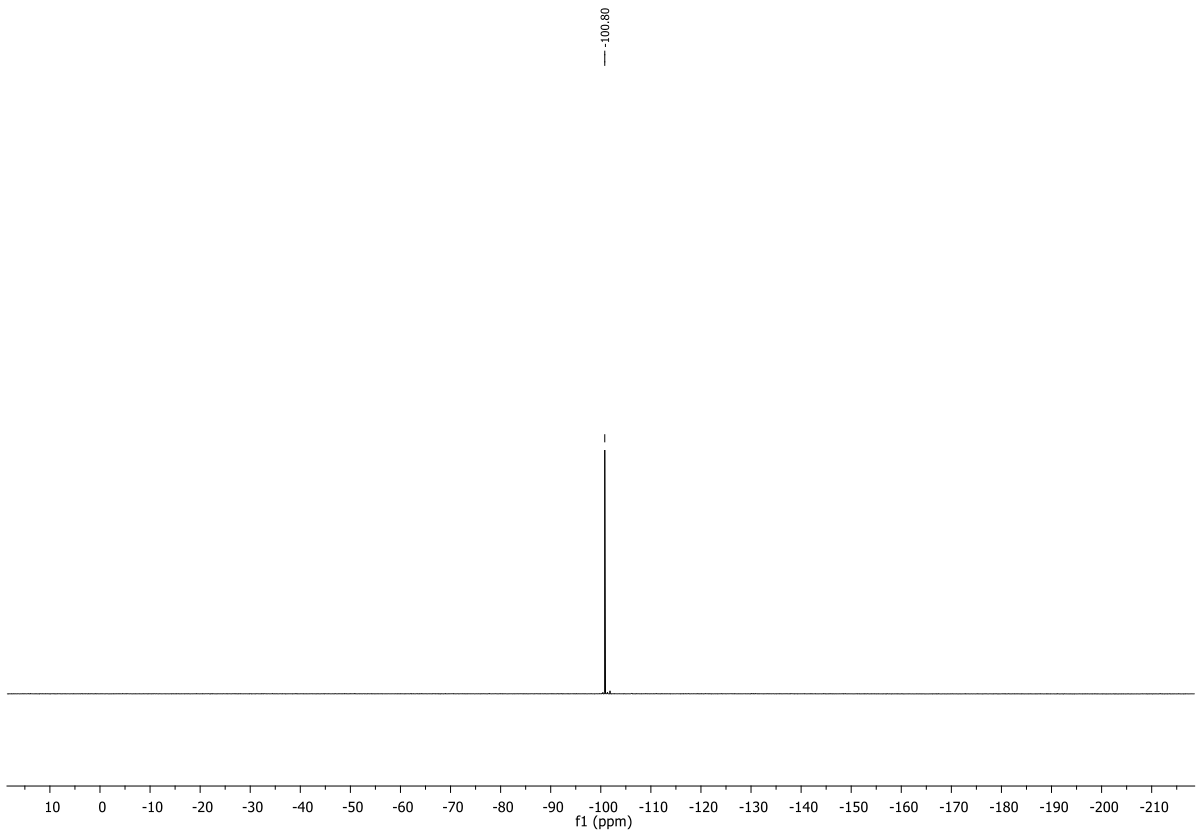

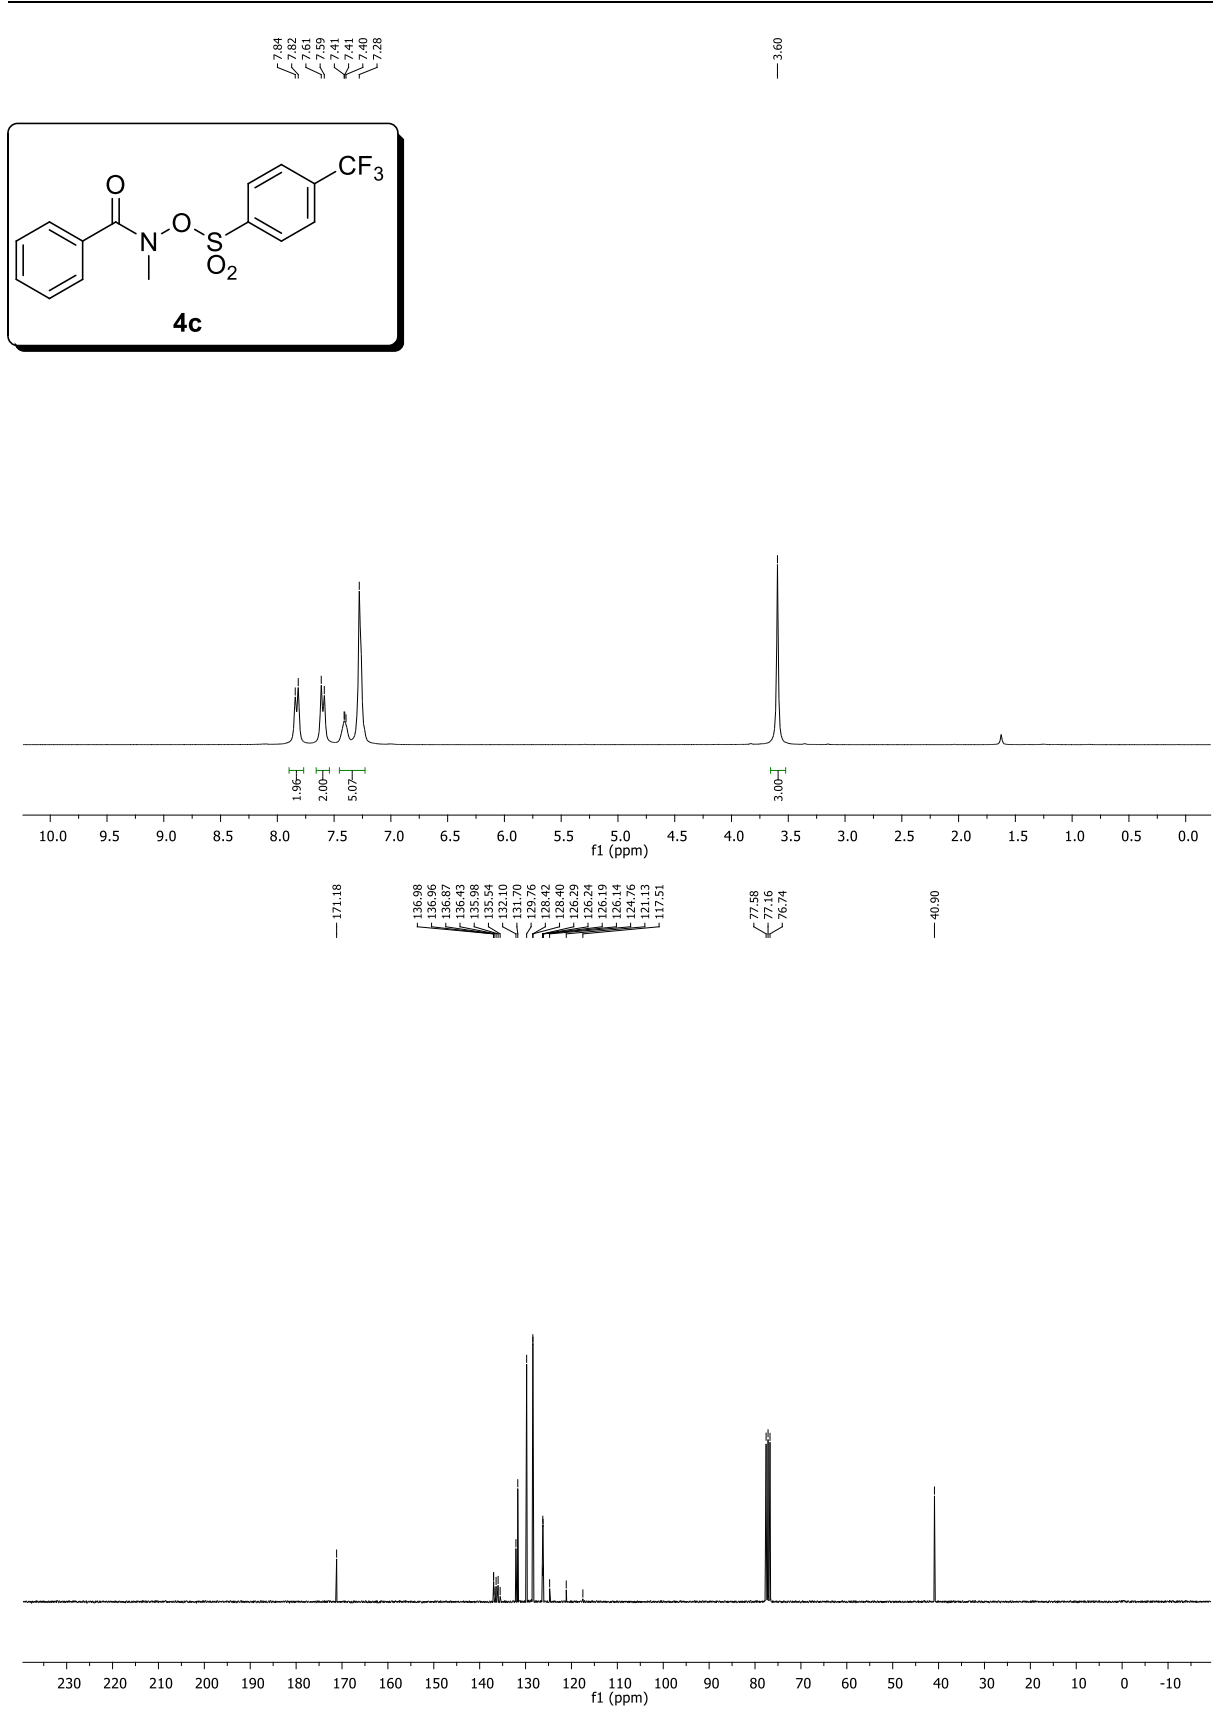

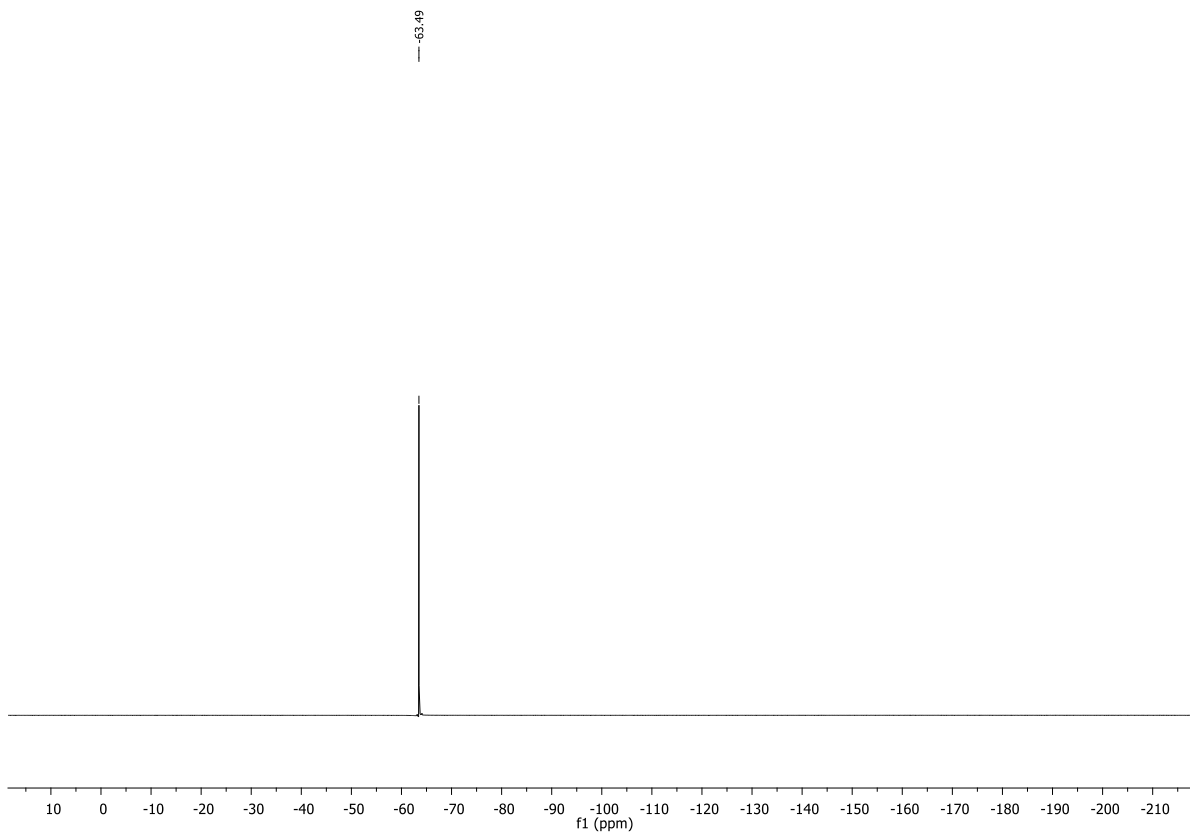

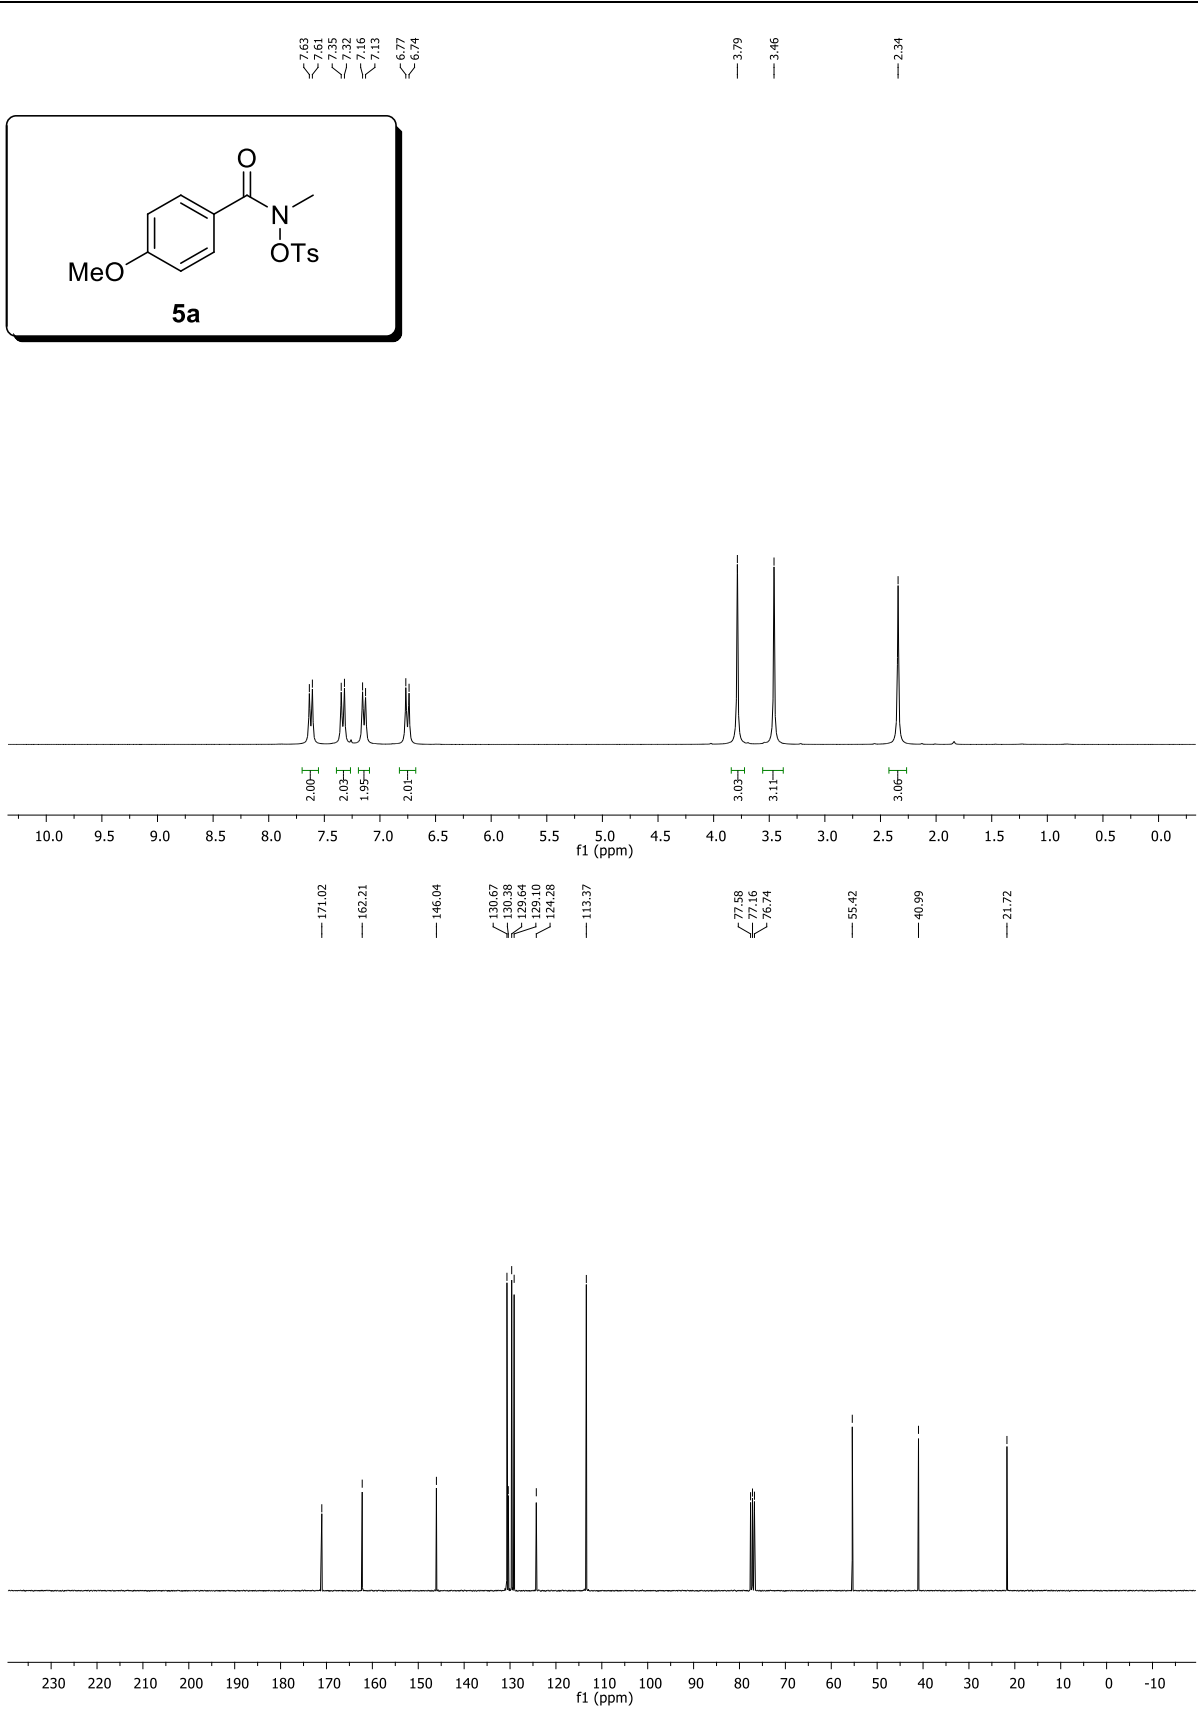

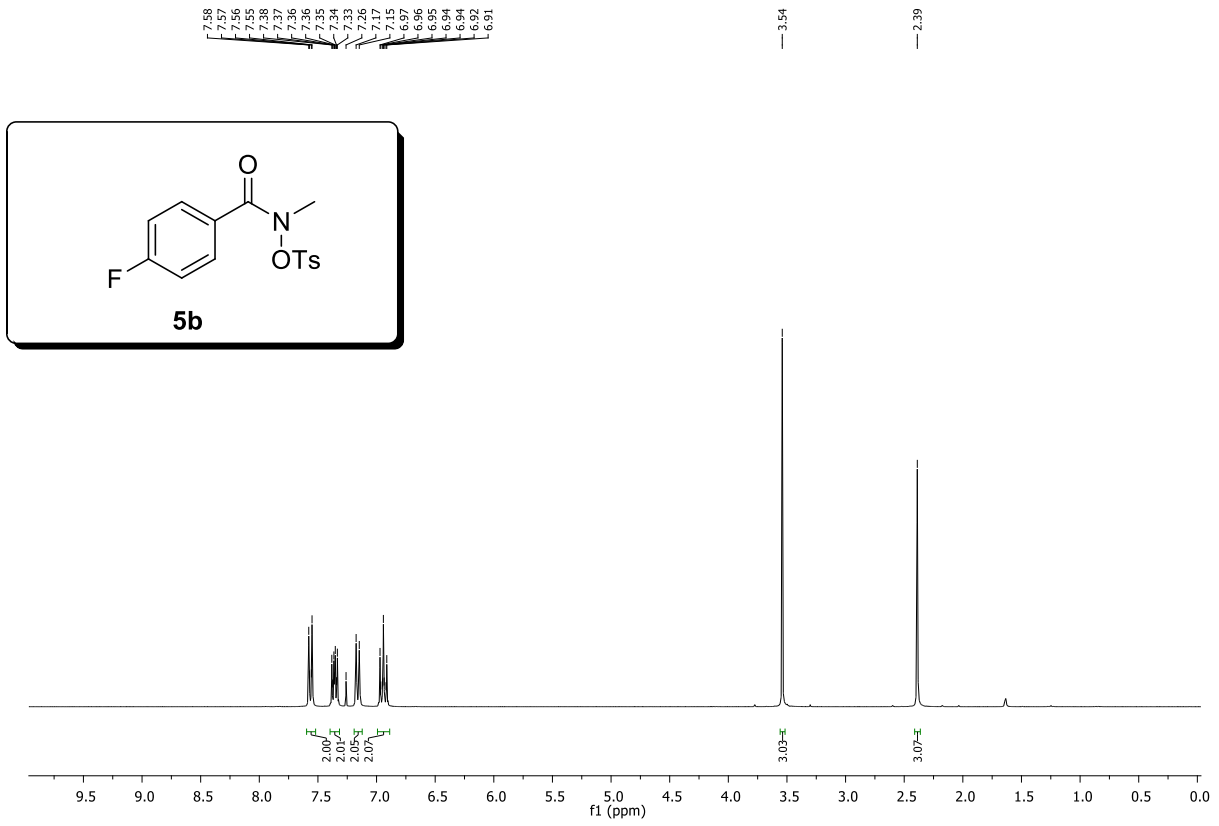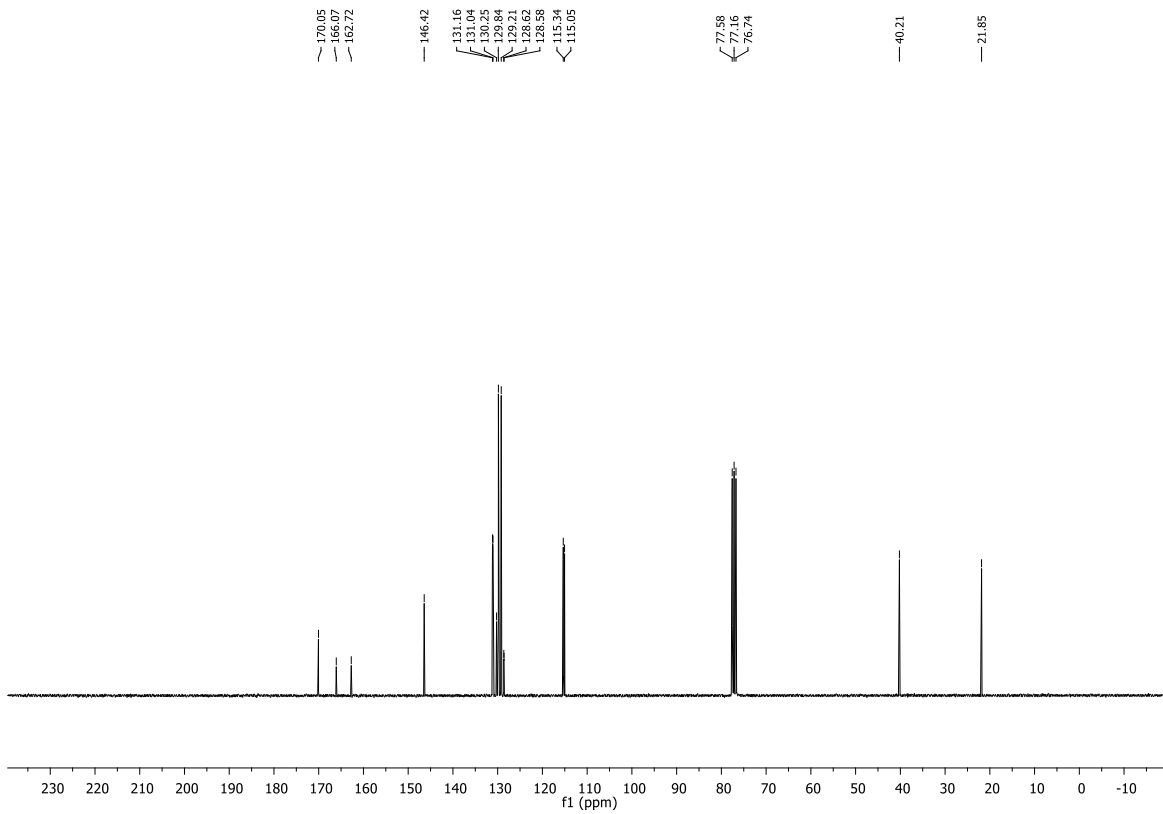

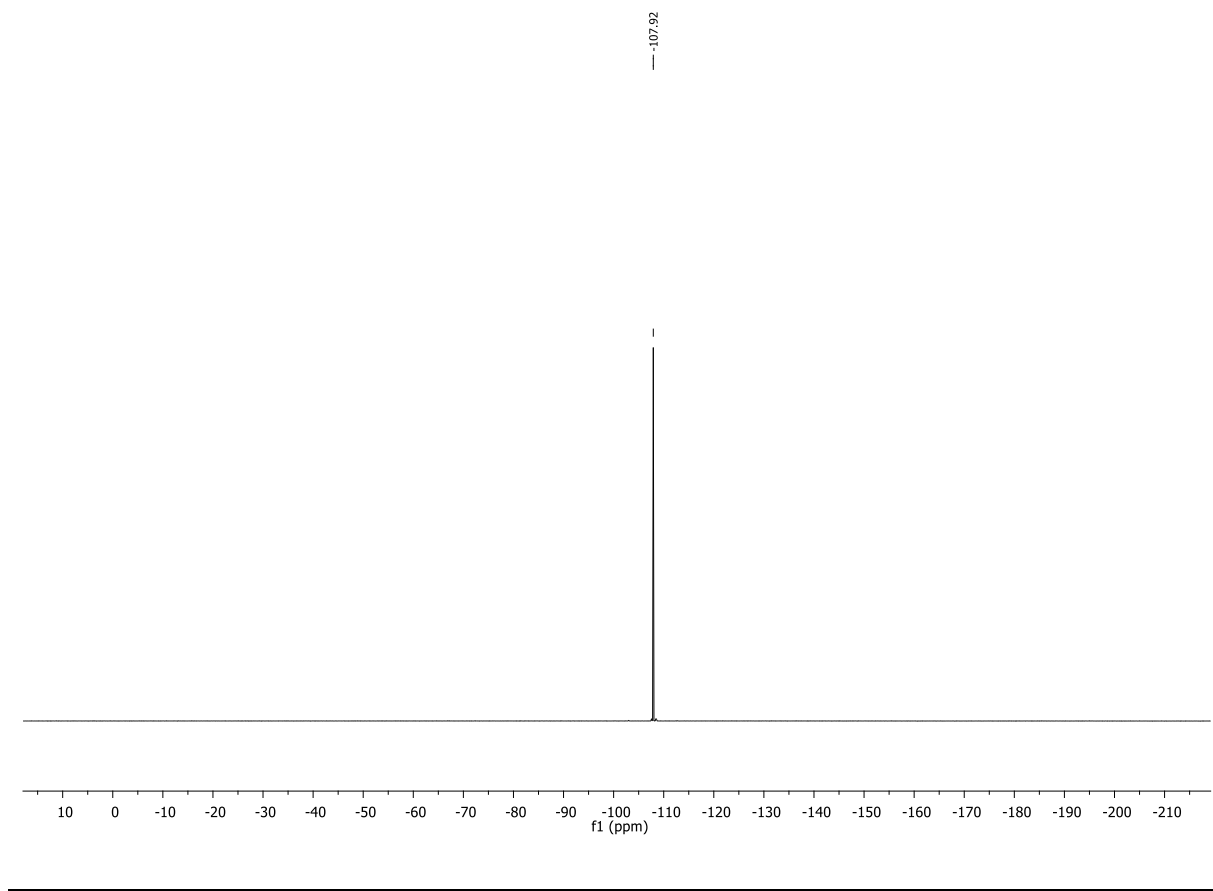



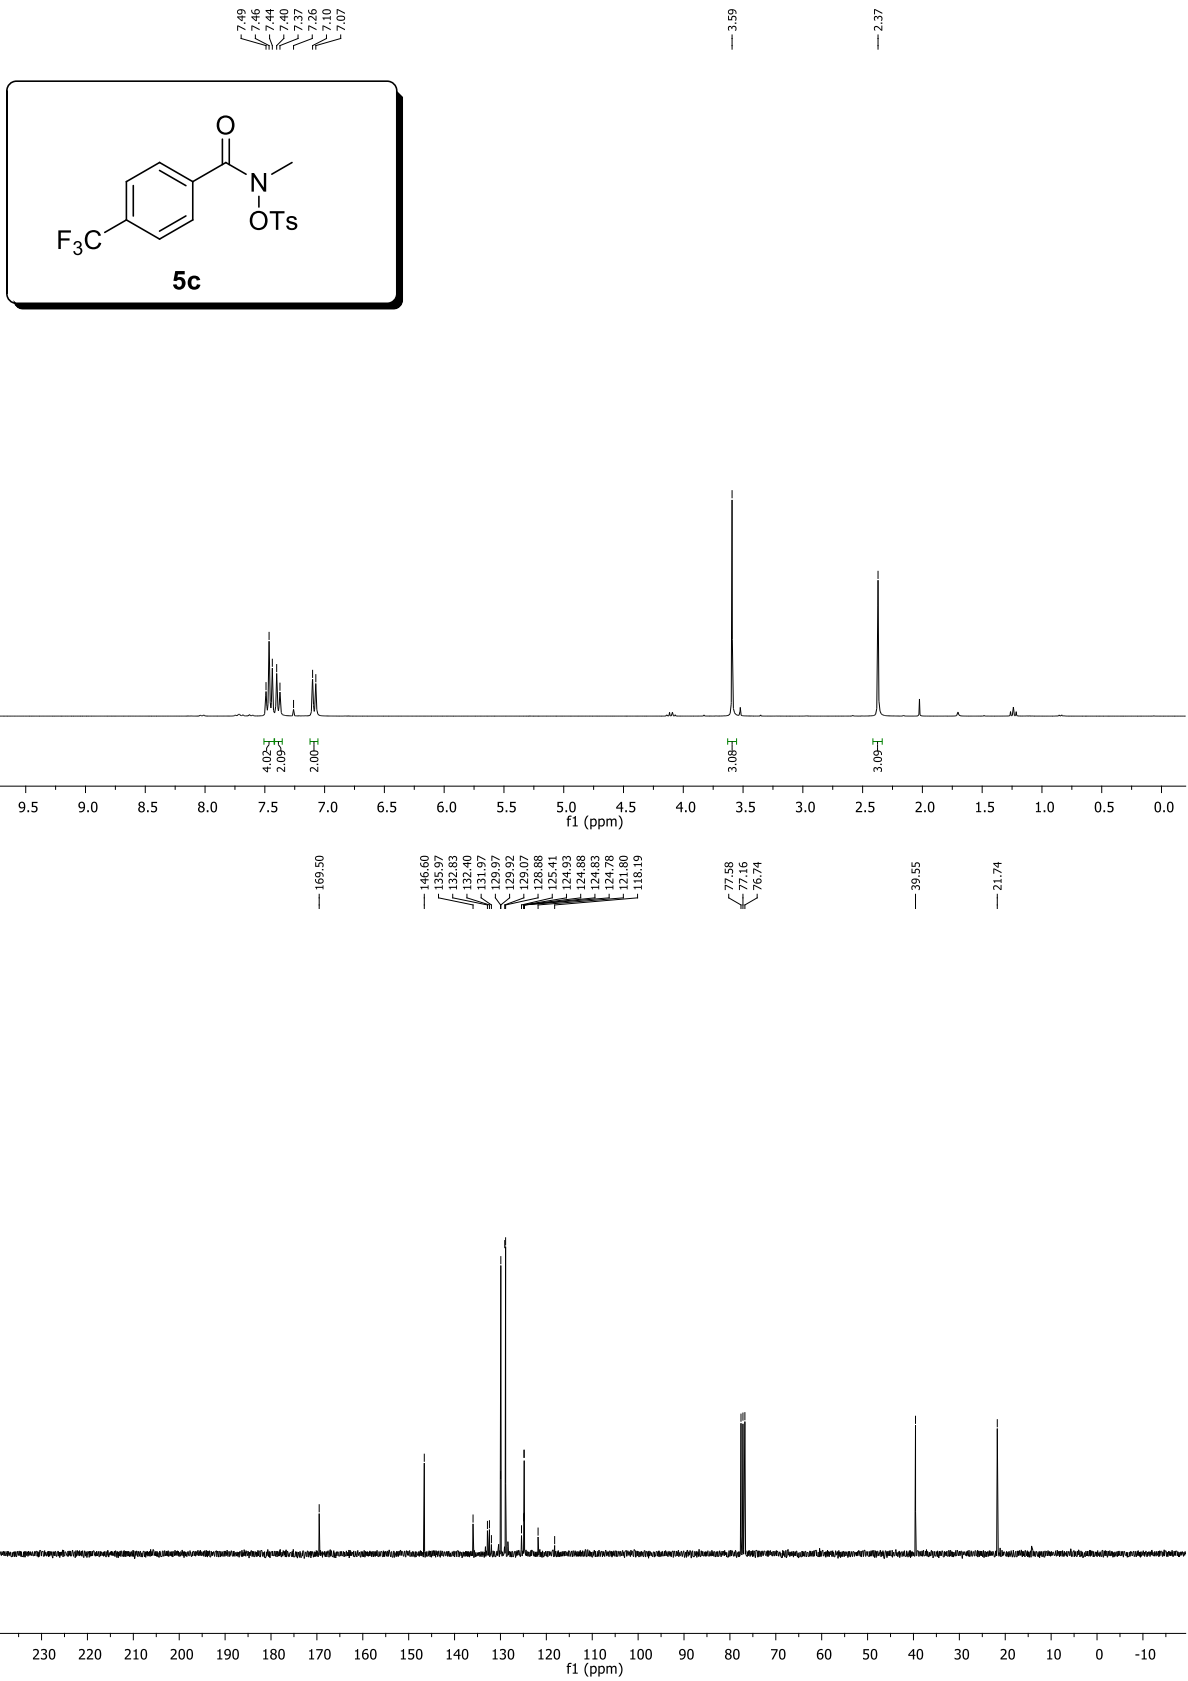

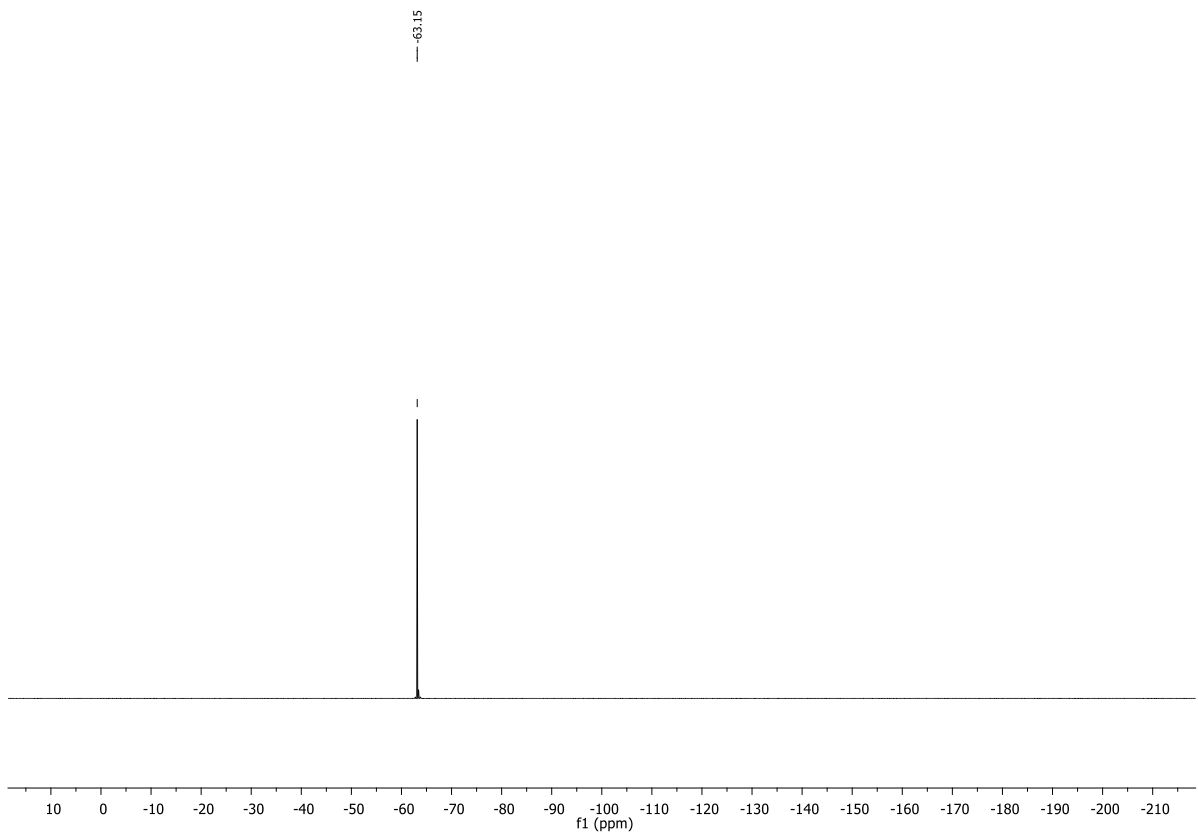

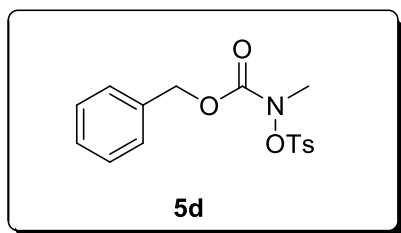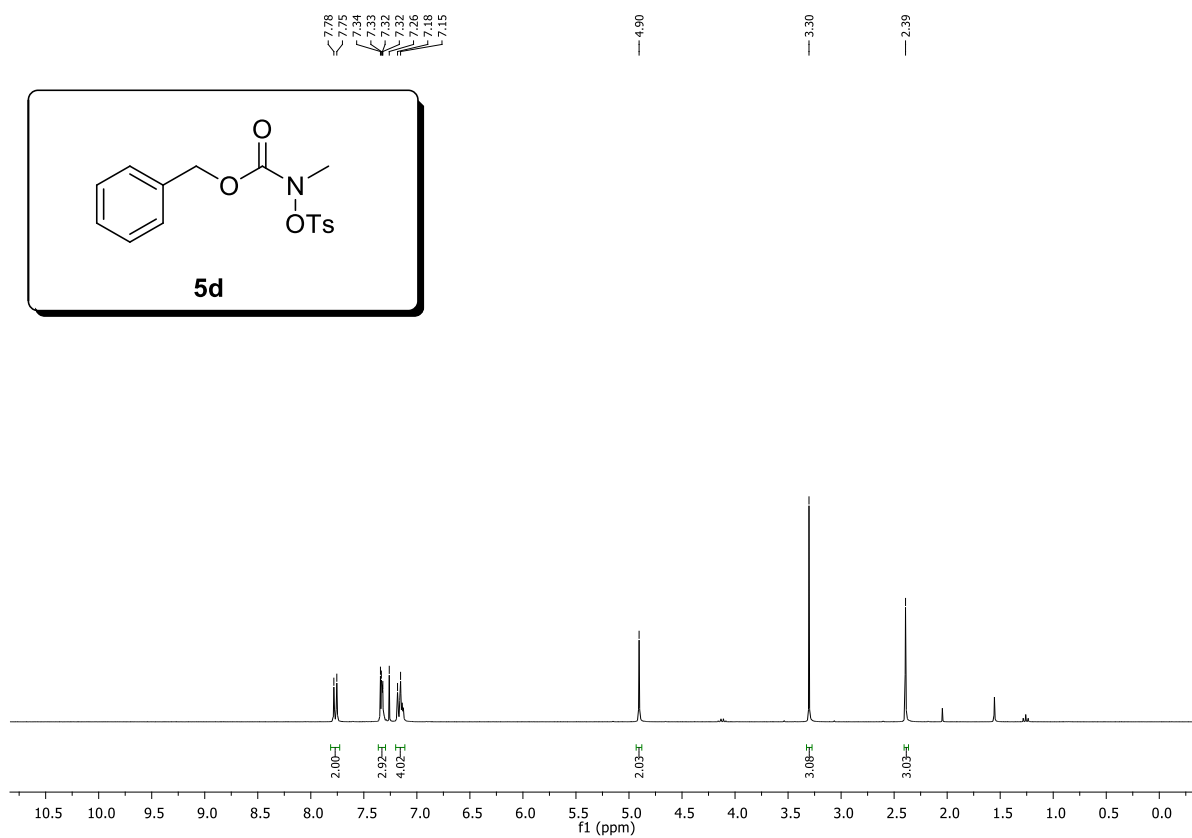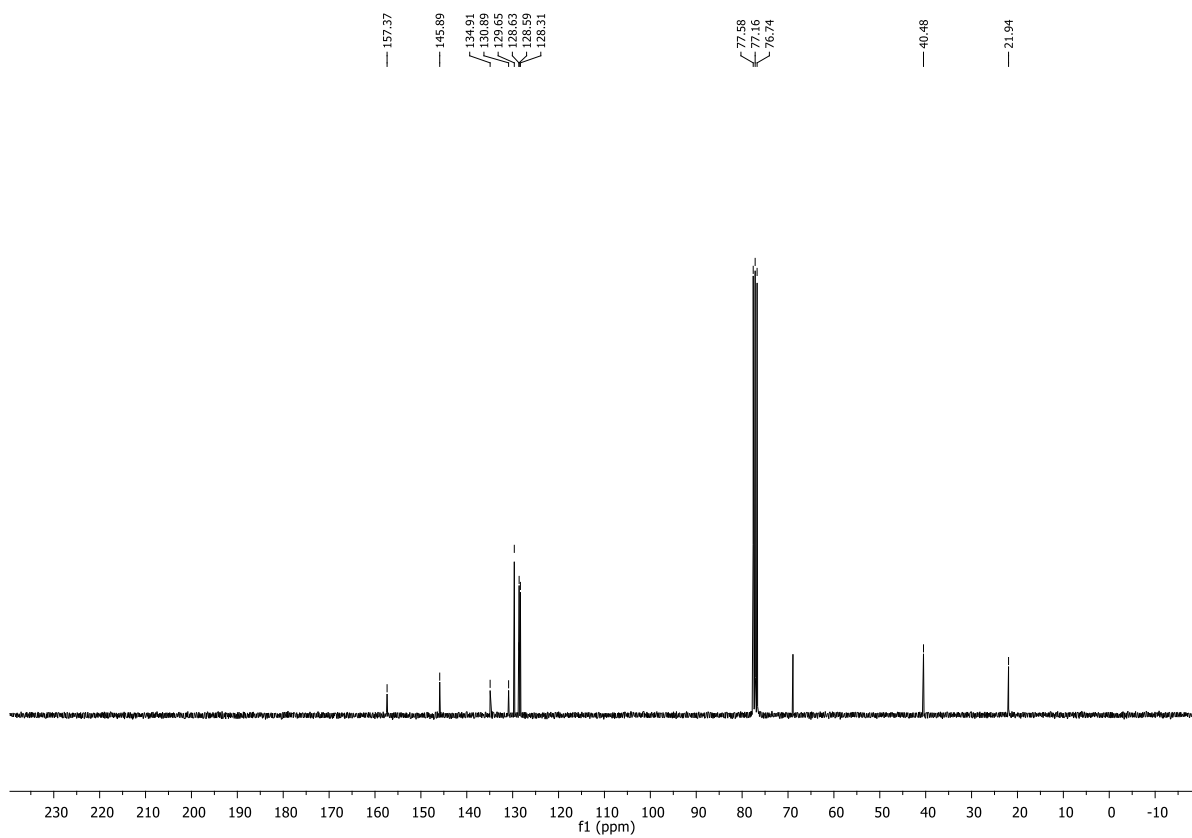

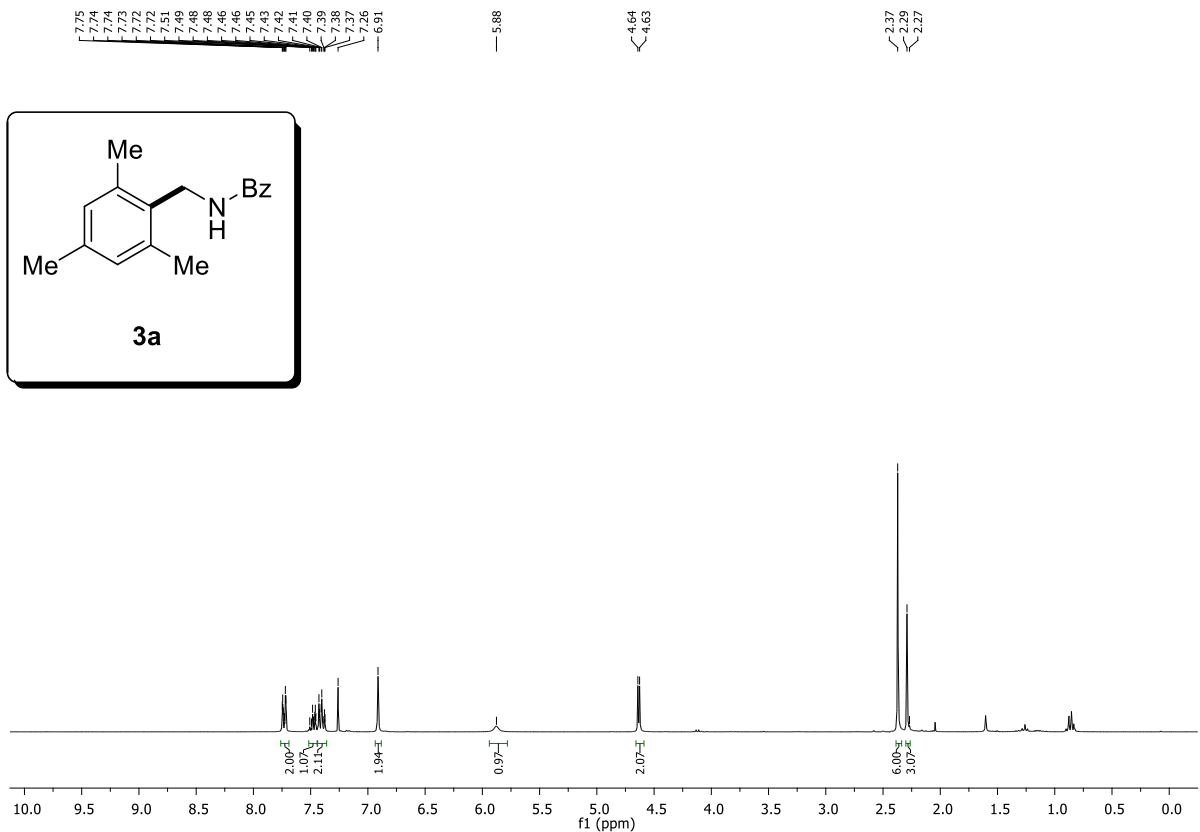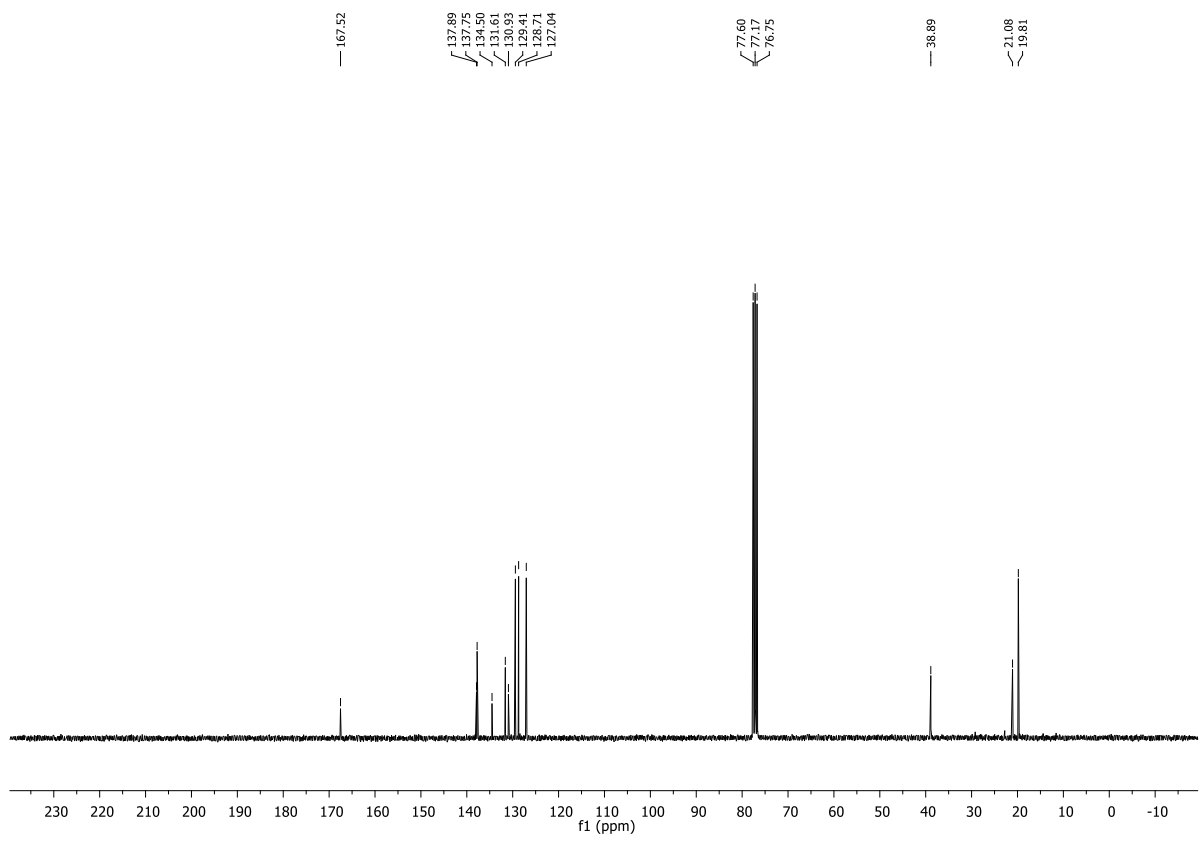

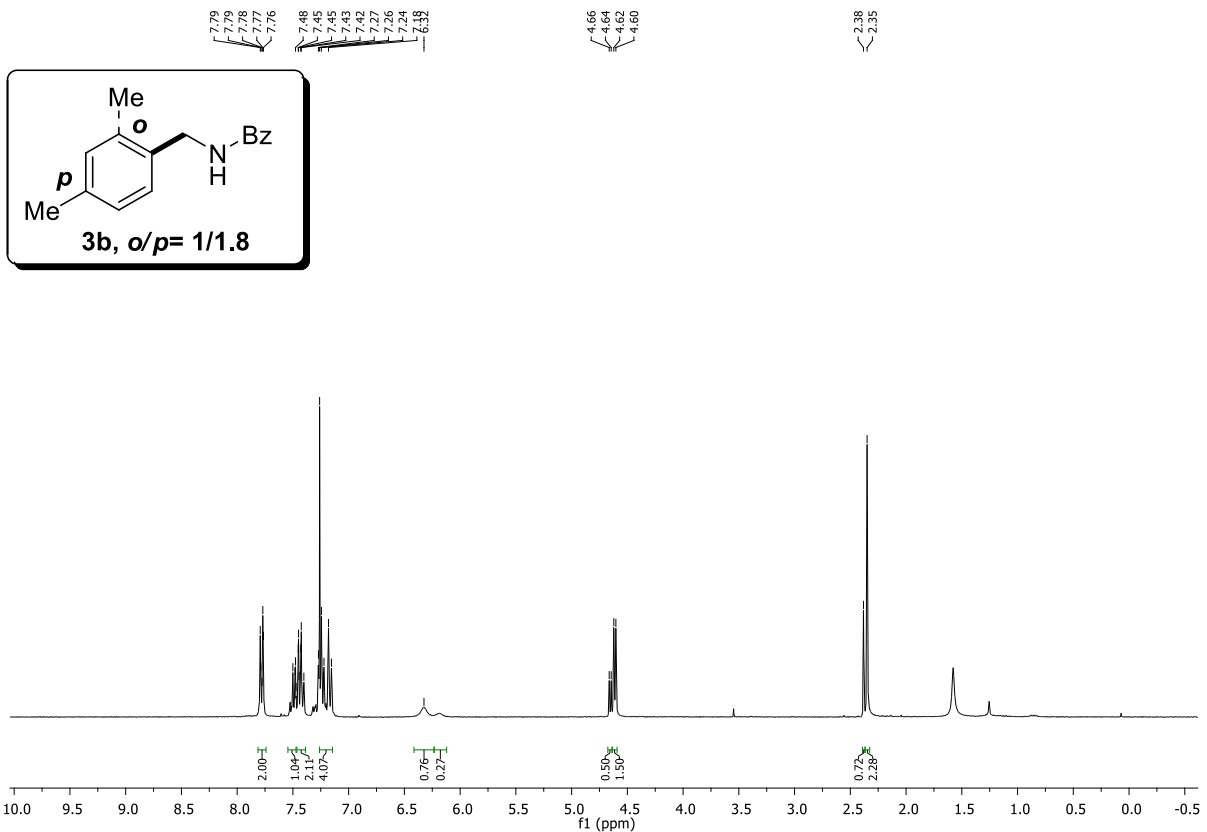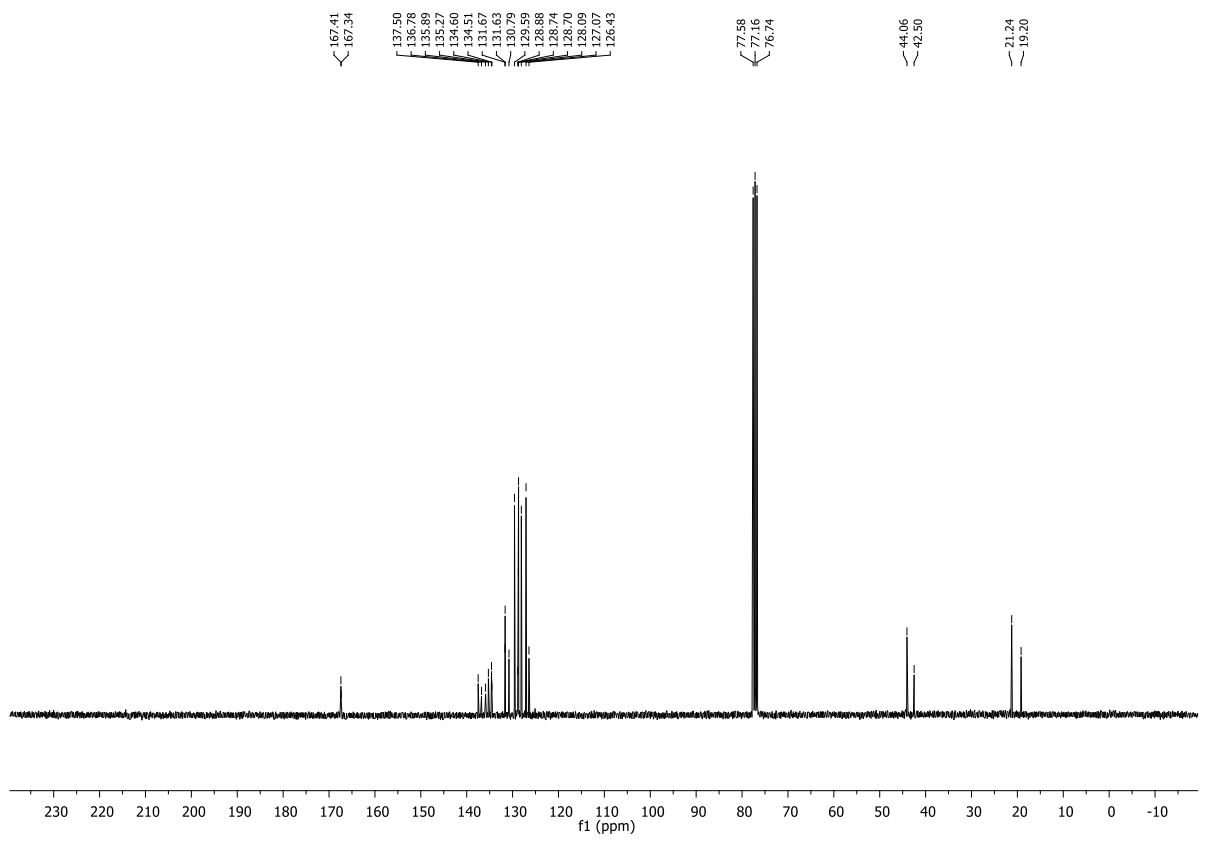

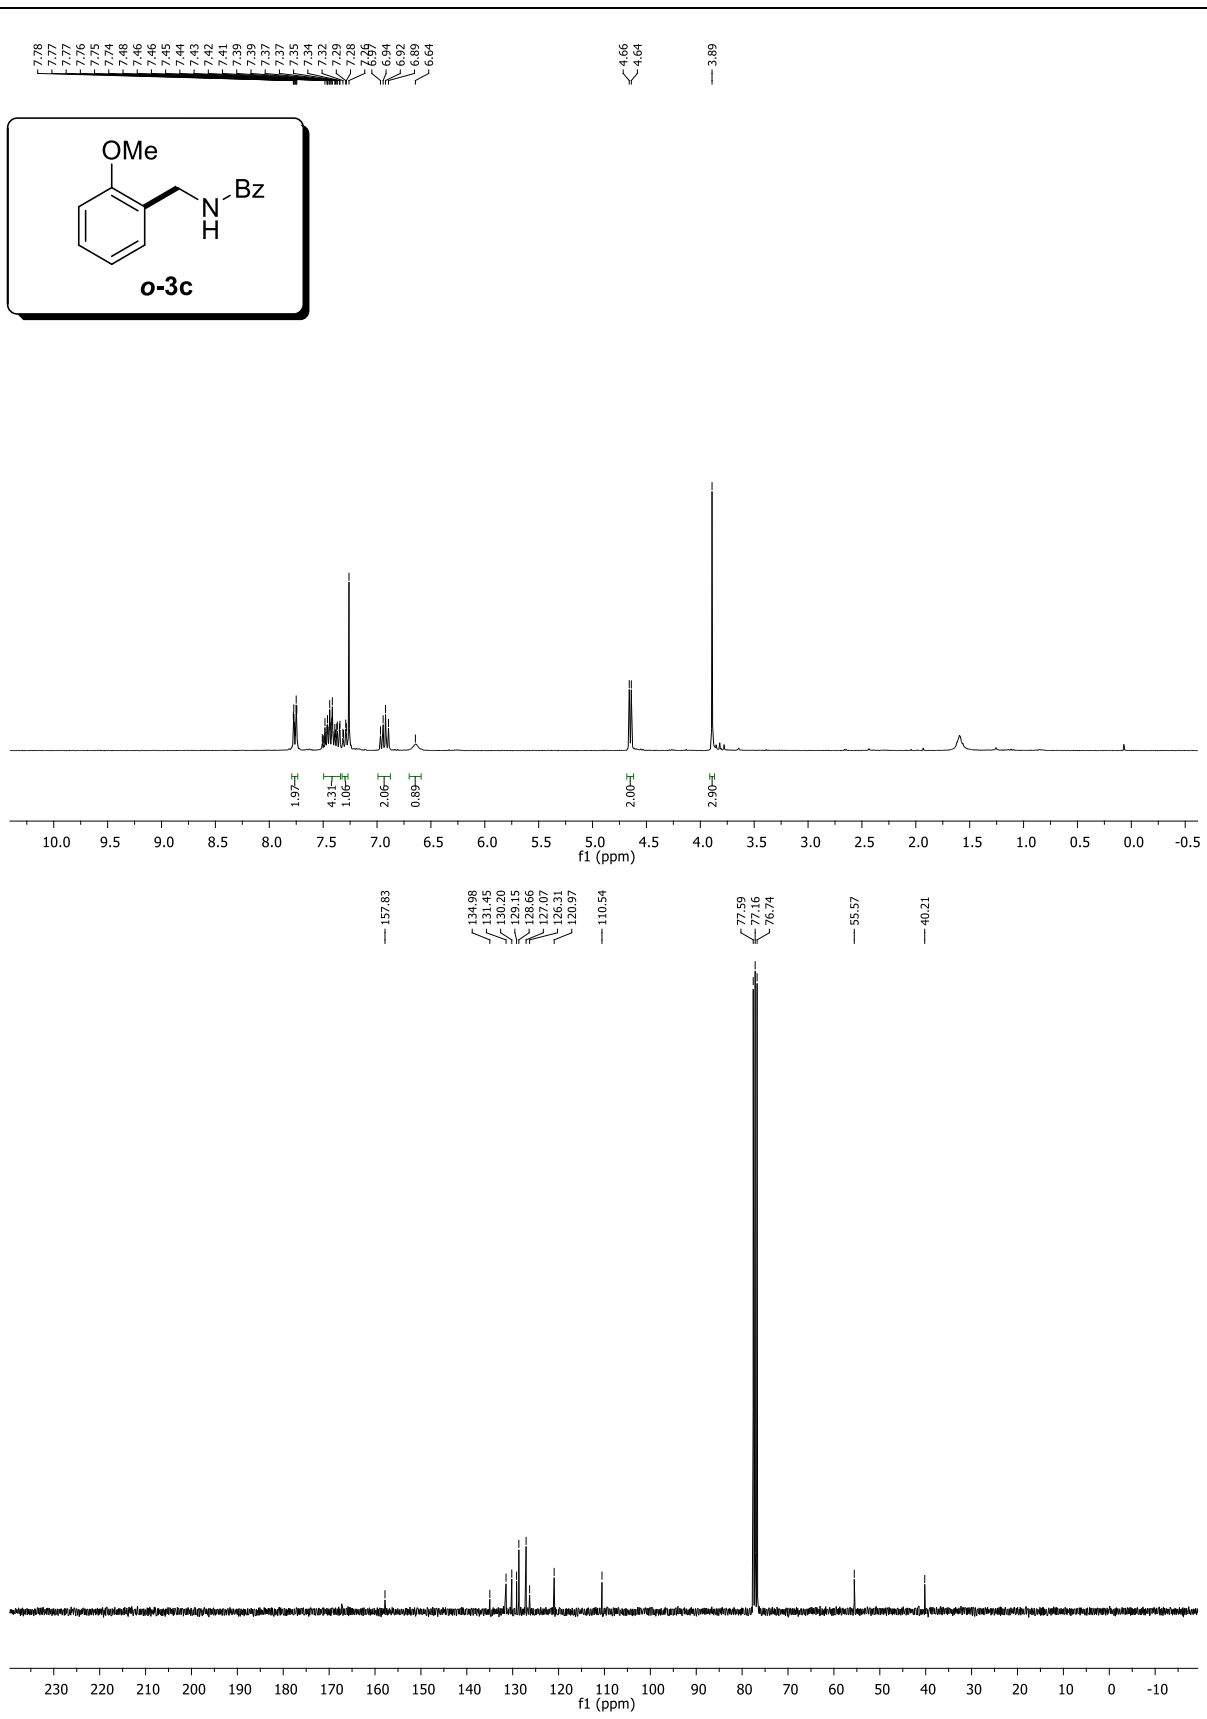

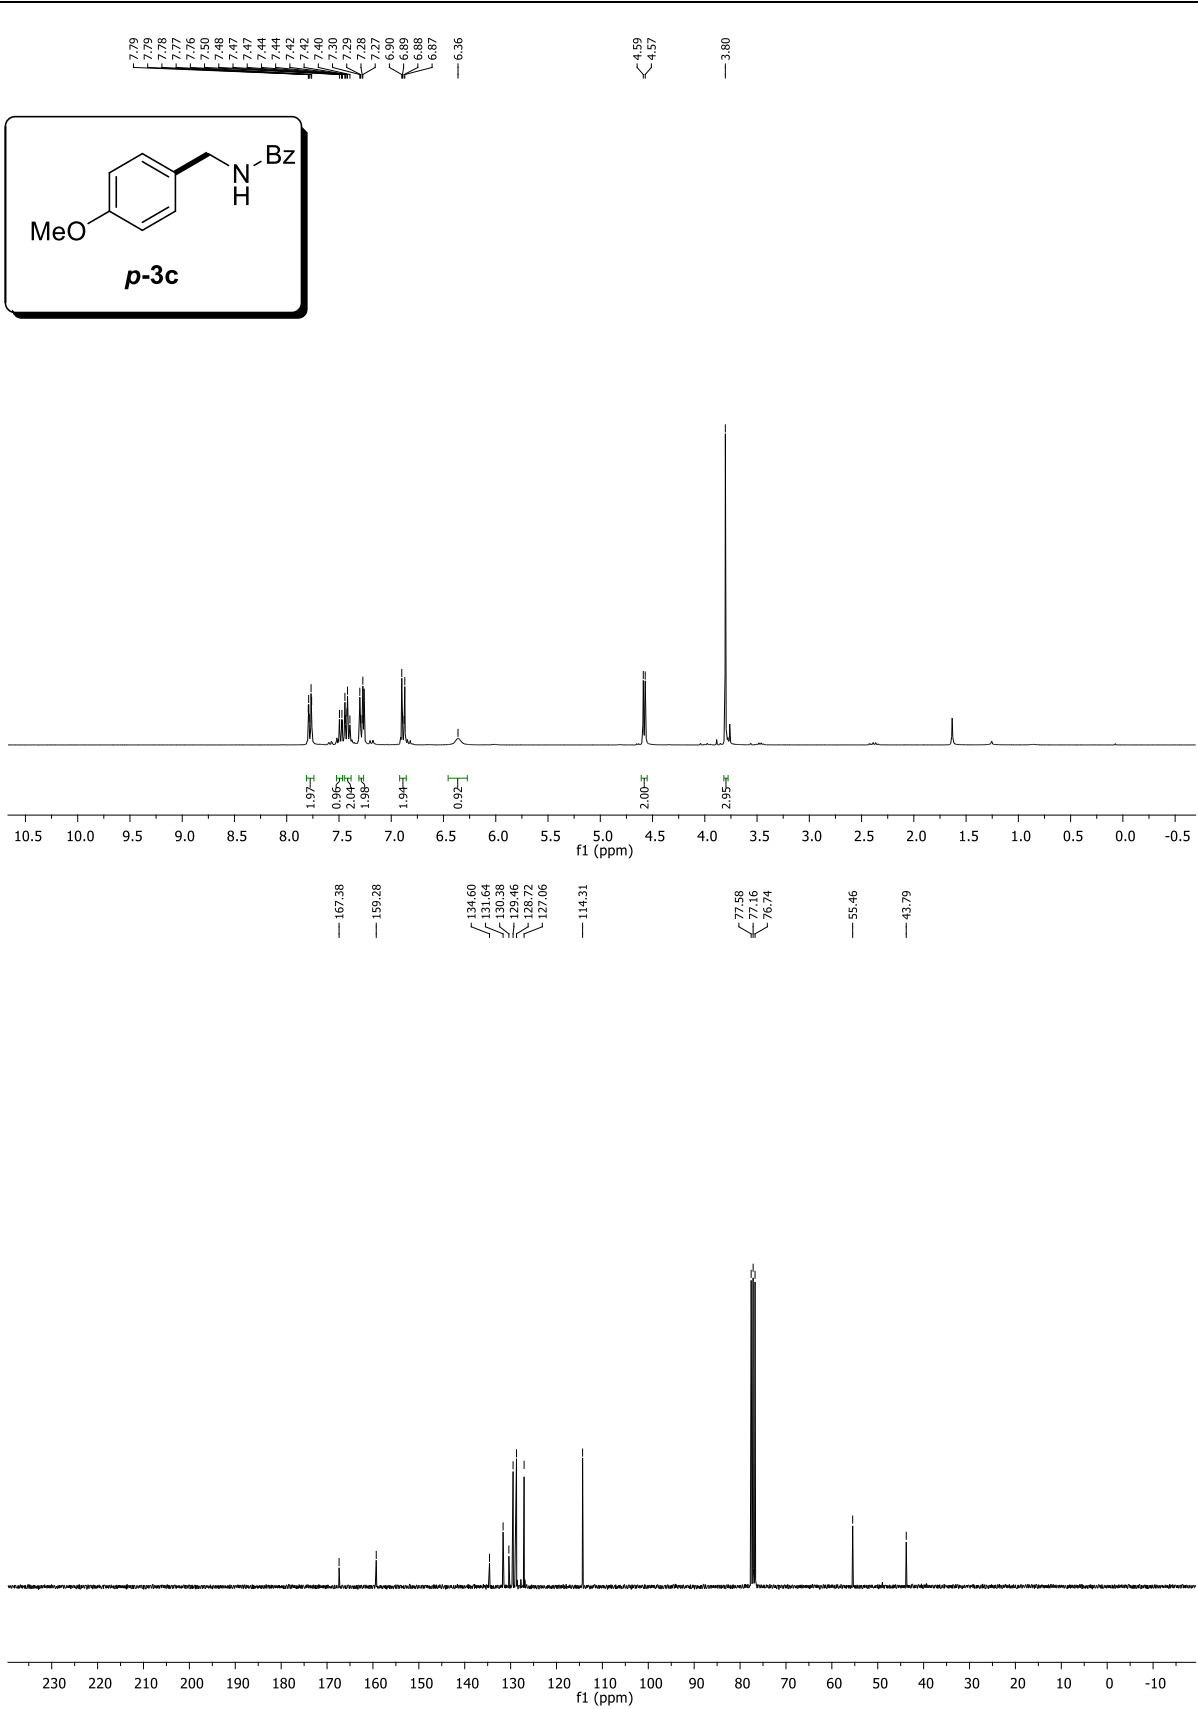

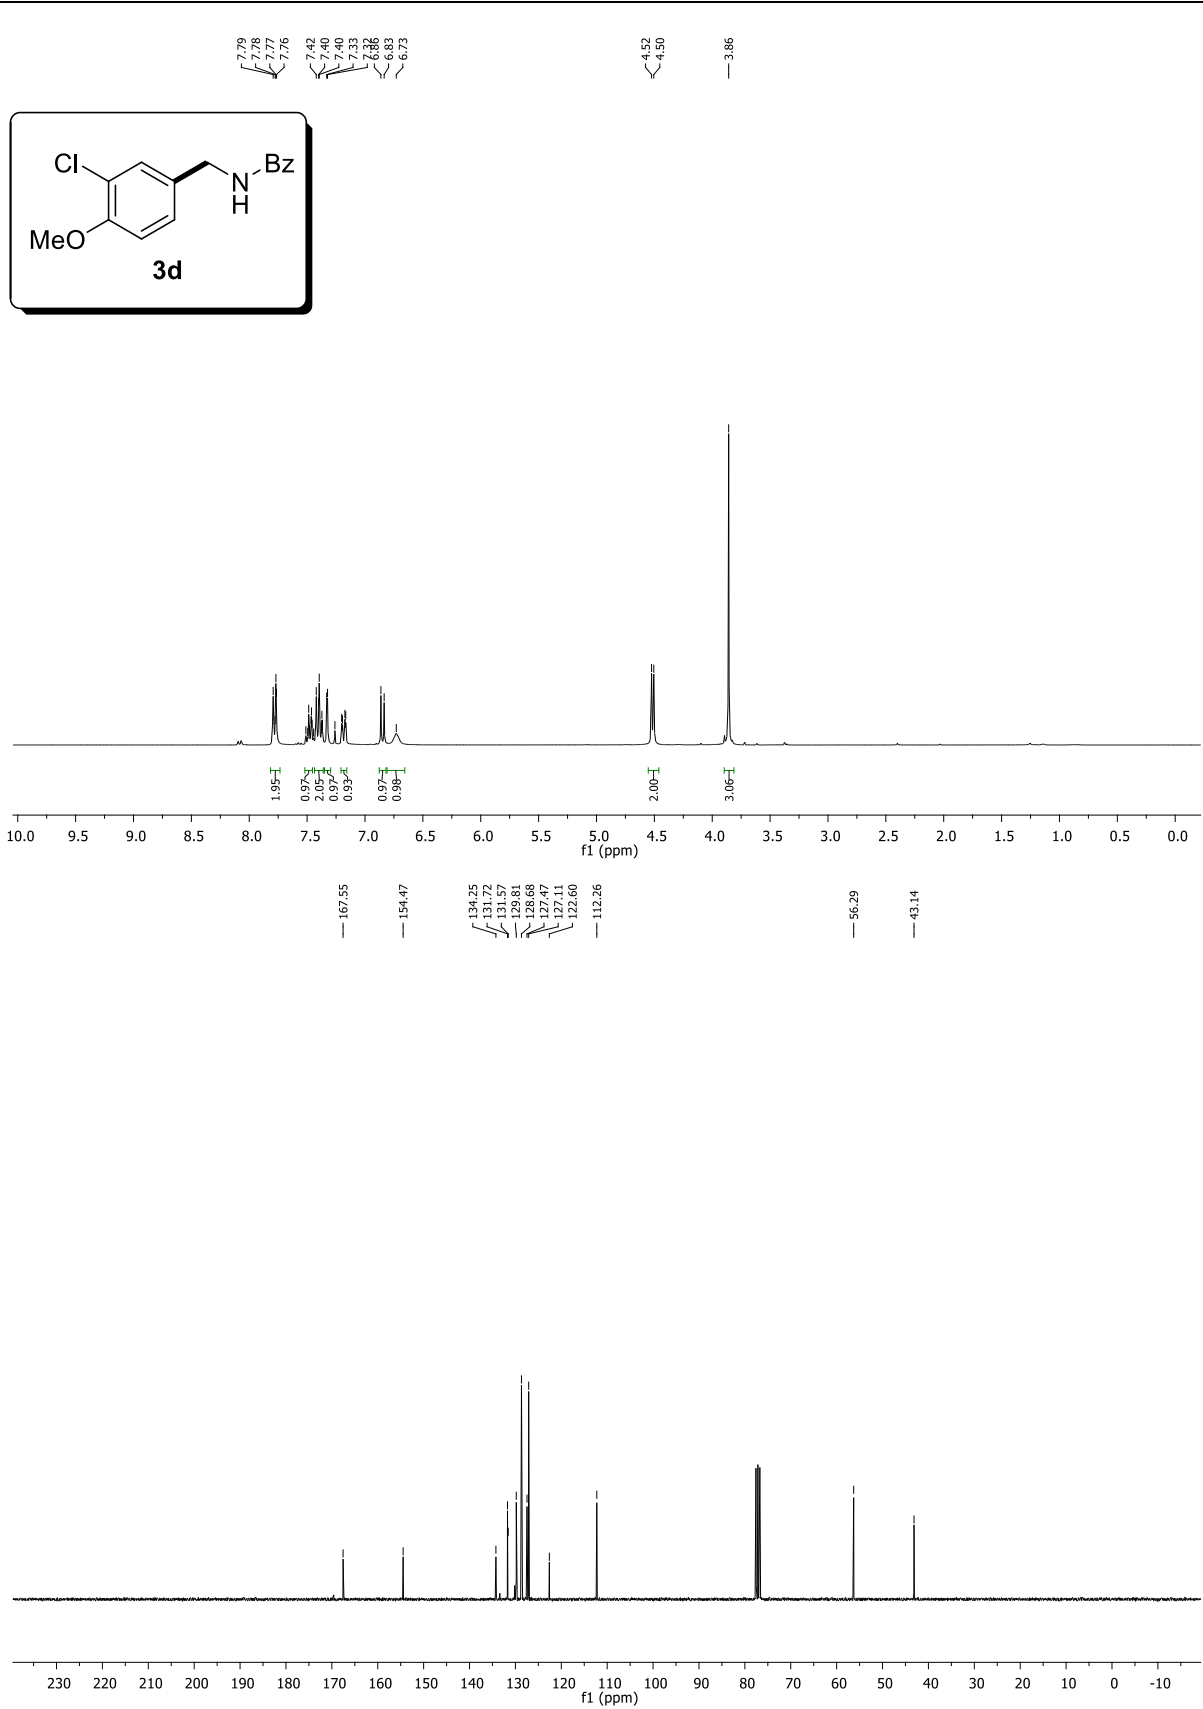



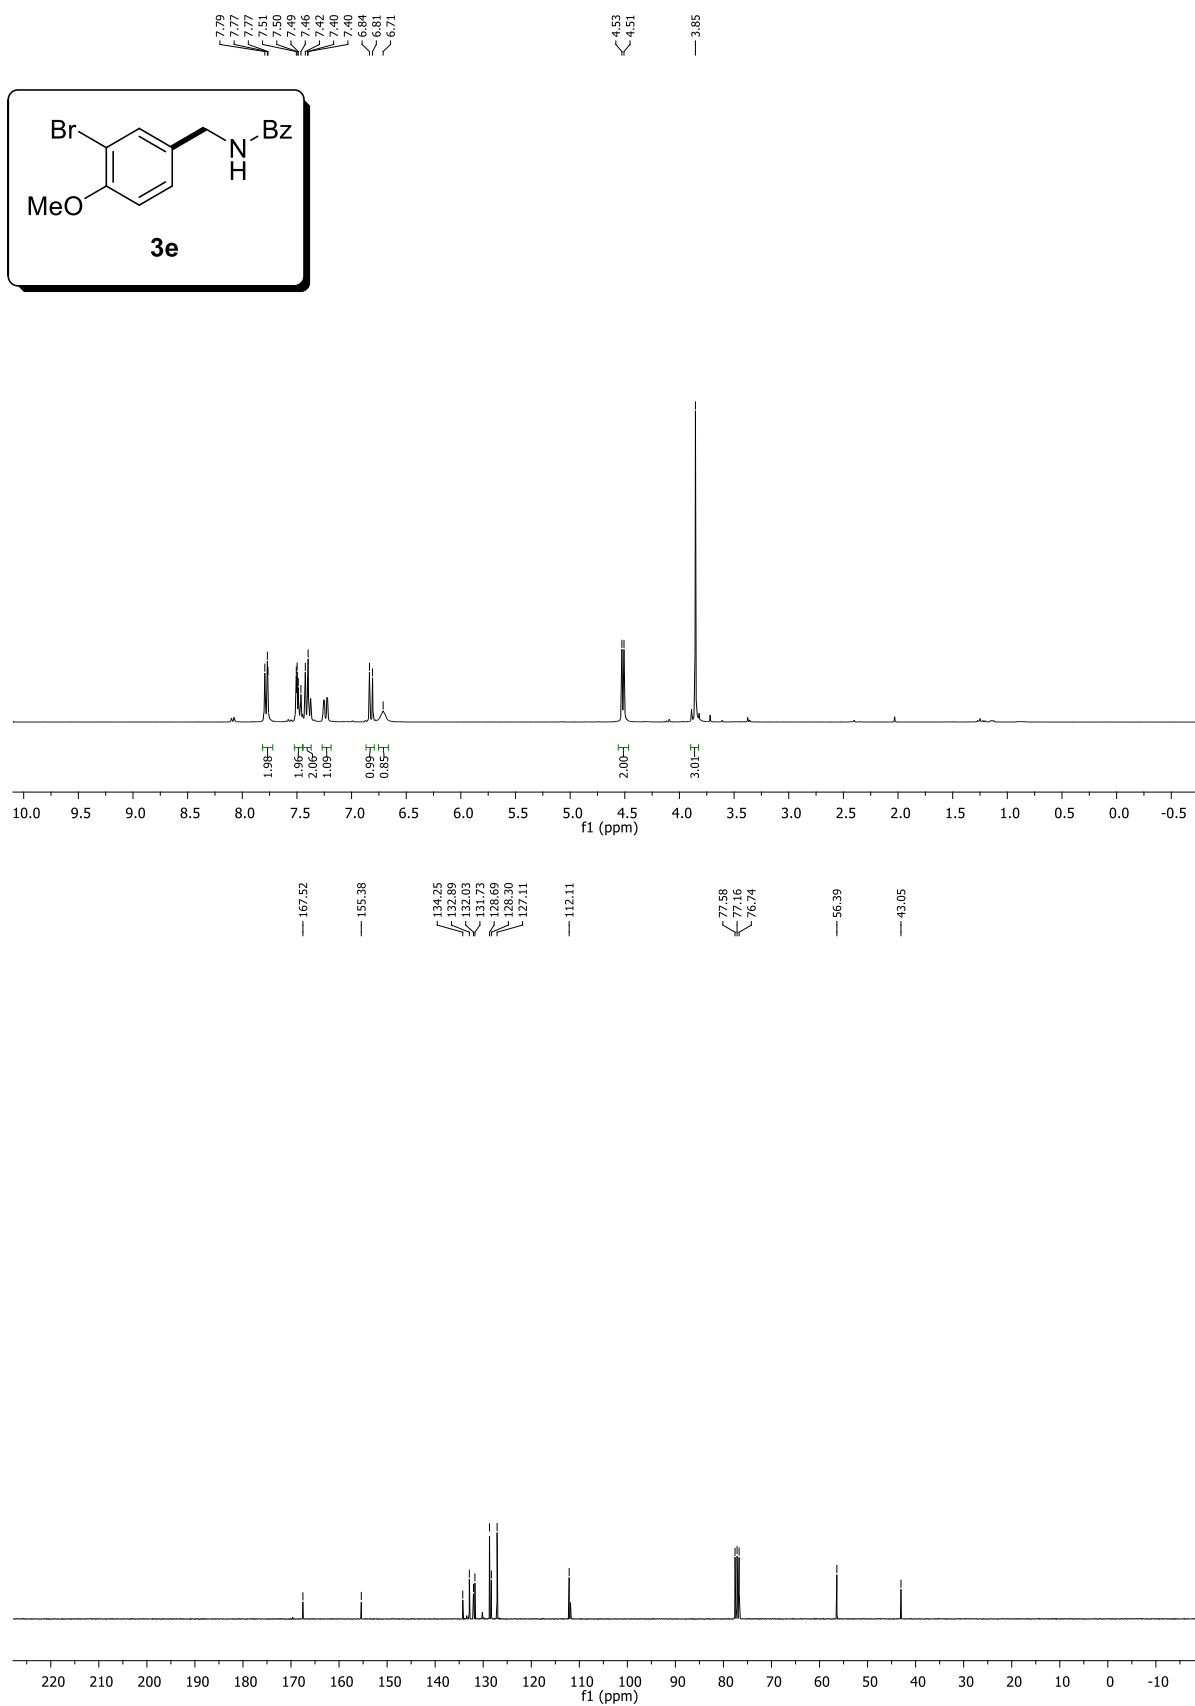

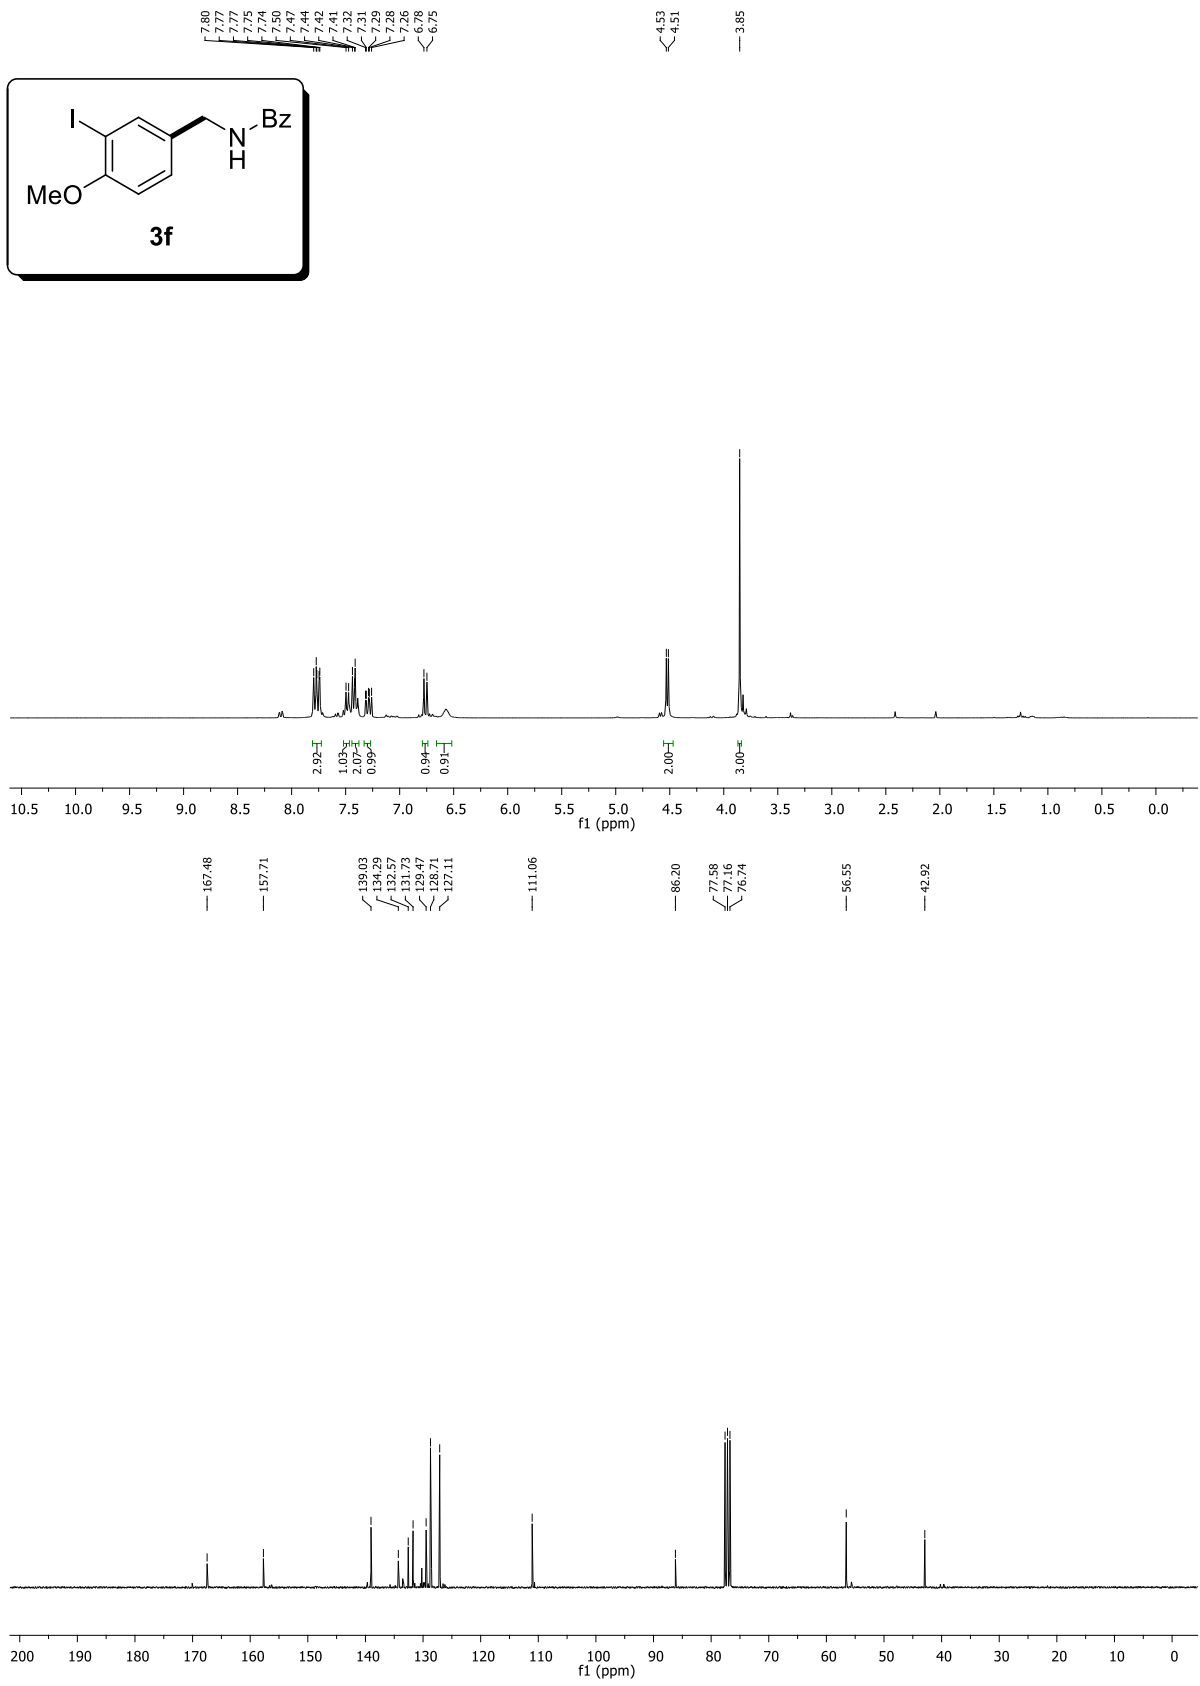

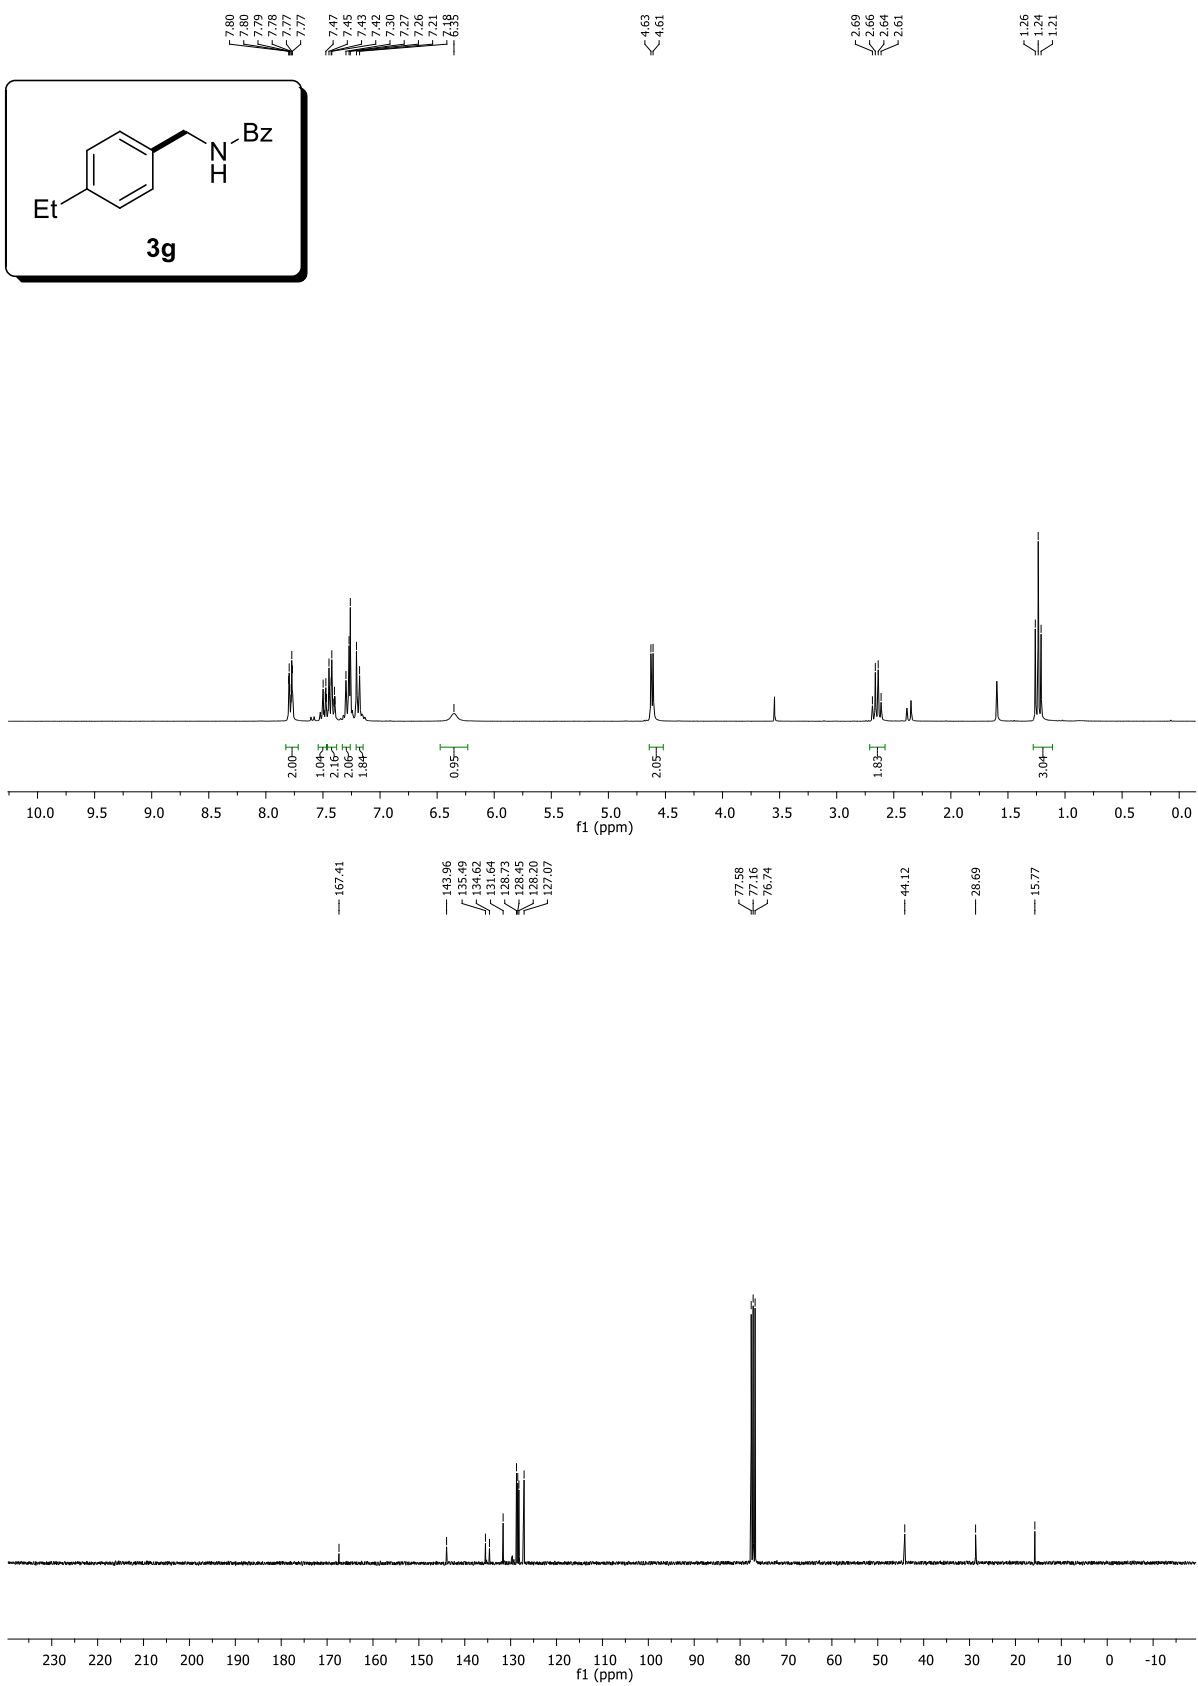

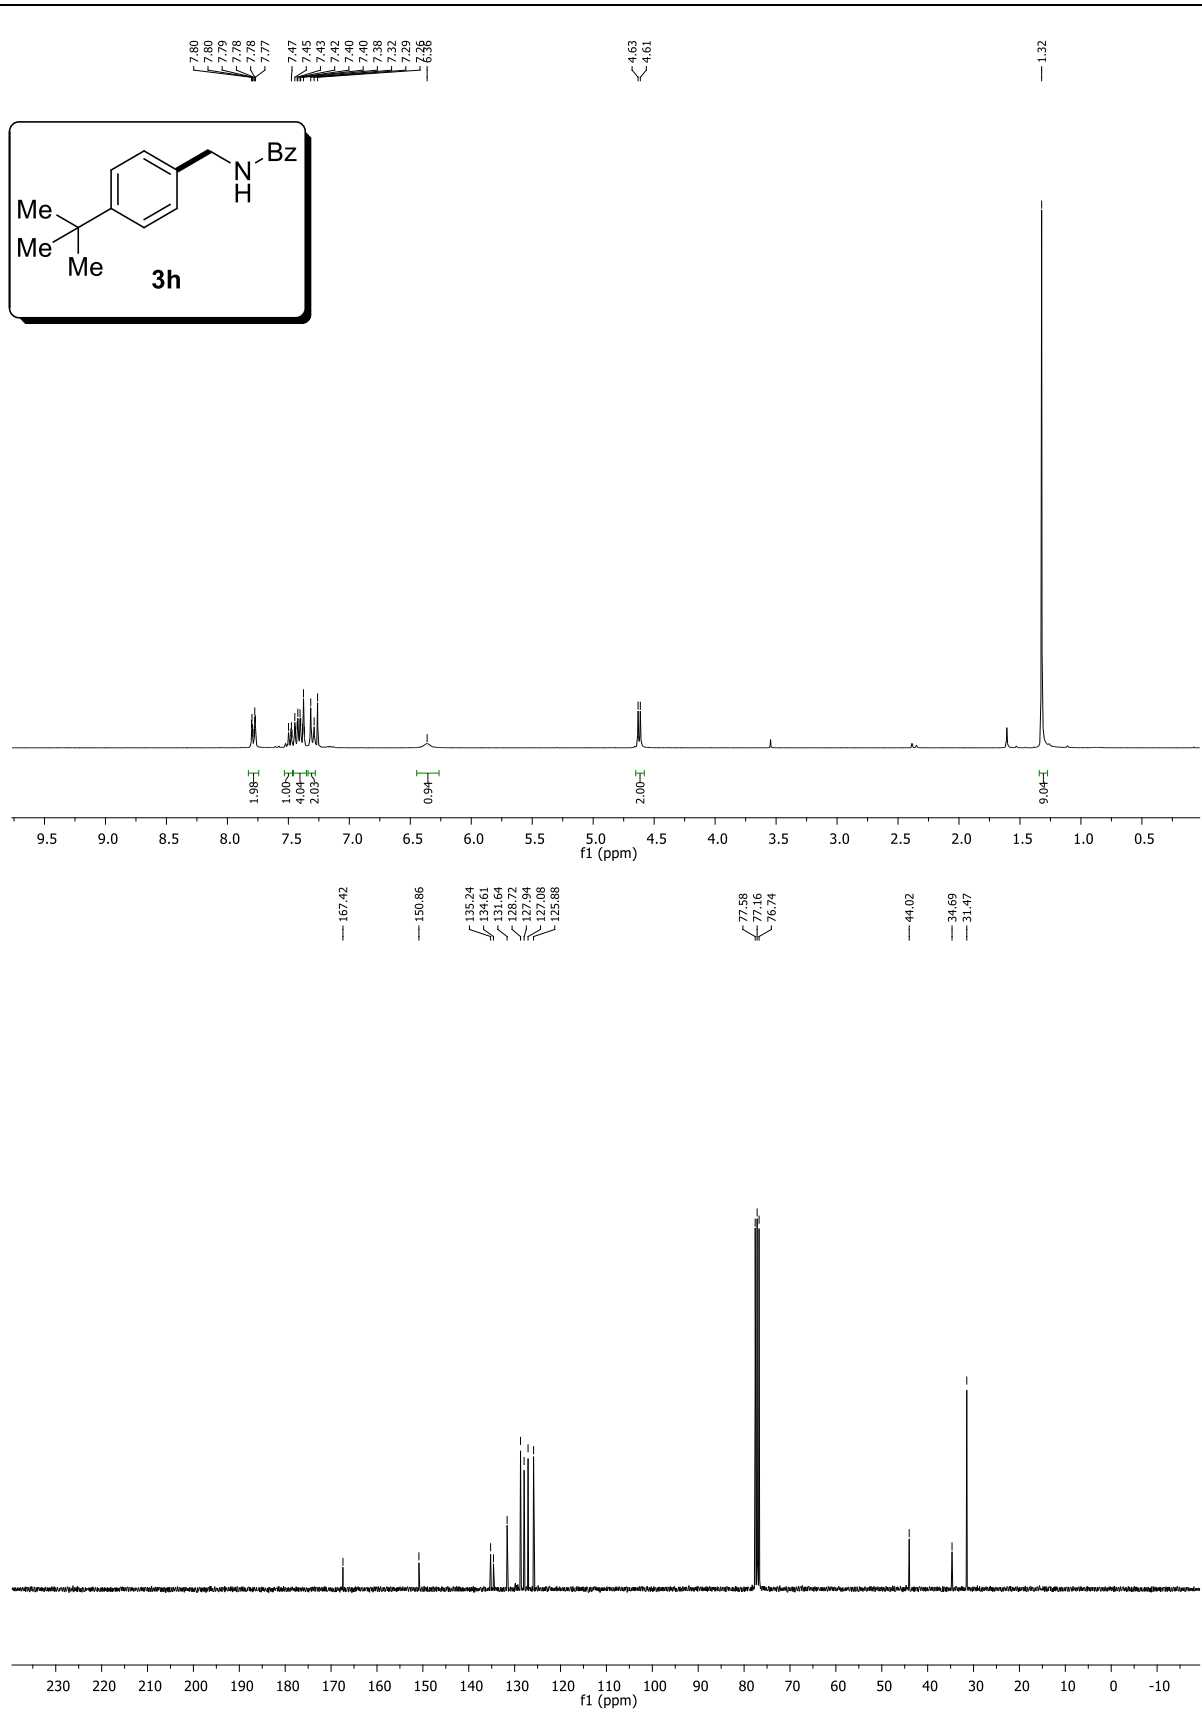

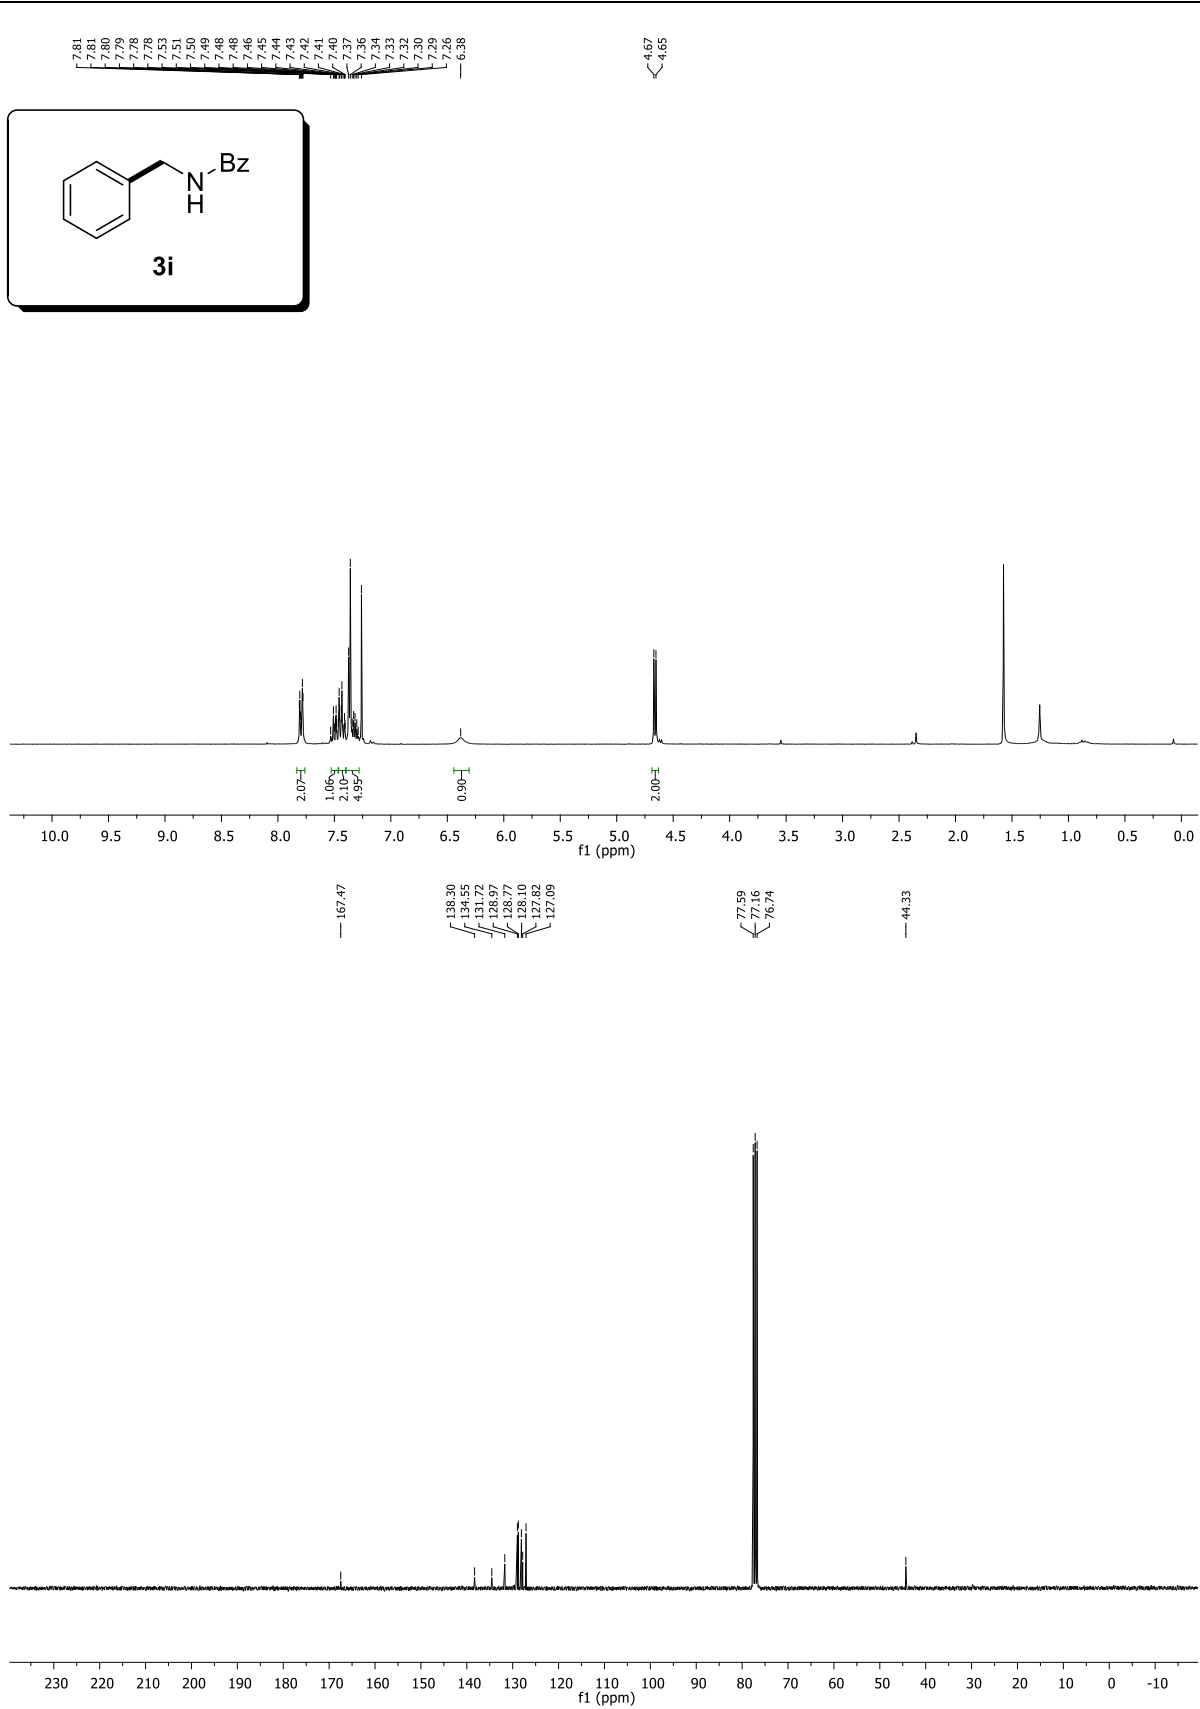

8.11  
8.08  
7.92  
7.89  
7.89  
7.86  
7.84  
7.77  
7.75  
7.74  
7.57  
7.55  
7.54  
7.53  
7.52  
7.52  
7.50  
7.48  
7.47  
7.46  
7.46  
7.45  
7.43  
7.42  
7.40  
7.39  
7.39  
6.34

5.11  
5.09

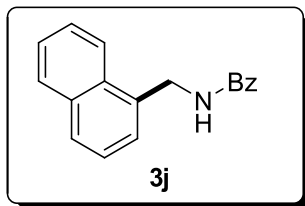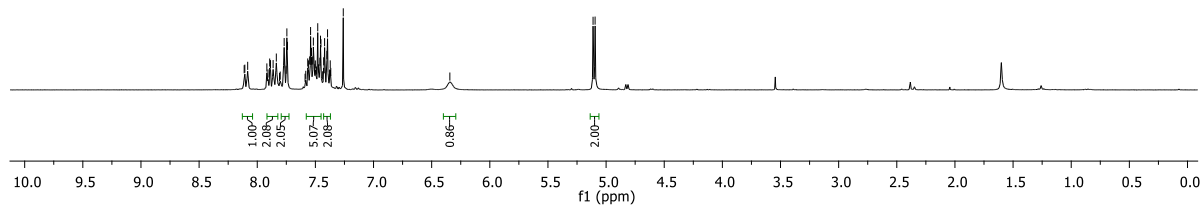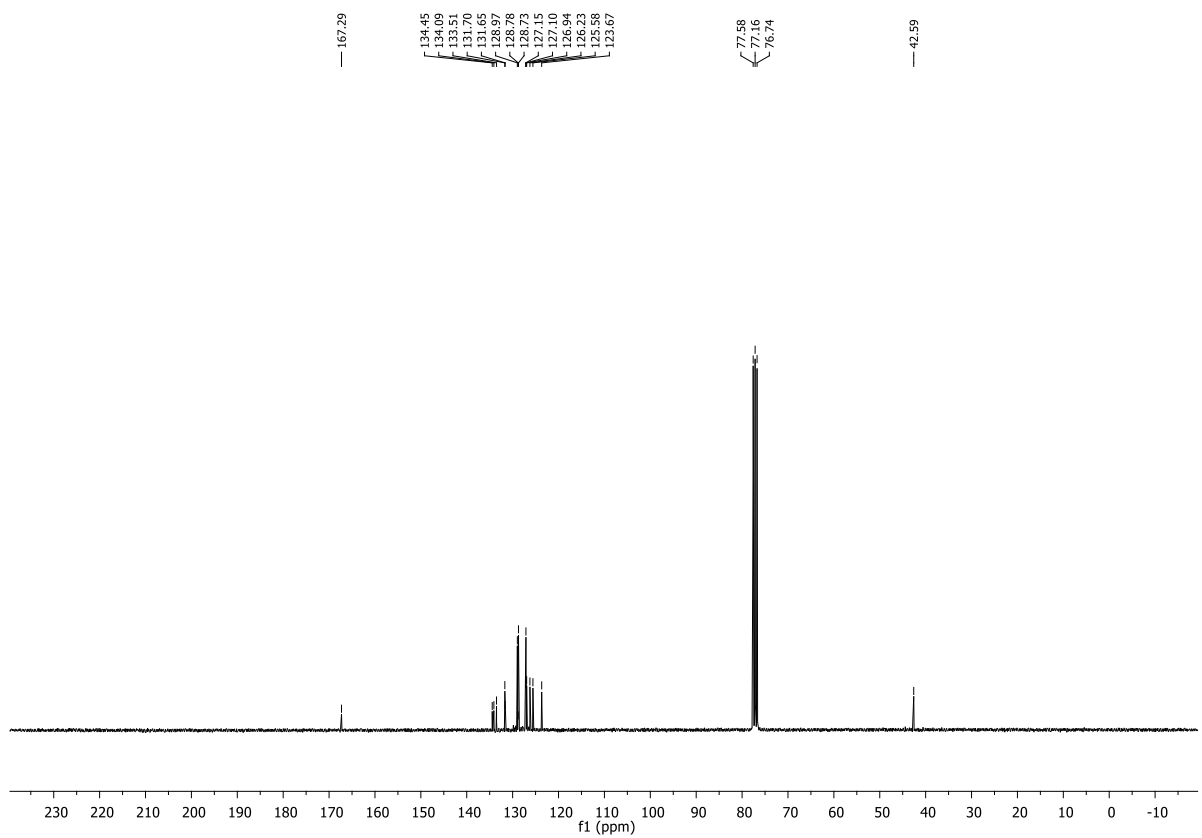

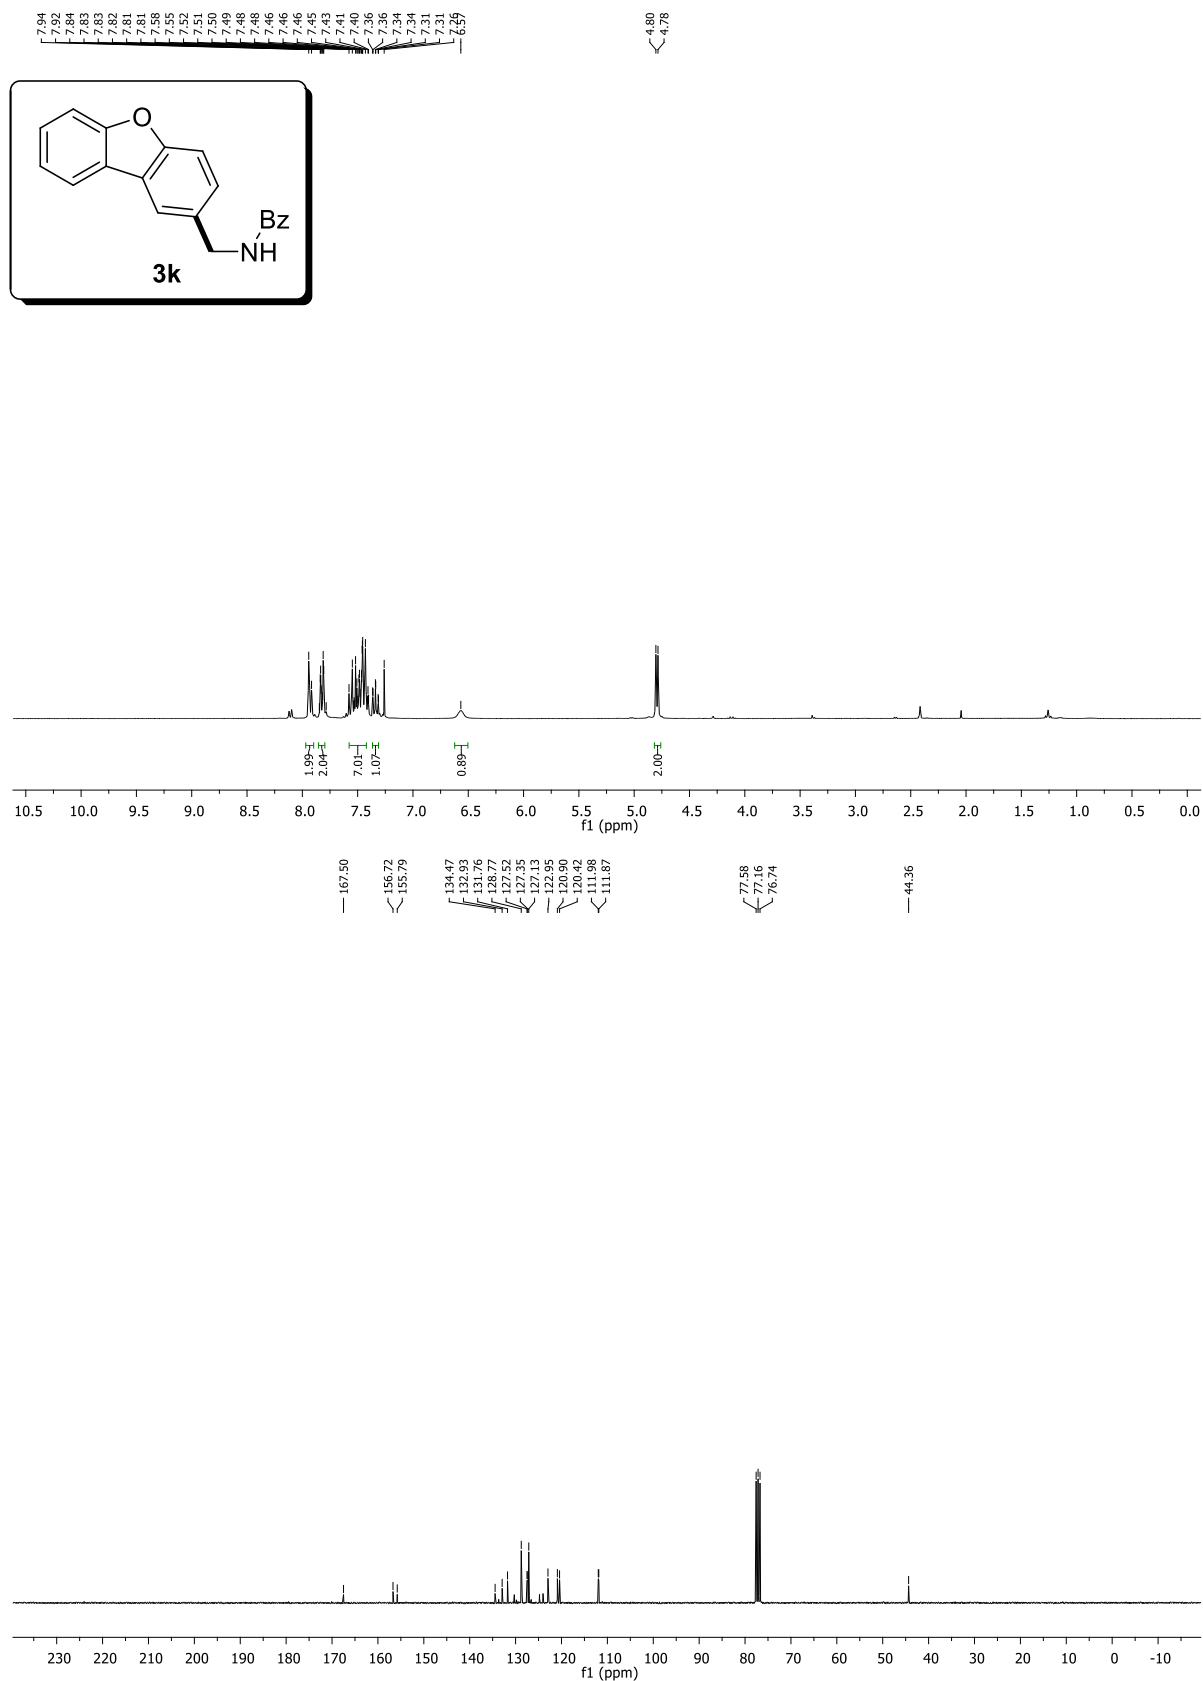

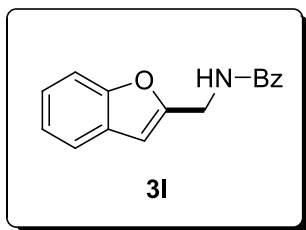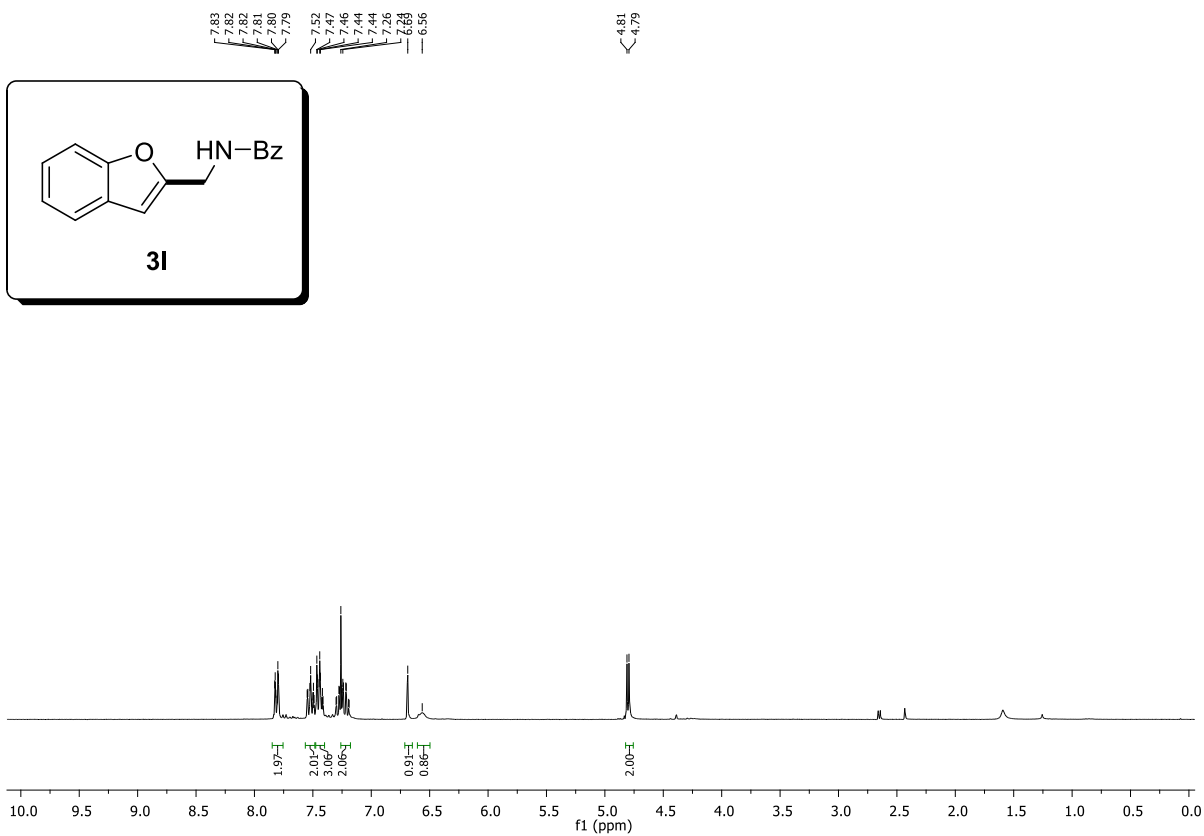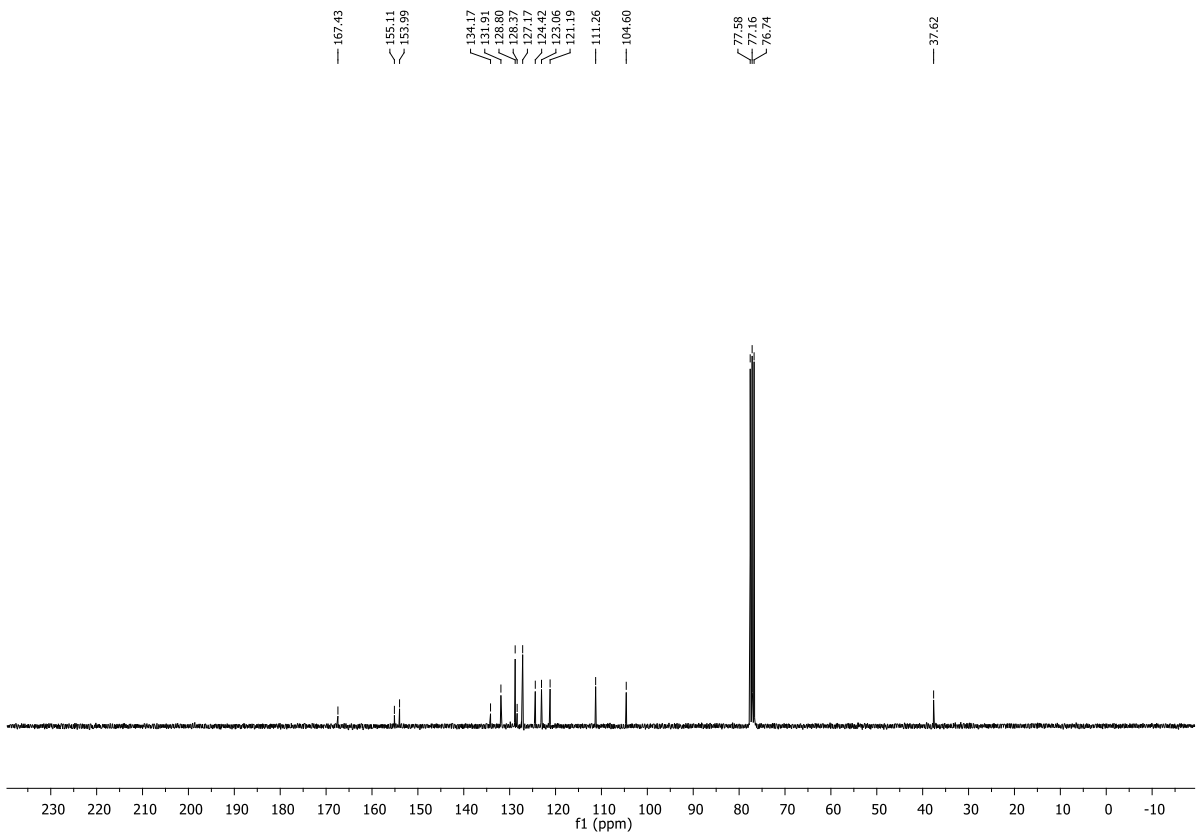



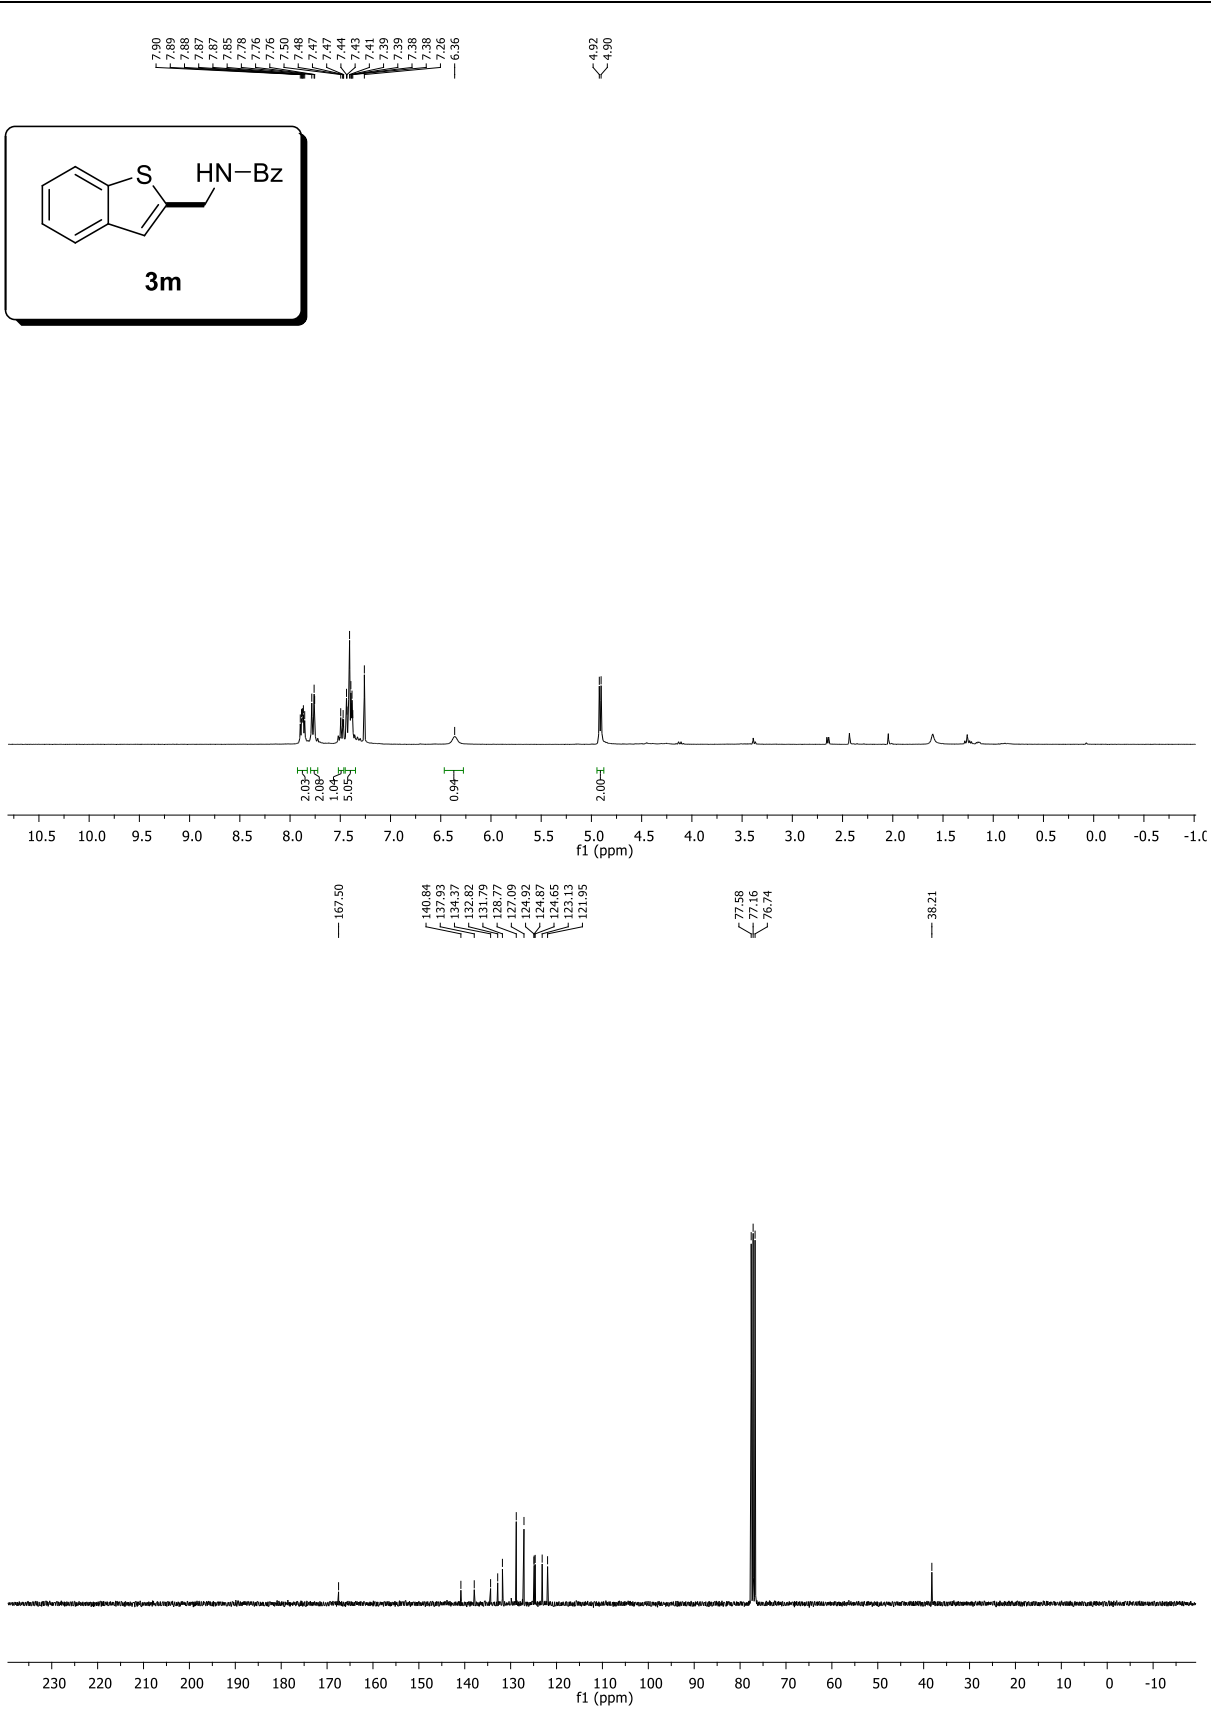

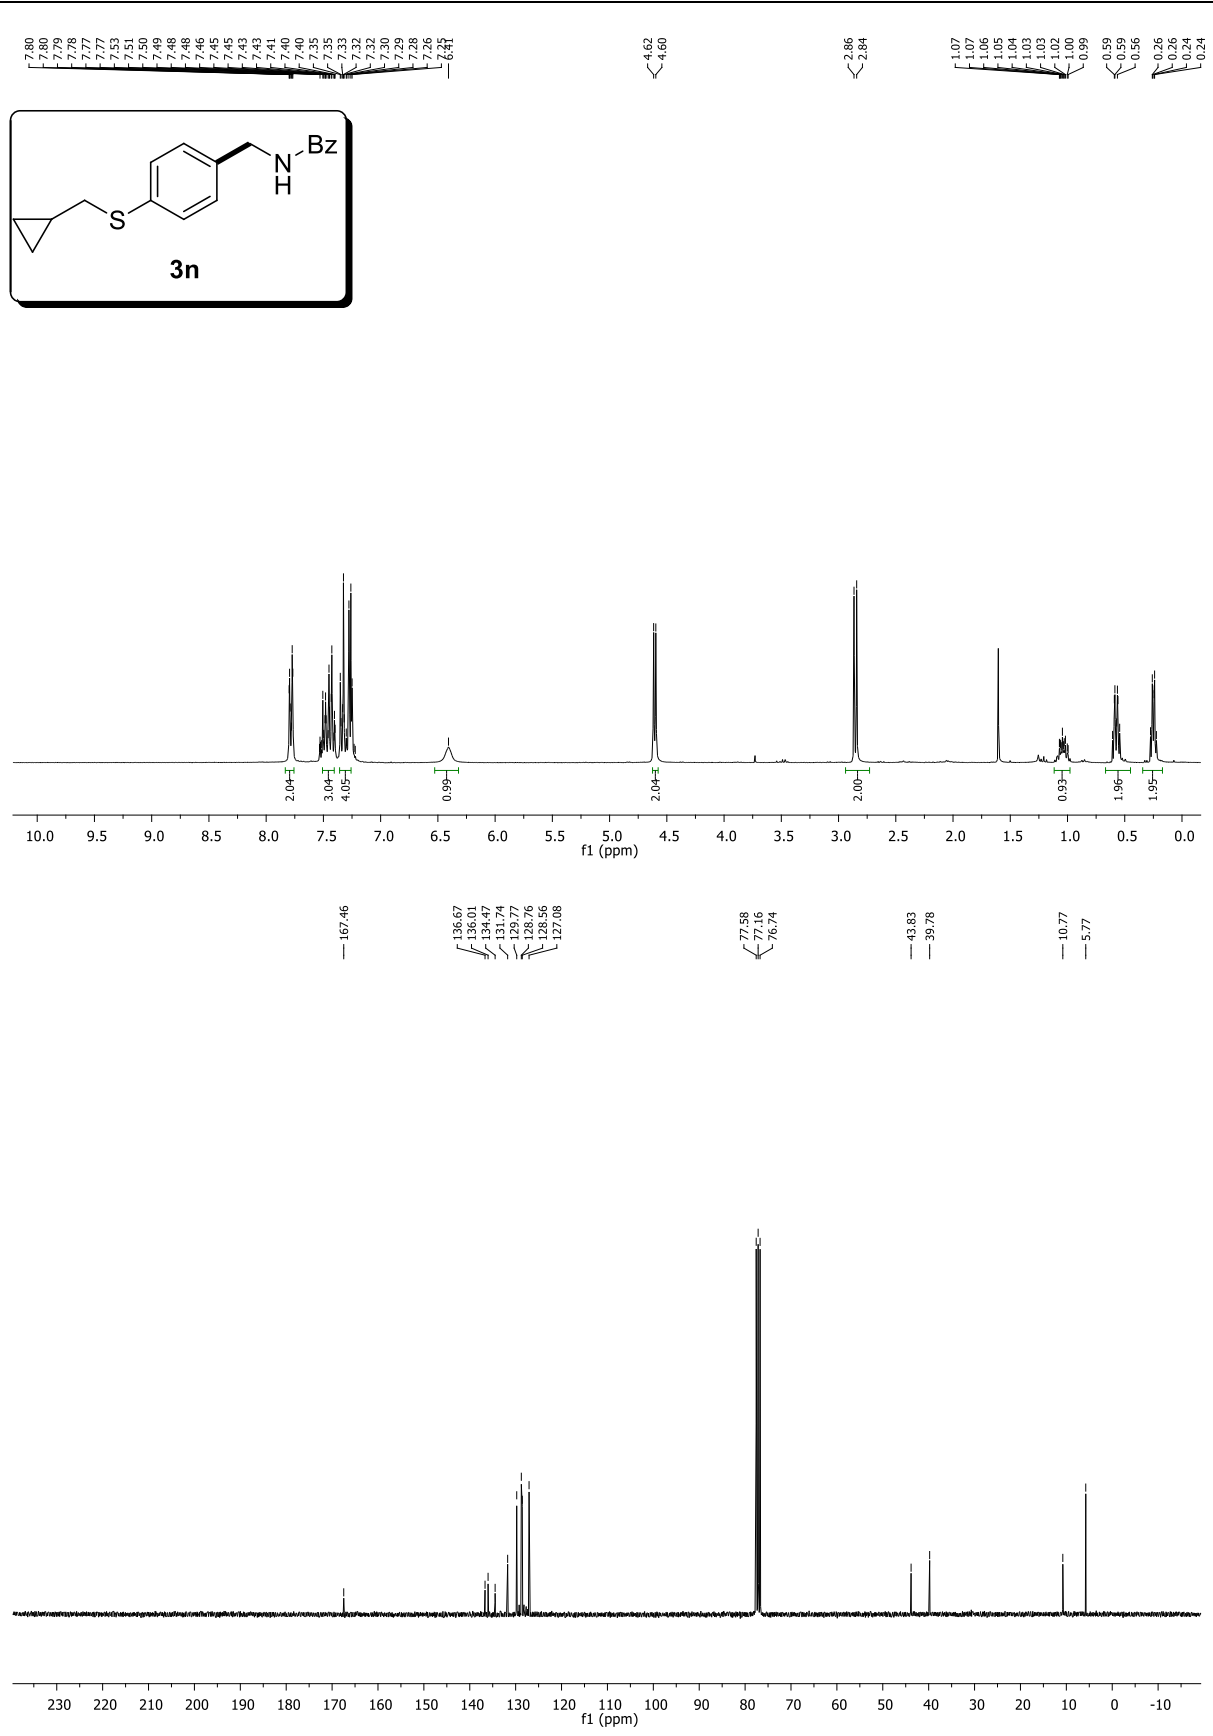

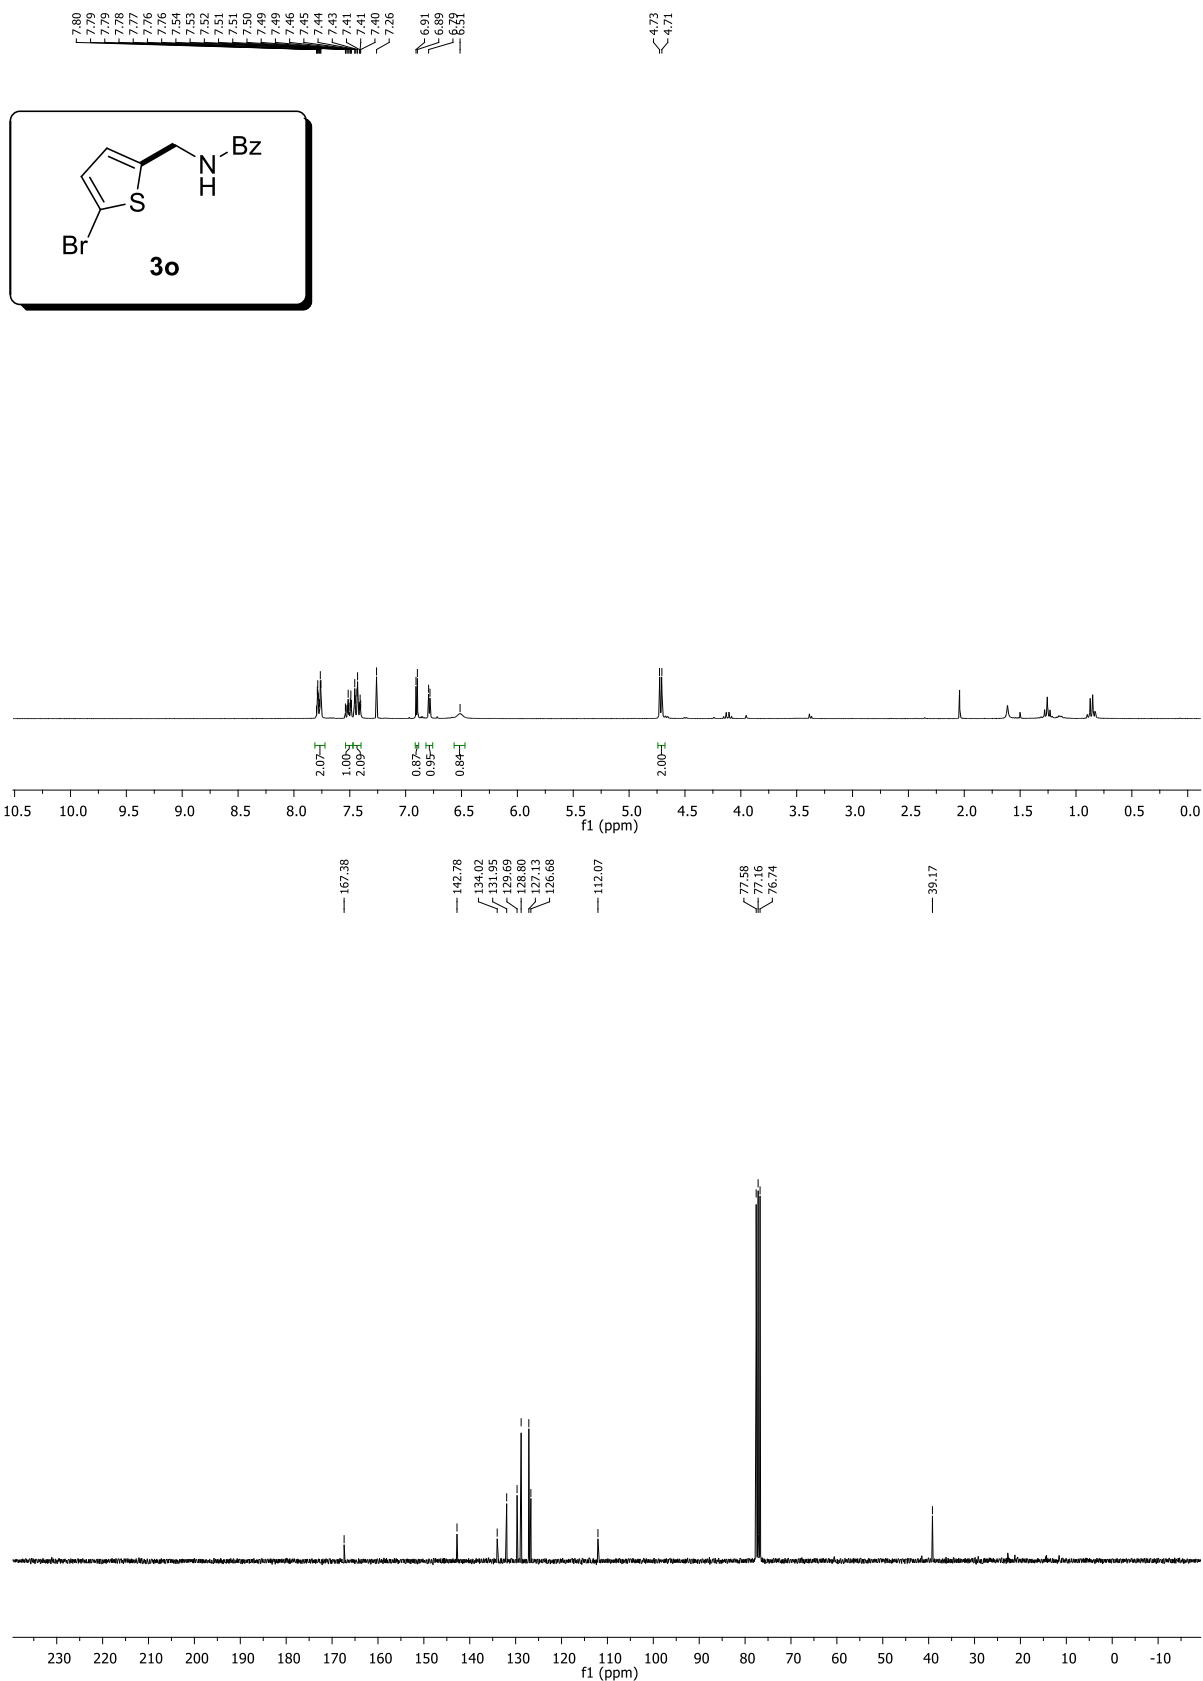

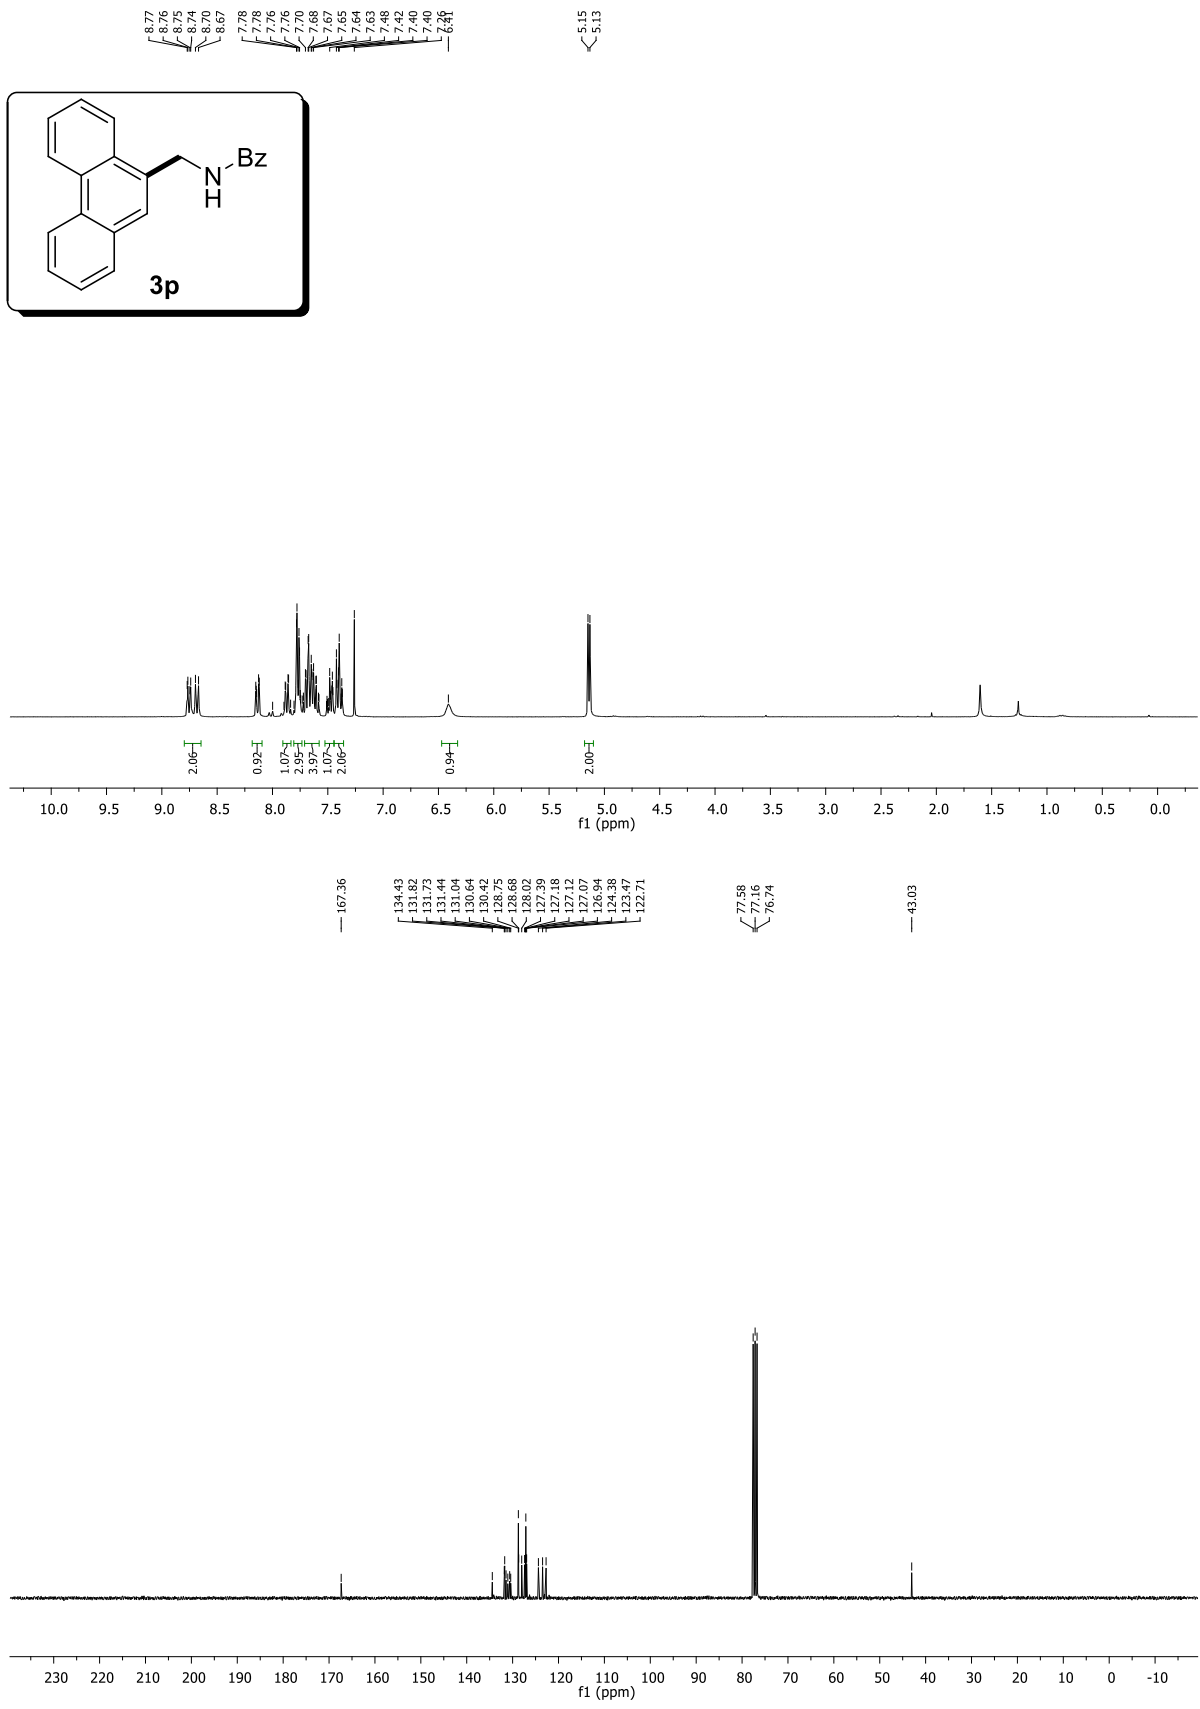

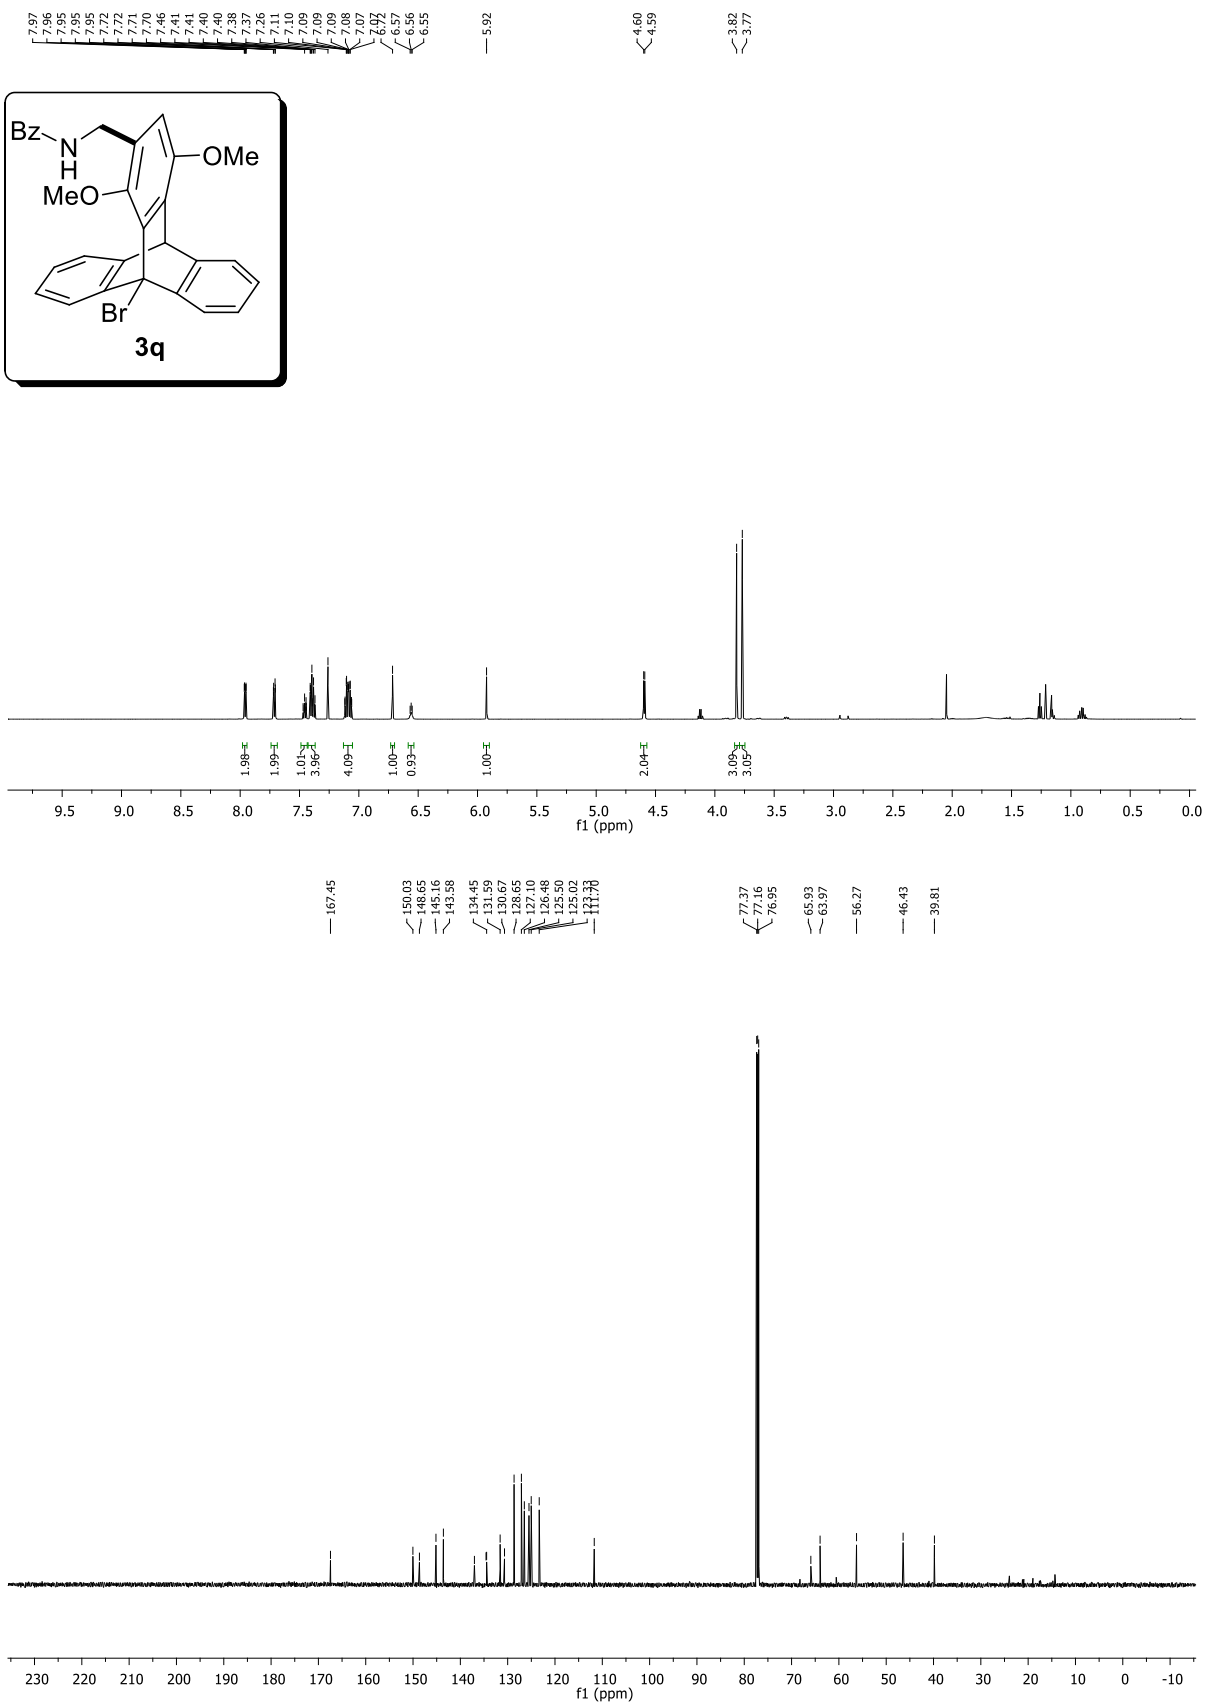

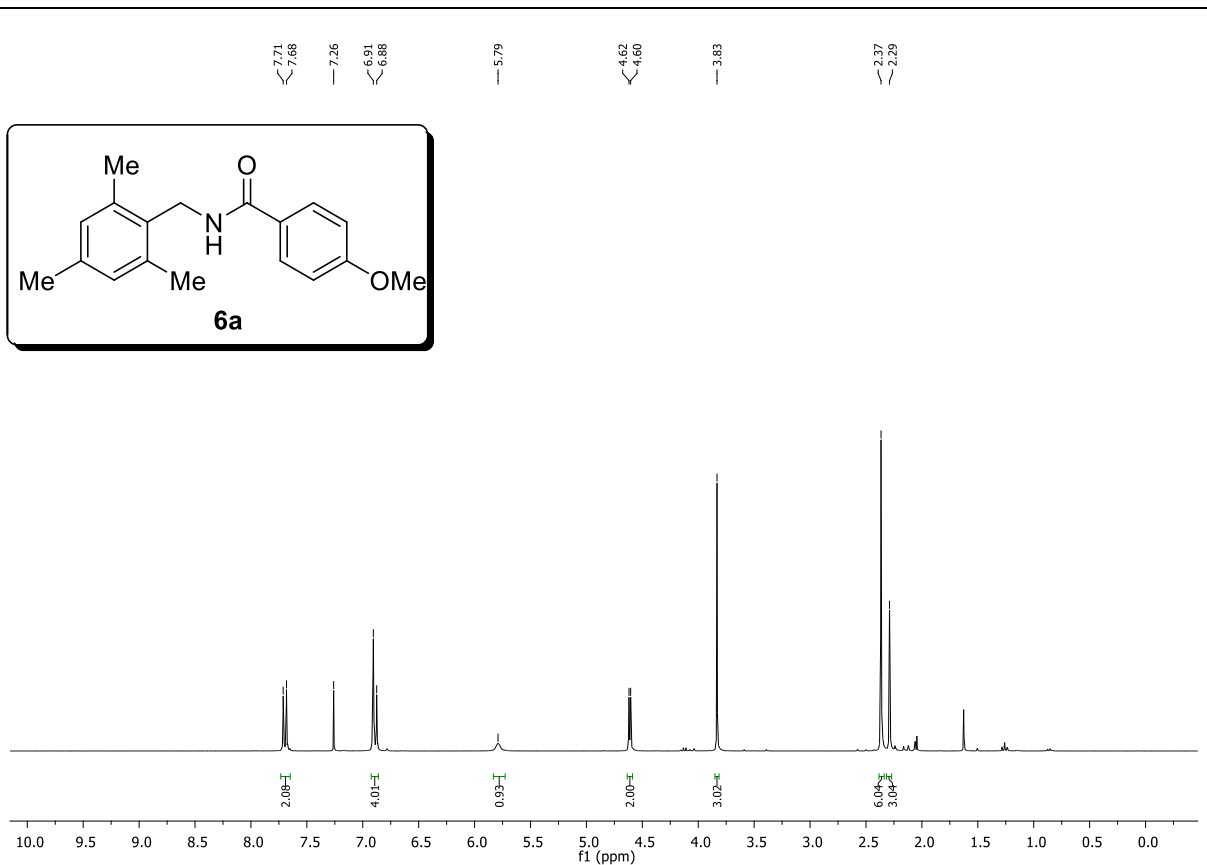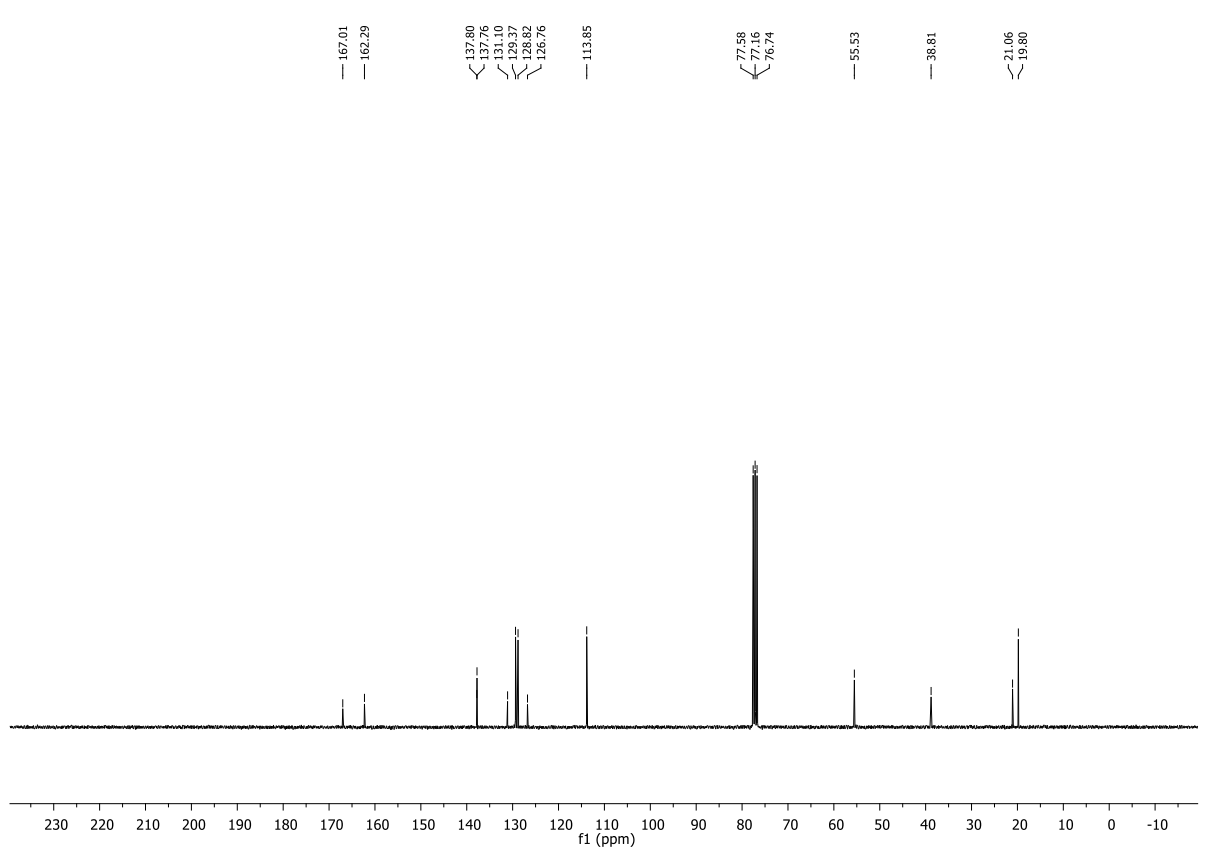

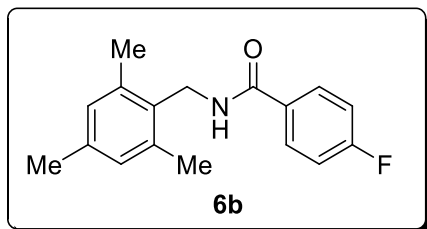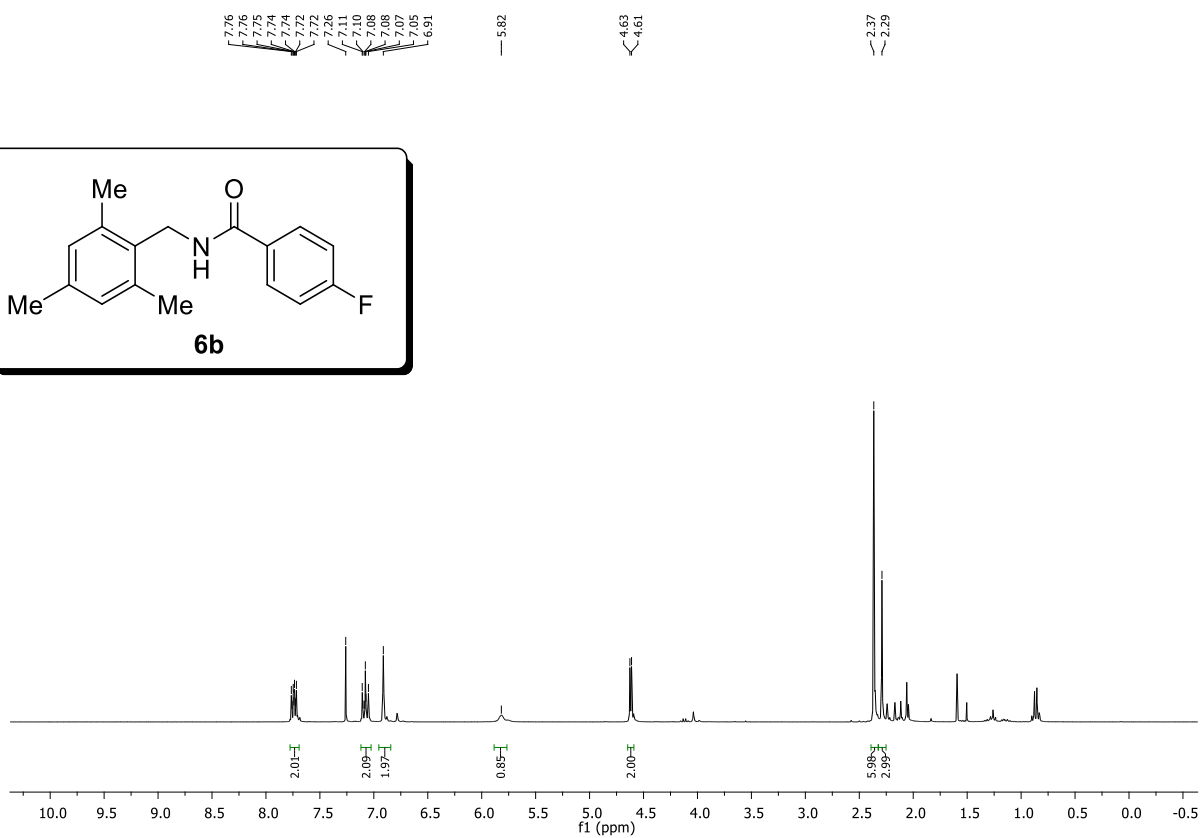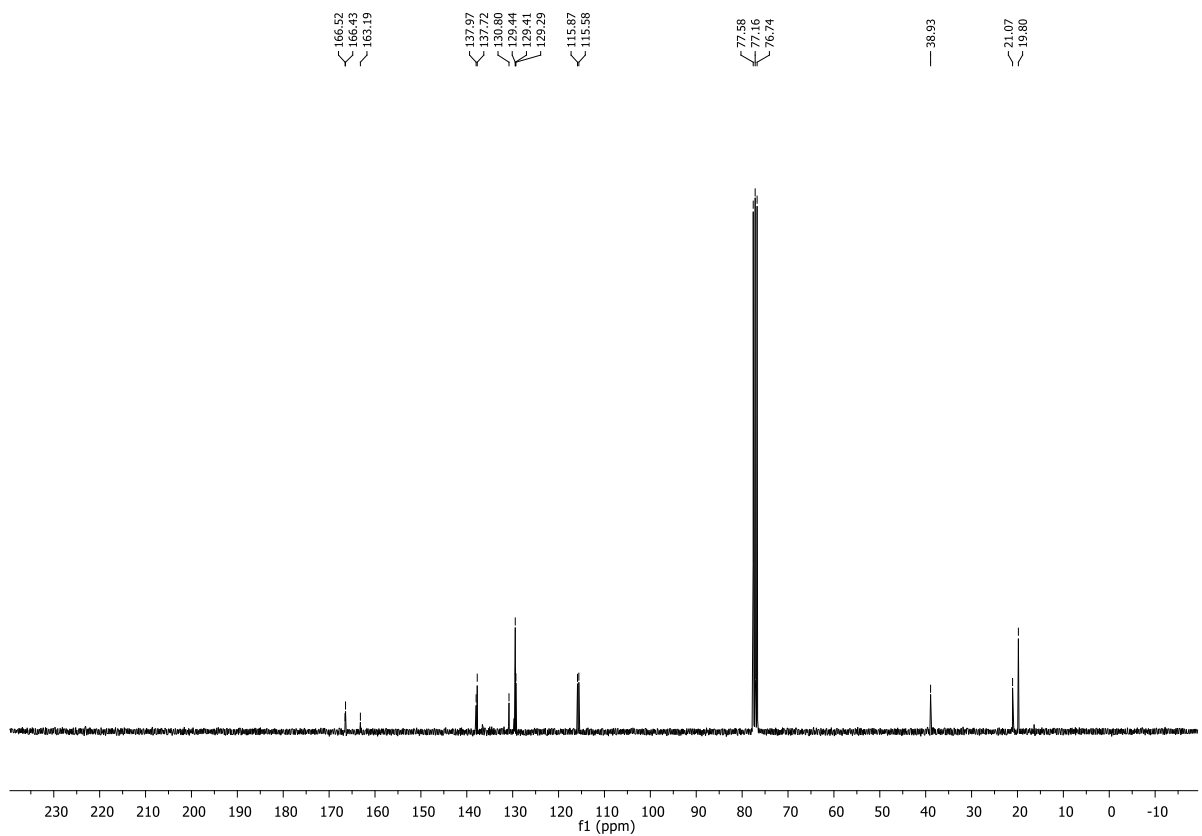

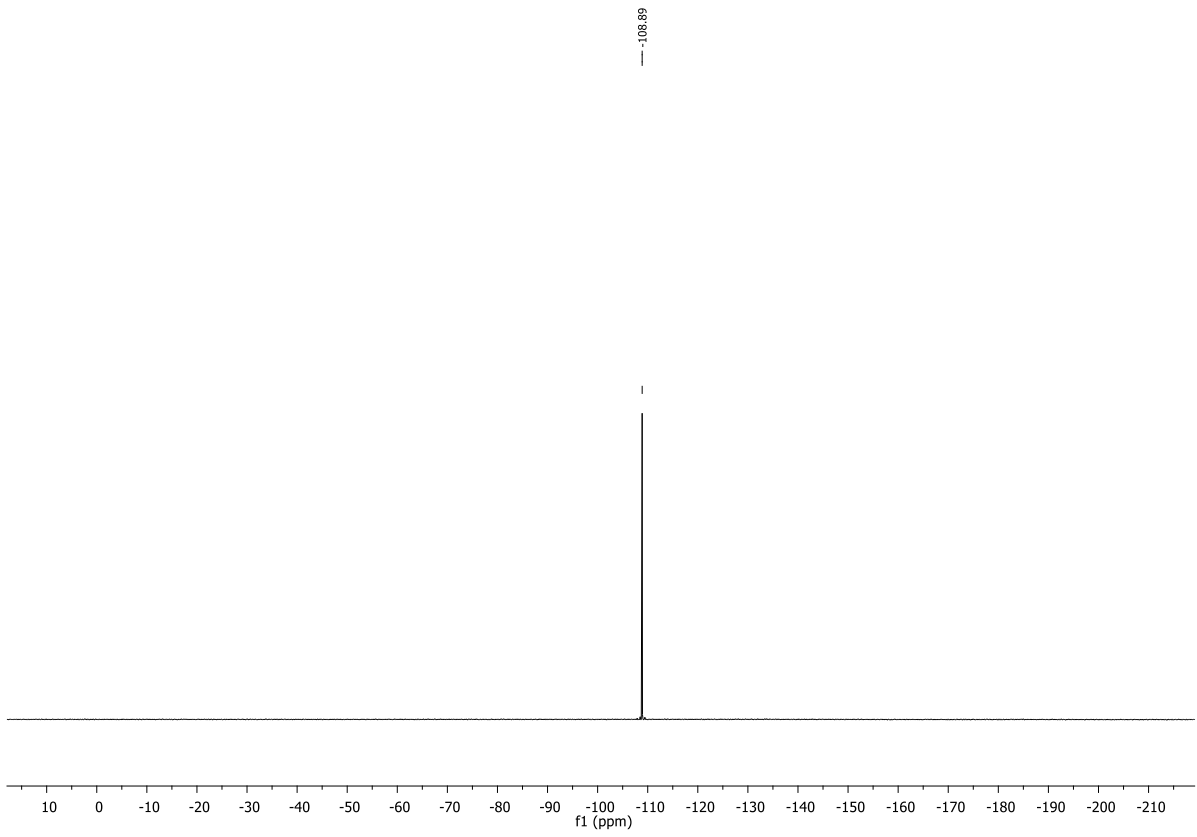



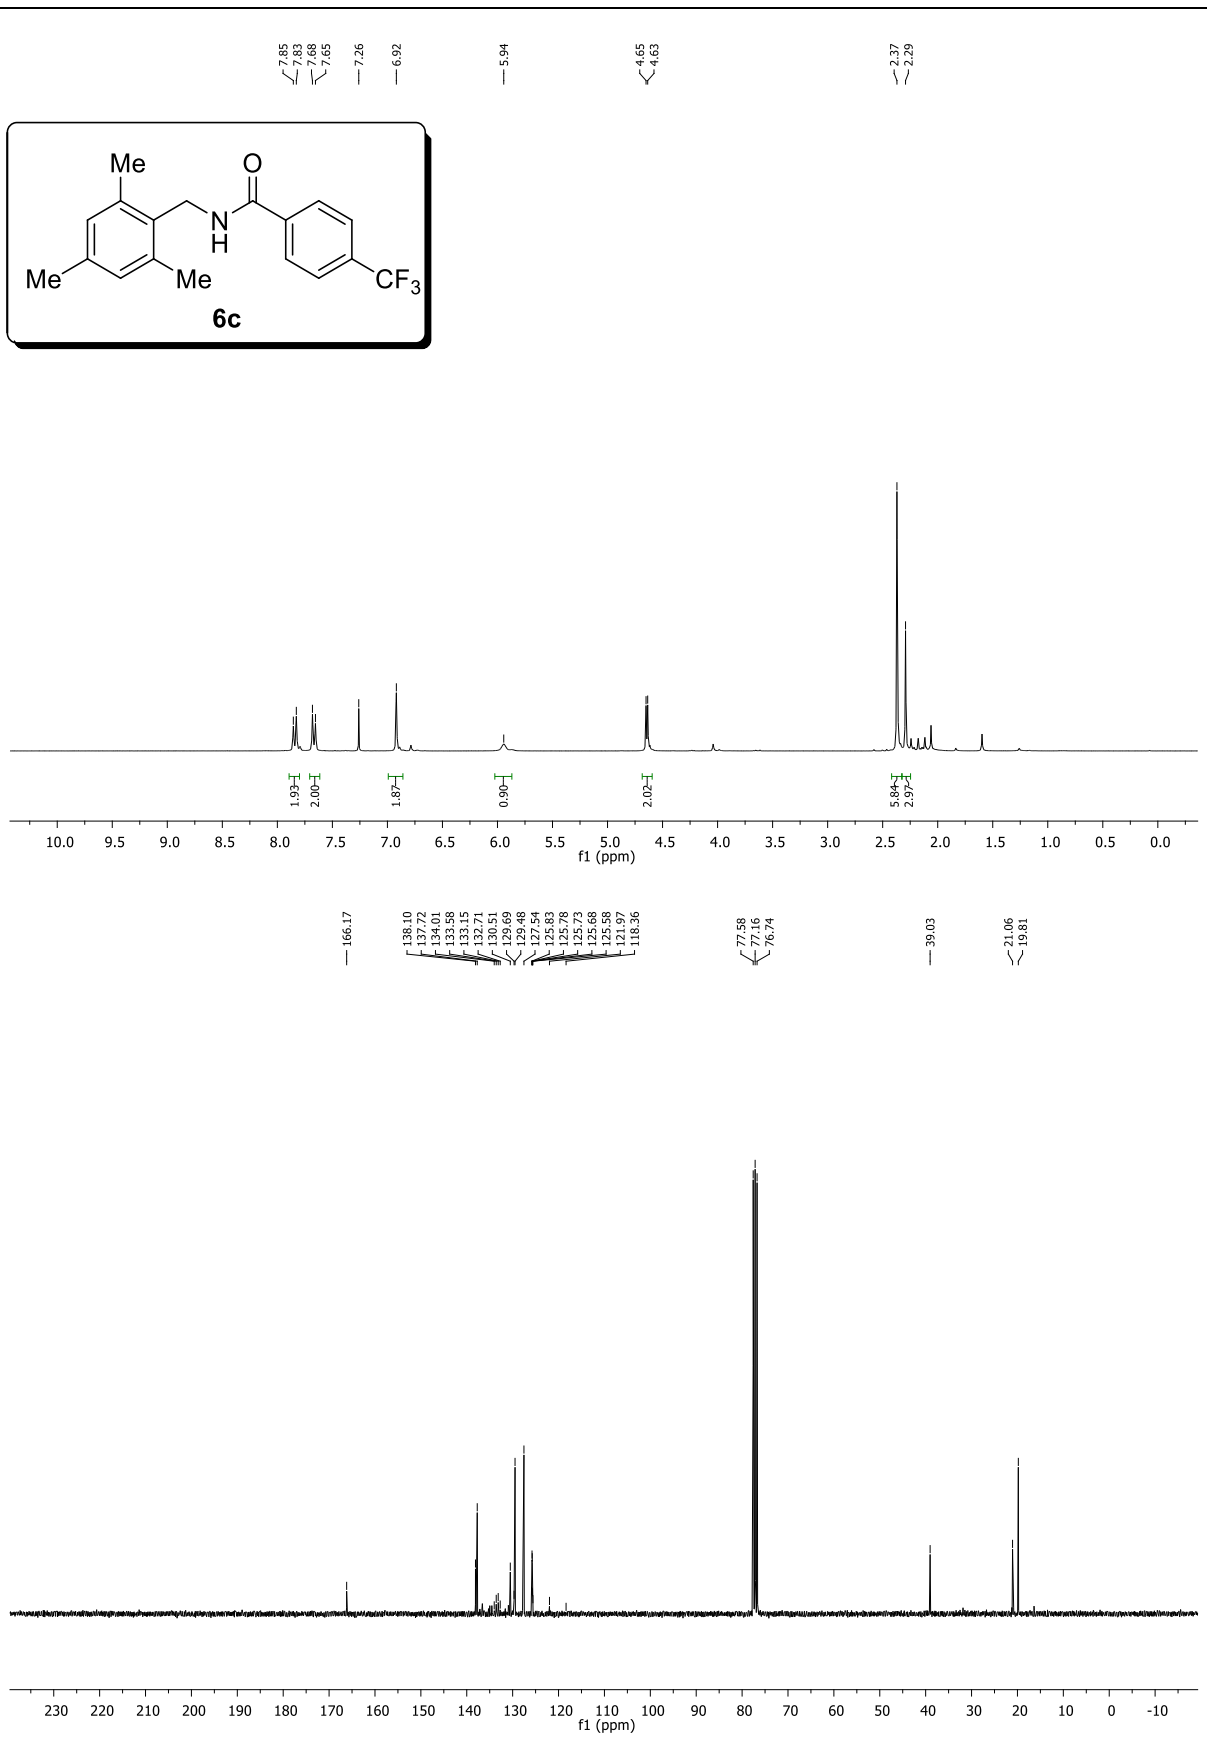

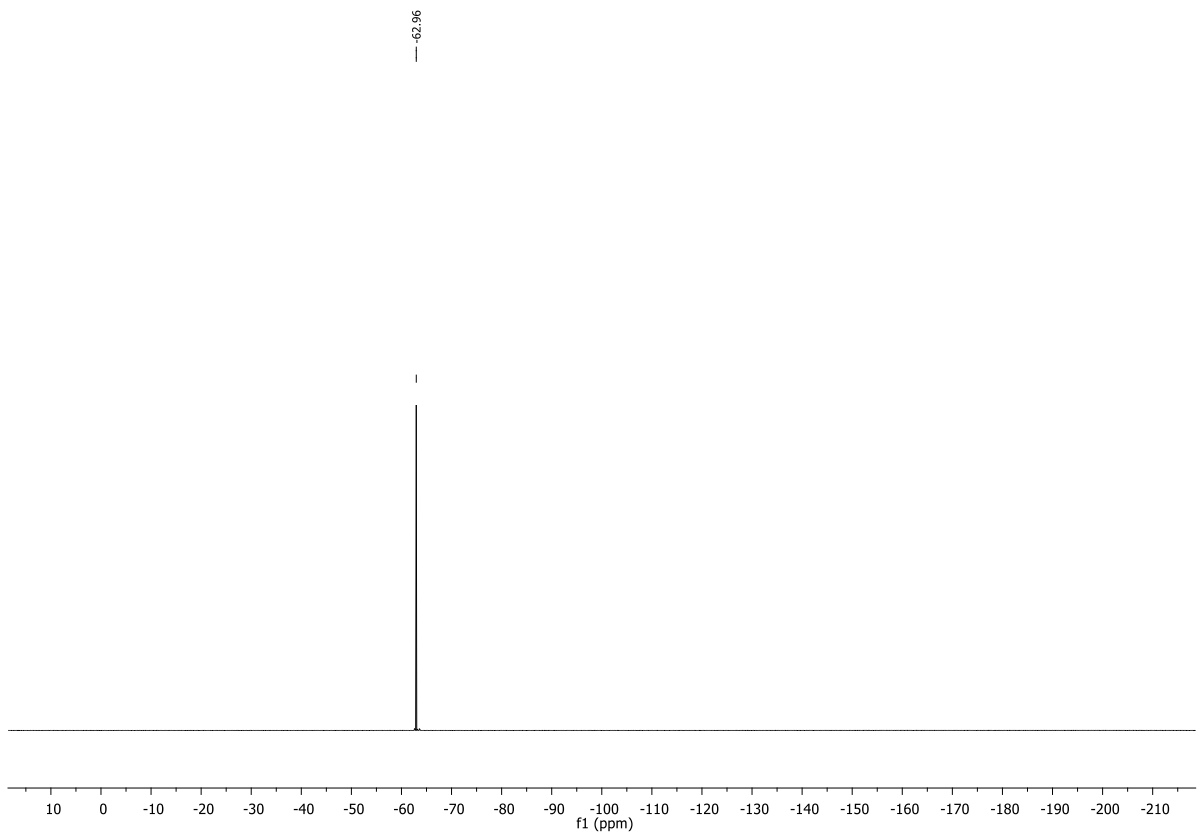

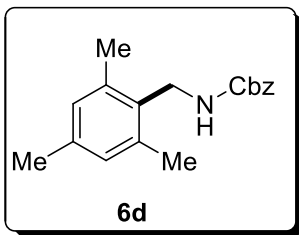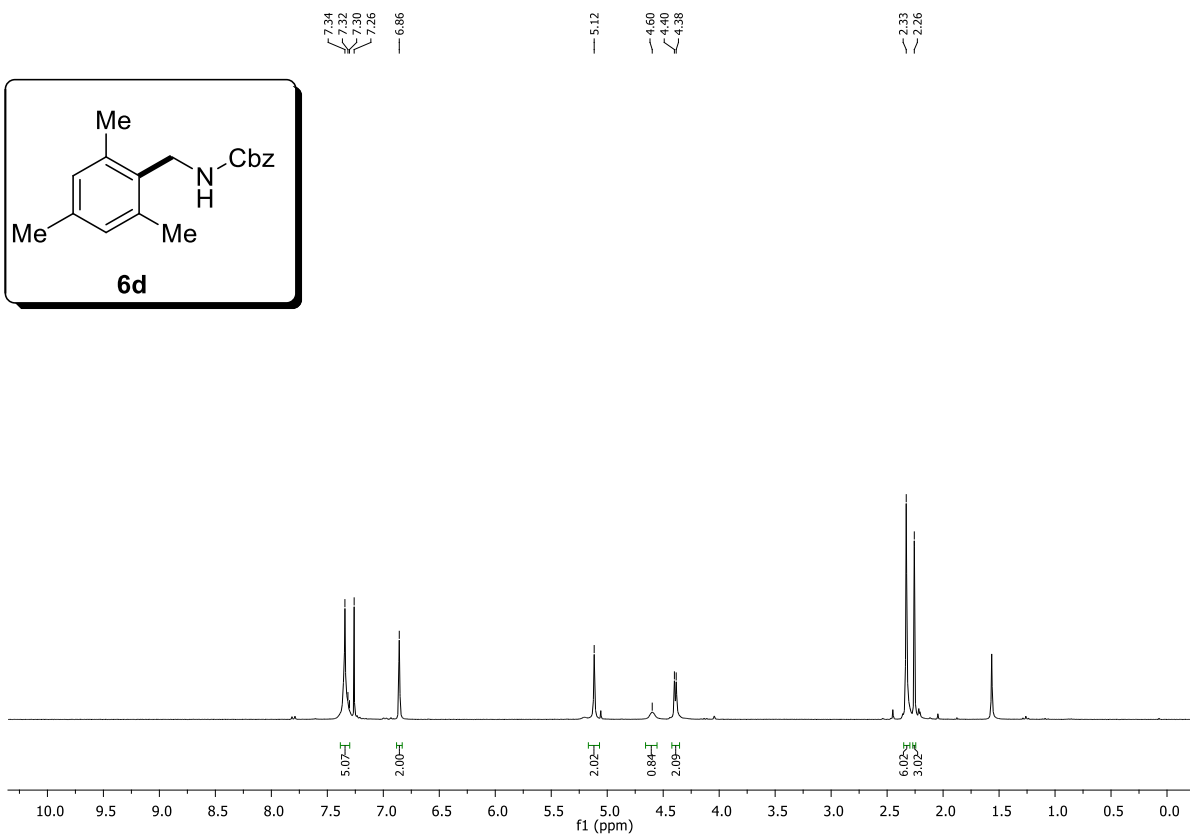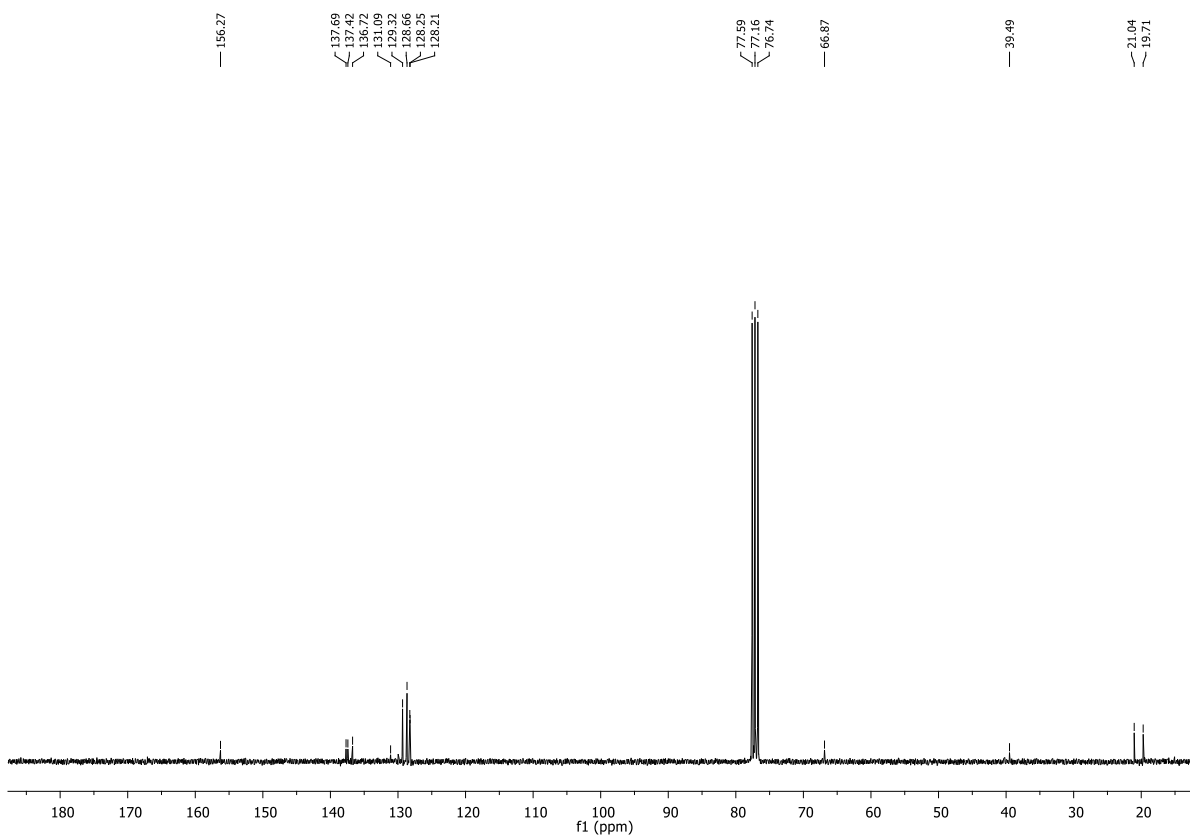

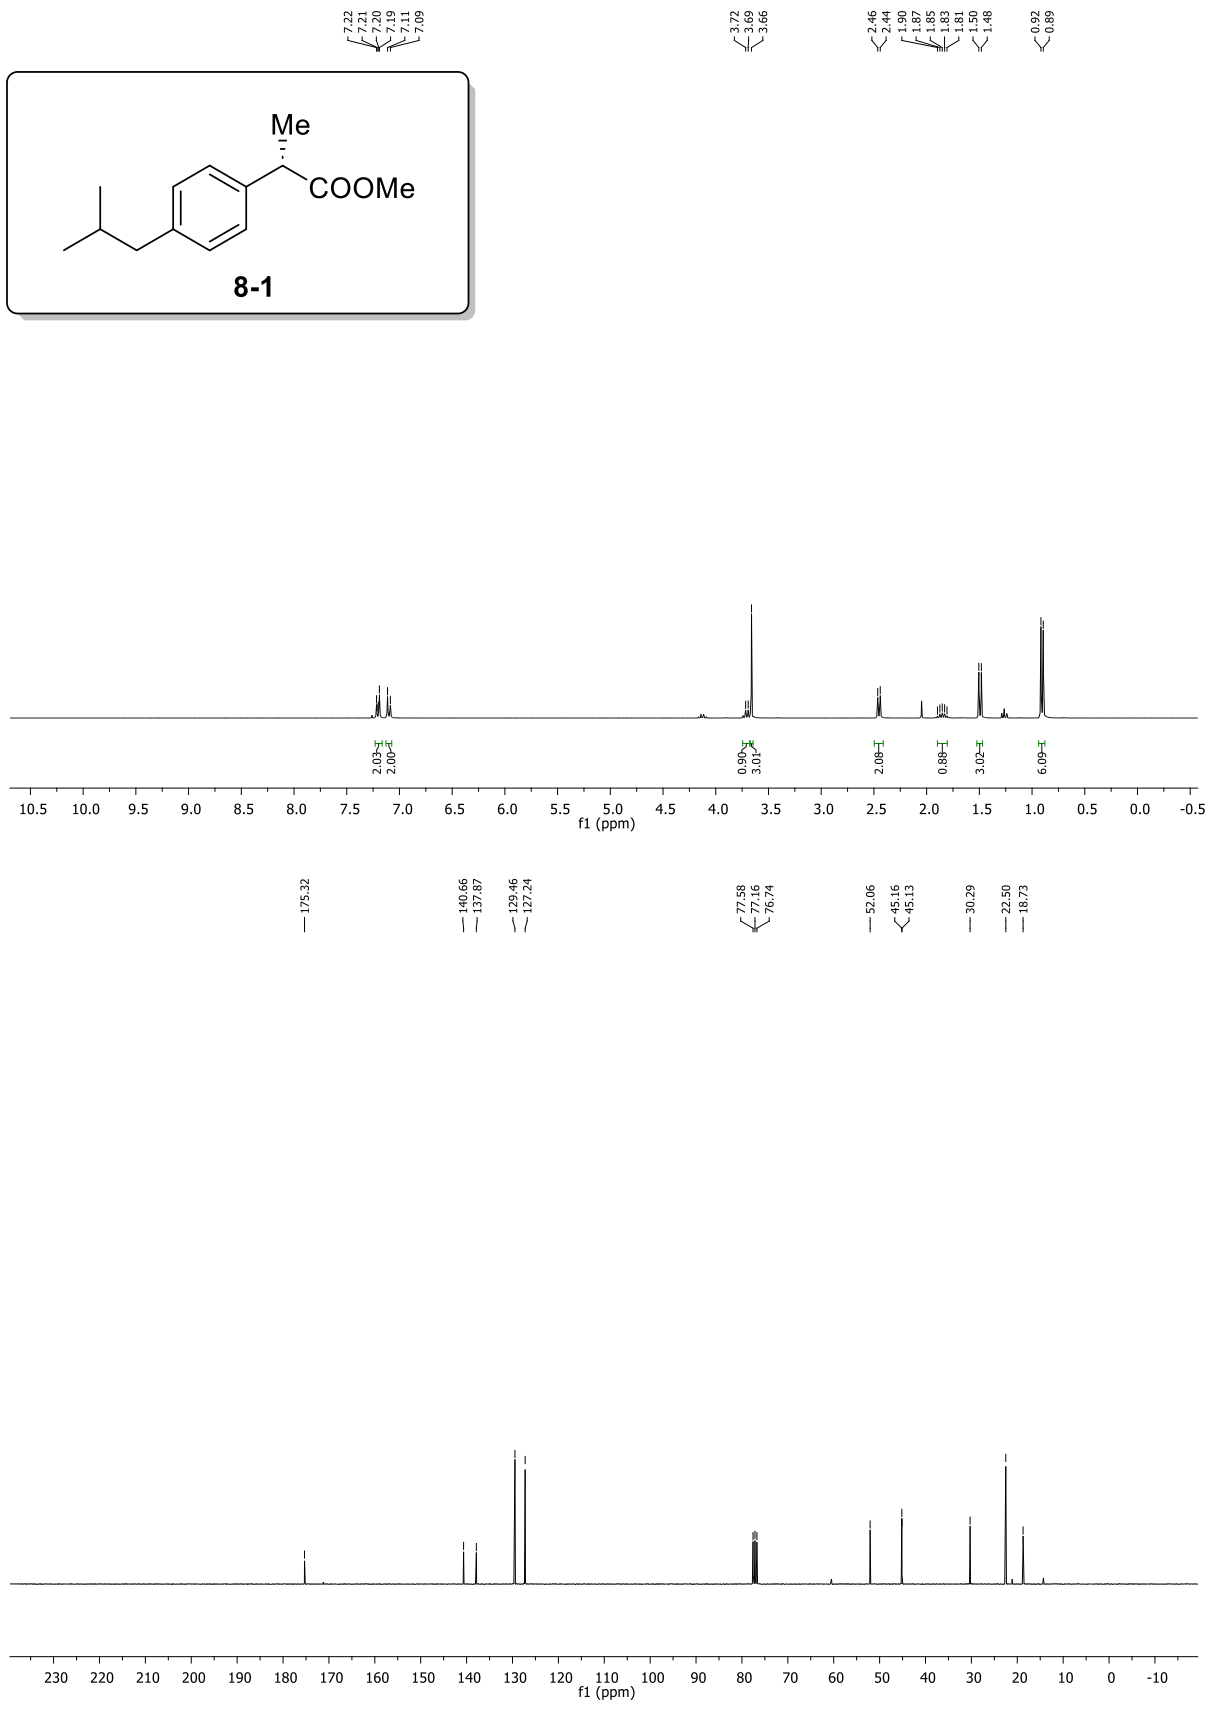

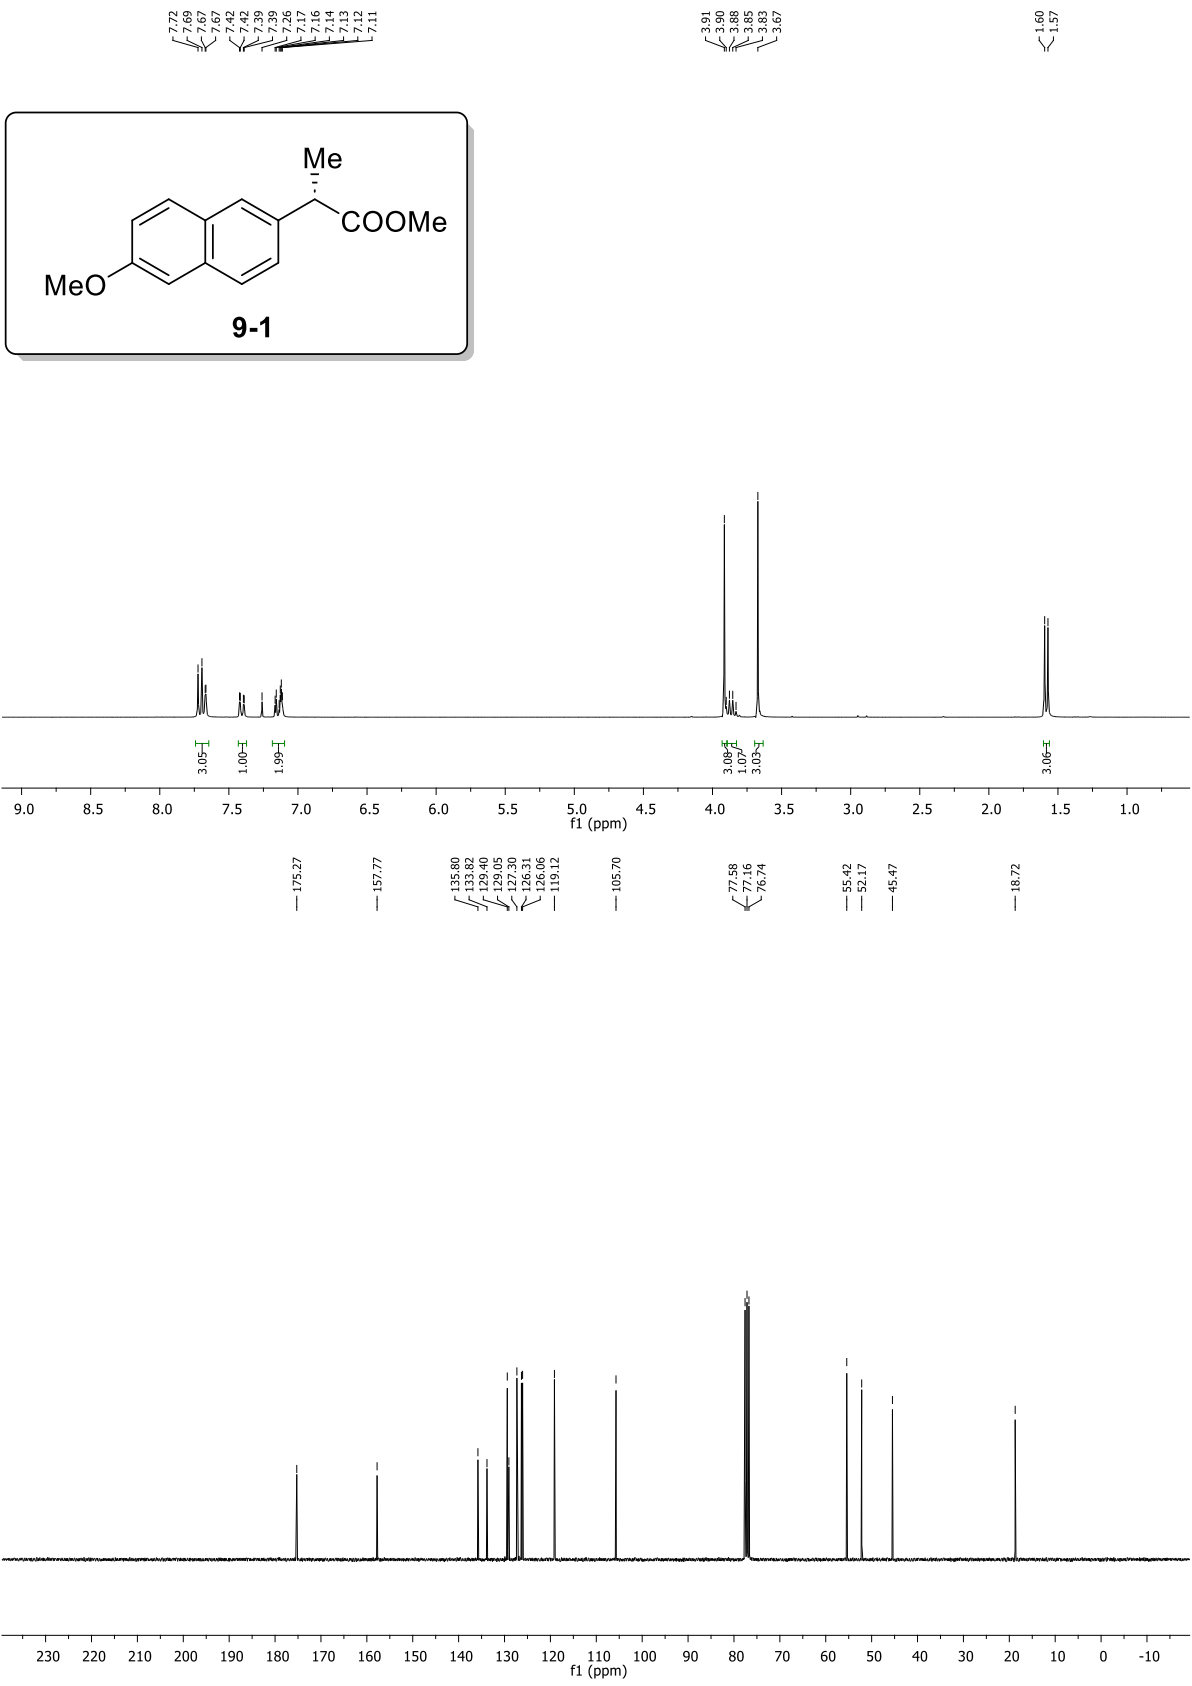

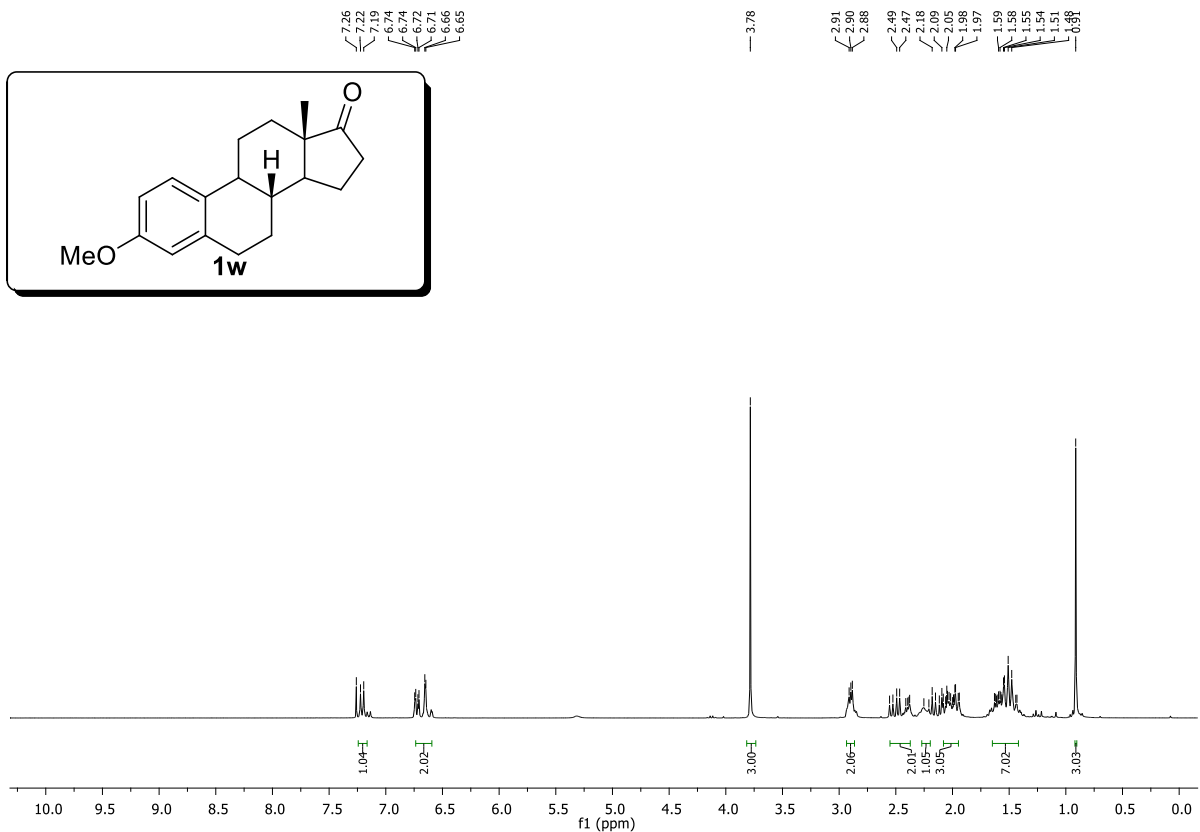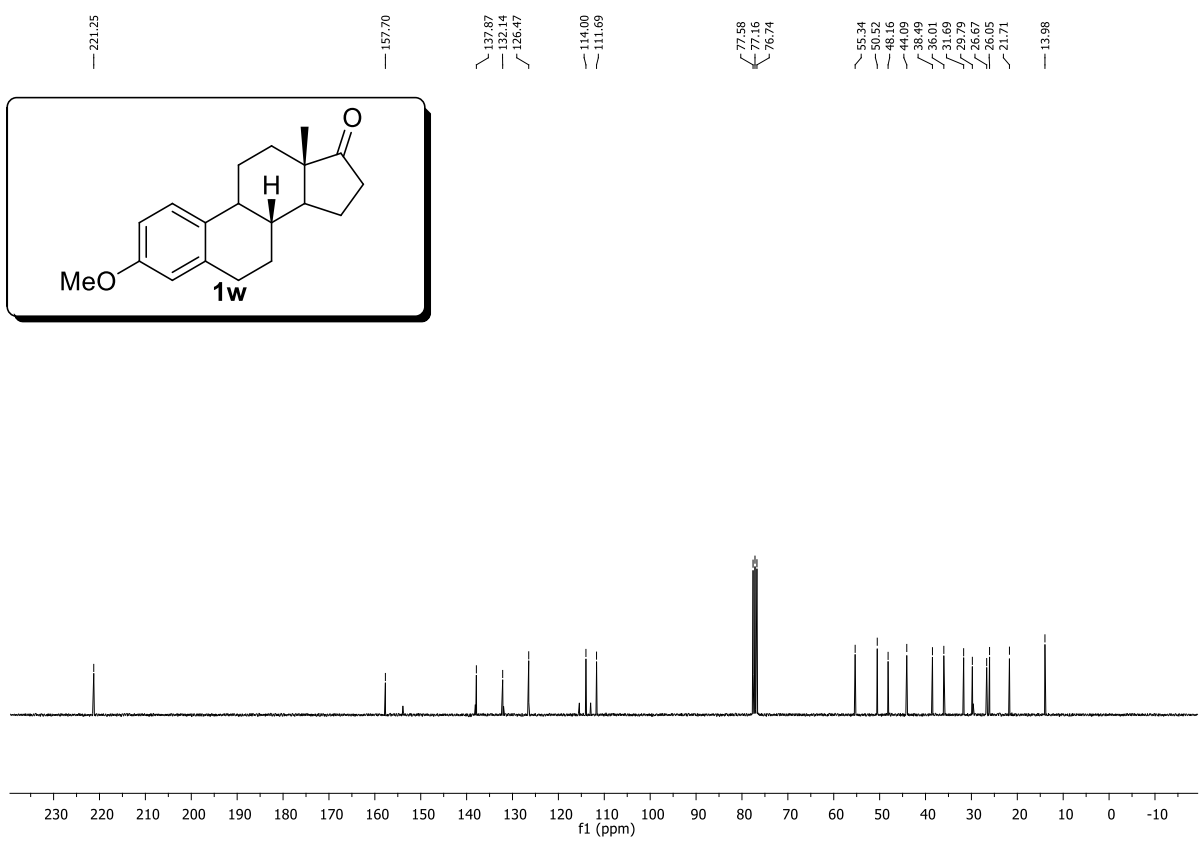

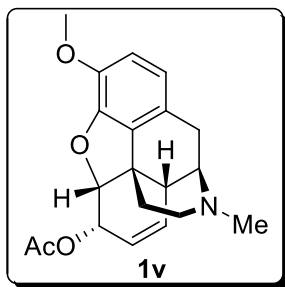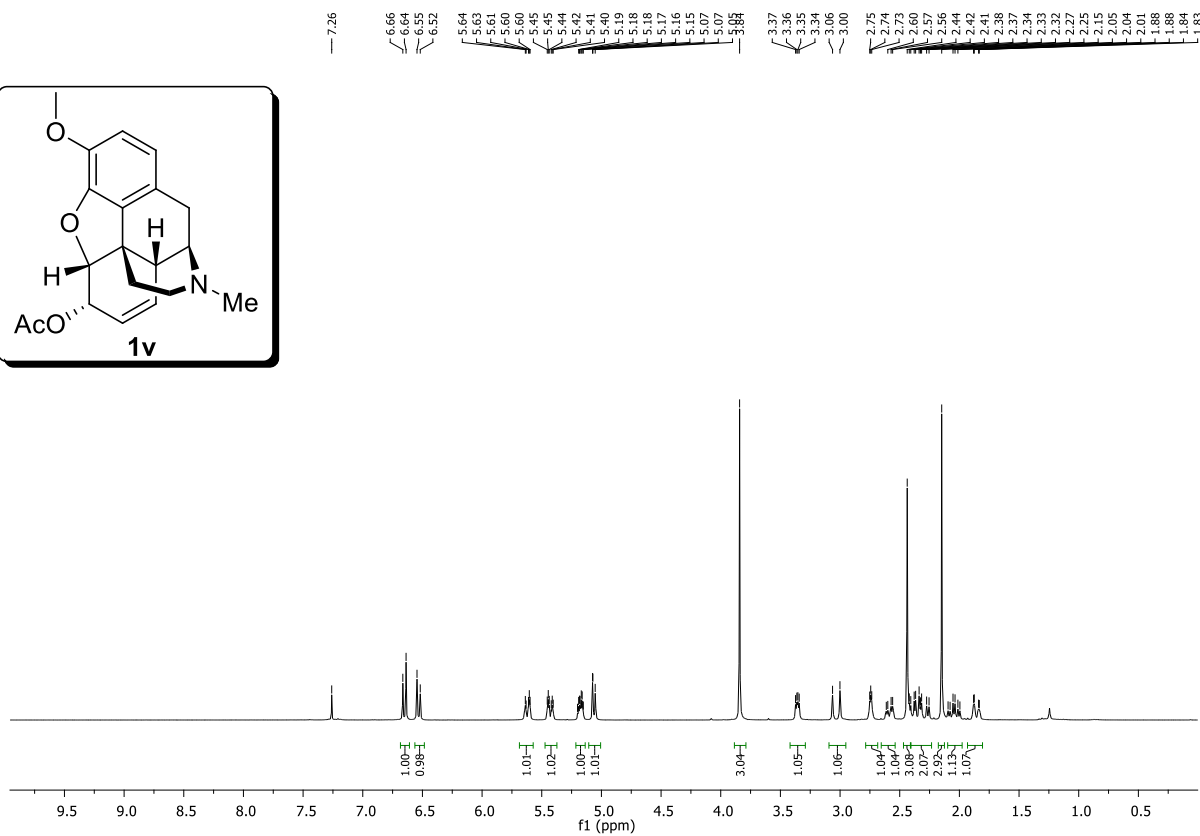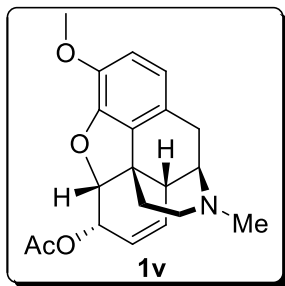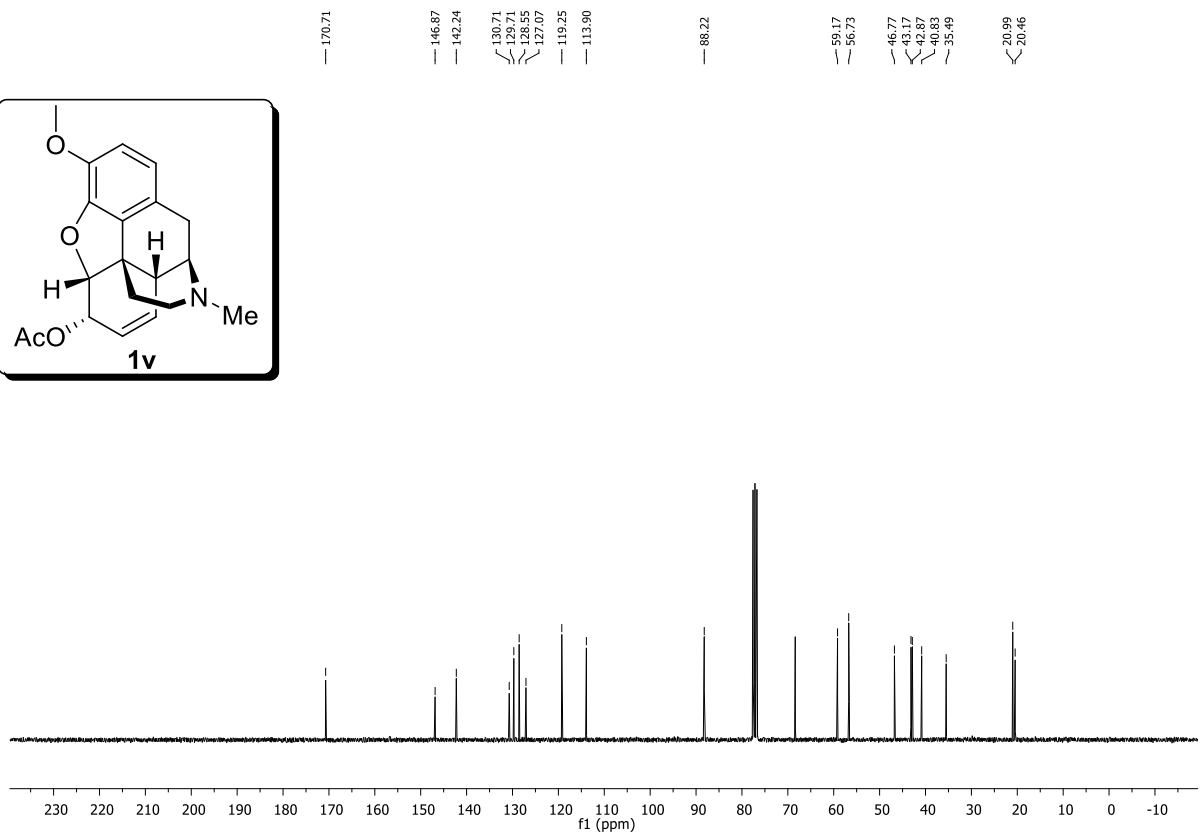

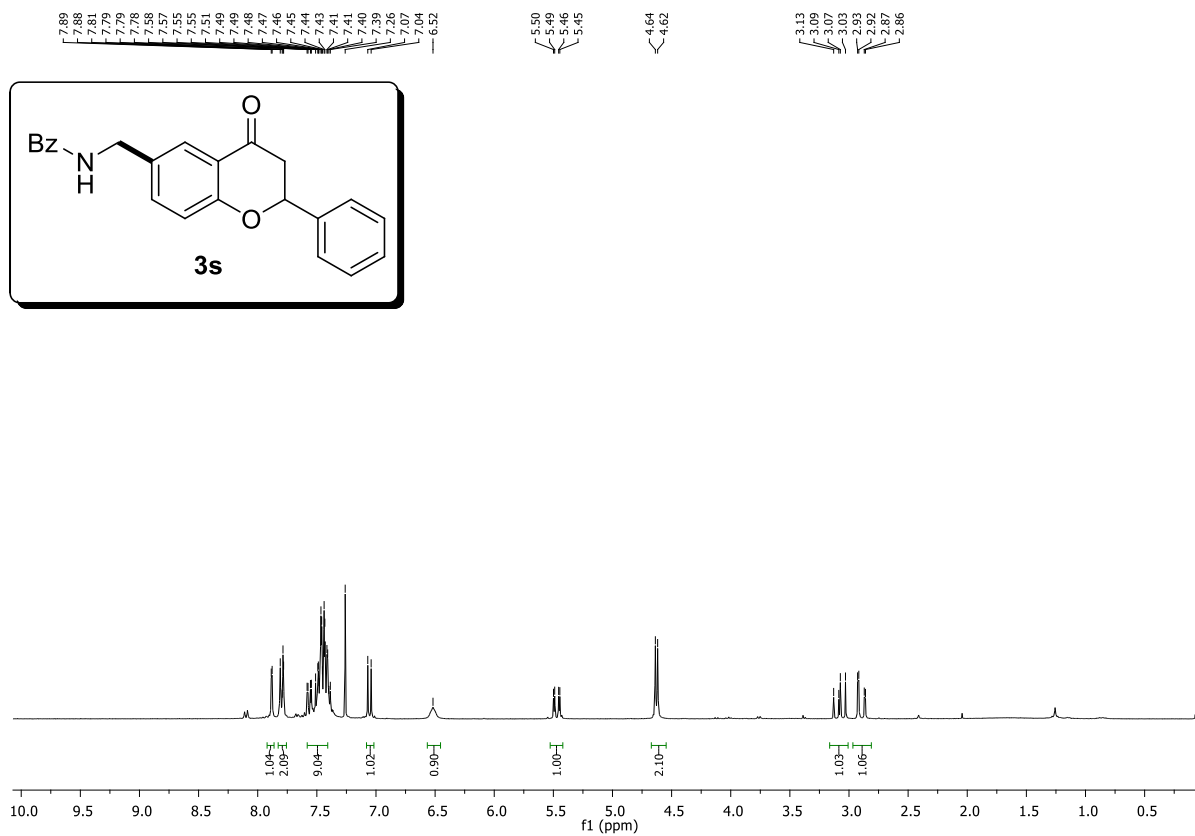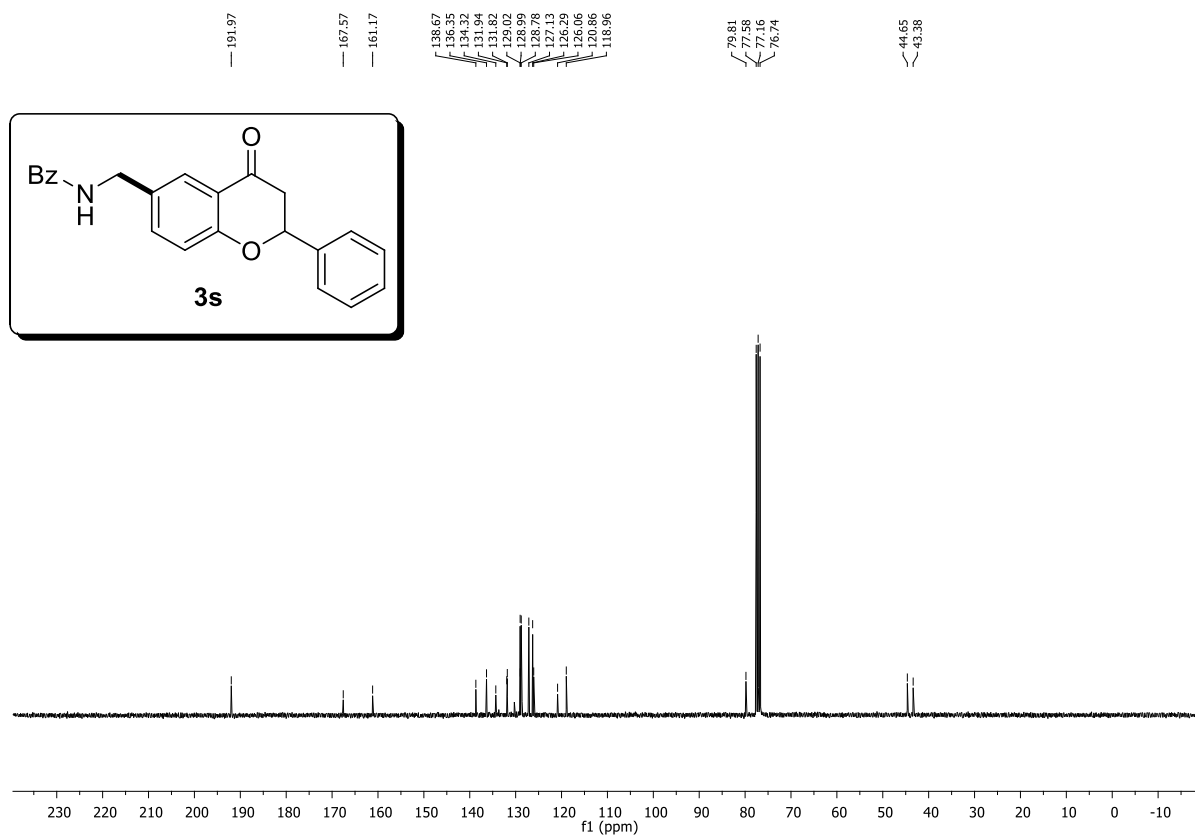



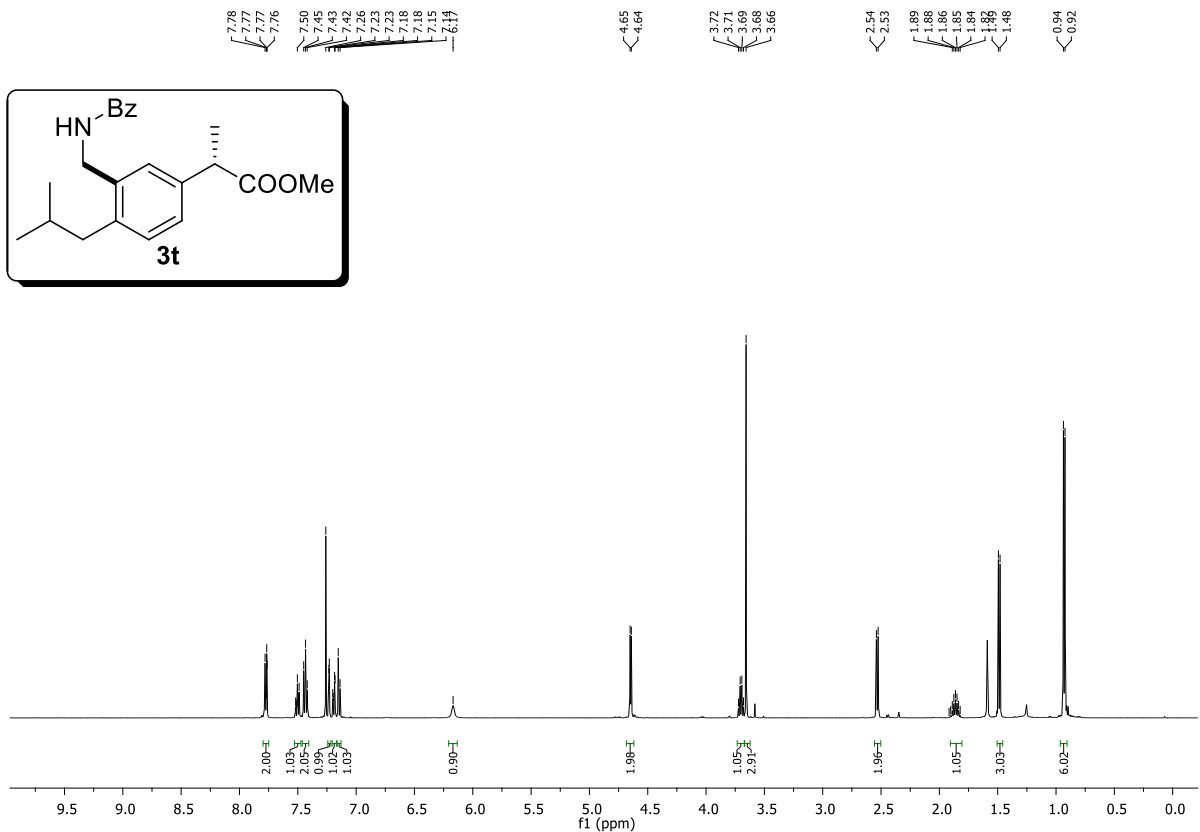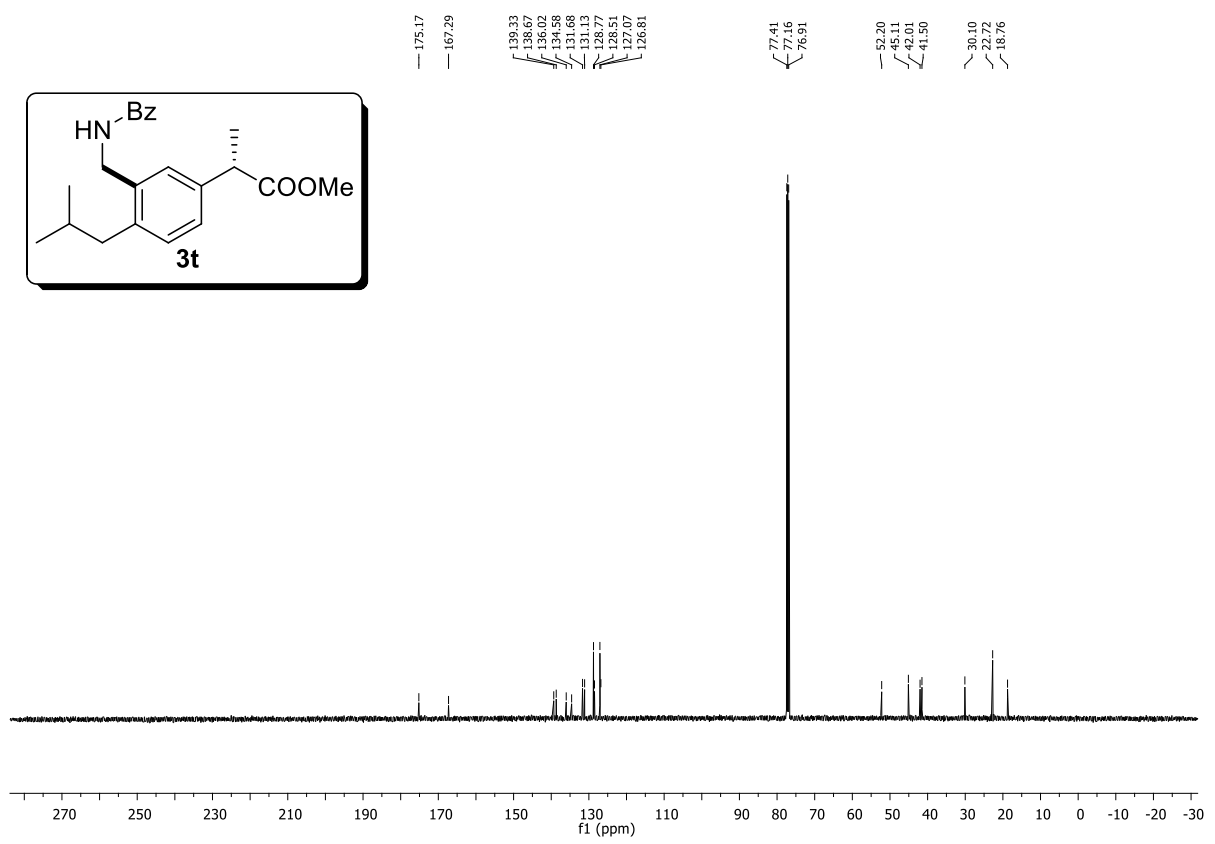

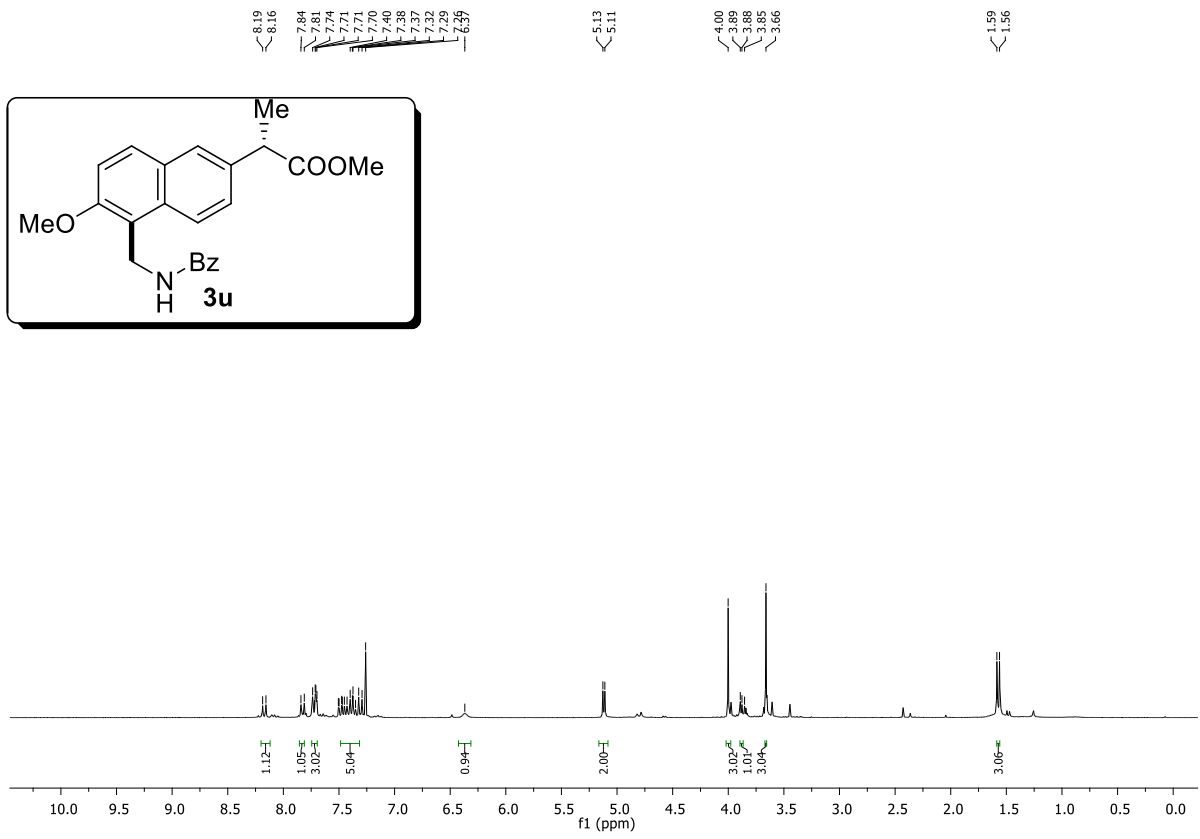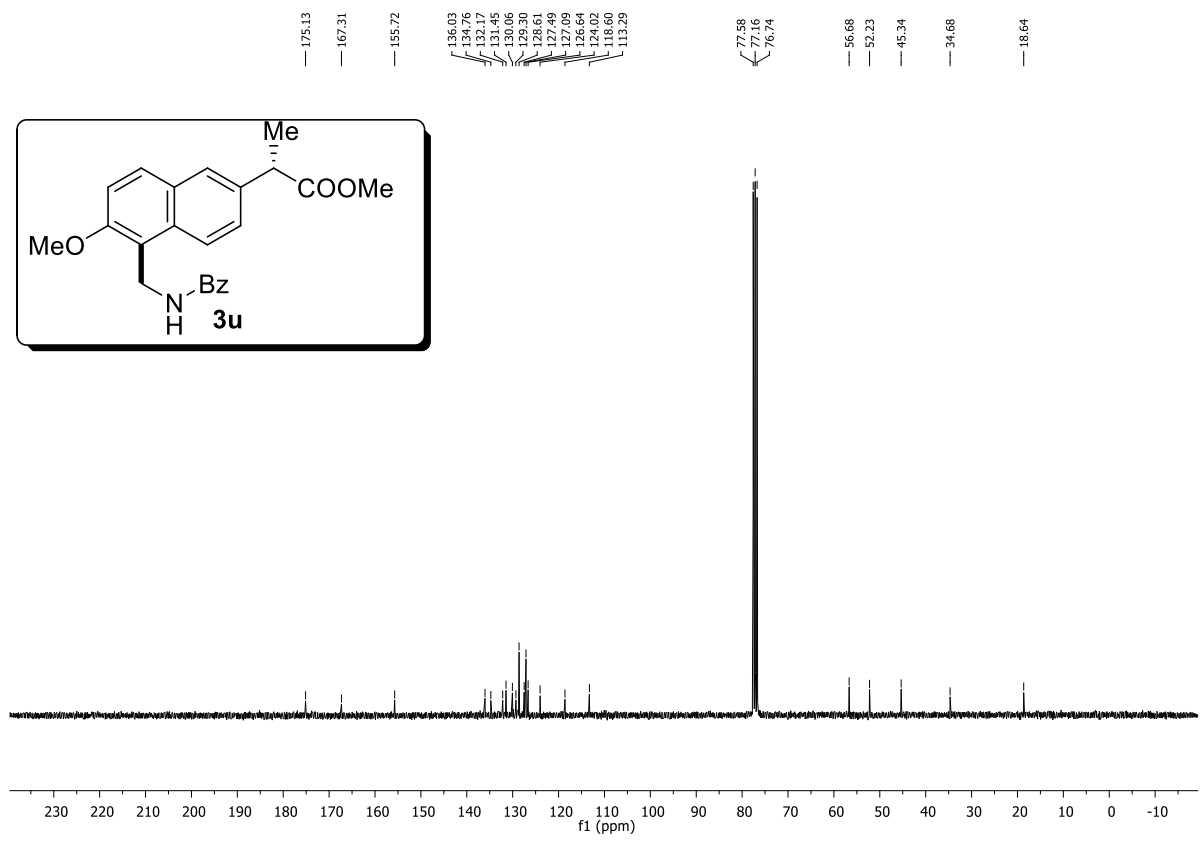

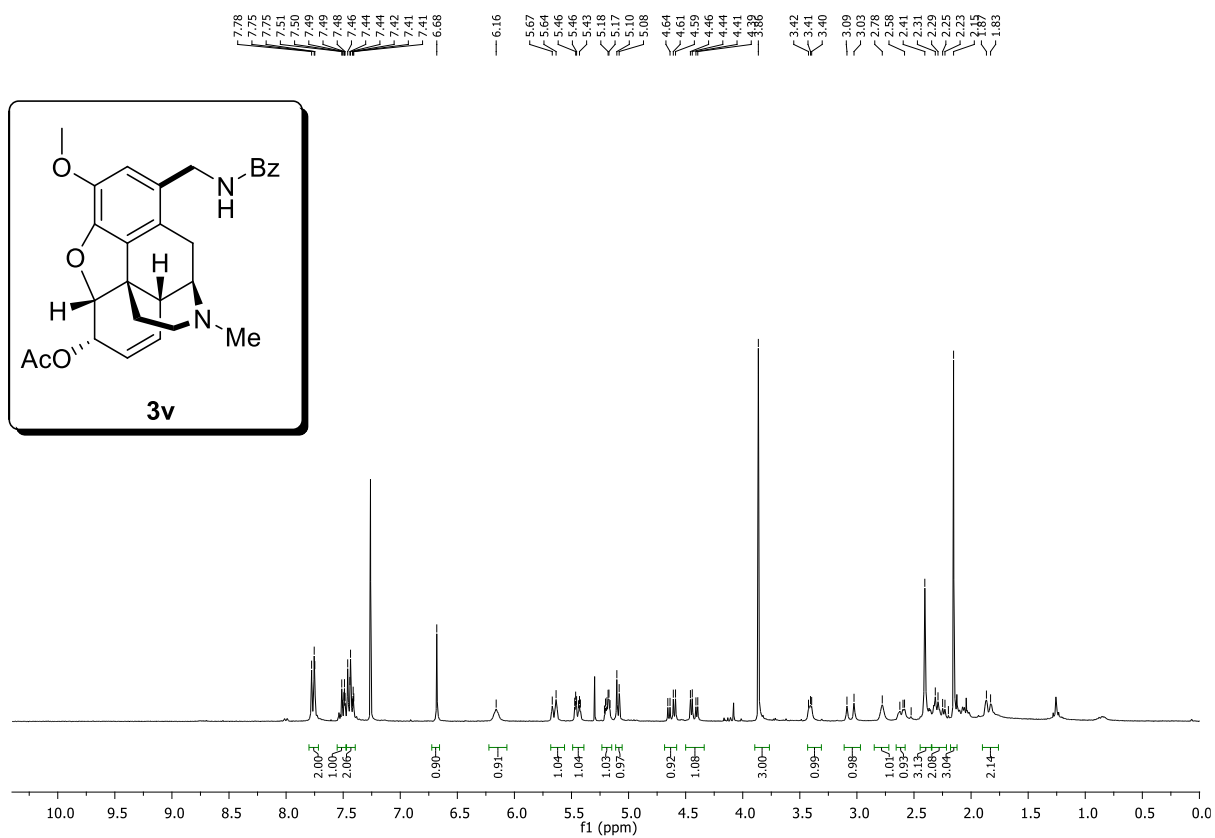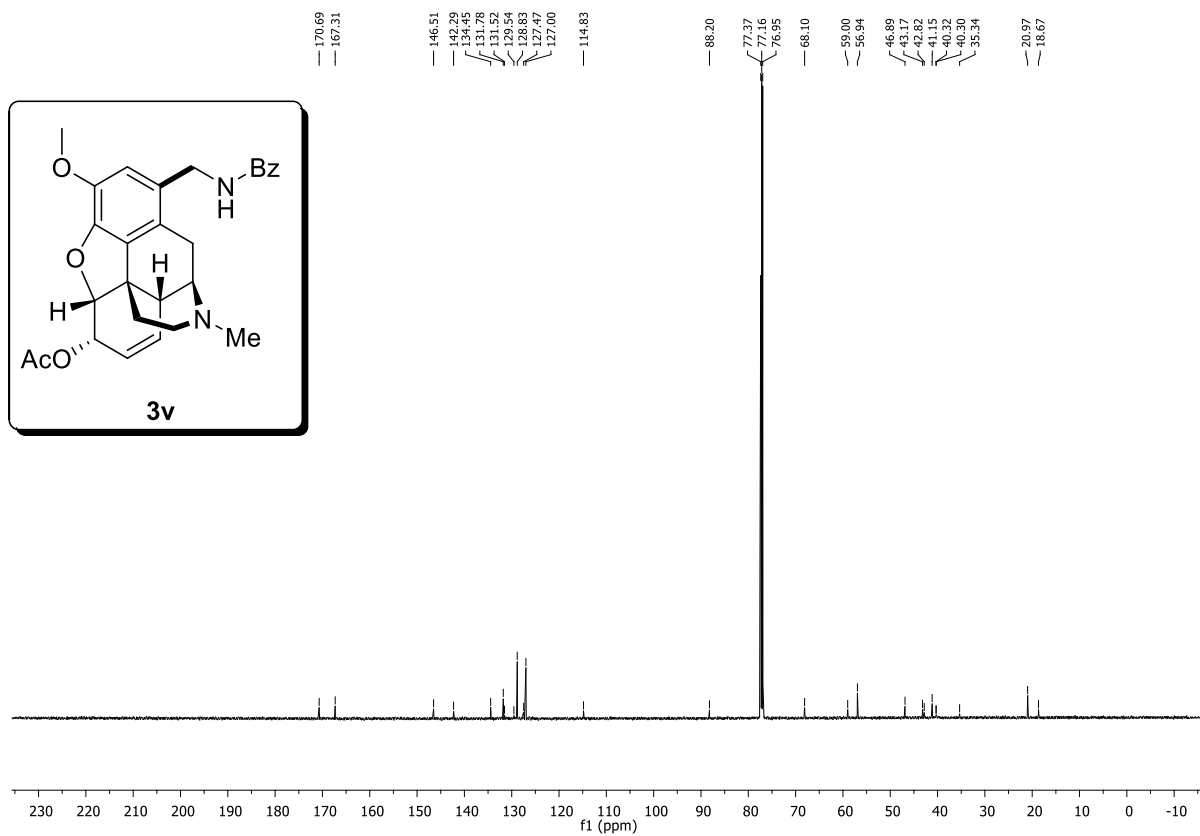

7.77, 7.76, 7.75, 7.74, 7.73, 7.50, 7.49, 7.48, 7.47, 7.46, 7.45, 7.44, 7.43, 7.42, 7.41, 7.40, 7.38, 7.37, 7.28, 7.16, 6.86, 6.78, 6.67, 6.64, 6.73, 4.71, 4.70, 4.61, 4.59, 4.59, 3.88, 3.86, 2.92, 2.90, 2.89, 2.54, 2.48, 2.46, 2.44, 2.43, 2.41, 2.41, 2.27, 2.20, 2.20, 2.14, 2.14, 2.10, 2.08, 2.07, 2.05, 2.04, 2.03, 2.02, 2.00, 1.99, 1.97, 1.94, 1.93, 1.62, 1.60, 1.58, 1.56, 1.55, 1.53, 1.50, 1.47, 1.46, 1.43, 1.42, 1.41, 0.80, 0.89

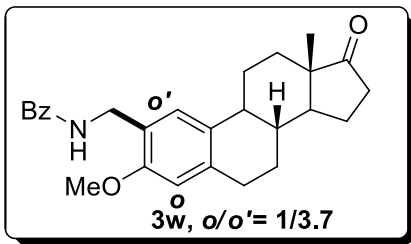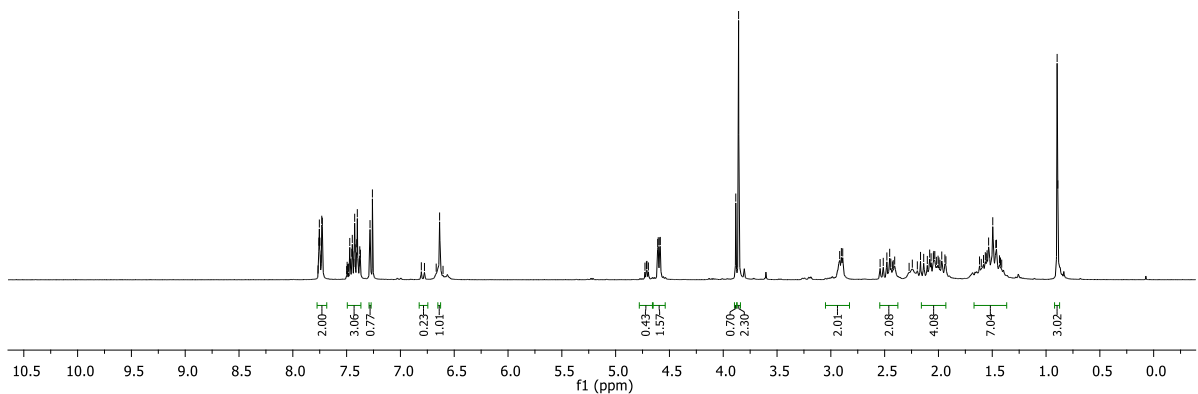

220.90, 167.12, 156.52, 155.91, 136.92, 136.05, 135.05, 134.88, 132.09, 131.40, 131.37, 128.60, 127.64, 127.04, 125.78, 124.38, 123.80, 111.02, 108.22, 77.58, 77.16, 76.74, 55.75, 55.61, 50.55, 50.48, 48.13, 47.04, 44.04, 40.31, 38.51, 37.64, 35.98, 31.68, 29.87, 28.72, 26.65, 26.09, 21.98, 13.92

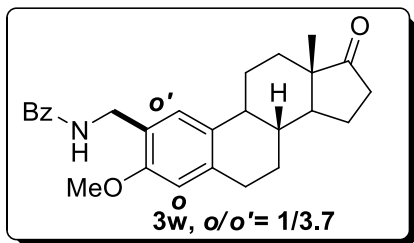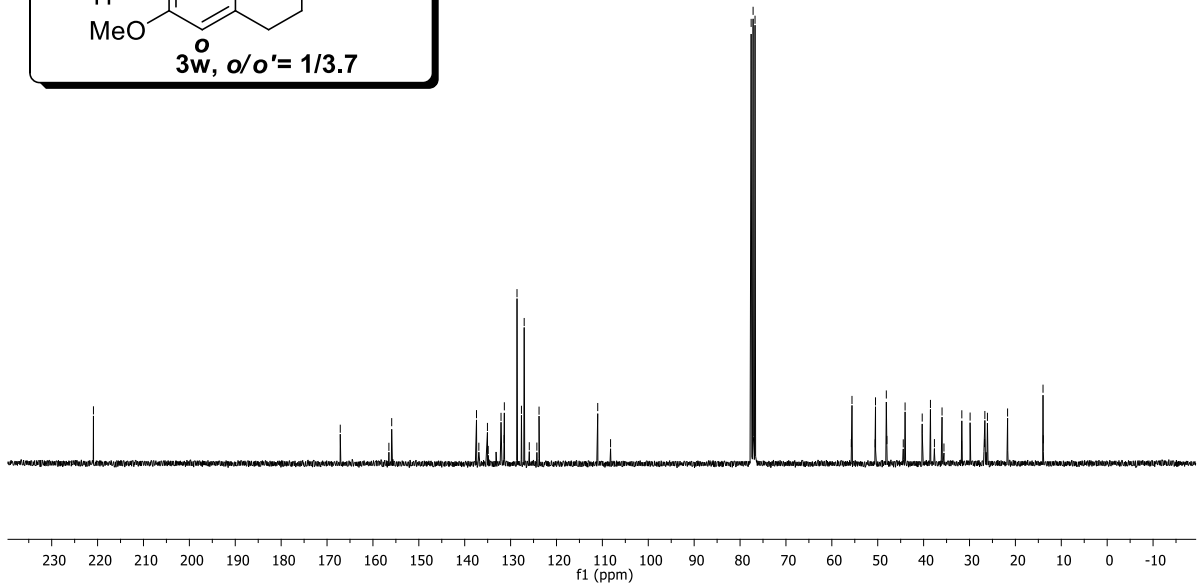

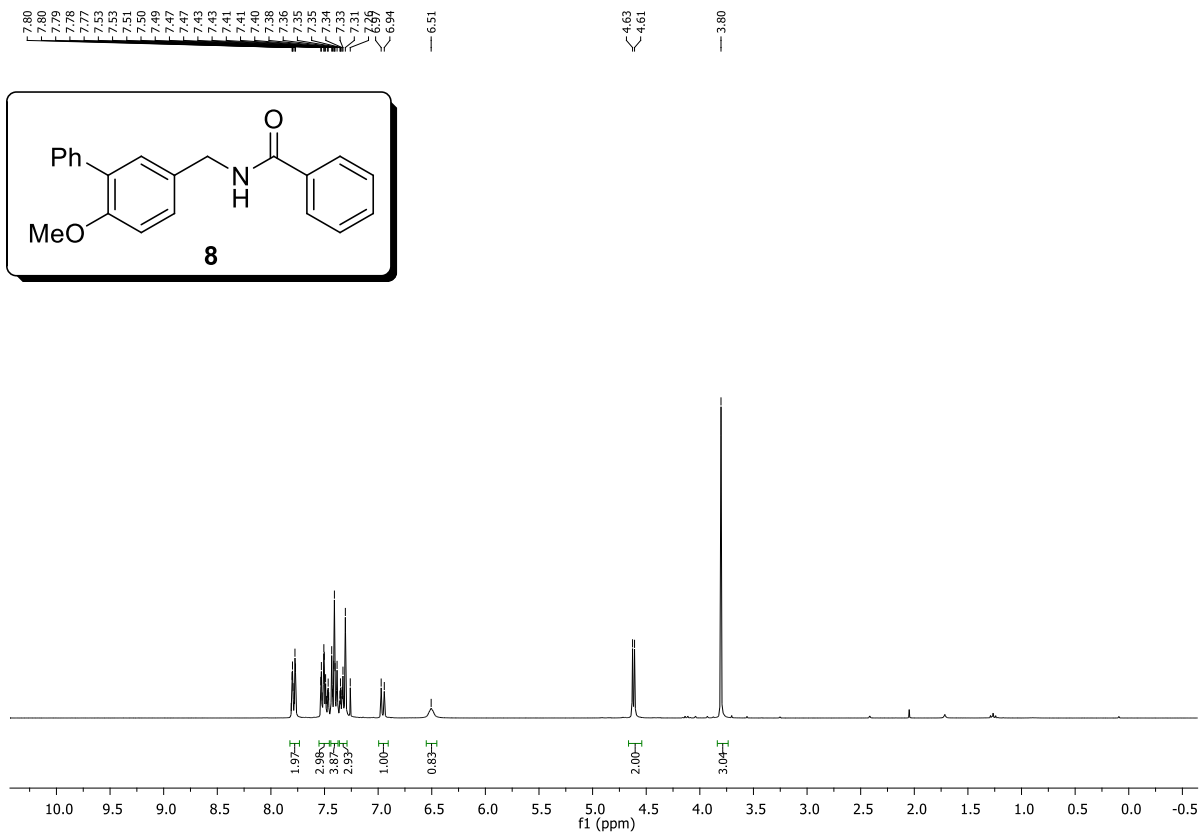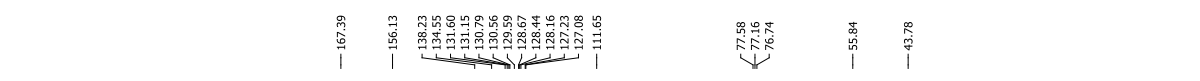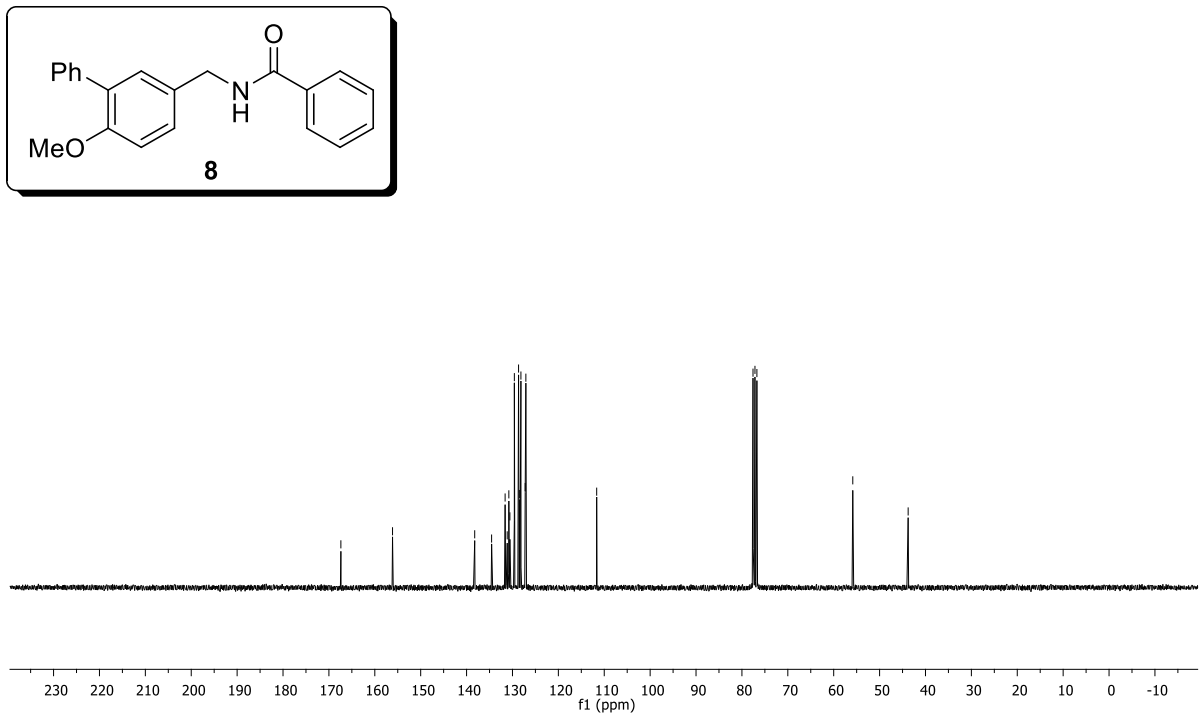

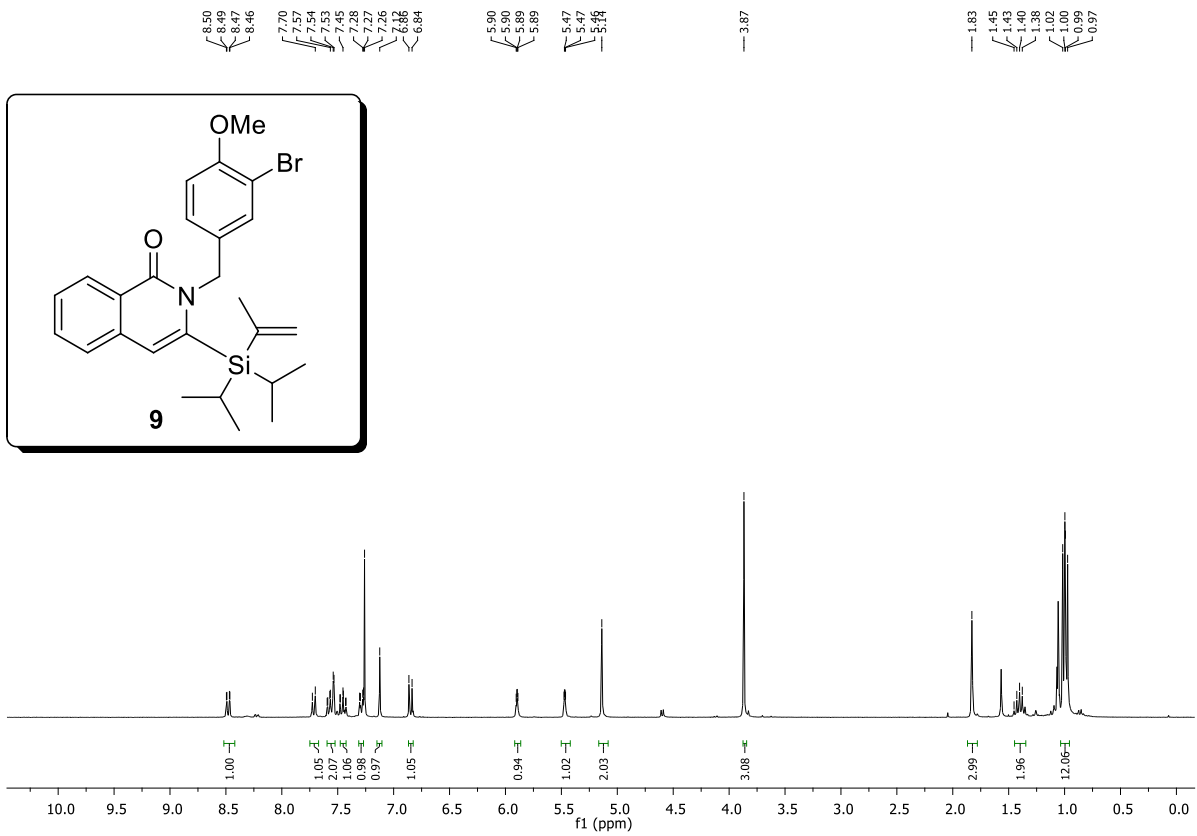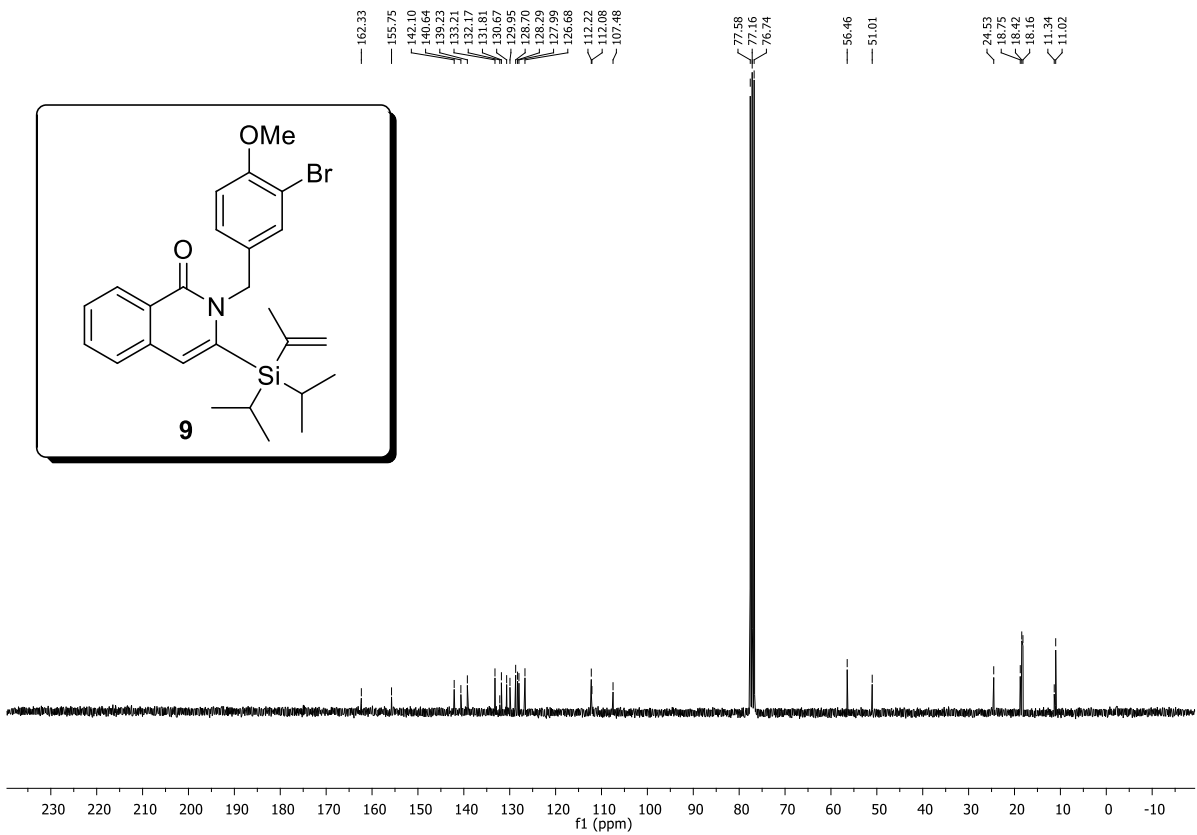

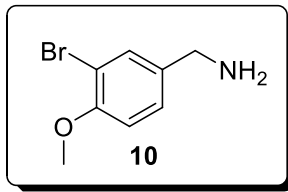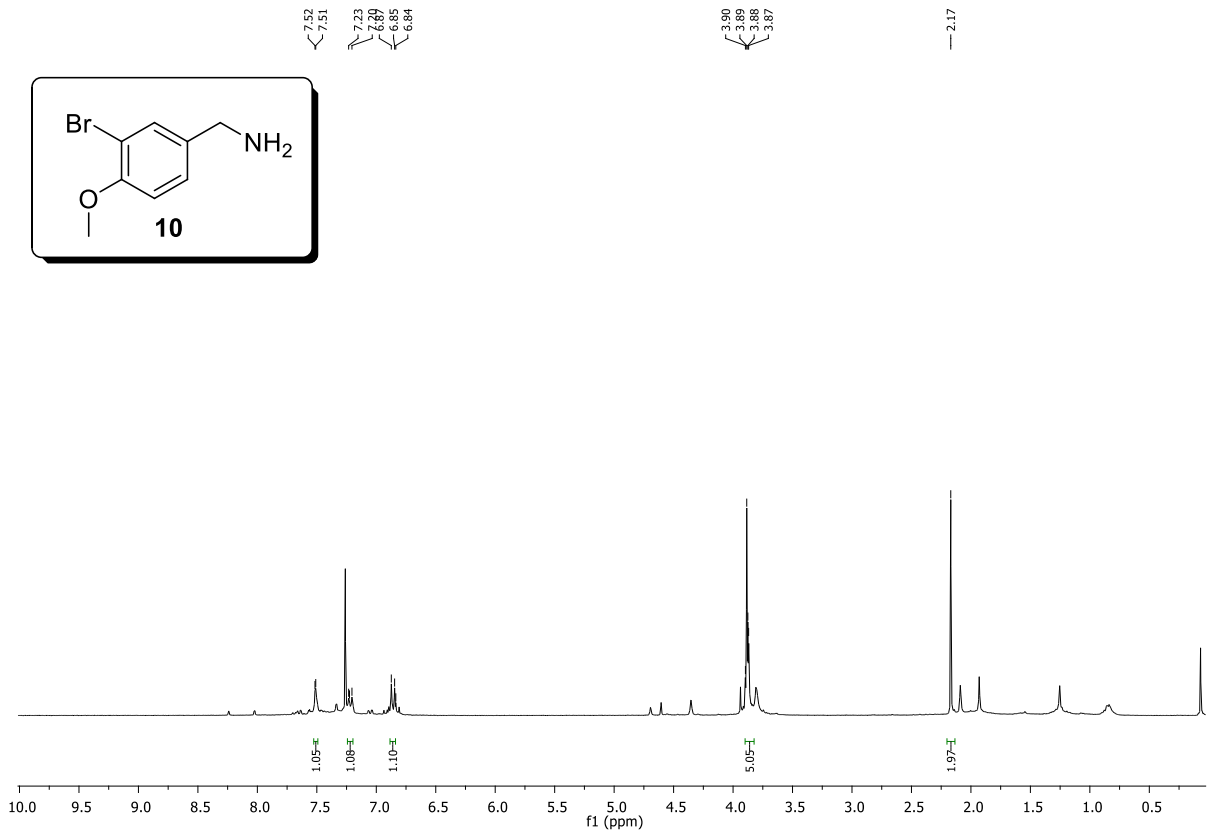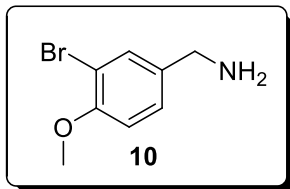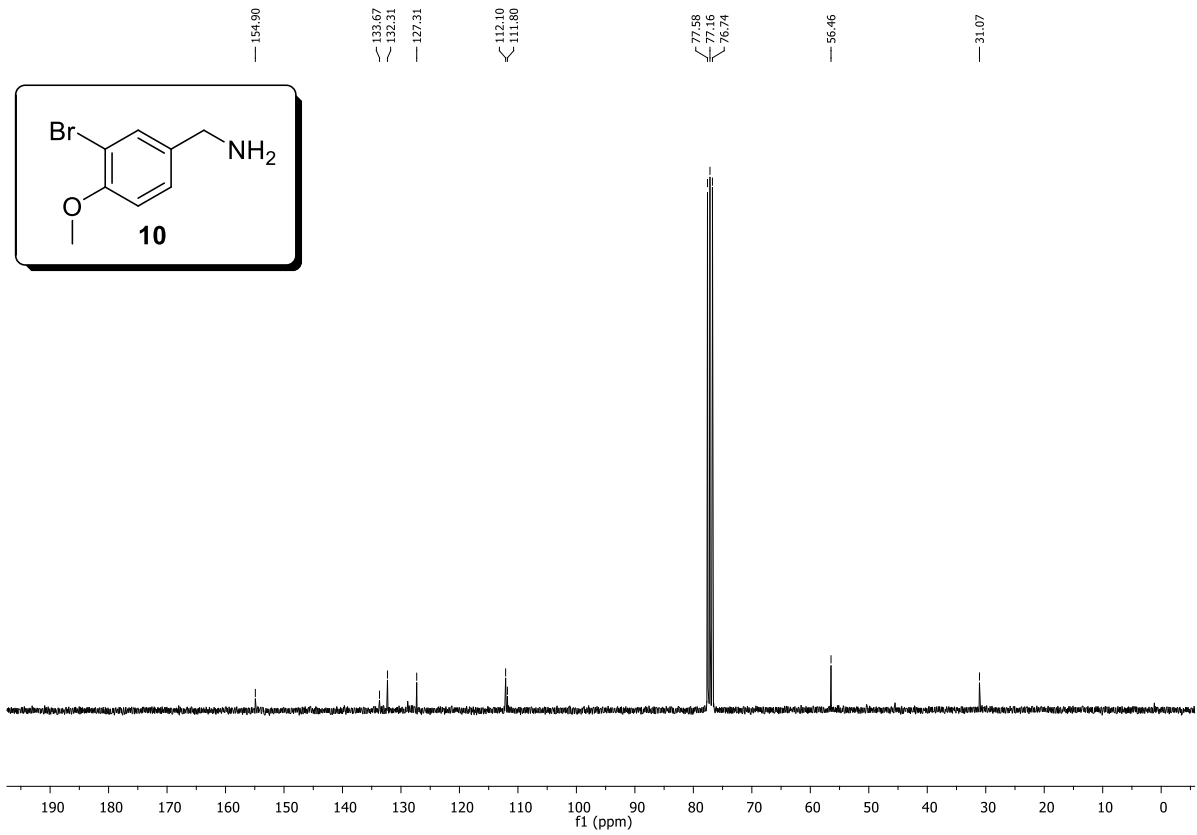

## 6. Chiral HPLC spectrums

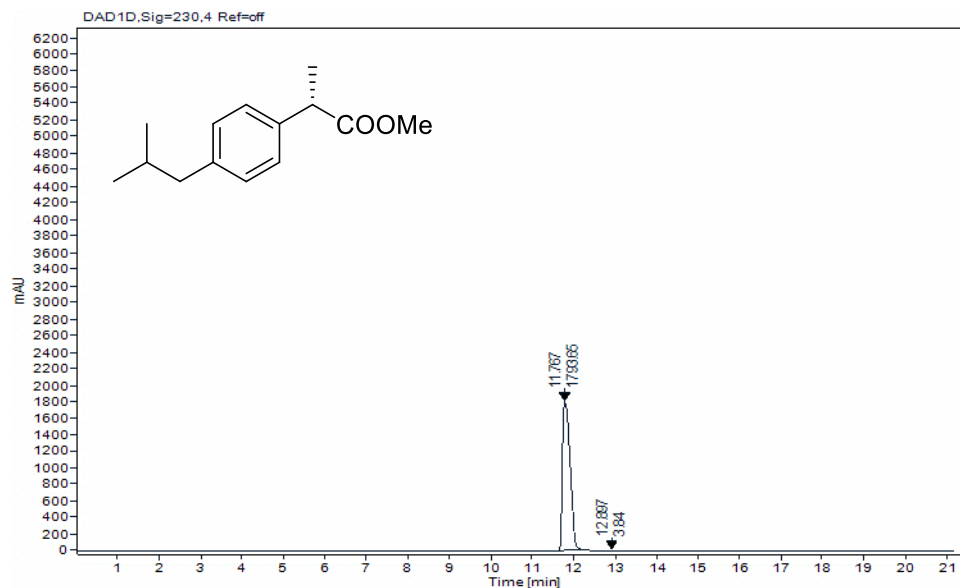

| Signal:  |             | DAD1D,Sig=230,4 Ref=off |           |         |
|----------|-------------|-------------------------|-----------|---------|
| RT [min] | Width [min] | Area                    | Height    | Area%   |
| 11.767   | 0.7741      | 23074.7633              | 1793.6464 | 99.0574 |
| 12.897   | 1.5201      | 219.5656                | 3.8351    | 0.9426  |

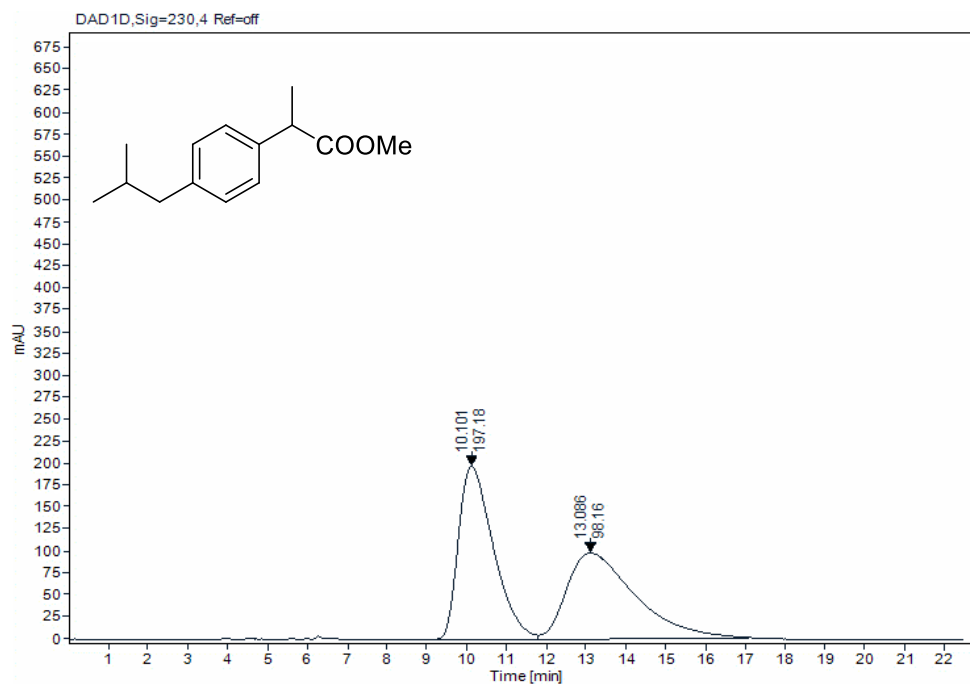

| Signal:  |             | DAD1D,Sig=230,4 Ref=off |          |         |
|----------|-------------|-------------------------|----------|---------|
| RT [min] | Width [min] | Area                    | Height   | Area%   |
| 10.101   | 2.5932      | 12073.261               | 197.1753 | 50.5183 |
| 13.086   | 5.2813      | 11825.51                | 98.1568  | 49.4817 |



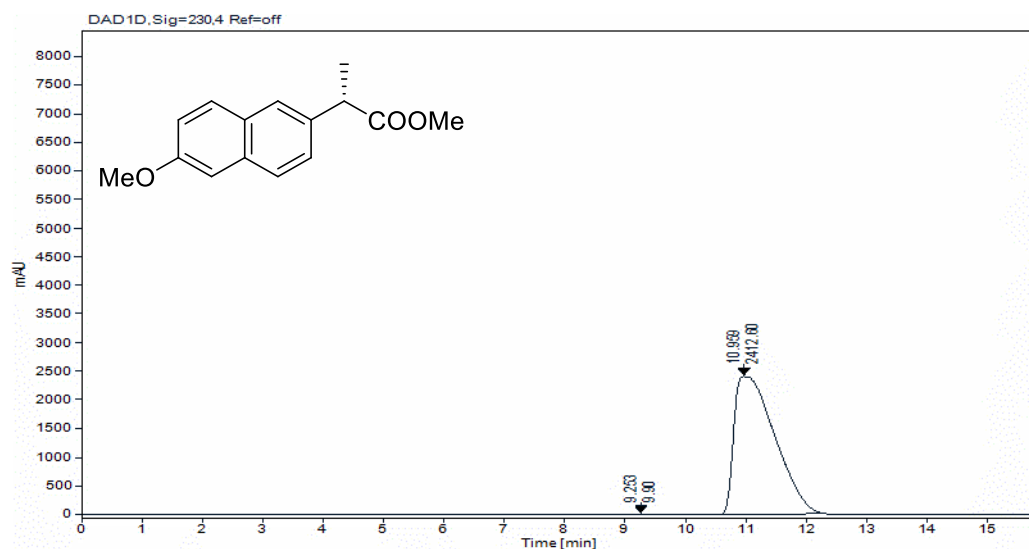

| Signal:  |             | DAD1D,Sig=230,4 Ref=off |        |         |
|----------|-------------|-------------------------|--------|---------|
| RT [min] | Width [min] | Area                    | Height | Area%   |
| 9.253    | 1.3013      | 295.3429                | 9.9007 | 0.2605  |
| 10.959   | 1.8564      | 113080.17               | 2412.6 | 99.7395 |

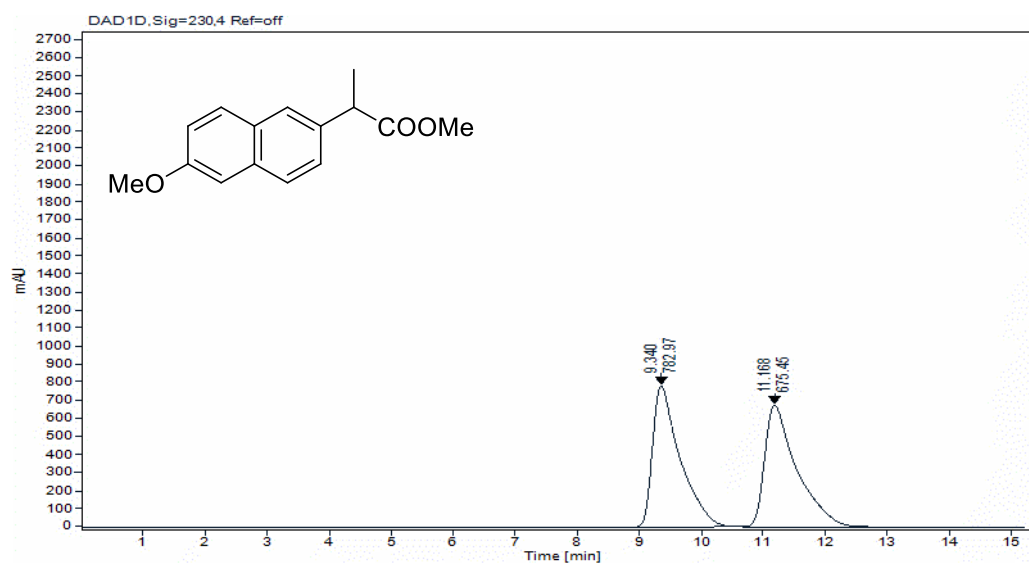

| Signal:  |             | DAD1D,Sig=230,4 Ref=off |          |         |
|----------|-------------|-------------------------|----------|---------|
| RT [min] | Width [min] | Area                    | Height   | Area%   |
| 9.34     | 1.7975      | 24050.205               | 782.9663 | 49.9862 |
| 11.168   | 2.0745      | 24063.476               | 675.4506 | 50.0138 |

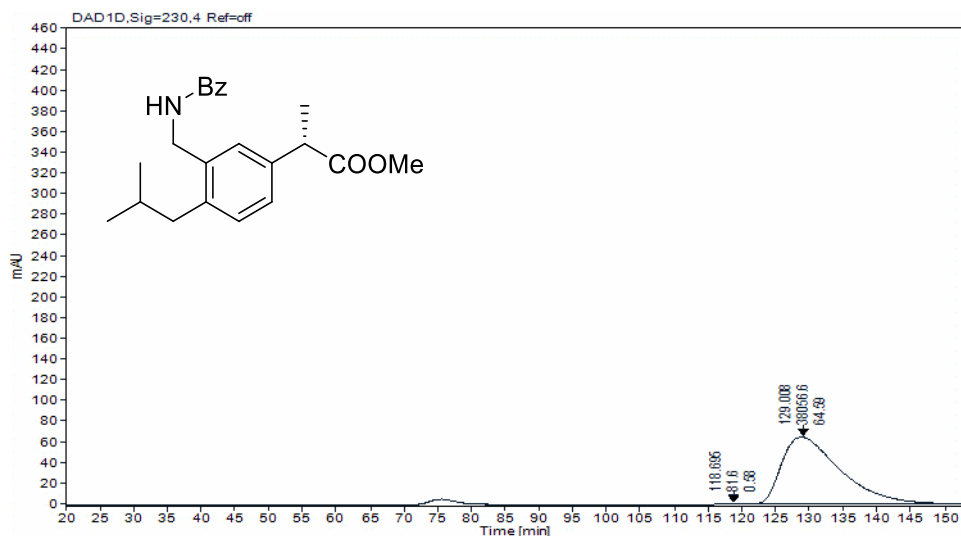

| Signal:  |             | DAD1D,Sig=230,4 Ref=off |        |        |
|----------|-------------|-------------------------|--------|--------|
| RT [min] | Width [min] | Area                    | Height | Area%  |
| 118.695  | 5.45        | 81.6034                 | 0.5777 | 0.214  |
| 129.008  | 26.3828     | 38056.584               | 64.592 | 99.786 |

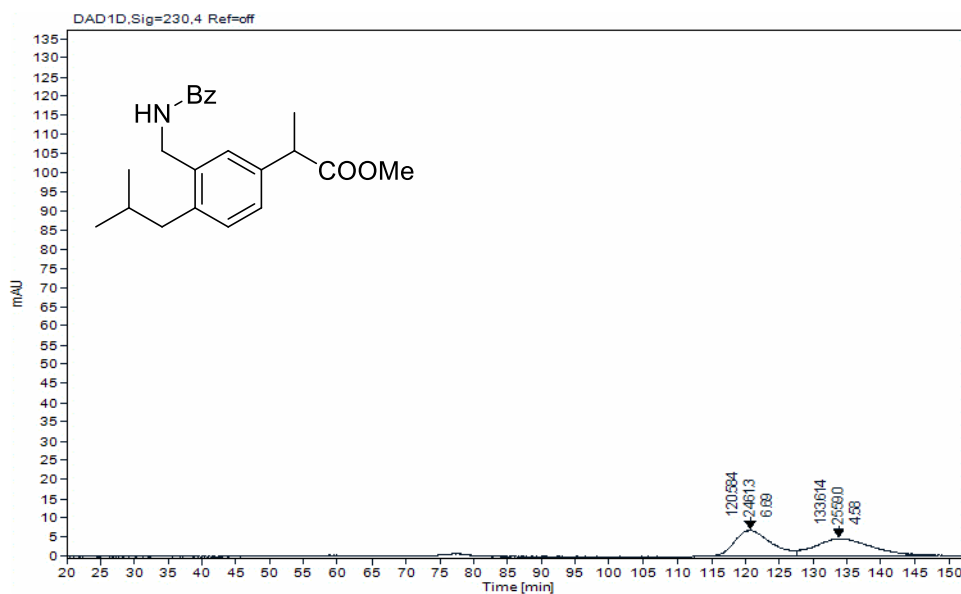

| Signal:  |             | DAD1D,Sig=230,4 Ref=off |        |         |
|----------|-------------|-------------------------|--------|---------|
| RT [min] | Width [min] | Area                    | Height | Area%   |
| 120.584  | 12.2272     | 2461.296                | 6.6928 | 49.0267 |
| 133.614  | 19.9129     | 2559.0206               | 4.5816 | 50.9733 |

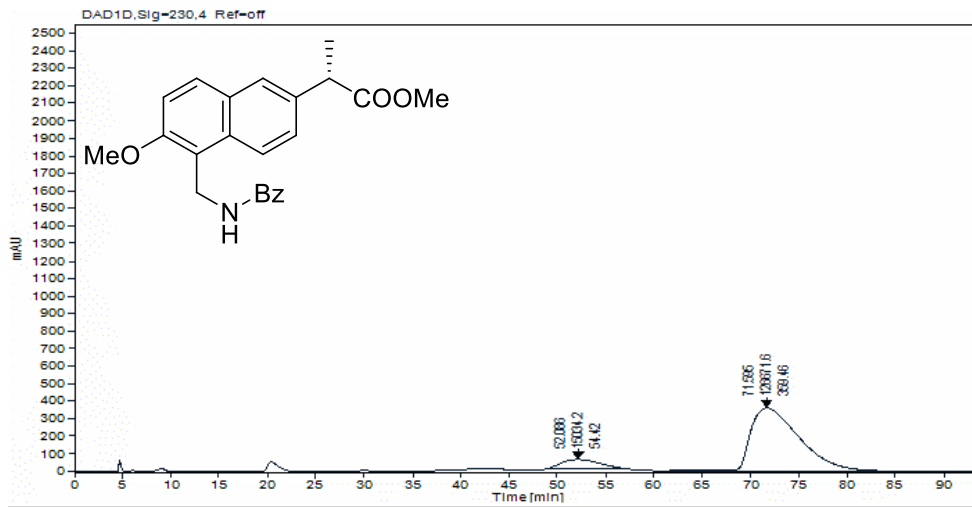

| Signal:  |             | DAD1D,Sig=230,4 Ref=off |          |         |
|----------|-------------|-------------------------|----------|---------|
| RT [min] | Width [min] | Area                    | Height   | Area%   |
| 52.086   | 8.4119      | 15034.171               | 54.4174  | 10.6094 |
| 71.595   | 24.7219     | 126671.57               | 359.4567 | 89.3906 |

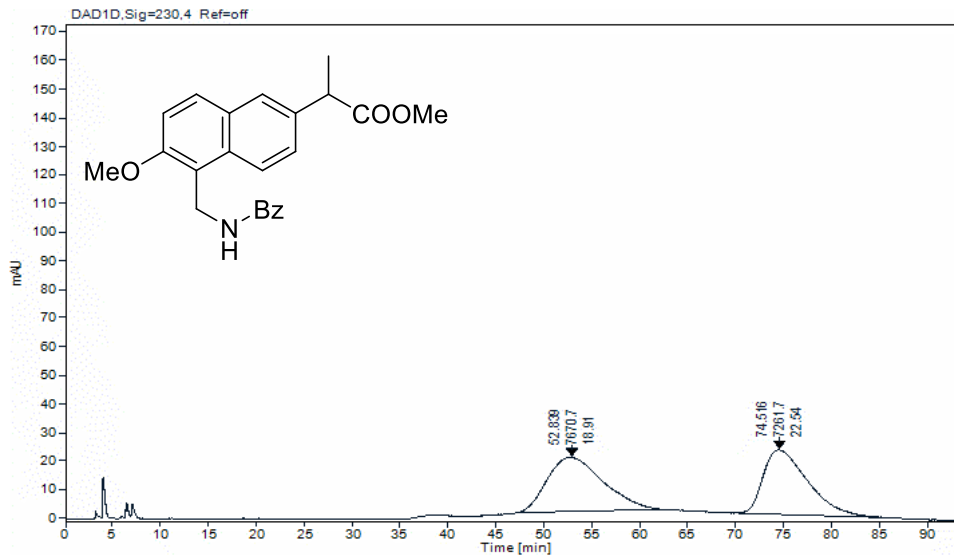

| Signal:  |             | DAD1D,Sig=230,4 Ref=off |         |         |
|----------|-------------|-------------------------|---------|---------|
| RT [min] | Width [min] | Area                    | Height  | Area%   |
| 52.839   | 15.2954     | 7670.7384               | 18.9102 | 51.3696 |
| 74.516   | 18.358      | 7261.6945               | 22.5386 | 48.6304 |

## 7. 2D- ( $^1\text{H}/^1\text{H}$ -, $^1\text{H}/^{13}\text{C}$ -) NMR Spectra

Li Guobao

LGB-13-85-HPLC

structure  
verification

Avance600

2022-08-16

### LGB-13-85 in $\text{CDCl}_3$

NMR Data were recorded at ambient temperature on a Bruker Avance III 600 spectrometer operating at 600.1 MHz for  $^1\text{H}$  and 125.8 MHz for  $^{13}\text{C}$ . Chemical shifts  $\delta$  are given in ppm relative to TMS. The solvent signals were used as reference ( $^1\text{H}$ :  $\delta_{\text{H}}$  7.260 ppm residual  $\text{CHCl}_3$ ,  $^{13}\text{C}$ :  $\delta_{\text{C}}$  77.16 ppm). Coupling constants were given in Hertz and determined assuming first-order spin-spin coupling.

red  $^{13}\text{C}$  chemical shift

blue  $^1\text{H}$  chemical shift

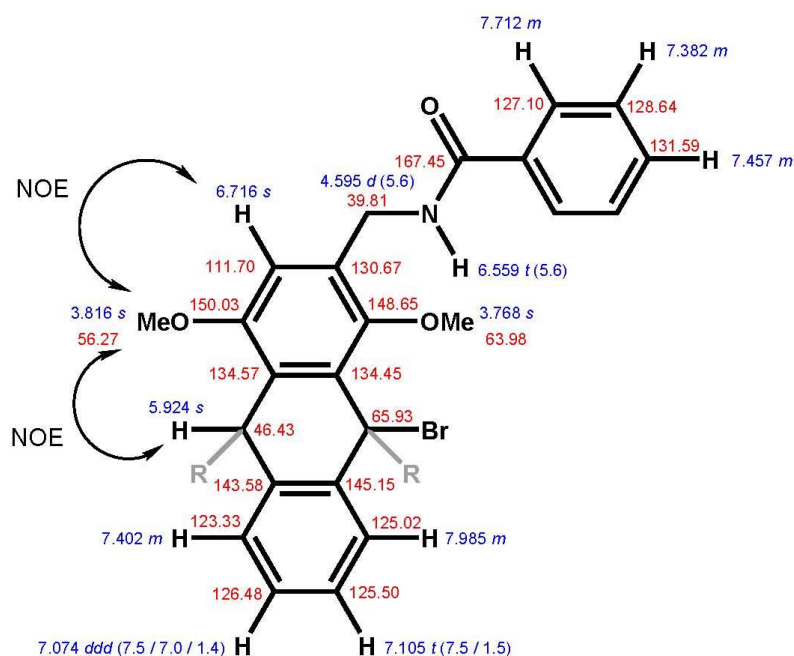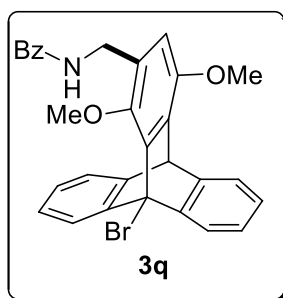



LGB-13-85-HPLC in CDCl3

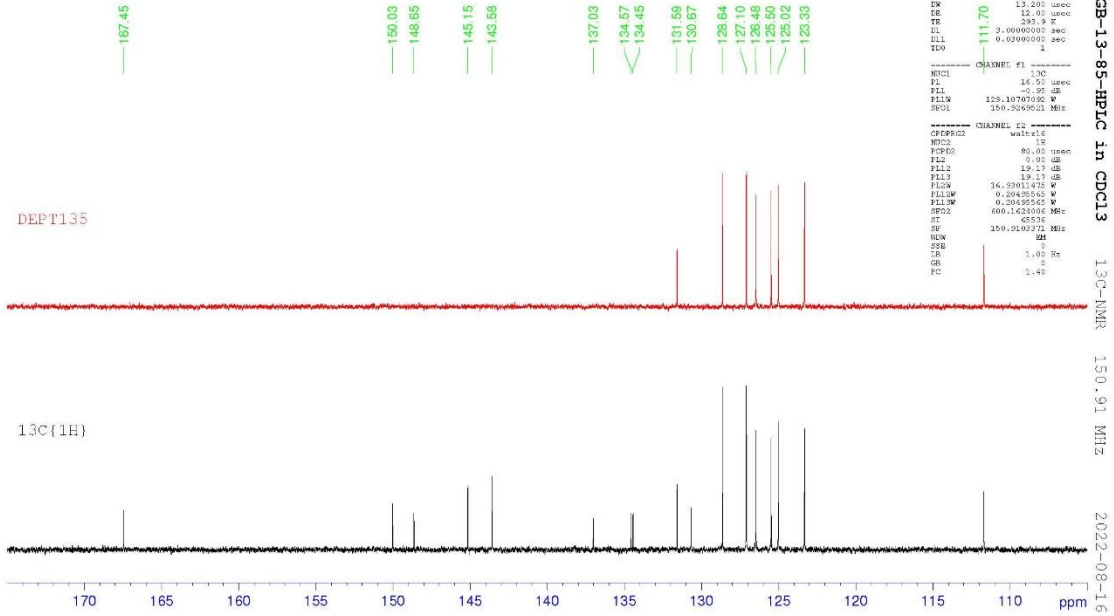

**I1 Guobao**  
**LGB-13-85-HPLC in CDCl3**  
**13C-NMR**  
**150.91 MHz**  
**2022-08-16**

```

NAME LGB-13-85-HPLC
EXPNO 11
PROCNO 1
Date_ 20220815
Time 3.05
INSTRUM spect
PROBHD 5 mm PABBI 1H/
PULPROG zgpg30
TD 65536
SOLVENT cdcl3
NS 8
DS 4
SWH 37078.789 Hz
FIDRES 0.377084 Hz
AQ 0.9465355 sec
RG 320
DE 13.200 usec
RE 14.00 usec
TE 300.2 K
F2 -0.00000000 sec
F3 0.00000000 sec
F4 0.00000000 sec
F5 0.00000000 sec
F6 0.00000000 sec
F7 0.00000000 sec
F8 0.00000000 sec
F9 0.00000000 sec
F10 0.00000000 sec
F11 0.00000000 sec
F12 0.00000000 sec
F13 0.00000000 sec
F14 0.00000000 sec
F15 0.00000000 sec
F16 0.00000000 sec
F17 0.00000000 sec
F18 0.00000000 sec
F19 0.00000000 sec
F20 0.00000000 sec
F21 0.00000000 sec
F22 0.00000000 sec
F23 0.00000000 sec
F24 0.00000000 sec
F25 0.00000000 sec
F26 0.00000000 sec
F27 0.00000000 sec
F28 0.00000000 sec
F29 0.00000000 sec
F30 0.00000000 sec
F31 0.00000000 sec
F32 0.00000000 sec
F33 0.00000000 sec
F34 0.00000000 sec
F35 0.00000000 sec
F36 0.00000000 sec
F37 0.00000000 sec
F38 0.00000000 sec
F39 0.00000000 sec
F40 0.00000000 sec
F41 0.00000000 sec
F42 0.00000000 sec
F43 0.00000000 sec
F44 0.00000000 sec
F45 0.00000000 sec
F46 0.00000000 sec
F47 0.00000000 sec
F48 0.00000000 sec
F49 0.00000000 sec
F50 0.00000000 sec
F51 0.00000000 sec
F52 0.00000000 sec
F53 0.00000000 sec
F54 0.00000000 sec
F55 0.00000000 sec
F56 0.00000000 sec
F57 0.00000000 sec
F58 0.00000000 sec
F59 0.00000000 sec
F60 0.00000000 sec
F61 0.00000000 sec
F62 0.00000000 sec
F63 0.00000000 sec
F64 0.00000000 sec
F65 0.00000000 sec
F66 0.00000000 sec
F67 0.00000000 sec
F68 0.00000000 sec
F69 0.00000000 sec
F70 0.00000000 sec
F71 0.00000000 sec
F72 0.00000000 sec
F73 0.00000000 sec
F74 0.00000000 sec
F75 0.00000000 sec
F76 0.00000000 sec
F77 0.00000000 sec
F78 0.00000000 sec
F79 0.00000000 sec
F80 0.00000000 sec
F81 0.00000000 sec
F82 0.00000000 sec
F83 0.00000000 sec
F84 0.00000000 sec
F85 0.00000000 sec
F86 0.00000000 sec
F87 0.00000000 sec
F88 0.00000000 sec
F89 0.00000000 sec
F90 0.00000000 sec
F91 0.00000000 sec
F92 0.00000000 sec
F93 0.00000000 sec
F94 0.00000000 sec
F95 0.00000000 sec
F96 0.00000000 sec
F97 0.00000000 sec
F98 0.00000000 sec
F99 0.00000000 sec
F100 0.00000000 sec

```

LGB-13-85-HPLC in CDCl3

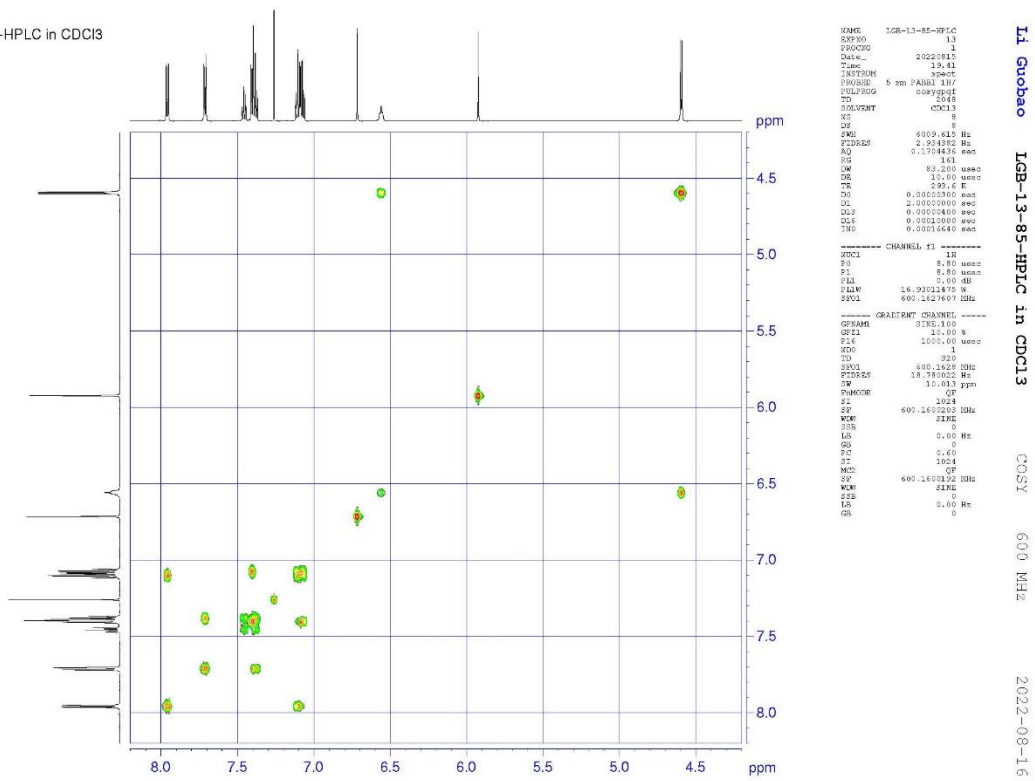

**I1 Guobao**  
**LGB-13-85-HPLC in CDCl3**  
**COSY**  
**600 MHz**  
**2022-08-16**

```

NAME LGB-13-85-HPLC
EXPNO 13
PROCNO 1
Date_ 20220815
Time 19.41
INSTRUM spect
PROBHD 5 mm PABBI 1H/
PULPROG zgpg30
TD 65536
SOLVENT cdcl3
NS 8
DS 4
SWH 6000.648 Hz
FIDRES 2.924392 Hz
AQ 0.1704656 sec
RG 320
DE 16.1
RE 16.00 usec
TE 300.2 K
F2 0.00000000 sec
F3 0.00000000 sec
F4 0.00000000 sec
F5 0.00000000 sec
F6 0.00000000 sec
F7 0.00000000 sec
F8 0.00000000 sec
F9 0.00000000 sec
F10 0.00000000 sec
F11 0.00000000 sec
F12 0.00000000 sec
F13 0.00000000 sec
F14 0.00000000 sec
F15 0.00000000 sec
F16 0.00000000 sec
F17 0.00000000 sec
F18 0.00000000 sec
F19 0.00000000 sec
F20 0.00000000 sec
F21 0.00000000 sec
F22 0.00000000 sec
F23 0.00000000 sec
F24 0.00000000 sec
F25 0.00000000 sec
F26 0.00000000 sec
F27 0.00000000 sec
F28 0.00000000 sec
F29 0.00000000 sec
F30 0.00000000 sec
F31 0.00000000 sec
F32 0.00000000 sec
F33 0.00000000 sec
F34 0.00000000 sec
F35 0.00000000 sec
F36 0.00000000 sec
F37 0.00000000 sec
F38 0.00000000 sec
F39 0.00000000 sec
F40 0.00000000 sec
F41 0.00000000 sec
F42 0.00000000 sec
F43 0.00000000 sec
F44 0.00000000 sec
F45 0.00000000 sec
F46 0.00000000 sec
F47 0.00000000 sec
F48 0.00000000 sec
F49 0.00000000 sec
F50 0.00000000 sec
F51 0.00000000 sec
F52 0.00000000 sec
F53 0.00000000 sec
F54 0.00000000 sec
F55 0.00000000 sec
F56 0.00000000 sec
F57 0.00000000 sec
F58 0.00000000 sec
F59 0.00000000 sec
F60 0.00000000 sec
F61 0.00000000 sec
F62 0.00000000 sec
F63 0.00000000 sec
F64 0.00000000 sec
F65 0.00000000 sec
F66 0.00000000 sec
F67 0.00000000 sec
F68 0.00000000 sec
F69 0.00000000 sec
F70 0.00000000 sec
F71 0.00000000 sec
F72 0.00000000 sec
F73 0.00000000 sec
F74 0.00000000 sec
F75 0.00000000 sec
F76 0.00000000 sec
F77 0.00000000 sec
F78 0.00000000 sec
F79 0.00000000 sec
F80 0.00000000 sec
F81 0.00000000 sec
F82 0.00000000 sec
F83 0.00000000 sec
F84 0.00000000 sec
F85 0.00000000 sec
F86 0.00000000 sec
F87 0.00000000 sec
F88 0.00000000 sec
F89 0.00000000 sec
F90 0.00000000 sec
F91 0.00000000 sec
F92 0.00000000 sec
F93 0.00000000 sec
F94 0.00000000 sec
F95 0.00000000 sec
F96 0.00000000 sec
F97 0.00000000 sec
F98 0.00000000 sec
F99 0.00000000 sec
F100 0.00000000 sec

```

LGB-13-85-HPLC in CDCl3

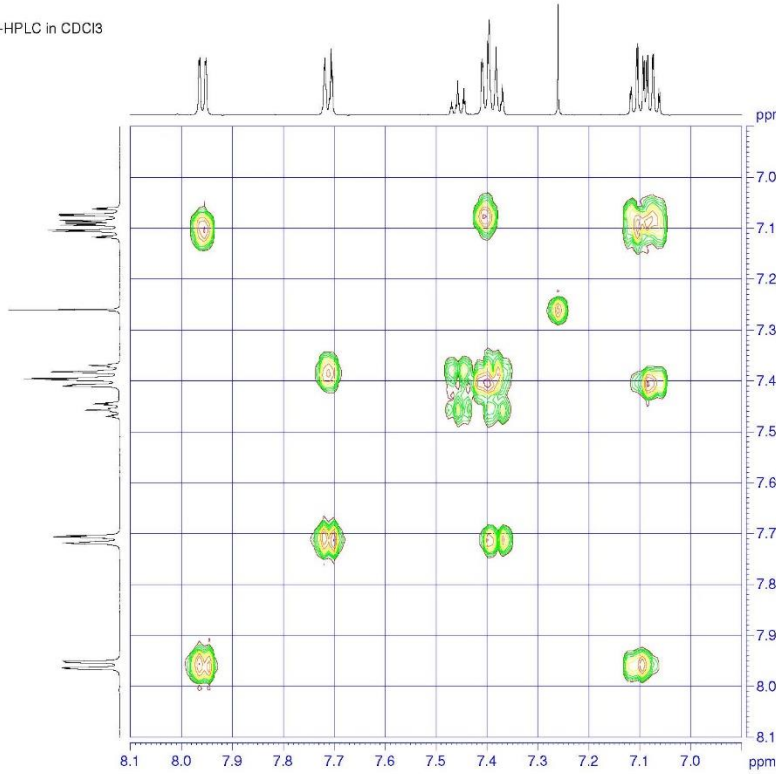

```

NAME LGB-13-85-HPLC
EXPNO 13
PROCNO 1
Date_ 20220815
Time 15:41
INSTRUM spect
PROBHD 5 mm PABBI 1H/
PULPROG zgpg30
TD 32768
SOLVENT CDCl3
NS 8
DS 8
SWH 4009.415 Hz
FIDRES 2.93495 Hz
AQ 0.1704436 sec
RG 103
LW 83.200 usec
DS 11.00 usec
TE 293.2 K
NUC1 13C
NUC2 1H
DE 2.0000000 sec
DLE 0.0000400 sec
DLC 0.0000000 sec
TAC 0.0001640 sec
TMC 0.0001640 sec

----- CHANNEL f1 -----
NUC1 13C
P1 10.00 usec
PL1 0.00 dB
P12 16.0001475 Hz
SFO1 600.1427007 MHz

----- GRADIENT CHANNEL -----
GPMAX 3182.100
GPI 21.00 Hz
P1C 1000.00 usec
NUC 13C
TD 320
SFO1 500.1428 MHz
P1RES 18.780000 Hz
LW 13.00 Hz
PULPROG gp
PC 1024
SF 600.1430000 MHz
WDE 0
SSB 0
LB 0.00 Hz
GB 0
PC 0.60
PT 1024
MC 0
SF 600.1430000 MHz
WDE 0
SSB 0
LB 0.00 Hz
GB 0
  
```

I1 Guobao IGB-13-85-HPLC in CDCl3 COSY 600 MHz 2022-08-16

LGB-13-85-HPLC in CDCl3

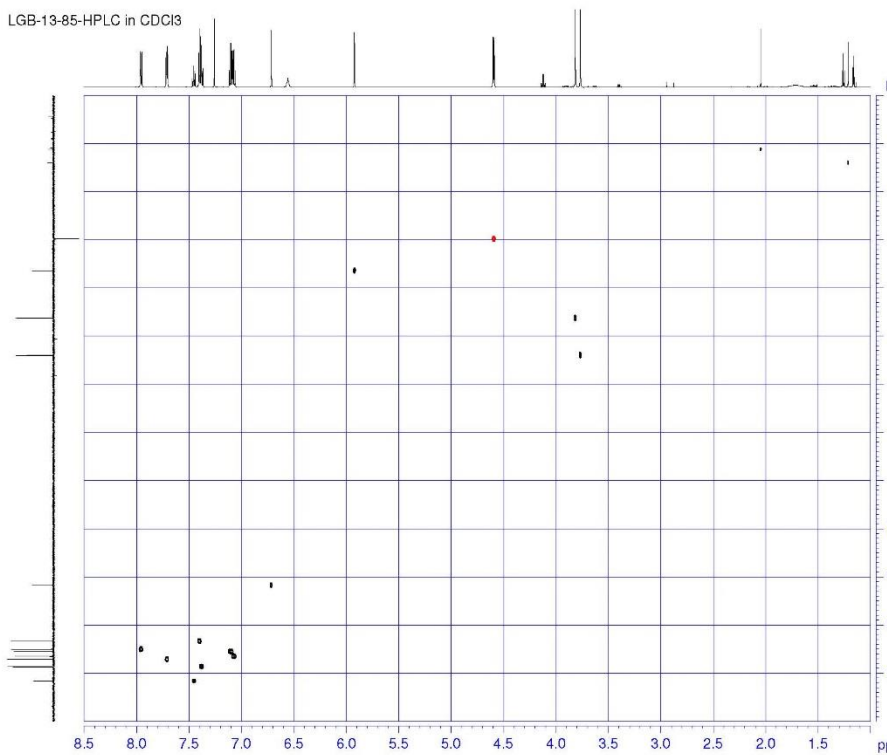

```

NAME LGB-13-85-HPLC
EXPNO 14
PROCNO 1
Date_ 20220815
Time 15:36
INSTRUM spect
PROBHD 5 mm PABBI 1H/
PULPROG zgpg30
TD 32768
SOLVENT CDCl3
NS 8
DS 8
SWH 4009.415 Hz
FIDRES 2.93495 Hz
AQ 0.1704436 sec
RG 103
LW 83.200 usec
DS 11.00 usec
TE 293.2 K
NUC1 13C
NUC2 1H
DE 2.0000000 sec
DLE 0.0000400 sec
DLC 0.0000000 sec
TAC 0.0001640 sec
TMC 0.0001640 sec

----- CHANNEL f1 -----
NUC1 13C
P1 10.00 usec
PL1 0.00 dB
P12 16.0001475 Hz
SFO1 600.1427007 MHz

----- CHANNEL f2 -----
CPDPRG2 sncp
MPC 13C
P1 500.00 usec
PL1 0.00 dB
P12 72.00 usec
PL2 120.00 Hz
PL3 -0.95 dB
PL4 1.00 Hz
PULPROG gp
PC 1024
SF 600.1430000 MHz
WDE 0
SSB 0
LB 0.00 Hz
GB 0
PC 0.60
PT 1024
MC 0
SF 600.1430000 MHz
WDE 0
SSB 0
LB 0.00 Hz
GB 0

----- GRADIENT CHANNEL -----
GPMAX 3182.100
GPI 21.00 Hz
P1C 1000.00 usec
NUC 13C
TD 320
SFO1 500.1428 MHz
P1RES 18.780000 Hz
LW 13.00 Hz
PULPROG gp
PC 1024
SF 600.1430000 MHz
WDE 0
SSB 0
LB 0.00 Hz
GB 0
  
```

I1 Guobao IGB-13-85-HPLC in CDCl3 HSQC 600/151 MHz 2022-08-15

LGB-13-85-HPLC in CDCl3

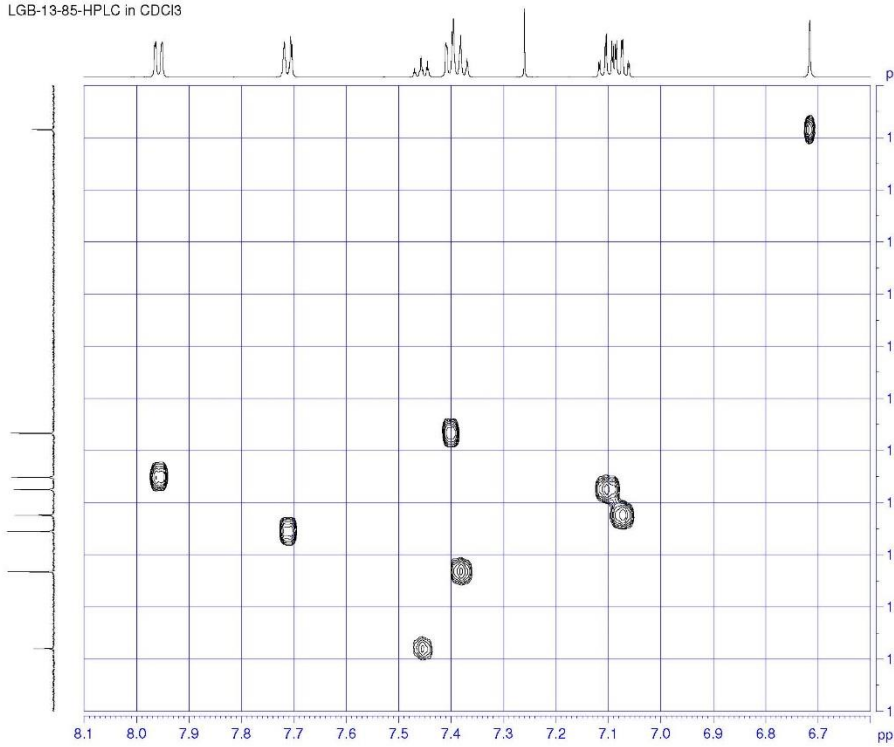

```

NAME      LGB-13-85-HPLC
PROCNO    1
EXPNO     1
F2-     2021015
Time      15.44
INSTRUM   spect
PROBHD    5 mm PABBI 1H/
PULPROG   zgpg30
TD         65536
SOLVENT   CDCl3
NS         2
DS         2
SWH        6092.815 Hz
FIDRES    0.258410 Hz
AQ         0.1704436 sec
RG         2050
DE         82.200 usec
TE         300.000
TD         284.3
CHFT2     145.000000 sec
LO         0.0000000 sec
LI         2.0000000 sec
LJ         0.0007264 sec
LK         0.0000000 sec
LL         0.0000000 sec
LM         0.0000000 sec
LN         0.0000000 sec
LO         0.0000000 sec
----- CHANNEL f1 -----
NUC1       1H
P1         9.70 usec
PL1        17.50 dB
PC1        0.00 dB
PLW        16.50011475 Hz
SFO1       500.1430100 MHz
----- CHANNEL f2 -----
CHRG2      13C
NUC2       13C
P2         15.50 usec
PL2        19.00 dB
PC2        0.00 dB
PLW        129.10747030 MHz
SFO2       125.7613500 MHz
----- GRADIENT CHANNEL -----
GRNAG      SINE.100
GRNAB      SINE.100
GRNAC      SINE.100
SFO3       50.00 Hz
SFO4       40.10 Hz
PLG        1000.00 usec
TD         2
DE         150.92249 MHz
SFO1       115.525719 MHz
SFO2       170.000000 ppm
F2H2DU     Echo-ARG-1400
SI         2048
DE         600.1600211 MHz
NUC         13C
SFO        0.00 Hz
GB         0
PC         1.48
ST         2048
SI         150.9192217 MHz
SFO        0.00 Hz
GB         0
    
```

I1 Guobao IGB-13-85-HPLC in CDCl3 HSQC 500/151 MHz 2022-08-15

LGB-13-85-HPLC in CDCl3

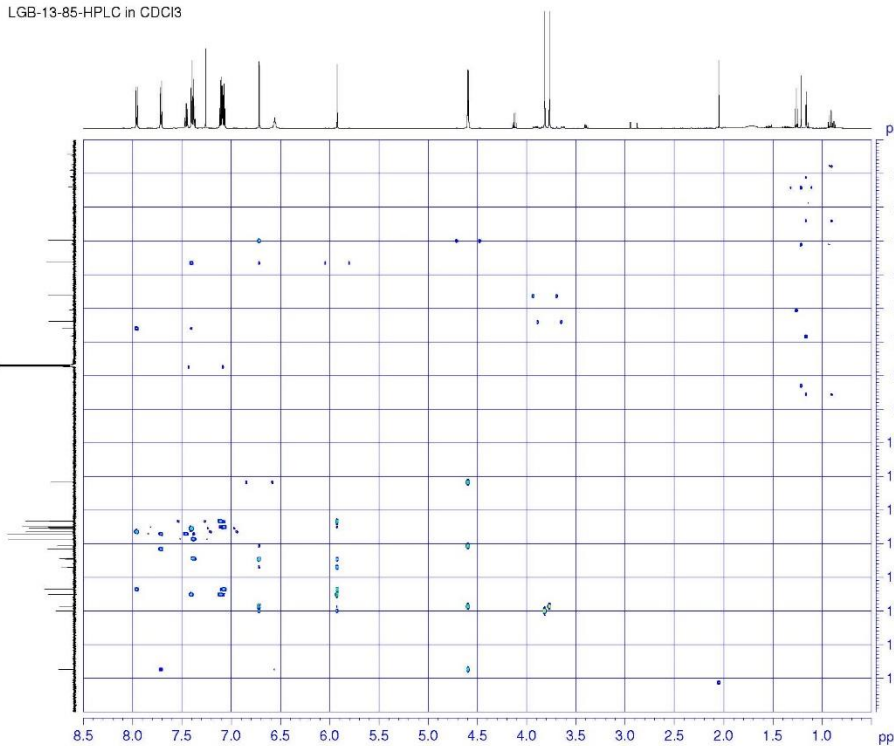

```

NAME      LGB-13-85-HPLC
PROCNO    1
EXPNO     1
F2-     2021015
Time      16.44
INSTRUM   spect
PROBHD    5 mm PABBI 1H/
PULPROG   zgpg30
TD         65536
SOLVENT   CDCl3
NS         2
DS         2
SWH        7812.510 Hz
FIDRES    1.207349 Hz
AQ         0.2621940 sec
RG         2050
DE         65.000 usec
TE         300.000
TD         284.3
CHFT2     145.000000 sec
LO         0.0000000 sec
LI         1.7184803 sec
LJ         0.0004483 sec
LK         0.0000000 sec
LL         0.0000000 sec
LM         0.0000000 sec
LN         0.0000000 sec
LO         0.0000000 sec
----- CHANNEL f1 -----
NUC1       1H
P1         9.70 usec
PL1        17.50 dB
PC1        0.00 dB
PLW        16.50011475 Hz
SFO1       500.1430100 MHz
----- CHANNEL f2 -----
CHRG2      13C
NUC2       13C
P2         15.50 usec
PL2        19.00 dB
PC2        0.00 dB
PLW        129.10747030 MHz
SFO2       125.7613500 MHz
----- GRADIENT CHANNEL -----
GRNAG      SINE.100
GRNAB      SINE.100
GRNAC      SINE.100
SFO3       50.00 Hz
SFO4       40.10 Hz
PLG        1000.00 usec
TD         2
DE         150.92249 MHz
SFO1       104.750404 Hz
SFO2       225.000000 ppm
F2H2DU     Echo-ARG-1400
SI         2048
DE         600.1600211 MHz
NUC         13C
SFO        0.00 Hz
GB         0
PC         1.48
ST         2048
SI         150.9192217 MHz
SFO        0.00 Hz
GB         0
    
```

I1 Guobao IGB-13-85-HPLC in CDCl3 HMQC 500/151 MHz 2022-08-15



LGB-13-85-HPLC in CDCl3

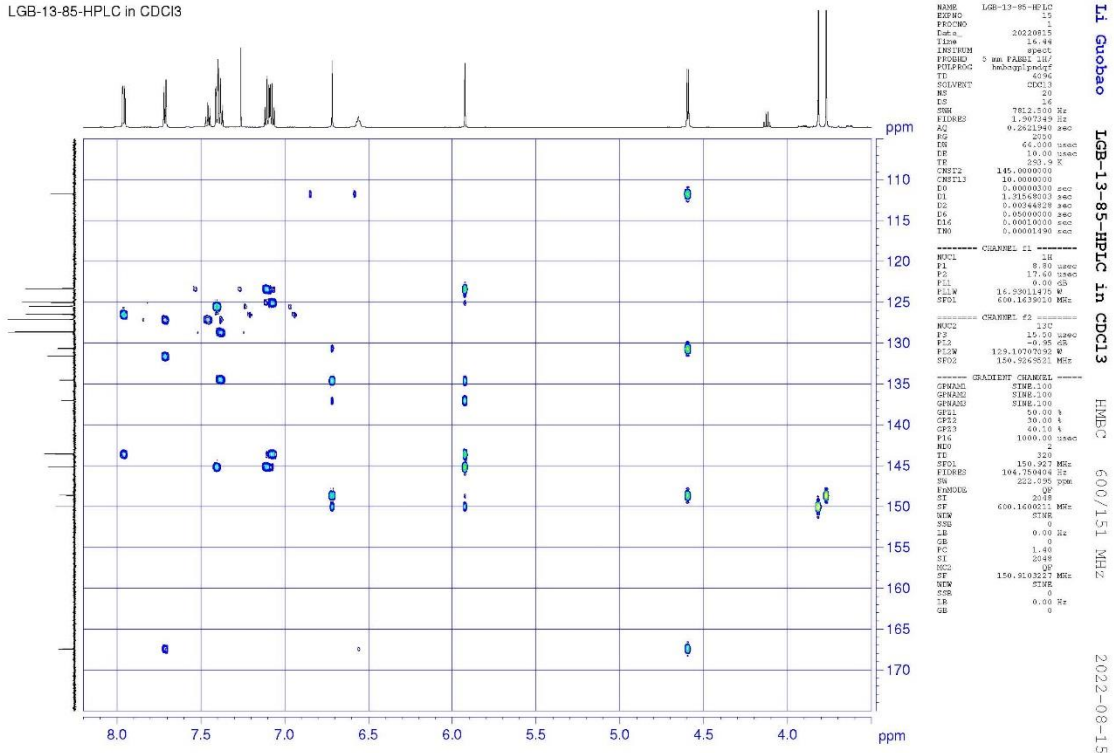

LGB-13-85-HPLC in CDCl3

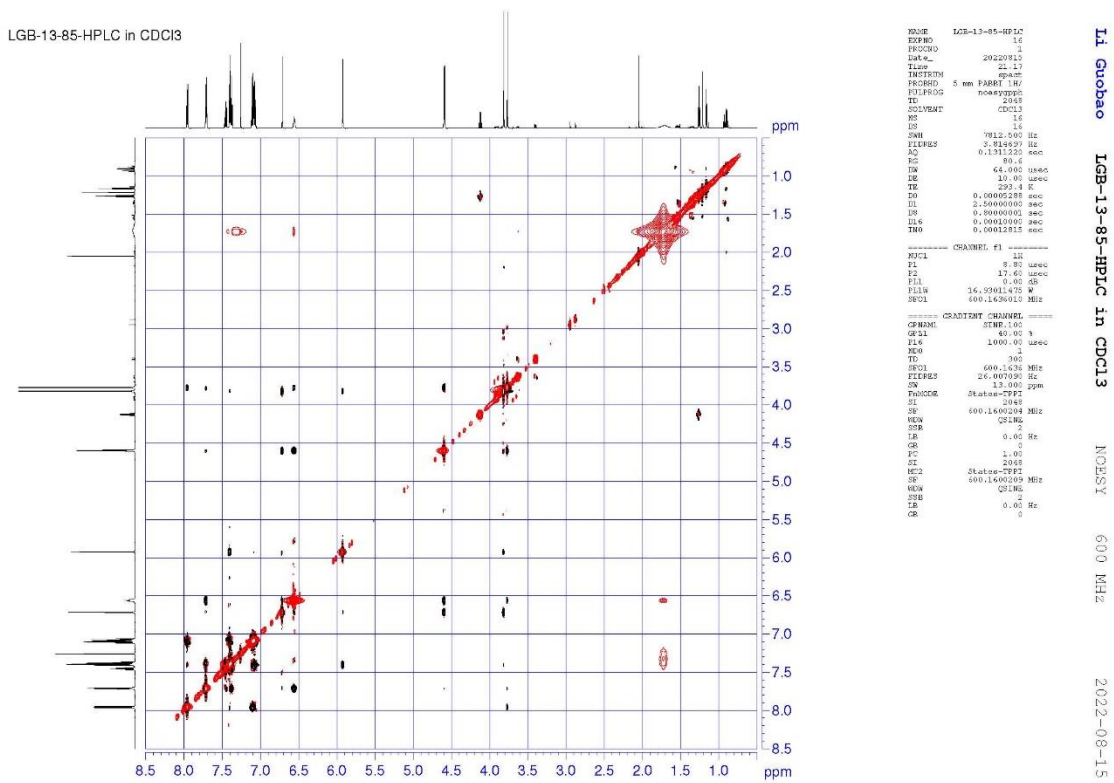

LGB-13-63 in CDCl<sub>3</sub>

NMR Data were recorded at ambient temperature on a Bruker DRX 500 spectrometer operating at 500.1 MHz for <sup>1</sup>H and 125.8 MHz for <sup>13</sup>C. Chemical shifts  $\delta$  are given in ppm relative to TMS. The solvent signals were used as reference (<sup>1</sup>H:  $\delta_H$  7.260 ppm residual CHCl<sub>3</sub>, <sup>13</sup>C:  $\delta_C$  77.16 ppm). Coupling constants were given in Hertz and determined assuming first-order spin-spin coupling.

red <sup>13</sup>C chemical shift  
blue <sup>1</sup>H chemical shift

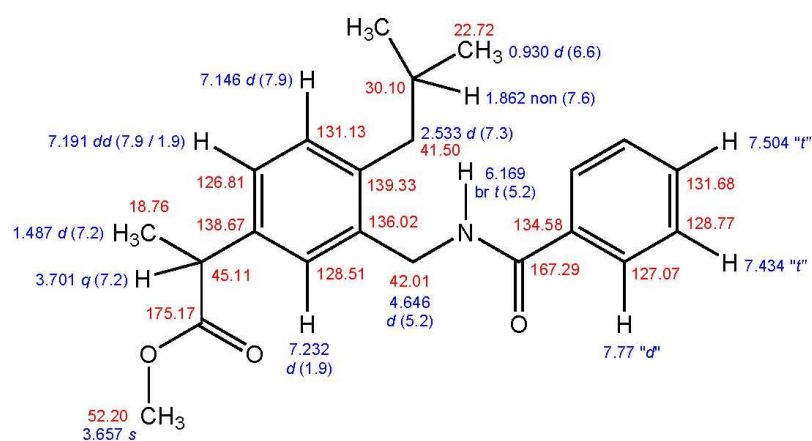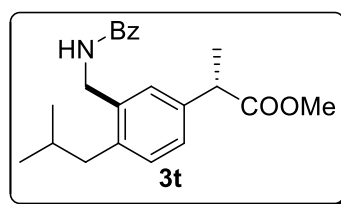

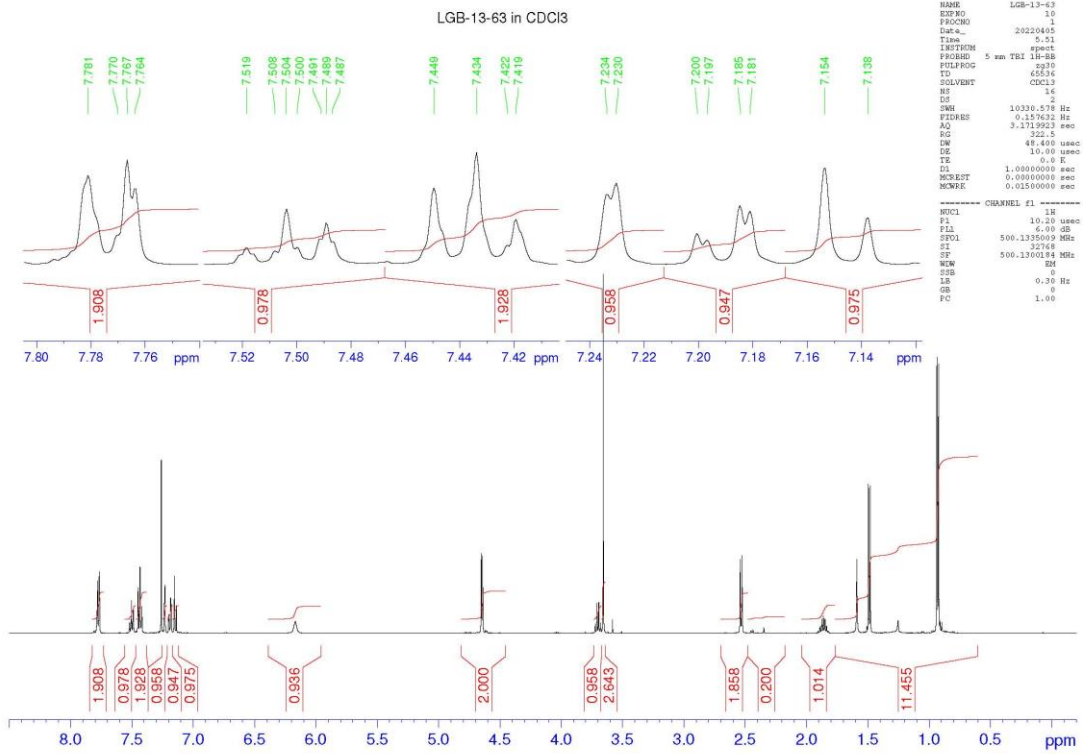

IJ Guobao LGB-13-63 in CDCl3

1H-NMR

500 MHz

2022-04-05

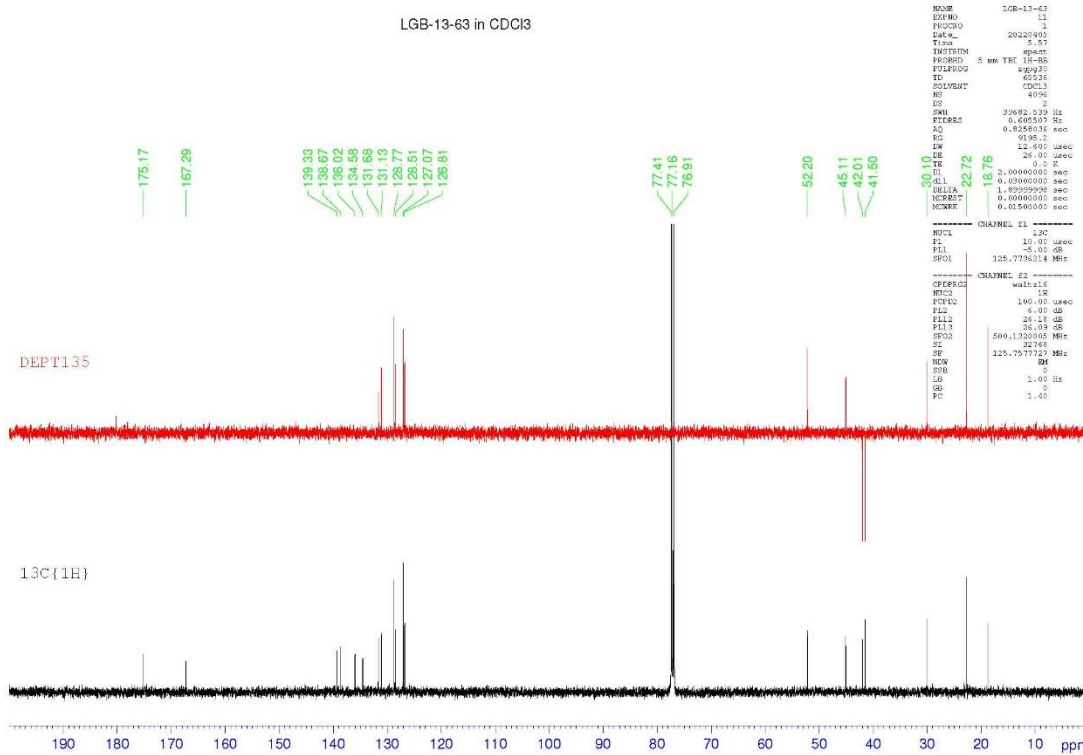

IJ Guobao LGB-13-63 in CDCl3

13C-NMR

125.8 MHz

2022-04-05

LGB-13-63 in CDCl3

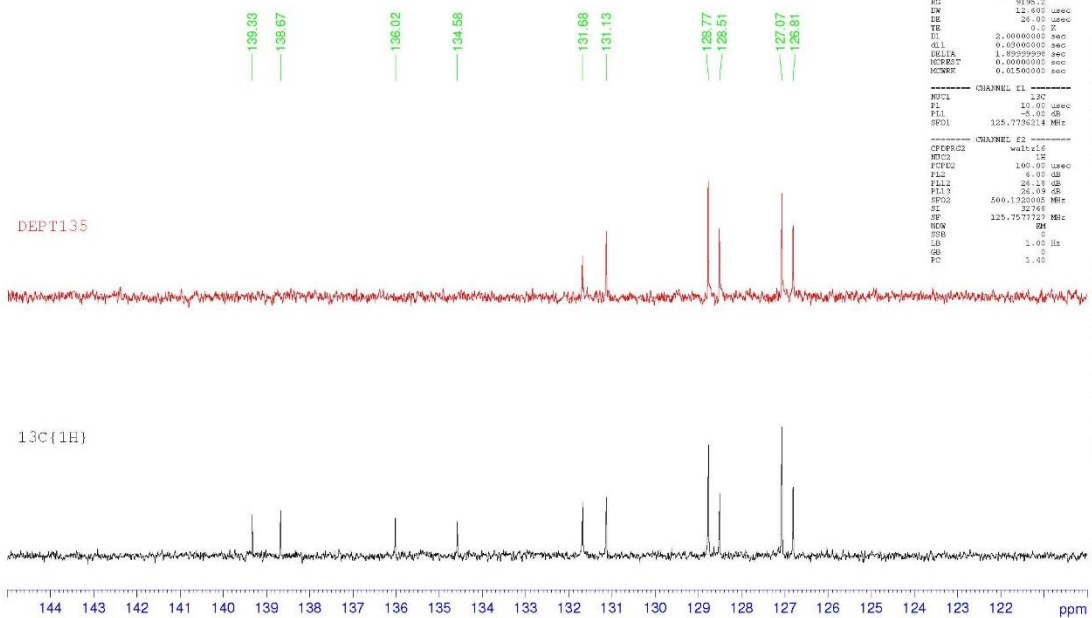

**NAME** LGB-13-63  
**EXPNO** 13  
**PROCNO** 1  
**DAT\_** 20220405  
**Time** 11:57  
**INSTRUM** spect  
**PROBHD** 5 mm TBI 1H-13  
**PULPROG** zgpg30  
**TD** 65536  
**SOLVENT** CDCl3  
**NS** 8  
**DS** 4  
**SWH** 39082.533 Hz  
**FREQS** 125.757121 MHz  
**AQ** 0.8258036 sec  
**RG** 385.5  
**DW** 12.600 usec  
**DE** 24.00 usec  
**TE** 300.2 K  
**NUC1** 13C  
**NUC2** 1H  
**Q1** 0.0000000 sec  
**Q2** 0.0000000 sec  
**Q3** 0.0000000 sec  
**Q4** 0.0000000 sec  
**Q5** 0.0000000 sec  
**Q6** 0.0000000 sec  
**Q7** 0.0000000 sec  
**Q8** 0.0000000 sec

**NAME** LGB-13-63  
**EXPNO** 13  
**PROCNO** 1  
**DAT\_** 20220405  
**Time** 11:57  
**INSTRUM** spect  
**PROBHD** 5 mm TBI 1H-13  
**PULPROG** zgpg30  
**TD** 65536  
**SOLVENT** CDCl3  
**NS** 8  
**DS** 4  
**SWH** 39082.533 Hz  
**FREQS** 125.757121 MHz  
**AQ** 0.8258036 sec  
**RG** 385.5  
**DW** 12.600 usec  
**DE** 24.00 usec  
**TE** 300.2 K  
**NUC1** 13C  
**NUC2** 1H  
**Q1** 0.0000000 sec  
**Q2** 0.0000000 sec  
**Q3** 0.0000000 sec  
**Q4** 0.0000000 sec  
**Q5** 0.0000000 sec  
**Q6** 0.0000000 sec  
**Q7** 0.0000000 sec  
**Q8** 0.0000000 sec

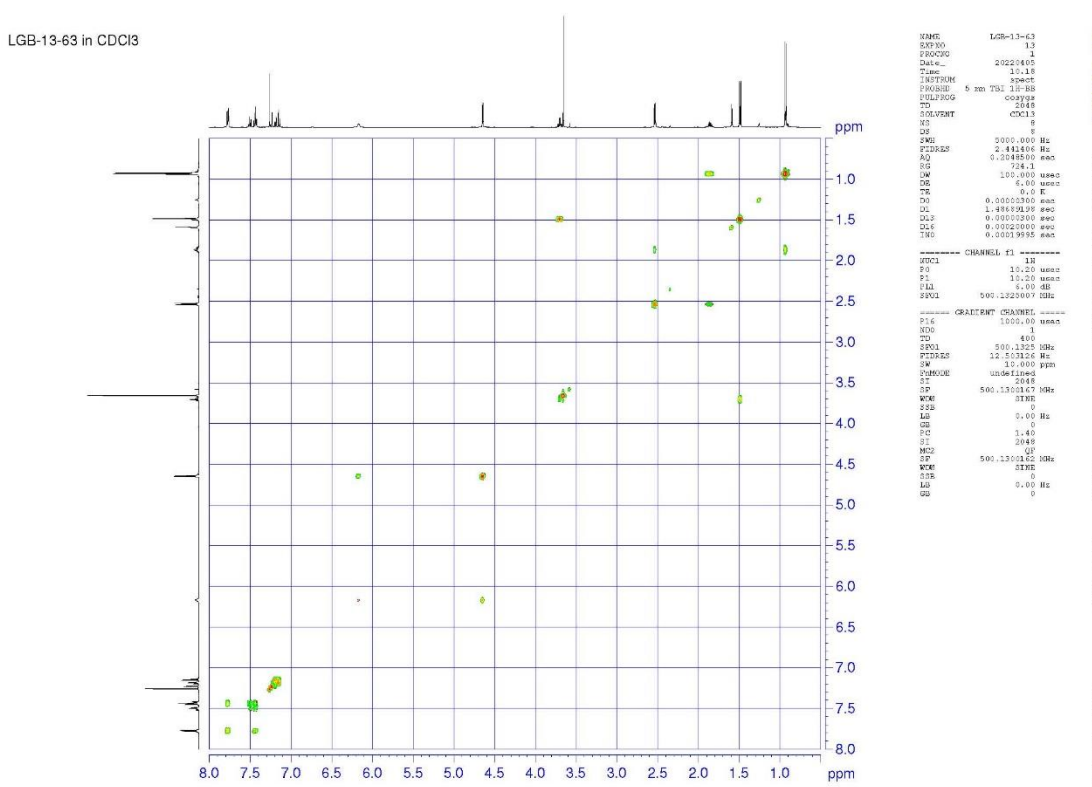

**NAME** LGB-13-63  
**EXPNO** 13  
**PROCNO** 1  
**DAT\_** 20220405  
**Time** 11:18  
**INSTRUM** spect  
**PROBHD** 5 mm TBI 1H-13  
**PULPROG** zgpg30  
**TD** 65536  
**SOLVENT** CDCl3  
**NS** 8  
**DS** 4  
**SWH** 39082.533 Hz  
**FREQS** 125.757121 MHz  
**AQ** 0.8258036 sec  
**RG** 385.5  
**DW** 12.600 usec  
**DE** 24.00 usec  
**TE** 300.2 K  
**NUC1** 13C  
**NUC2** 1H  
**Q1** 0.0000000 sec  
**Q2** 0.0000000 sec  
**Q3** 0.0000000 sec  
**Q4** 0.0000000 sec  
**Q5** 0.0000000 sec  
**Q6** 0.0000000 sec  
**Q7** 0.0000000 sec  
**Q8** 0.0000000 sec

**NAME** LGB-13-63  
**EXPNO** 13  
**PROCNO** 1  
**DAT\_** 20220405  
**Time** 11:18  
**INSTRUM** spect  
**PROBHD** 5 mm TBI 1H-13  
**PULPROG** zgpg30  
**TD** 65536  
**SOLVENT** CDCl3  
**NS** 8  
**DS** 4  
**SWH** 39082.533 Hz  
**FREQS** 125.757121 MHz  
**AQ** 0.8258036 sec  
**RG** 385.5  
**DW** 12.600 usec  
**DE** 24.00 usec  
**TE** 300.2 K  
**NUC1** 13C  
**NUC2** 1H  
**Q1** 0.0000000 sec  
**Q2** 0.0000000 sec  
**Q3** 0.0000000 sec  
**Q4** 0.0000000 sec  
**Q5** 0.0000000 sec  
**Q6** 0.0000000 sec  
**Q7** 0.0000000 sec  
**Q8** 0.0000000 sec

LGB-13-63 in CDCl3

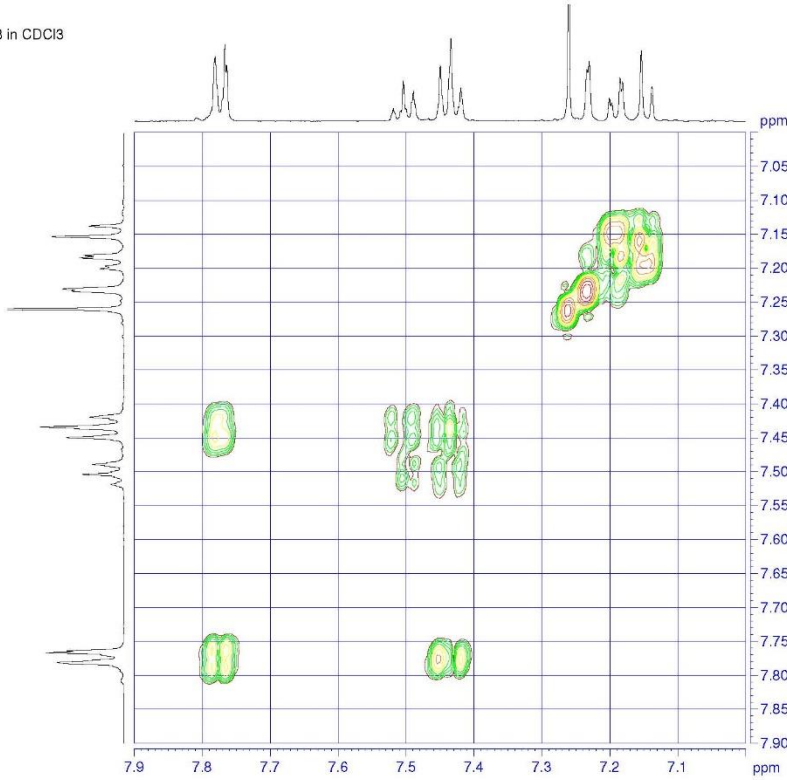

NAME LGB-13-63  
EXPNO 1  
PROCNO 1  
Date\_ 20220405  
Time 11:18  
INSTRUM spect  
PROBHD 5 mm TBI 1H-5B  
PULPROG zgpg30  
TD 65536  
SOLVENT CDCl3  
NS 8  
DS 8  
SWH 5000.900 Hz  
FIDRES 2.441846 Hz  
AQ 0.3048500 sec  
RG 324.1  
SQ 100.000000  
WDW EM  
SSB 0.0 Hz  
GB 0.000000  
DC 1.49690429 sec  
DELTA 0.00000000 sec  
DLE 0.00200000 sec  
DTE 0.00000000 sec  
TMC 0.00000000 sec

----- CHANNEL f1 -----  
NUC1 13C  
P1 10.20 usec  
PL 0.00 dB  
SFO1 100.6284700 MHz  
----- GRADIENT CHANNEL -----  
P16 1000.00 usec  
NUC16 13C  
P16 10.20 usec  
PL16 0.00 dB  
SFO16 100.6284700 MHz  
WDW EM  
SSB 0.0 Hz  
GB 0.000000  
DC 1.40  
DELTA 2848  
MDELTA 0.00  
SFO 500.1301022 MHz  
WDW EM  
SSB 0.0 Hz  
GB 0.000000

1H Guobao IGB-13-63 in CDCl3 COSY 500 MHz 2022-04-05

LGB-13-63 in CDCl3

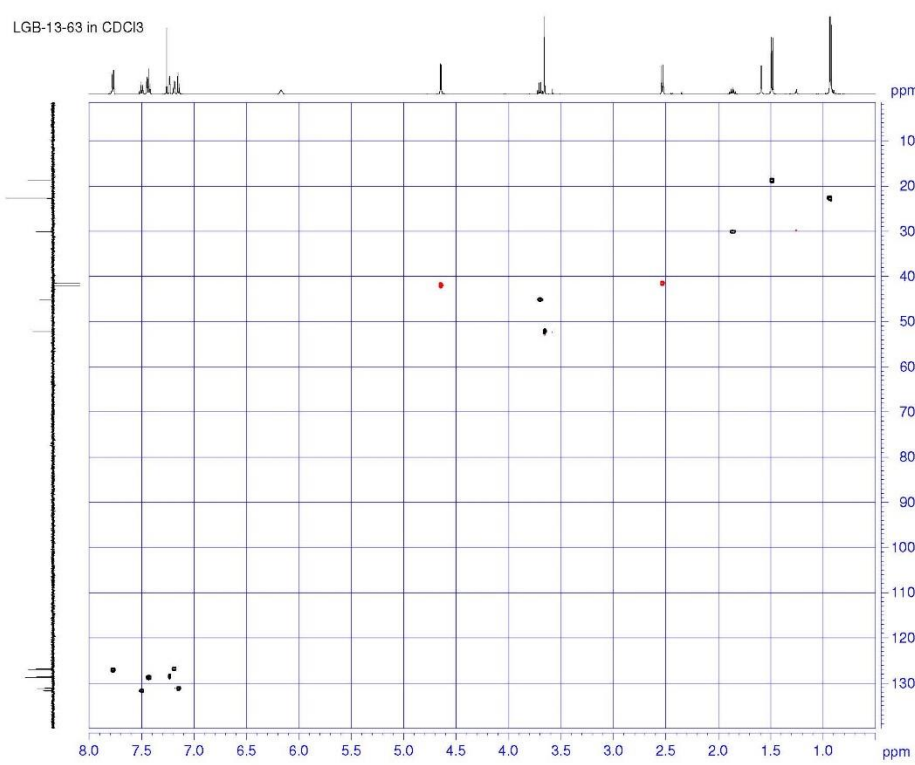

NAME LGB-13-63  
EXPNO 1  
PROCNO 1  
Date\_ 20220405  
Time 11:52  
INSTRUM spect  
PROBHD 5 mm TBI 1H-5B  
PULPROG zgpg30  
TD 65536  
SOLVENT CDCl3  
NS 8  
DS 8  
SWH 5000.900 Hz  
FIDRES 2.441846 Hz  
AQ 0.3048500 sec  
RG 324.1  
SQ 100.000000  
WDW EM  
SSB 0.0 Hz  
GB 0.000000  
DC 1.40  
DELTA 2848  
MDELTA 0.00  
SFO 500.1301022 MHz  
WDW EM  
SSB 0.0 Hz  
GB 0.000000

----- CHANNEL f1 -----  
NUC1 13C  
P1 10.20 usec  
PL 0.00 dB  
SFO1 100.6284700 MHz  
----- CHANNEL f2 -----  
NUC2 1H  
P2 8.70 usec  
PL 2.00 dB  
SFO2 500.1301022 MHz  
WDW EM  
SSB 0.0 Hz  
GB 0.000000  
DC 1.40  
DELTA 2848  
MDELTA 0.00  
SFO 500.1301022 MHz  
WDW EM  
SSB 0.0 Hz  
GB 0.000000

1H Guobao IGB-13-63 in CDCl3 HSQC 500/125 MHz 2022-04-05

LGB-13-63 in CDCl3

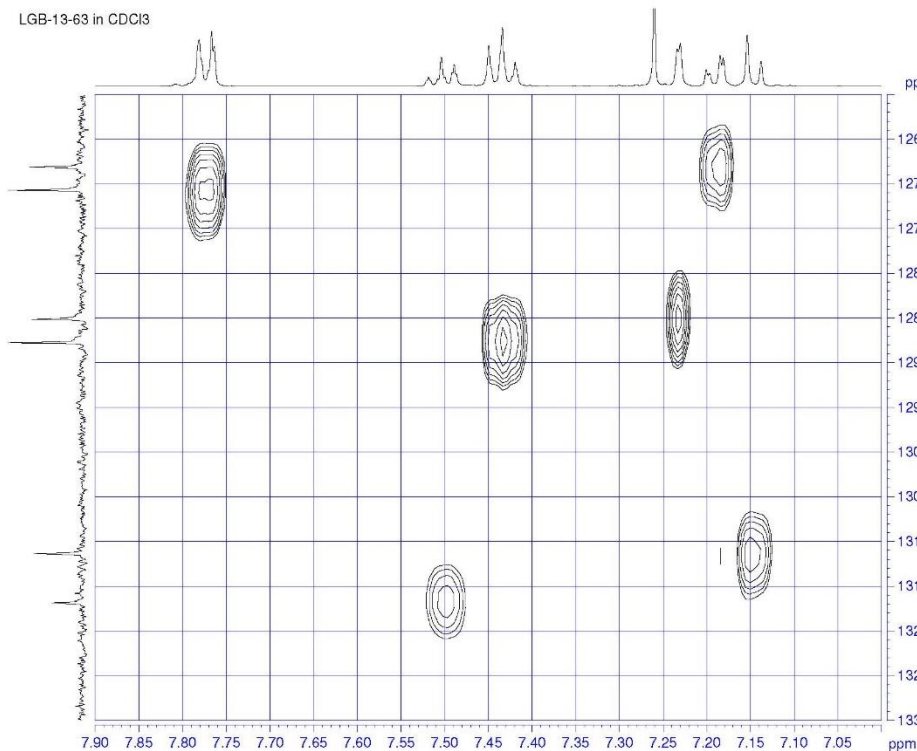

**1H Guobao IGB-13-63 in CDCl3**  
 HSC02 500/125 MHz  
 2022-04-05

```

NAME      LGB-13-63
EXPNO    1
PROCNO   1
Date_    20220405
Time     15.24
INSTRUM  spect
PROBHD   5 mm TBI 1H-5B
PULPROG  zgpg30
TD        65536
SOLVENT  CDCl3
NS        2048
DS        4
SWH       5492.456 Hz
FIDRES   0.1898216 sec
AQ        0.1898216 sec
RG         320
SF        500.136093 MHz
WDW       EM
SSB       0
LB        0.00 Hz
GB        0
PC        1.40
SI        3274
SC        98
DC        0
MC        125.75759 MHz
STW       STW
SR        0
LB        0.00 Hz
GB        0

----- CHANNEL f1 -----
NUC1      1H
P1        12.00 usec
PR        20.00 usec
PC        6.00 dB
SFO1     500.132507 MHz

----- CHANNEL f2 -----
CPDPRG2  zgpg30
NUC2      13C
P2        8.70 usec
PR        17.40 usec
PC        6.00 dB
SFO2     125.75759 MHz

----- GRADIENT CHANNEL -----
G1        2
P1G       1000.00 usec
M1G       2
TD        400
SF1G      125.75759 MHz
FIDRES1   75.471590 Hz
SR1G      240.023 usec
EPC1G     unshaped
SI1G      3274
SF1G      500.136093 MHz
STW1G     STW
SR1G      0
LB1G      0.00 Hz
GB1G      0
PC1G      1.40
SI1G     3274
SC1G     98
DC1G     0
MC1G     125.75759 MHz
STW1G     STW
SR1G      0
LB1G      0.00 Hz
GB1G      0
  
```

LGB-13-63 in CDCl3

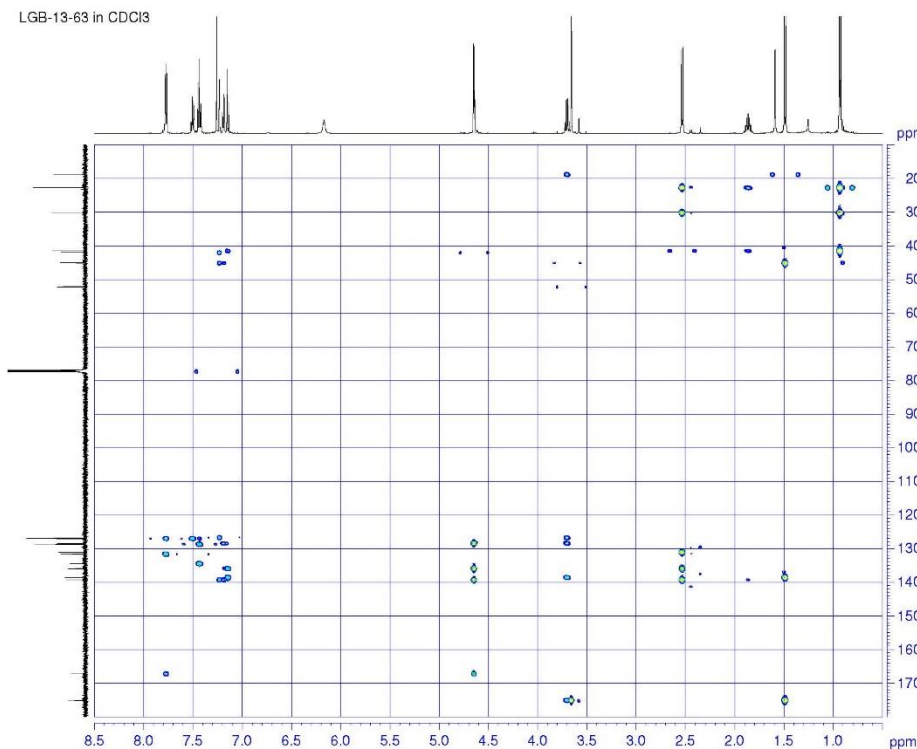

**13C Guobao IGB-13-63 in CDCl3**  
 HMB02 500/125 MHz  
 2022-04-05

```

NAME      LGB-13-63
EXPNO    1
PROCNO   1
Date_    20220405
Time     15.24
INSTRUM  spect
PROBHD   5 mm TBI 1H-5B
PULPROG  zgpg30
TD        65536
SOLVENT  CDCl3
NS        2048
DS        4
SWH       5492.456 Hz
FIDRES   0.1898216 sec
AQ        0.1898216 sec
RG         320
SF        500.136093 MHz
WDW       EM
SSB       0
LB        0.00 Hz
GB        0
PC        1.40
SI        3274
SC        98
DC        0
MC        125.75759 MHz
STW       STW
SR        0
LB        0.00 Hz
GB        0

----- CHANNEL f1 -----
NUC1      1H
P1        12.00 usec
PR        20.00 usec
PC        6.00 dB
SFO1     500.132507 MHz

----- CHANNEL f2 -----
CPDPRG2  zgpg30
NUC2      13C
P2        8.70 usec
PR        17.40 usec
PC        6.00 dB
SFO2     125.75759 MHz

----- GRADIENT CHANNEL -----
G1        2
P1G       1000.00 usec
M1G       2
TD        400
SF1G      125.75759 MHz
FIDRES1   75.471590 Hz
SR1G      240.023 usec
EPC1G     unshaped
SI1G      3274
SF1G      500.136093 MHz
STW1G     STW
SR1G      0
LB1G      0.00 Hz
GB1G      0
PC1G      1.40
SI1G     3274
SC1G     98
DC1G     0
MC1G     125.75759 MHz
STW1G     STW
SR1G      0
LB1G      0.00 Hz
GB1G      0
  
```

LGB-13-63 in CDCl3

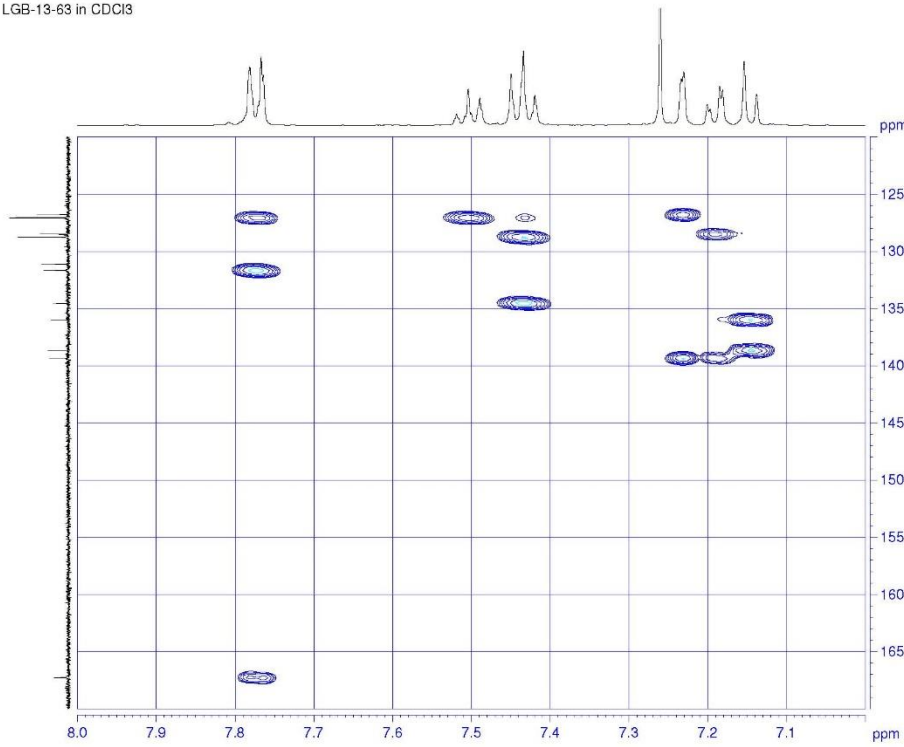

NAME LGB-13-63  
EXPNO 1  
PROCNO 1  
Date\_ 20220405  
Time 15.24  
INSTRUM spect  
PROBHD 5 mm TBI 1H-13  
PULPROG invgpg1p4d  
TD 2048  
TE 298  
SOLVENT CDCl3  
NS 24  
DS 24  
SWH 5492.456 Hz  
FIDRES 2.974990 Hz  
AQ 0.1848276 sec  
RG 18284  
FR 91.200 sec  
TE 6.00 sec  
TD 0.0  
DO 0.0000000 sec  
LL 1.5000000 sec  
LE 0.0034500 sec  
DS 0.0250000 sec  
UL 0.0000000 sec  
LLS 0.0002000 sec  
TMO 0.0001256 sec

----- CHANNEL f1 -----  
NUC1 13C  
P1 10.00 usec  
P2 20.00 usec  
PL1 4.00 dB  
PL2 5.00 dB  
SFO1 500.132507 MHz

----- CHANNEL f2 -----  
NUC2 13C  
P3 8.70 usec  
PL3 5.00 dB  
SFO2 125.7728299 MHz

----- GRADIENT CHANNEL -----  
G1 1000.00 usec  
G2 2  
G3 400  
SFO1 125.7728 MHz  
FIDRES 75.471590 Hz  
SW 249.025 ppm  
F2DELU unsh11p4d  
SI 2048  
SF 500.1300000 MHz  
WDW STRF  
SSB 0  
LB 0.00 Hz  
GB 0  
PC 1.40  
SI 1024  
SC 0  
SF 125.7577659 MHz  
WDW STRF  
SSB 0  
LB 0.00 Hz  
GB 0

Li Guobao IGB-13-63 in CDCl3 HMBC 500/125 MHz 2022-04-05

LGB-13-63 in CDCl3

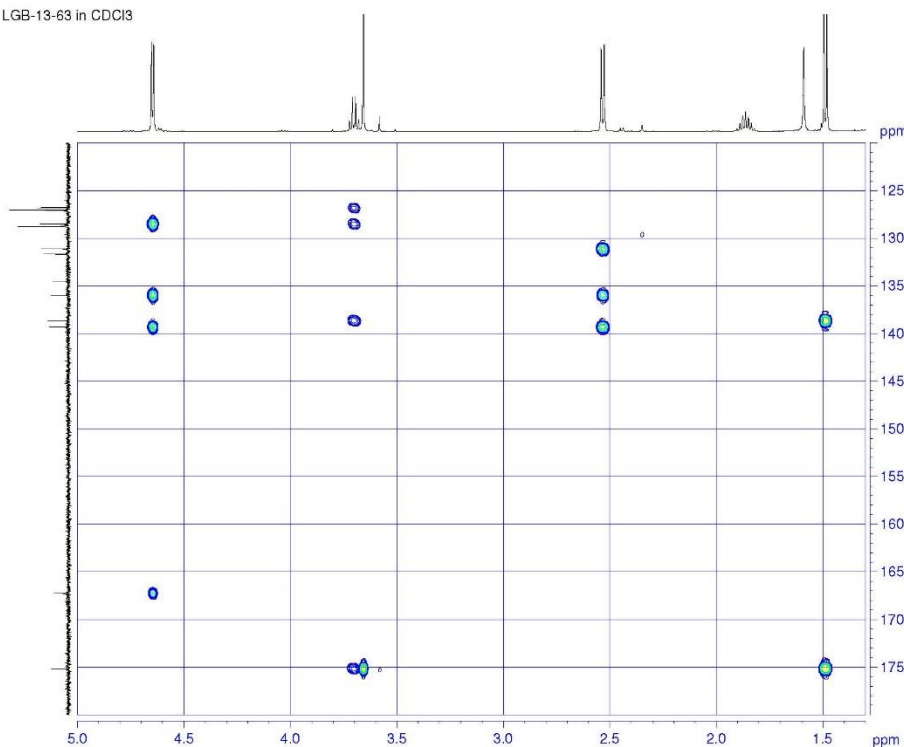

NAME LGB-13-63  
EXPNO 1  
PROCNO 1  
Date\_ 20220405  
Time 15.24  
INSTRUM spect  
PROBHD 5 mm TBI 1H-13  
PULPROG invgpg1p4d  
TD 2048  
TE 298  
SOLVENT CDCl3  
NS 24  
DS 24  
SWH 5492.456 Hz  
FIDRES 2.974990 Hz  
AQ 0.1848276 sec  
RG 18284  
FR 91.200 sec  
TE 6.00 sec  
TD 0.0  
DO 0.0000000 sec  
LL 1.5000000 sec  
LE 0.0034500 sec  
DS 0.0250000 sec  
UL 0.0000000 sec  
LLS 0.0002000 sec  
TMO 0.0001256 sec

----- CHANNEL f1 -----  
NUC1 13C  
P1 10.00 usec  
P2 20.00 usec  
PL1 4.00 dB  
PL2 5.00 dB  
SFO1 500.132507 MHz

----- CHANNEL f2 -----  
NUC2 13C  
P3 8.70 usec  
PL3 5.00 dB  
SFO2 125.7728299 MHz

----- GRADIENT CHANNEL -----  
G1 1000.00 usec  
G2 2  
G3 400  
SFO1 125.7728 MHz  
FIDRES 75.471590 Hz  
SW 249.025 ppm  
F2DELU unsh11p4d  
SI 2048  
SF 500.1300000 MHz  
WDW STRF  
SSB 0  
LB 0.00 Hz  
GB 0  
PC 1.40  
SI 1024  
SC 0  
SF 125.7577659 MHz  
WDW STRF  
SSB 0  
LB 0.00 Hz  
GB 0

Li Guobao IGB-13-63 in CDCl3 HMBC 500/125 MHz 2022-04-05

LGB-13-63 in CDCl3

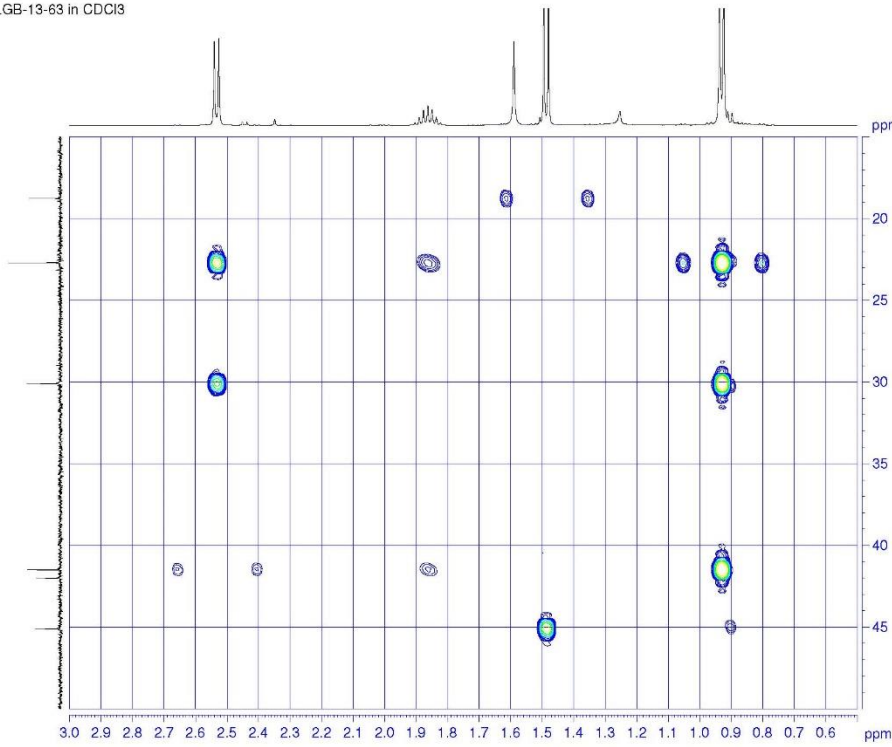

**I1 Guobao IGB-13-63 in CDCl3**  
 HMRG 500/125 MHz  
 2022-04-05

```

NAME      LGB-13-63
EXPNO    1
PROCNO   1
Date_    20220405
Time     15.14
INSTRUM  spect
PROBHD   5 mm TBI HX-BB
PULPROG  zgpg30
TD        65536
SFO1     500.136099 MHz
TE        300.2
SOLVENT  CDCl3
NS        2048
DS        4
SWH       5482.456 Hz
FIDRES   0.1848276 sec
AQ        0.1848276 sec
RG        91.200 uspec
TE        6.00 uspec
TD        0.0
DO        0.0000000 sec
DL        1.0000000 sec
IL        0.0000000 sec
IS        0.0000000 sec
US        0.0000000 sec
LH        0.0000000 sec
LL        0.0000000 sec
TMO       0.0001256 sec

===== CHANNEL f1 =====
NUC1      1H
P1         10.00 usec
P2         20.00 usec
PL1        0.00 dB
PL2        0.00 dB
SFO1      500.136099 MHz

===== CHANNEL f2 =====
NUC2      13C
P3         8.00 usec
PL3        0.00 dB
SFO2      125.7729299 MHz

===== GRADIENT CHANNEL =====
GPRG1     sine,100
GPRG2     sine,100
GPRG3     0.00 %
GPRG4     0.00 %
GPRG5     0.00 %
GPRG6     0.00 %
GPRG7     0.00 %
GPRG8     0.00 %
GPRG9     0.00 %
GPRG10    0.00 %
GPRG11    0.00 %
GPRG12    0.00 %
GPRG13    0.00 %
GPRG14    0.00 %
GPRG15    0.00 %
GPRG16    0.00 %
GPRG17    0.00 %
GPRG18    0.00 %
GPRG19    0.00 %
GPRG20    0.00 %
GPRG21    0.00 %
GPRG22    0.00 %
GPRG23    0.00 %
GPRG24    0.00 %
GPRG25    0.00 %
GPRG26    0.00 %
GPRG27    0.00 %
GPRG28    0.00 %
GPRG29    0.00 %
GPRG30    0.00 %
GPRG31    0.00 %
GPRG32    0.00 %
GPRG33    0.00 %
GPRG34    0.00 %
GPRG35    0.00 %
GPRG36    0.00 %
GPRG37    0.00 %
GPRG38    0.00 %
GPRG39    0.00 %
GPRG40    0.00 %
GPRG41    0.00 %
GPRG42    0.00 %
GPRG43    0.00 %
GPRG44    0.00 %
GPRG45    0.00 %
GPRG46    0.00 %
GPRG47    0.00 %
GPRG48    0.00 %
GPRG49    0.00 %
GPRG50    0.00 %
GPRG51    0.00 %
GPRG52    0.00 %
GPRG53    0.00 %
GPRG54    0.00 %
GPRG55    0.00 %
GPRG56    0.00 %
GPRG57    0.00 %
GPRG58    0.00 %
GPRG59    0.00 %
GPRG60    0.00 %
GPRG61    0.00 %
GPRG62    0.00 %
GPRG63    0.00 %
GPRG64    0.00 %
GPRG65    0.00 %
GPRG66    0.00 %
GPRG67    0.00 %
GPRG68    0.00 %
GPRG69    0.00 %
GPRG70    0.00 %
GPRG71    0.00 %
GPRG72    0.00 %
GPRG73    0.00 %
GPRG74    0.00 %
GPRG75    0.00 %
GPRG76    0.00 %
GPRG77    0.00 %
GPRG78    0.00 %
GPRG79    0.00 %
GPRG80    0.00 %
GPRG81    0.00 %
GPRG82    0.00 %
GPRG83    0.00 %
GPRG84    0.00 %
GPRG85    0.00 %
GPRG86    0.00 %
GPRG87    0.00 %
GPRG88    0.00 %
GPRG89    0.00 %
GPRG90    0.00 %
GPRG91    0.00 %
GPRG92    0.00 %
GPRG93    0.00 %
GPRG94    0.00 %
GPRG95    0.00 %
GPRG96    0.00 %
GPRG97    0.00 %
GPRG98    0.00 %
GPRG99    0.00 %
GPRG100   0.00 %
  
```

LGB-13-63 in CDCl3

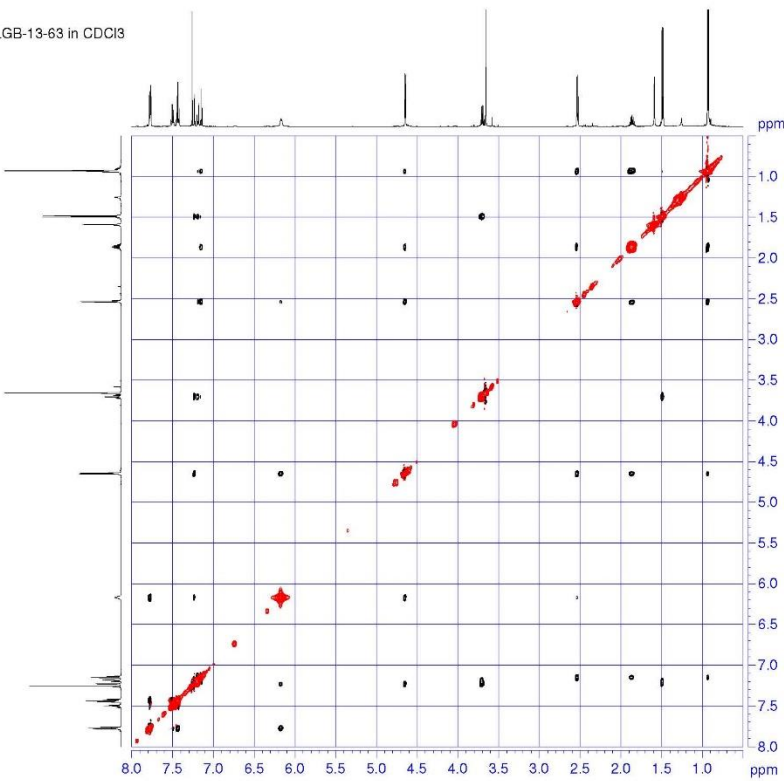

**I1 Guobao IGB-13-63 in CDCl3**  
 INDESY 500 MHz  
 2022-04-05

```

NAME      LGB-13-63
EXPNO    1
PROCNO   1
Date_    20220405
Time     20.09
INSTRUM  spect
PROBHD   5 mm TBI HX-BB
PULPROG  zgpg30
TD        65536
SFO1     500.136099 MHz
TE        300.2
SOLVENT  CDCl3
NS        2048
DS        4
SWH       5122.204 Hz
FIDRES   0.159368 sec
AQ        0.159368 sec
RG        97.600 uspec
TE        6.00 uspec
TD        0.0
DO        0.0000000 sec
DL        2.0000000 sec
IL        0.0000000 sec
IS        0.0000000 sec
US        0.0000000 sec
LH        0.0000000 sec
LL        0.0000000 sec
TMO       0.0000975 sec

===== CHANNEL f1 =====
NUC1      1H
P1         10.00 usec
P2         20.00 usec
PL1        0.00 dB
PL2        0.00 dB
SFO1      500.136099 MHz

===== GRADIENT CHANNEL =====
GPRG1     sine,100
GPRG2     sine,100
GPRG3     0.00 %
GPRG4     0.00 %
GPRG5     0.00 %
GPRG6     0.00 %
GPRG7     0.00 %
GPRG8     0.00 %
GPRG9     0.00 %
GPRG10    0.00 %
GPRG11    0.00 %
GPRG12    0.00 %
GPRG13    0.00 %
GPRG14    0.00 %
GPRG15    0.00 %
GPRG16    0.00 %
GPRG17    0.00 %
GPRG18    0.00 %
GPRG19    0.00 %
GPRG20    0.00 %
GPRG21    0.00 %
GPRG22    0.00 %
GPRG23    0.00 %
GPRG24    0.00 %
GPRG25    0.00 %
GPRG26    0.00 %
GPRG27    0.00 %
GPRG28    0.00 %
GPRG29    0.00 %
GPRG30    0.00 %
GPRG31    0.00 %
GPRG32    0.00 %
GPRG33    0.00 %
GPRG34    0.00 %
GPRG35    0.00 %
GPRG36    0.00 %
GPRG37    0.00 %
GPRG38    0.00 %
GPRG39    0.00 %
GPRG40    0.00 %
GPRG41    0.00 %
GPRG42    0.00 %
GPRG43    0.00 %
GPRG44    0.00 %
GPRG45    0.00 %
GPRG46    0.00 %
GPRG47    0.00 %
GPRG48    0.00 %
GPRG49    0.00 %
GPRG50    0.00 %
GPRG51    0.00 %
GPRG52    0.00 %
GPRG53    0.00 %
GPRG54    0.00 %
GPRG55    0.00 %
GPRG56    0.00 %
GPRG57    0.00 %
GPRG58    0.00 %
GPRG59    0.00 %
GPRG60    0.00 %
GPRG61    0.00 %
GPRG62    0.00 %
GPRG63    0.00 %
GPRG64    0.00 %
GPRG65    0.00 %
GPRG66    0.00 %
GPRG67    0.00 %
GPRG68    0.00 %
GPRG69    0.00 %
GPRG70    0.00 %
GPRG71    0.00 %
GPRG72    0.00 %
GPRG73    0.00 %
GPRG74    0.00 %
GPRG75    0.00 %
GPRG76    0.00 %
GPRG77    0.00 %
GPRG78    0.00 %
GPRG79    0.00 %
GPRG80    0.00 %
GPRG81    0.00 %
GPRG82    0.00 %
GPRG83    0.00 %
GPRG84    0.00 %
GPRG85    0.00 %
GPRG86    0.00 %
GPRG87    0.00 %
GPRG88    0.00 %
GPRG89    0.00 %
GPRG90    0.00 %
GPRG91    0.00 %
GPRG92    0.00 %
GPRG93    0.00 %
GPRG94    0.00 %
GPRG95    0.00 %
GPRG96    0.00 %
GPRG97    0.00 %
GPRG98    0.00 %
GPRG99    0.00 %
GPRG100   0.00 %
  
```



LGB-13-60 in CDCl<sub>3</sub>

NMR Data were recorded at ambient temperature on a Bruker Avance III 600 spectrometer operating at 600.1 MHz for <sup>1</sup>H and 125.8 MHz for <sup>13</sup>C. Chemical shifts  $\delta$  are given in ppm relative to TMS. The solvent signals were used as reference (<sup>1</sup>H:  $\delta_{\text{H}}$  7.260 ppm residual CHCl<sub>3</sub>, <sup>13</sup>C:  $\delta_{\text{C}}$  77.16 ppm). Coupling constants were given in Hertz and determined assuming first-order spin-spin coupling.

red <sup>13</sup>C chemical shift  
blue <sup>1</sup>H chemical shift

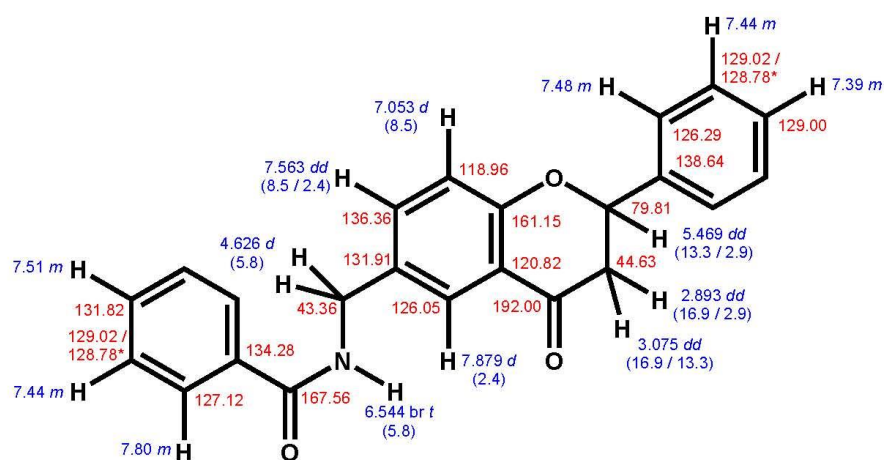

\* signal assignment not unambiguous

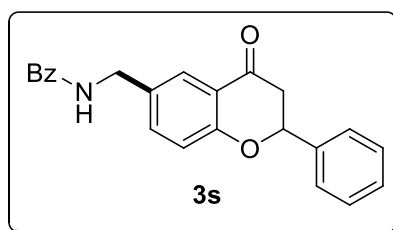

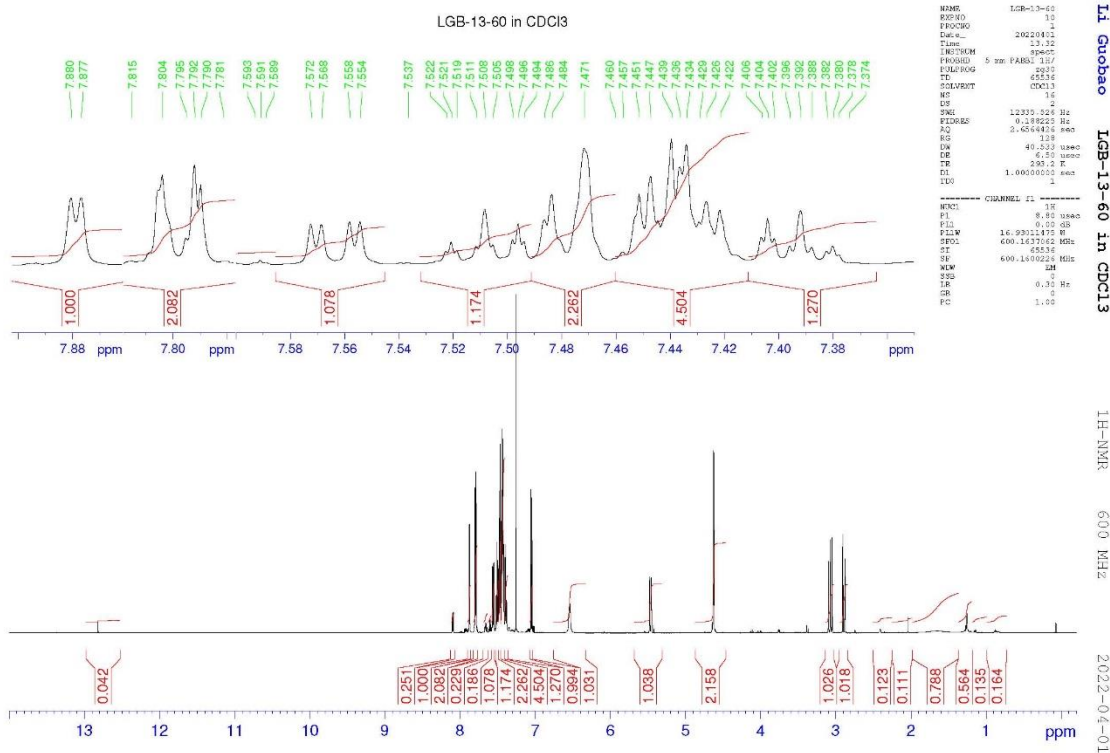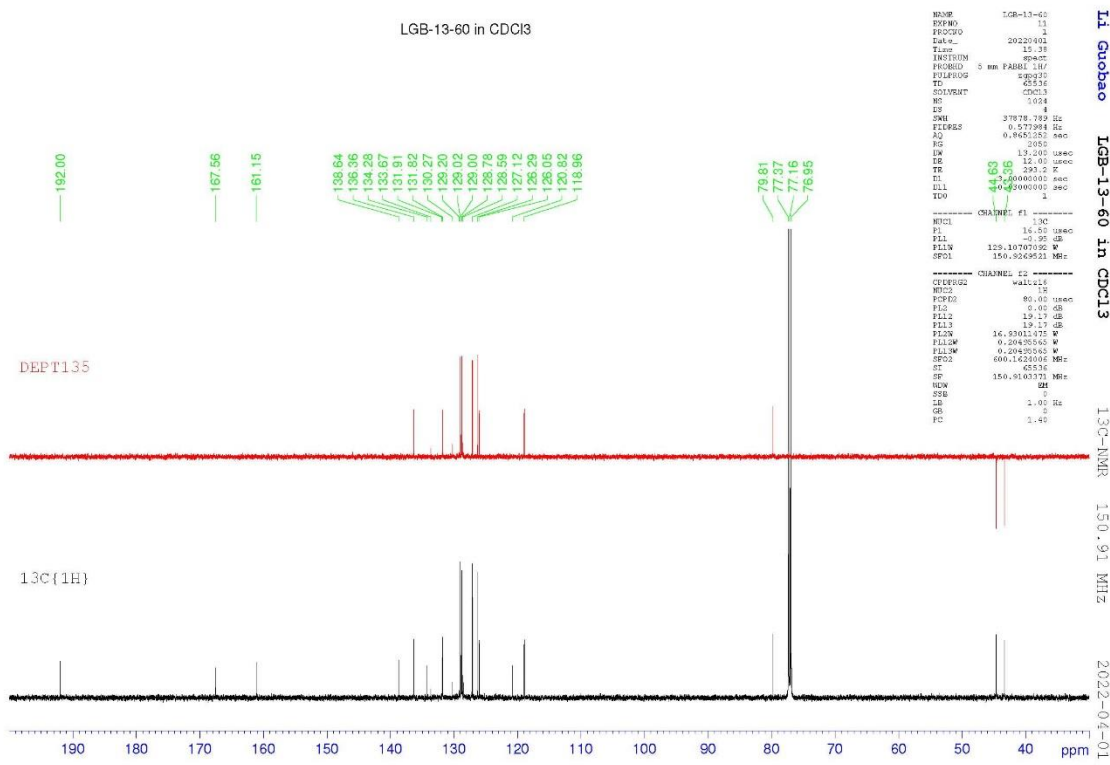

LGB-13-60 in CDCl3

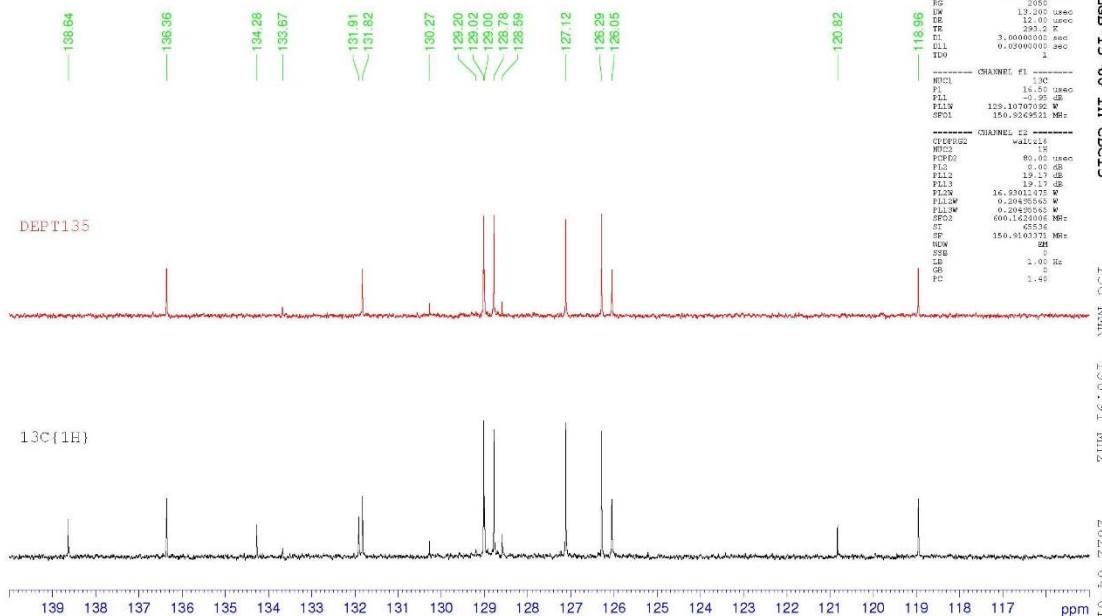

**I1 Guobao**  
**LGB-13-60 in CDCl3**  
**13C-NMR**  
**150.91 MHz**  
**2022-04-01**

|         |                |
|---------|----------------|
| NAME    | LGB-13-60      |
| EXPNO   | 13             |
| PROCNO  | 1              |
| F2Ac_   | 20220401       |
| Date_   | 15.15          |
| INSTRUM | cpac           |
| PROBHD  | 5 mm PABBI 1H/ |
| PULPROG | zgpg2          |
| TD      | 65536          |
| SOLVENT | CDCl3          |
| MS      | 1024           |
| SI      | 1              |
| SMH     | 37078.789 Hz   |
| FIDRES  | 0.577394 Hz    |
| AQ      | 0.865135 sec   |
| RG      | 320            |
| SW      | 19.200 usec    |
| DE      | 19.00 usec     |
| TE      | 300.2 K        |
| TD      | 3.0000000 sec  |
| LL      | 0.0299000 sec  |
| TD0     | 1              |

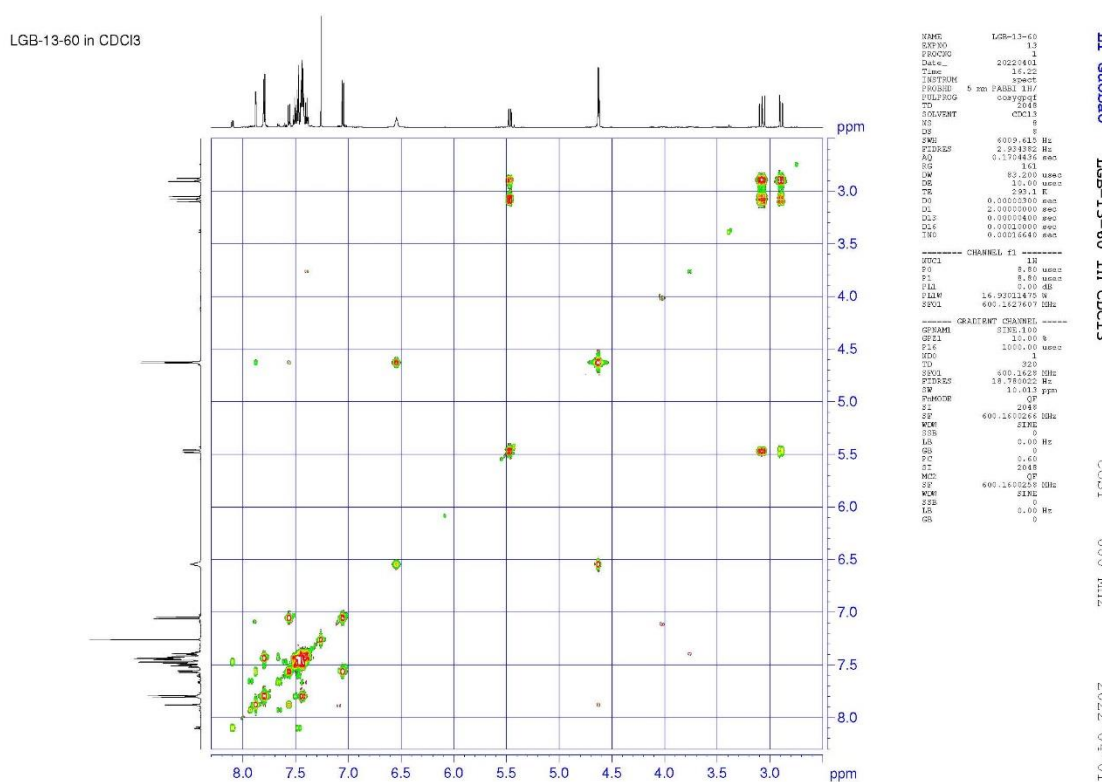

**I1 Guobao**  
**LGB-13-60 in CDCl3**  
**COSY**  
**600 MHz**  
**2022-04-01**

|         |                |
|---------|----------------|
| NAME    | LGB-13-60      |
| EXPNO   | 13             |
| PROCNO  | 1              |
| F2Ac_   | 20220401       |
| Date_   | 16.22          |
| INSTRUM | cpac           |
| PROBHD  | 5 mm PABBI 1H/ |
| PULPROG | cosyprgf       |
| TD      | 2688           |
| SOLVENT | CDCl3          |
| SI      | 8              |
| SMH     | 600.648 Hz     |
| FIDRES  | 2.934952 Hz    |
| AQ      | 0.170465 sec   |
| RG      | 161            |
| SW      | 83.200 usec    |
| DE      | 10.00 usec     |
| TE      | 300.2 K        |
| TD      | 0.3000000 sec  |
| LL      | 2.0000000 sec  |
| LL2     | 0.3000000 sec  |
| DC      | 0.0000000 sec  |
| TD0     | 0.3000000 sec  |

LGB-13-60 in CDCl3

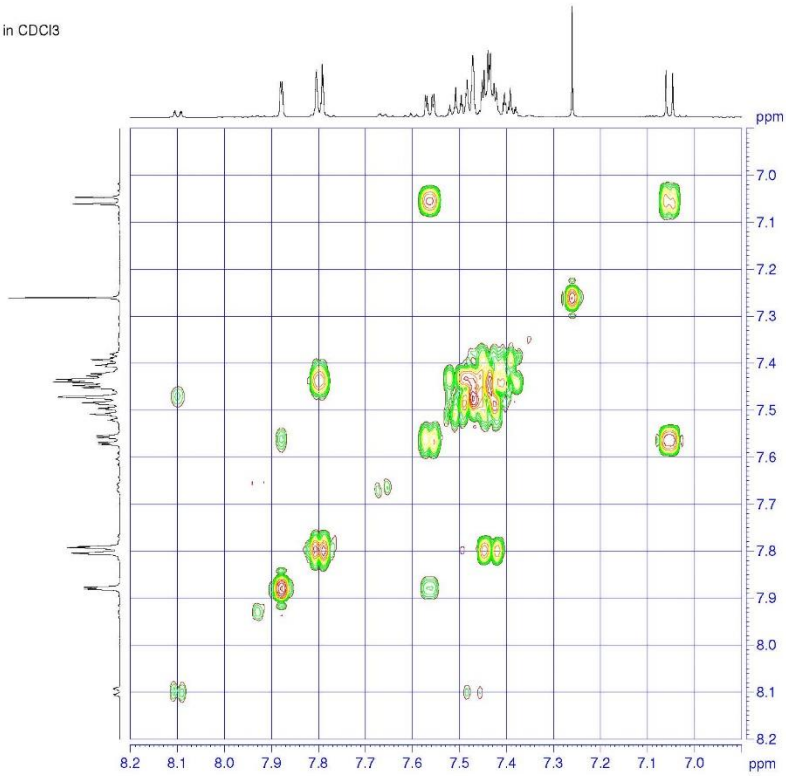

NAME LGB-13-60  
 EXPNO 13  
 PROCNO 1  
 Date\_ 20220401  
 Time 14:22  
 INSTRUM spect  
 PULPROG zgpg30  
 F2 - 5 mm PABBI 1H/  
 CUPROG2 cupro2gpi  
 TD 3284  
 SOLVENT CDCl3  
 NS 8  
 DS 8  
 SWH 4009.440 Hz  
 FIDRES 2.934952 Hz  
 AQ 0.1704436 sec  
 RG 101  
 DW 83.200 usec  
 DE 11.00 usec  
 TE 293.1 K  
 D0 0.0000000 sec  
 DL 2.0000000 sec  
 DLE 0.0000000 sec  
 DLF 0.0000000 sec  
 TMO 0.0000000 sec

----- CHANNEL f1 -----  
 NUCL 13C  
 P1 8.50 usec  
 PL 0.00 dB  
 PL2 0.00 dB  
 PLW 16.00011478 Hz  
 SFOL 600.1427007 MHz

----- GRADIENT CHANNEL -----  
 GPMAX 3000.000  
 GPC 25.00 Hz  
 P1C 1000.00 usec  
 TD 320  
 SFOL 150.922418 MHz  
 FIDRES 18.780000 Hz  
 DW 13.000 Hz  
 PULPROG echo-anelecho  
 SF 600.1400248 MHz  
 WCN 2  
 SFB 0  
 LS 0.00 Hz  
 GB 0  
 PC 1.40  
 SI 1024  
 MC2 echo-anelecho  
 SF 150.922418 MHz  
 WCN 2  
 SFB 0  
 LS 0.00 Hz  
 GB 0

I1 Guobao IGB-13-60 in CDCl3 COSY 600 MHz 2022-04-01

LGB-13-60 in CDCl3

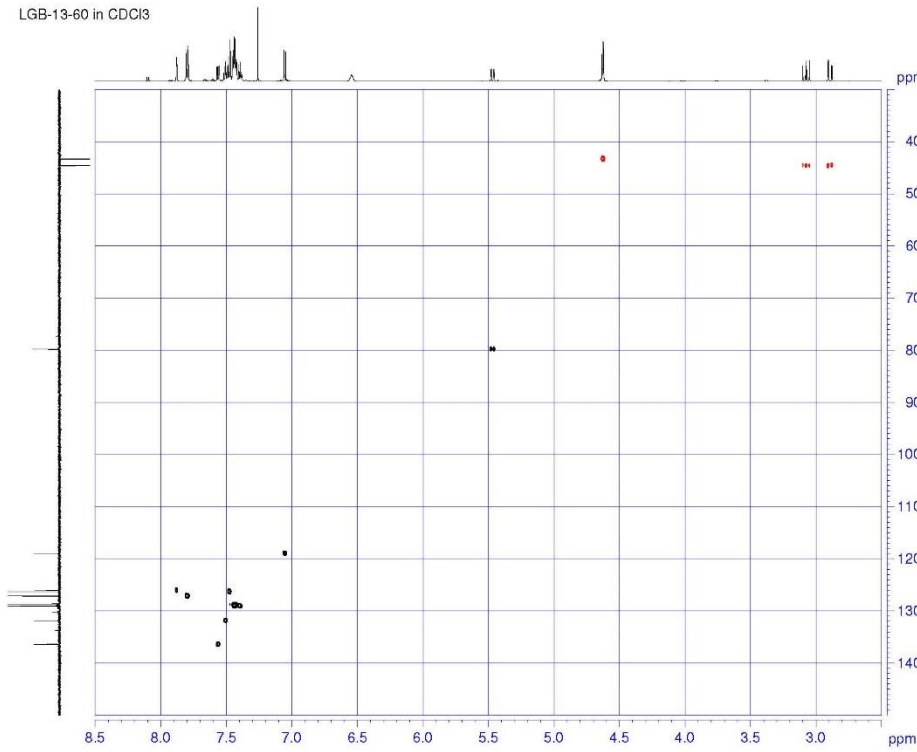

NAME LGB-13-60  
 EXPNO 14  
 PROCNO 1  
 Date\_ 20220401  
 Time 13:40  
 INSTRUM spect  
 PULPROG zgpg30  
 F2 - 5 mm PABBI 1H/  
 CUPROG2 cupro2gpi  
 TD 3284  
 SOLVENT CDCl3  
 NS 8  
 DS 8  
 SWH 4009.440 Hz  
 FIDRES 2.934952 Hz  
 AQ 0.1704436 sec  
 RG 101  
 DW 83.200 usec  
 DE 11.00 usec  
 TE 293.1 K  
 D0 0.0000000 sec  
 DL 2.0000000 sec  
 DLE 0.0000000 sec  
 DLF 0.0000000 sec  
 TMO 0.0000000 sec

----- CHANNEL f1 -----  
 NUCL 13C  
 P1 8.50 usec  
 PL 0.00 dB  
 PL2 0.00 dB  
 PLW 16.00011478 Hz  
 SFOL 600.1427007 MHz

----- CHANNEL f2 -----  
 GPMAX 3000.000  
 GPC 25.00 Hz  
 P1C 1000.00 usec  
 TD 320  
 SFOL 150.922418 MHz  
 FIDRES 18.780000 Hz  
 DW 13.000 Hz  
 PULPROG echo-anelecho  
 SF 600.1400248 MHz  
 WCN 2  
 SFB 0  
 LS 0.00 Hz  
 GB 0  
 PC 1.40  
 SI 1024  
 MC2 echo-anelecho  
 SF 150.922418 MHz  
 WCN 2  
 SFB 0  
 LS 0.00 Hz  
 GB 0

I1 Guobao IGB-13-60 in CDCl3 HSCQ 600/151 MHz 2022-04-01



LGB-13-60 in CDCl3

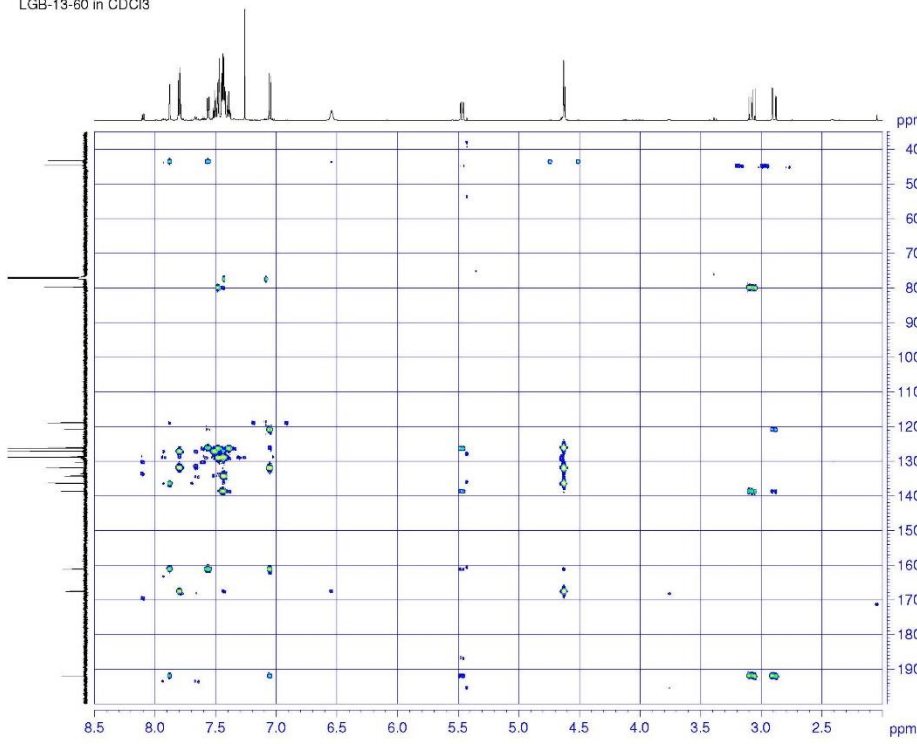

NAME LGB-13-60  
EXPNO 1  
PROCNO 1  
Date\_ 20220401  
Time 17:38  
INSTRUM spect  
F2H2PRG 3 nu FARE 1H/13  
F2H2PRG hmbh3pprdef  
TE 40.96  
SOLVENT CDCl3  
NS 16  
DS 16  
SWH 782.500 Hz  
FIDRES 1.297349 Hz  
AQ 0.2821940 sec  
RG 250  
F2 66.300 sec  
F2 10.00 sec  
TE 300.0 K  
CMT2 145.000000  
CMT13 10.000000  
LO 0.0000000 sec  
LI 1.71548000 sec  
LQ 0.0004400 sec  
LX 0.00000000 sec  
LW 0.00010000 sec  
TWO 0.00001490 sec

----- CHANNEL f1 -----  
NUC1 13C  
P1 8.00 usec  
PL 17.00 dB  
PC 0.00 dB  
FLW 16.2301475 MHz  
SFO1 600.1435010 MHz

----- CHANNEL f2 -----  
NUC2 1H  
P2 15.00 usec  
PL -9.00 dB  
PC 0.00 dB  
FLW 129.1070700 MHz  
SFO2 150.9248511 MHz

----- GRADIENT CHANNEL -----  
GSHW2 SINE.100  
GSHW3 SINE.100  
GSHW4 SINE.100  
SHE1 50.00 V  
SHE2 50.00 V  
SHE3 40.00 V  
PLG 1000.00 usec  
MTO 0  
TI 320  
SFO1 150.9248511 MHz  
SFO2 104.7504044 Hz  
SW 222.000 usec  
F2H2PRG hmbh3pprdef  
TE 40.96  
SOLVENT CDCl3  
NS 16  
DS 16  
SWH 782.500 Hz  
FIDRES 1.297349 Hz  
AQ 0.2821940 sec  
RG 250  
F2 66.300 sec  
F2 10.00 sec  
TE 300.0 K  
CMT2 145.000000  
CMT13 10.000000  
LO 0.0000000 sec  
LI 1.71548000 sec  
LQ 0.0004400 sec  
LX 0.00000000 sec  
LW 0.00010000 sec  
TWO 0.00001490 sec

----- CHANNEL f1 -----  
NUC1 13C  
P1 8.00 usec  
PL 17.00 dB  
PC 0.00 dB  
FLW 16.2301475 MHz  
SFO1 600.1435010 MHz

----- CHANNEL f2 -----  
NUC2 1H  
P2 15.00 usec  
PL -9.00 dB  
PC 0.00 dB  
FLW 129.1070700 MHz  
SFO2 150.9248511 MHz

----- GRADIENT CHANNEL -----  
GSHW2 SINE.100  
GSHW3 SINE.100  
GSHW4 SINE.100  
SHE1 50.00 V  
SHE2 50.00 V  
SHE3 40.00 V  
PLG 1000.00 usec  
MTO 0  
TI 320  
SFO1 150.9248511 MHz  
SFO2 104.7504044 Hz  
SW 222.000 usec  
F2H2PRG hmbh3pprdef  
TE 40.96  
SOLVENT CDCl3  
NS 16  
DS 16  
SWH 782.500 Hz  
FIDRES 1.297349 Hz  
AQ 0.2821940 sec  
RG 250  
F2 66.300 sec  
F2 10.00 sec  
TE 300.0 K  
CMT2 145.000000  
CMT13 10.000000  
LO 0.0000000 sec  
LI 1.71548000 sec  
LQ 0.0004400 sec  
LX 0.00000000 sec  
LW 0.00010000 sec  
TWO 0.00001490 sec

I1 Guobao IGB-13-60 in CDCl3 HMBG 600/151 MHz 2022-04-01

LGB-13-60 in CDCl3

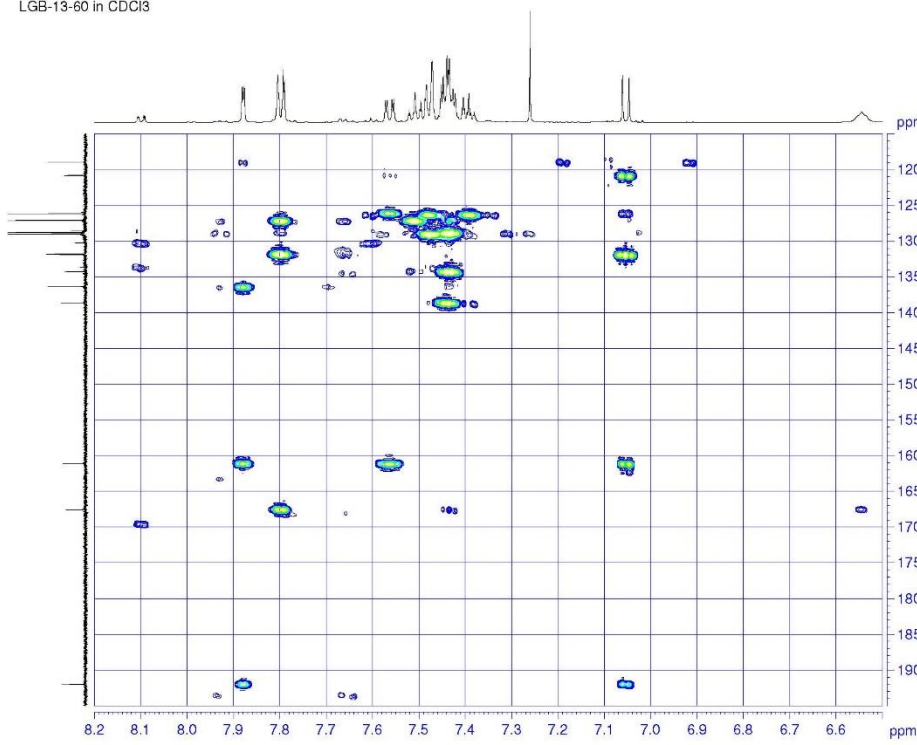

NAME LGB-13-60  
EXPNO 1  
PROCNO 1  
Date\_ 20220401  
Time 17:38  
INSTRUM spect  
F2H2PRG 3 nu FARE 1H/13  
F2H2PRG hmbh3pprdef  
TE 40.96  
SOLVENT CDCl3  
NS 16  
DS 16  
SWH 782.500 Hz  
FIDRES 1.297349 Hz  
AQ 0.2821940 sec  
RG 250  
F2 66.300 sec  
F2 10.00 sec  
TE 300.0 K  
CMT2 145.000000  
CMT13 10.000000  
LO 0.0000000 sec  
LI 1.71548000 sec  
LQ 0.0004400 sec  
LX 0.00000000 sec  
LW 0.00010000 sec  
TWO 0.00001490 sec

----- CHANNEL f1 -----  
NUC1 13C  
P1 8.00 usec  
PL 17.00 dB  
PC 0.00 dB  
FLW 16.2301475 MHz  
SFO1 600.1435010 MHz

----- CHANNEL f2 -----  
NUC2 1H  
P2 15.00 usec  
PL -9.00 dB  
PC 0.00 dB  
FLW 129.1070700 MHz  
SFO2 150.9248511 MHz

----- GRADIENT CHANNEL -----  
GSHW2 SINE.100  
GSHW3 SINE.100  
GSHW4 SINE.100  
SHE1 50.00 V  
SHE2 50.00 V  
SHE3 40.00 V  
PLG 1000.00 usec  
MTO 0  
TI 320  
SFO1 150.9248511 MHz  
SFO2 104.7504044 Hz  
SW 222.000 usec  
F2H2PRG hmbh3pprdef  
TE 40.96  
SOLVENT CDCl3  
NS 16  
DS 16  
SWH 782.500 Hz  
FIDRES 1.297349 Hz  
AQ 0.2821940 sec  
RG 250  
F2 66.300 sec  
F2 10.00 sec  
TE 300.0 K  
CMT2 145.000000  
CMT13 10.000000  
LO 0.0000000 sec  
LI 1.71548000 sec  
LQ 0.0004400 sec  
LX 0.00000000 sec  
LW 0.00010000 sec  
TWO 0.00001490 sec

----- CHANNEL f1 -----  
NUC1 13C  
P1 8.00 usec  
PL 17.00 dB  
PC 0.00 dB  
FLW 16.2301475 MHz  
SFO1 600.1435010 MHz

----- CHANNEL f2 -----  
NUC2 1H  
P2 15.00 usec  
PL -9.00 dB  
PC 0.00 dB  
FLW 129.1070700 MHz  
SFO2 150.9248511 MHz

----- GRADIENT CHANNEL -----  
GSHW2 SINE.100  
GSHW3 SINE.100  
GSHW4 SINE.100  
SHE1 50.00 V  
SHE2 50.00 V  
SHE3 40.00 V  
PLG 1000.00 usec  
MTO 0  
TI 320  
SFO1 150.9248511 MHz  
SFO2 104.7504044 Hz  
SW 222.000 usec  
F2H2PRG hmbh3pprdef  
TE 40.96  
SOLVENT CDCl3  
NS 16  
DS 16  
SWH 782.500 Hz  
FIDRES 1.297349 Hz  
AQ 0.2821940 sec  
RG 250  
F2 66.300 sec  
F2 10.00 sec  
TE 300.0 K  
CMT2 145.000000  
CMT13 10.000000  
LO 0.0000000 sec  
LI 1.71548000 sec  
LQ 0.0004400 sec  
LX 0.00000000 sec  
LW 0.00010000 sec  
TWO 0.00001490 sec

I1 Guobao IGB-13-60 in CDCl3 HMBG 600/151 MHz 2022-04-01

LGB-13-60 in CDCl3

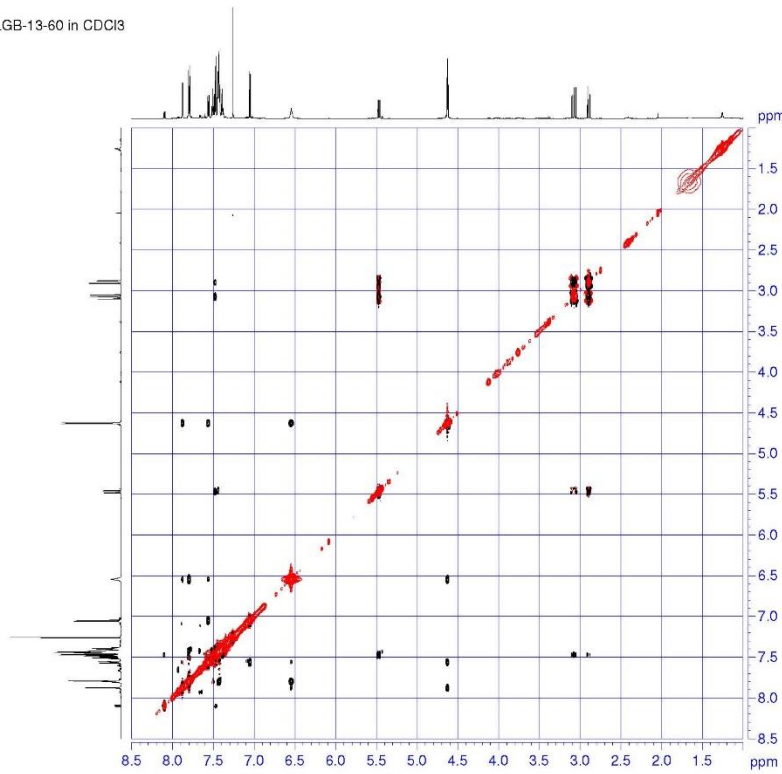

```

NAME      LGB-13-60
EXPNO     1
PROCNO    1
DATE_     20220401
TIME      20.22
INSTRUM   spect
PROBHD    5 mm FARET 1H/
PULPROG   noesypprog
TD         2048
SOLVENT   CDCl3
NS         16
DS         16
SWH        7912.500 Hz
FIDRES     3.314927 Hz
AQ         0.1311220 sec
RG         80.6
WDW        EM
SSB        0
LB         64.000 Hz
GB         0
DO         0.0005288 sec
DL         2.5000000 sec
DS         0.8000000 sec
UL         0.0001000 sec
TNO        0.00012815 sec
  
```

Li Guobao IGB-13-60 in CDCl3 NOESY 600 MHz 2022-04-01

LGB-13-60 in CDCl3

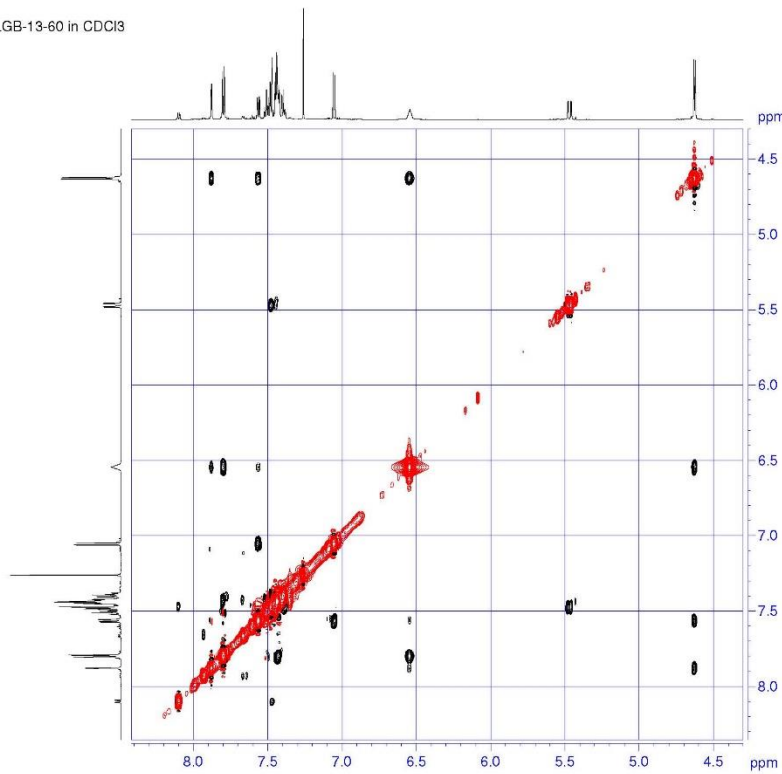

```

NAME      LGB-13-60
EXPNO     1
PROCNO    1
DATE_     20220401
TIME      20.22
INSTRUM   spect
PROBHD    5 mm FARET 1H/
PULPROG   noesypprog
TD         2048
SOLVENT   CDCl3
NS         16
DS         16
SWH        7912.500 Hz
FIDRES     3.314927 Hz
AQ         0.1311220 sec
RG         80.6
WDW        EM
SSB        0
LB         64.000 Hz
GB         0
DO         0.0005288 sec
DL         2.5000000 sec
DS         0.8000000 sec
UL         0.0001000 sec
TNO        0.00012815 sec
  
```

Li Guobao IGB-13-60 in CDCl3 NOESY 600 MHz 2022-04-01
